# Supplementary material for: Pathway Maps of Orphan and Complex Diseases Using an Integrative Computational Approach
Source: Biomed Res Int. 2020 Nov 27;2020:4280467. doi: 10.1155/2020/4280467 (PMC7744584; doi:10.1155/2020/4280467)
Supplement: Supplementary 1 — Supplementary Table 1: Examples of Orphan Diseases associated to hub genes based on degree centrality measure. [file 4280467.f1.xlsx]

## Sheet: Sheet1
Supplementary Table1: Examples of Orphan Diseases associated to hub genes based on degree centrality measure
Gene Symbol	Orphan Diseases Names
LMNA	Heart-hand syndrome, Slovenian type
	Restrictive dermopathy
	Congenital muscular dystrophy due to LMNA mutation
	Familial partial lipodystrophy, Dunnigan type
	Dilated cardiomyopathy-hypergonadotropic hypogonadism syndrome
	Hutchinson-Gilford progeria syndrome
	Autosomal semi-dominant severe lipodystrophic laminopathy
	LMNA-related cardiocutaneous progeria syndrome
	Familial isolated arrhythmogenic ventricular dysplasia, right dominant form
	Familial isolated arrhythmogenic ventricular dysplasia, biventricular form
	Familial isolated arrhythmogenic ventricular dysplasia, left dominant form
	Familial dilated cardiomyopathy with conduction defect due to LMNA mutation
	Left ventricular noncompaction
	Mandibuloacral dysplasia with type A lipodystrophy
	Atypical Werner syndrome
	Autosomal dominant Emery-Dreifuss muscular dystrophy
	Autosomal recessive Emery-Dreifuss muscular dystrophy
	Charcot-Marie-Tooth disease type 2B1 \\
HBB	Sickle cell anemia
	Hereditary persistence of fetal hemoglobin-sickle cell disease syndrome
	Sickle cell-hemoglobin D disease syndrome
	Sickle cell-hemoglobin E disease syndrome
	Sickle cell-beta-thalassemia disease syndrome
	Sickle cell-hemoglobin C disease syndrome
	Hemoglobin C disease
	Hemoglobin E disease
	Hemoglobin E-beta-thalassemia syndrome
	Hemoglobin C-beta-thalassemia syndrome
	Delta-beta-thalassemia
	Dominant beta-thalassemia
	Beta-thalassemia intermedia
	Beta-thalassemia major
	Hemoglobin Lepore-beta-thalassemia syndrome
	Hemoglobin M disease
	Hereditary persistence of fetal hemoglobin-beta-thalassemia syndrome
	Hemoglobin D disease
PTEN	Proteus syndrome
	Bannayan-Riley-Ruvalcaba syndrome
	Segmental outgrowth-lipomatosis-arteriovenous malformation-epidermal nevus syndrome
	Proteus-like syndrome
	Macrocephaly-intellectual disability-autism syndrome
	Hereditary breast and ovarian cancer syndrome
	Activated PI3K-delta syndrome
	Squamous cell carcinoma of the hypopharynx
	Squamous cell carcinoma of the larynx
	Squamous cell carcinoma of the oropharynx
	Squamous cell carcinoma of salivary glands
	Squamous cell carcinoma of the nasal cavity and paranasal sinuses
	Squamous cell carcinoma of the oral cavity
	Squamous cell carcinoma of the lip
	Lhermitte-Duclos disease
	Juvenile polyposis of infancy
FGFR1	Myeloid/lymphoid neoplasm associated with FGFR1 rearrangement
	Hartsfield syndrome
	Encephalocraniocutaneous lipomatosis
	Gliosarcoma
	Giant cell glioblastoma
	Pilomyxoid astrocytoma
	Osteoglosphonic dysplasia
	Isolated trigonocephaly
	Septo-optic dysplasia spectrum
	Microform holoprosencephaly
	Kallmann syndrome
	Semilobar holoprosencephaly
	Primary hypereosinophilic syndrome
	Normosmic congenital hypogonadotropic hypogonadism
	Pfeiffer syndrome type 1
	Lobar holoprosencephaly
	Oligodontia
