# Supplementary material for: Pathway Maps of Orphan and Complex Diseases Using an Integrative Computational Approach
Source: Biomed Res Int. 2020 Nov 27;2020:4280467. doi: 10.1155/2020/4280467 (PMC7744584; doi:10.1155/2020/4280467)
Supplement: Supplementary 2 — Supplementary Table 2: Orphan Diseases KEGG pathways enrichment. [file 4280467.f2.xlsx]

## Sheet: Sheet1
Supplementary File 2 : Orphan Diseases KEGG Pathways enrichment
Disease Name	KEGGID	Term	Pvalue	inGenes	adjpvalsK
WHIM syndrome, 193670 (3)	hsa04672	Intestinal immune network for IgA production	0.00817856534332939	CXCR4	0.04109729085023
WHIM syndrome, 193670 (3)	hsa04670	Leukocyte transendothelial migration	0.0197648662463792	CXCR4	0.04109729085023
WHIM syndrome, 193670 (3)	hsa04360	Axon guidance	0.0219798943601976	CXCR4	0.04109729085023
WHIM syndrome, 193670 (3)	hsa04062	Chemokine signaling pathway	0.0322031010393593	CXCR4	0.04109729085023
WHIM syndrome, 193670 (3)	hsa04144	Endocytosis	0.0342477423751917	CXCR4	0.04109729085023
WHIM syndrome, 193670 (3)	hsa04060	Cytokine-cytokine receptor interaction	0.0451524961662976	CXCR4	0.0451524961662976
Pontocerebellar hypoplasia type 2	hsa00450	Selenocompound metabolism	0.0028965752257627	SEPSECS	0.0057931504515254
Pontocerebellar hypoplasia type 2	hsa00970	Aminoacyl-tRNA biosynthesis	0.0107343670131198	SEPSECS	0.0107343670131198
Microphthalmia with linear skin defects syndrome	hsa05012	Parkinson's disease	0.00143958417490024	COX7B, NDUFB11	0.00426241276263593
Microphthalmia with linear skin defects syndrome	hsa00190	Oxidative phosphorylation	0.00148405180745701	COX7B, NDUFB11	0.00426241276263593
Microphthalmia with linear skin defects syndrome	hsa05010	Alzheimer's disease	0.00236958199068402	COX7B, NDUFB11	0.00426241276263593
Microphthalmia with linear skin defects syndrome	hsa05016	Huntington's disease	0.00284160850842395	COX7B, NDUFB11	0.00426241276263593
Microphthalmia with linear skin defects syndrome	hsa00860	Porphyrin and chlorophyll metabolism	0.0218229405169009	HCCS	0.0261875286202811
Microphthalmia with linear skin defects syndrome	hsa04260	Cardiac muscle contraction	0.0388517513150249	COX7B	0.0388517513150249
Central core disease	hsa04730	Long-term depression	0.011927074459022	RYR1	0.0238541489180439
Central core disease	hsa04020	Calcium signaling pathway	0.0301584597035269	RYR1	0.0301584597035269
Carney complex	hsa04210	Apoptosis	0.0148236496847843	PRKAR1A	0.023513375362072
Carney complex	hsa04910	Insulin signaling pathway	0.023513375362072	PRKAR1A	0.023513375362072
Spinal muscular atrophy-progressive myoclonic epilepsy syndrome	hsa00600	Sphingolipid metabolism	0.00681547111944103	ASAH1	0.0136309422388821
Spinal muscular atrophy-progressive myoclonic epilepsy syndrome	hsa04142	Lysosome	0.0206168001363094	ASAH1	0.0206168001363094
Myhre syndrome	hsa05210	Colorectal cancer	0.0105639802351337	SMAD4	0.0200374850911568
Myhre syndrome	hsa05212	Pancreatic cancer	0.011927074459022	SMAD4	0.0200374850911568
Myhre syndrome	hsa05220	Chronic myeloid leukemia	0.0124382347929801	SMAD4	0.0200374850911568
Myhre syndrome	hsa04520	Adherens junction	0.0124382347929801	SMAD4	0.0200374850911568
Myhre syndrome	hsa04350	TGF-beta signaling pathway	0.0143124893508263	SMAD4	0.0200374850911568
Myhre syndrome	hsa04110	Cell cycle	0.0211279604702675	SMAD4	0.0246492872153121
Myhre syndrome	hsa04310	Wnt signaling pathway	0.0255580166979043	SMAD4	0.0255580166979043
20p12.3 microdeletion syndrome	hsa05217	Basal cell carcinoma	0.00937127278923144	BMP2	0.0190833191344351
20p12.3 microdeletion syndrome	hsa04340	Hedgehog signaling pathway	0.00954165956721764	BMP2	0.0190833191344351
20p12.3 microdeletion syndrome	hsa04350	TGF-beta signaling pathway	0.0143124893508263	BMP2	0.0190833191344351
20p12.3 microdeletion syndrome	hsa04060	Cytokine-cytokine receptor interaction	0.0451524961662976	BMP2	0.0451524961662976
Distal 17p13.3 microdeletion syndrome	hsa04114	Oocyte meiosis	0.0190833191344352	YWHAE	0.0216391208042256
Distal 17p13.3 microdeletion syndrome	hsa04110	Cell cycle	0.0211279604702675	YWHAE	0.0216391208042256
Distal 17p13.3 microdeletion syndrome	hsa04722	Neurotrophin signaling pathway	0.0216391208042256	YWHAE	0.0216391208042256
Distal 22q11.2 microdeletion syndrome	hsa05220	Chronic myeloid leukemia	1.84690008961757e-06	BCR, MAPK1, CRKL	7.20291034950853e-05
Distal 22q11.2 microdeletion syndrome	hsa05200	Pathways in cancer	0.000169893071624044	BCR, MAPK1, CRKL	0.00331291489666885
Distal 22q11.2 microdeletion syndrome	hsa05131	Shigellosis	0.000316684450812565	MAPK1, CRKL	0.00407052131767334
Distal 22q11.2 microdeletion syndrome	hsa05211	Renal cell carcinoma	0.000417489365915214	MAPK1, CRKL	0.00407052131767334
Distal 22q11.2 microdeletion syndrome	hsa04012	ErbB signaling pathway	0.00064546055021655	MAPK1, CRKL	0.00489809504054702
Distal 22q11.2 microdeletion syndrome	hsa04666	Fc gamma R-mediated phagocytosis	0.00075355308316108	MAPK1, CRKL	0.00489809504054702
Distal 22q11.2 microdeletion syndrome	hsa04722	Neurotrophin signaling pathway	0.00137413206209987	MAPK1, CRKL	0.0076558786316993
Distal 22q11.2 microdeletion syndrome	hsa04910	Insulin signaling pathway	0.00162144735414736	MAPK1, CRKL	0.00790455585146838
Distal 22q11.2 microdeletion syndrome	hsa04062	Chemokine signaling pathway	0.00302941662375767	MAPK1, CRKL	0.0131274720362833
Distal 22q11.2 microdeletion syndrome	hsa04510	Focal adhesion	0.00338896782876295	MAPK1, CRKL	0.0132169745321755
Distal 22q11.2 microdeletion syndrome	hsa04810	Regulation of actin cytoskeleton	0.00383922036962474	MAPK1, CRKL	0.0136117813104877
Distal 22q11.2 microdeletion syndrome	hsa04010	MAPK signaling pathway	0.00604482637101408	MAPK1, CRKL	0.0196456857057958
Distal 22q11.2 microdeletion syndrome	hsa04320	Dorso-ventral axis formation	0.0122198235051519	MAPK1	0.0366594705154558
Distal 22q11.2 microdeletion syndrome	hsa05216	Thyroid cancer	0.0147530250283059	MAPK1	0.0410977125788521
Distal 22q11.2 microdeletion syndrome	hsa05020	Prion diseases	0.0177871453736534	MAPK1	0.0439940039589032
Distal 22q11.2 microdeletion syndrome	hsa05219	Bladder cancer	0.0213190718392827	MAPK1	0.0439940039589032
Distal 22q11.2 microdeletion syndrome	hsa04960	Aldosterone-regulated sodium reabsorption	0.0213190718392827	MAPK1	0.0439940039589032
Distal 22q11.2 microdeletion syndrome	hsa04930	Type II diabetes mellitus	0.0243396899124961	MAPK1	0.0439940039589032
Distal 22q11.2 microdeletion syndrome	hsa04150	mTOR signaling pathway	0.0263499784196662	MAPK1	0.0439940039589032
Distal 22q11.2 microdeletion syndrome	hsa05213	Endometrial cancer	0.0263499784196662	MAPK1	0.0439940039589032
Distal 22q11.2 microdeletion syndrome	hsa05223	Non-small cell lung cancer	0.0273540863234356	MAPK1	0.0439940039589032
Distal 22q11.2 microdeletion syndrome	hsa05221	Acute myeloid leukemia	0.0288589534099545	MAPK1	0.0439940039589032
Distal 22q11.2 microdeletion syndrome	hsa04621	NOD-like receptor signaling pathway	0.0293602306191371	MAPK1	0.0439940039589032
Distal 22q11.2 microdeletion syndrome	hsa05210	Colorectal cancer	0.0313636144827795	MAPK1	0.0439940039589032
Distal 22q11.2 microdeletion syndrome	hsa05214	Glioma	0.032864341990224	MAPK1	0.0439940039589032
Distal 22q11.2 microdeletion syndrome	hsa05100	Bacterial invasion of epithelial cells	0.0353621085157666	CRKL	0.0439940039589032
Distal 22q11.2 microdeletion syndrome	hsa04720	Long-term potentiation	0.0353621085157666	MAPK1	0.0439940039589032
Distal 22q11.2 microdeletion syndrome	hsa05212	Pancreatic cancer	0.0353621085157666	MAPK1	0.0439940039589032
Distal 22q11.2 microdeletion syndrome	hsa04730	Long-term depression	0.0353621085157666	MAPK1	0.0439940039589032
Distal 22q11.2 microdeletion syndrome	hsa05218	Melanoma	0.0358611451900989	MAPK1	0.0439940039589032
Distal 22q11.2 microdeletion syndrome	hsa05140	Leishmaniasis	0.0363600097234603	MAPK1	0.0439940039589032
Distal 22q11.2 microdeletion syndrome	hsa04520	Adherens junction	0.0368587021455459	MAPK1	0.0439940039589032
Distal 22q11.2 microdeletion syndrome	hsa04662	B cell receptor signaling pathway	0.0378555707746683	MAPK1	0.0439940039589032
Distal 22q11.2 microdeletion syndrome	hsa04370	VEGF signaling pathway	0.0383537470410951	MAPK1	0.0439940039589032
Distal 22q11.2 microdeletion syndrome	hsa04664	Fc epsilon RI signaling pathway	0.0398472440041747	MAPK1	0.044401214747509
Distal 22q11.2 microdeletion syndrome	hsa04350	TGF-beta signaling pathway	0.0423329679369964	MAPK1	0.0453101690700749
Distal 22q11.2 microdeletion syndrome	hsa04914	Progesterone-mediated oocyte maturation	0.043326055017696	MAPK1	0.0453101690700749
Distal 22q11.2 microdeletion syndrome	hsa05215	Prostate cancer	0.0448143979963705	MAPK1	0.0453101690700749
Distal 22q11.2 microdeletion syndrome	hsa04540	Gap junction	0.0453101690700749	MAPK1	0.0453101690700749
Fibular aplasia-complex brachydactyly syndrome	hsa04350	TGF-beta signaling pathway	0.000202443186114279	BMPR1B, GDF5	0.000404886372228558
Fibular aplasia-complex brachydactyly syndrome	hsa04060	Cytokine-cytokine receptor interaction	0.0020314006455185	BMPR1B, GDF5	0.0020314006455185
Osteoglosphonic dysplasia	hsa05218	Melanoma	0.0120974612370082	FGFR1	0.0252740387345946
Osteoglosphonic dysplasia	hsa04520	Adherens junction	0.0124382347929801	FGFR1	0.0252740387345946
Osteoglosphonic dysplasia	hsa05215	Prostate cancer	0.0151644232407567	FGFR1	0.0252740387345946
Osteoglosphonic dysplasia	hsa04810	Regulation of actin cytoskeleton	0.0362923837110242	FGFR1	0.0453654796387802
Osteoglosphonic dysplasia	hsa04010	MAPK signaling pathway	0.0456636565002557	FGFR1	0.0456636565002557
Familial adenomatous polyposis due to 5q22.2 microdeletion	hsa05213	Endometrial cancer	0.00886011245527352	APC	0.0176066337252229
Familial adenomatous polyposis due to 5q22.2 microdeletion	hsa05217	Basal cell carcinoma	0.00937127278923144	APC	0.0176066337252229
Familial adenomatous polyposis due to 5q22.2 microdeletion	hsa05210	Colorectal cancer	0.0105639802351337	APC	0.0176066337252229
Familial adenomatous polyposis due to 5q22.2 microdeletion	hsa04310	Wnt signaling pathway	0.0255580166979043	APC	0.0319475208723803
Familial adenomatous polyposis due to 5q22.2 microdeletion	hsa04810	Regulation of actin cytoskeleton	0.0362923837110242	APC	0.0362923837110242
Alagille syndrome due to a NOTCH2 point mutation	hsa04320	Dorso-ventral axis formation	0.00408928267166464	NOTCH2	0.0080081785653433
Alagille syndrome due to a NOTCH2 point mutation	hsa04330	Notch signaling pathway	0.0080081785653433	NOTCH2	0.0080081785653433
Monoamine oxidase A deficiency	hsa00360	Phenylalanine metabolism	0.0028965752257627	MAOA	0.0100187425455785
Monoamine oxidase A deficiency	hsa00340	Histidine metabolism	0.00494121656159496	MAOA	0.0100187425455785
Monoamine oxidase A deficiency	hsa00260	Glycine, serine and threonine metabolism	0.00545237689555289	MAOA	0.0100187425455785
Monoamine oxidase A deficiency	hsa00350	Tyrosine metabolism	0.00698585789742723	MAOA	0.0100187425455785
Monoamine oxidase A deficiency	hsa00380	Tryptophan metabolism	0.0071562446754132	MAOA	0.0100187425455785
Monoamine oxidase A deficiency	hsa00330	Arginine and proline metabolism	0.00920088601124547	MAOA	0.0107343670131197
Monoamine oxidase A deficiency	hsa00982	Drug metabolism - cytochrome P450	0.0124382347929801	MAOA	0.0124382347929801
Familial multiple meningioma	hsa05200	Pathways in cancer	0.00307642793585884	PDGFB, SUFU	0.0246114234868708
Familial multiple meningioma	hsa05217	Basal cell carcinoma	0.0186563068718139	SUFU	0.0304370368589456
Familial multiple meningioma	hsa04340	Hedgehog signaling pathway	0.0189938864016135	SUFU	0.0304370368589456
Familial multiple meningioma	hsa05214	Glioma	0.0220294888756714	PDGFB	0.0304370368589456
Familial multiple meningioma	hsa05211	Renal cell carcinoma	0.0237139021324828	PDGFB	0.0304370368589456
Familial multiple meningioma	hsa05218	Melanoma	0.0240506105642356	PDGFB	0.0304370368589456
Familial multiple meningioma	hsa05215	Prostate cancer	0.0301014318180526	PDGFB	0.0304370368589456
Familial multiple meningioma	hsa04540	Gap junction	0.0304370368589456	PDGFB	0.0304370368589456
Acute necrotizing encephalopathy of childhood	hsa00071	Fatty acid degradation	0.0146008228043711	CPT2	0.0237139021324828
Acute necrotizing encephalopathy of childhood	hsa03320	PPAR signaling pathway	0.0237139021324828	CPT2	0.0237139021324828
Hyperinsulinism due to INSR deficiency	hsa04960	Aldosterone-regulated sodium reabsorption	0.0071562446754132	INSR	0.0163571306866588
Hyperinsulinism due to INSR deficiency	hsa04930	Type II diabetes mellitus	0.00817856534332939	INSR	0.0163571306866588
Hyperinsulinism due to INSR deficiency	hsa04520	Adherens junction	0.0124382347929801	INSR	0.0165843130573068
Hyperinsulinism due to INSR deficiency	hsa04910	Insulin signaling pathway	0.023513375362072	INSR	0.023513375362072
Rabson-Mendenhall syndrome	hsa04960	Aldosterone-regulated sodium reabsorption	0.0071562446754132	INSR	0.0163571306866588
Rabson-Mendenhall syndrome	hsa04930	Type II diabetes mellitus	0.00817856534332939	INSR	0.0163571306866588
Rabson-Mendenhall syndrome	hsa04520	Adherens junction	0.0124382347929801	INSR	0.0165843130573068
Rabson-Mendenhall syndrome	hsa04910	Insulin signaling pathway	0.023513375362072	INSR	0.023513375362072
Autosomal recessive multiple pterygium syndrome	hsa05416	Viral myocarditis	0.0237139021324828	MYH3	0.0444800084740419
Autosomal recessive multiple pterygium syndrome	hsa04530	Tight junction	0.0444800084740419	MYH3	0.0444800084740419
Schneckenbecken dysplasia	hsa00562	Inositol phosphate metabolism	0.00971204634520362	INPPL1	0.0132901686829102
Schneckenbecken dysplasia	hsa04070	Phosphatidylinositol signaling system	0.0132901686829102	INPPL1	0.0132901686829102
Richieri Costa-Pereira syndrome	hsa03015	mRNA surveillance pathway	0.0141421025728402	EIF4A3	0.0257284034758901
Richieri Costa-Pereira syndrome	hsa03040	Spliceosome	0.0216391208042256	EIF4A3	0.0257284034758901
Richieri Costa-Pereira syndrome	hsa03013	RNA transport	0.0257284034758901	EIF4A3	0.0257284034758901
Autosomal dominant Robinow syndrome	hsa05217	Basal cell carcinoma	6.90594795398652e-09	DVL3, WNT5A, DVL1, FZD2	4.14356877239191e-08
Autosomal dominant Robinow syndrome	hsa04916	Melanogenesis	8.26742535662296e-08	DVL3, WNT5A, DVL1, FZD2	2.48022760698689e-07
Autosomal dominant Robinow syndrome	hsa04310	Wnt signaling pathway	4.10245868506411e-07	DVL3, WNT5A, DVL1, FZD2	8.20491737012823e-07
Autosomal dominant Robinow syndrome	hsa05200	Pathways in cancer	9.35483500418789e-06	DVL3, WNT5A, DVL1, FZD2	1.40322525062818e-05
Autosomal dominant Robinow syndrome	hsa04330	Notch signaling pathway	0.000372821616256918	DVL3, DVL1	0.000447385939508301
Autosomal dominant Robinow syndrome	hsa04340	Hedgehog signaling pathway	0.0376333269983061	WNT5A	0.0376333269983061
X-linked intellectual disability, Snyder type	hsa00410	beta-Alanine metabolism	0.00374850911569258	SMS	0.00920088601124547
X-linked intellectual disability, Snyder type	hsa00270	Cysteine and methionine metabolism	0.00613392400749713	SMS	0.00920088601124547
X-linked intellectual disability, Snyder type	hsa00480	Glutathione metabolism	0.00851933889930134	SMS	0.00920088601124547
X-linked intellectual disability, Snyder type	hsa00330	Arginine and proline metabolism	0.00920088601124547	SMS	0.00920088601124547
Piebaldism	hsa05221	Acute myeloid leukemia	0.0193314078582104	KIT	0.0341248594773667
Piebaldism	hsa04520	Adherens junction	0.0247238532081322	SNAI2	0.0341248594773667
Piebaldism	hsa04640	Hematopoietic cell lineage	0.029765768703956	KIT	0.0341248594773667
Piebaldism	hsa04916	Melanogenesis	0.0341248594773667	KIT	0.0341248594773667
Phocomelia, Schinzel type	hsa05217	Basal cell carcinoma	0.00937127278923144	WNT7A	0.0190833191344353
Phocomelia, Schinzel type	hsa04340	Hedgehog signaling pathway	0.00954165956721764	WNT7A	0.0190833191344353
Phocomelia, Schinzel type	hsa04916	Melanogenesis	0.0172090645765888	WNT7A	0.0229454194354517
Phocomelia, Schinzel type	hsa04310	Wnt signaling pathway	0.0255580166979043	WNT7A	0.0255580166979043
Upper thoracic spina bifida cystica	hsa00670	One carbon pool by folate	5.31175384612342e-05	MTHFD1, MTHFR	0.000106235076922468
Upper thoracic spina bifida cystica	hsa04310	Wnt signaling pathway	0.00376407289789034	VANGL2, VANGL1	0.00376407289789034
Cervicothoracic spina bifida cystica	hsa00670	One carbon pool by folate	5.31175384612342e-05	MTHFD1, MTHFR	0.000106235076922468
Cervicothoracic spina bifida cystica	hsa04310	Wnt signaling pathway	0.00376407289789034	VANGL1, VANGL2	0.00376407289789034
Cervical spina bifida cystica	hsa00670	One carbon pool by folate	5.31175384612342e-05	MTHFD1, MTHFR	0.000106235076922468
Cervical spina bifida cystica	hsa04310	Wnt signaling pathway	0.00376407289789034	VANGL2, VANGL1	0.00376407289789034
Lumbosacral spina bifida cystica	hsa00670	One carbon pool by folate	5.31175384612342e-05	MTHFD1, MTHFR	0.000106235076922468
Lumbosacral spina bifida cystica	hsa04310	Wnt signaling pathway	0.00376407289789034	VANGL2, VANGL1	0.00376407289789034
Thoracolumbosacral spina bifida cystica	hsa00670	One carbon pool by folate	5.31175384612342e-05	MTHFD1, MTHFR	0.000106235076922468
Thoracolumbosacral spina bifida cystica	hsa04310	Wnt signaling pathway	0.00376407289789034	VANGL2, VANGL1	0.00376407289789034
Total spina bifida cystica	hsa00670	One carbon pool by folate	5.31175384612342e-05	MTHFD1, MTHFR	0.000106235076922468
Total spina bifida cystica	hsa04310	Wnt signaling pathway	0.00376407289789034	VANGL2, VANGL1	0.00376407289789034
Upper thoracic spina bifida aperta	hsa00670	One carbon pool by folate	5.31175384612342e-05	MTHFD1, MTHFR	0.000106235076922468
Upper thoracic spina bifida aperta	hsa04310	Wnt signaling pathway	0.00376407289789034	VANGL2, VANGL1	0.00376407289789034
Hypothyroidism, congenital, nongoitrous, 7, 618573 (3)	hsa04020	Calcium signaling pathway	0.0301584597035269	TRHR	0.0463452036121997
Hypothyroidism, congenital, nongoitrous, 7, 618573 (3)	hsa04080	Neuroactive ligand-receptor interaction	0.0463452036121997	TRHR	0.0463452036121997
Phakomatosis pigmentokeratotica	hsa05216	Thyroid cancer	0.00494121656159496	HRAS	0.0279634770930012
Phakomatosis pigmentokeratotica	hsa05219	Bladder cancer	0.0071562446754132	HRAS	0.0279634770930012
Phakomatosis pigmentokeratotica	hsa05213	Endometrial cancer	0.00886011245527352	HRAS	0.0279634770930012
Phakomatosis pigmentokeratotica	hsa05223	Non-small cell lung cancer	0.00920088601124547	HRAS	0.0279634770930012
Phakomatosis pigmentokeratotica	hsa05221	Acute myeloid leukemia	0.00971204634520362	HRAS	0.0279634770930012
Phakomatosis pigmentokeratotica	hsa05214	Glioma	0.0110751405690919	HRAS	0.0279634770930012
Phakomatosis pigmentokeratotica	hsa04720	Long-term potentiation	0.011927074459022	HRAS	0.0279634770930012
Phakomatosis pigmentokeratotica	hsa05211	Renal cell carcinoma	0.011927074459022	HRAS	0.0279634770930012
Phakomatosis pigmentokeratotica	hsa04730	Long-term depression	0.011927074459022	HRAS	0.0279634770930012
Phakomatosis pigmentokeratotica	hsa05218	Melanoma	0.0120974612370082	HRAS	0.0279634770930012
Phakomatosis pigmentokeratotica	hsa05220	Chronic myeloid leukemia	0.0124382347929801	HRAS	0.0279634770930012
Phakomatosis pigmentokeratotica	hsa04662	B cell receptor signaling pathway	0.0127790083489521	HRAS	0.0279634770930012
Phakomatosis pigmentokeratotica	hsa04370	VEGF signaling pathway	0.012949395126938	HRAS	0.0279634770930012
Phakomatosis pigmentokeratotica	hsa04664	Fc epsilon RI signaling pathway	0.0134605554608964	HRAS	0.0279634770930012
Phakomatosis pigmentokeratotica	hsa04012	ErbB signaling pathway	0.0148236496847843	HRAS	0.0279634770930012
Phakomatosis pigmentokeratotica	hsa05215	Prostate cancer	0.0151644232407567	HRAS	0.0279634770930012
Phakomatosis pigmentokeratotica	hsa04540	Gap junction	0.0153348100187426	HRAS	0.0279634770930012
Phakomatosis pigmentokeratotica	hsa04912	GnRH signaling pathway	0.0172090645765888	HRAS	0.0280351783163166
Phakomatosis pigmentokeratotica	hsa04916	Melanogenesis	0.0172090645765888	HRAS	0.0280351783163166
Phakomatosis pigmentokeratotica	hsa04660	T cell receptor signaling pathway	0.0184017720224912	HRAS	0.0280351783163166
Phakomatosis pigmentokeratotica	hsa04722	Neurotrophin signaling pathway	0.0216391208042256	HRAS	0.0280351783163166
Phakomatosis pigmentokeratotica	hsa04360	Axon guidance	0.0219798943601976	HRAS	0.0280351783163166
Phakomatosis pigmentokeratotica	hsa04530	Tight junction	0.0224910546941557	HRAS	0.0280351783163166
Phakomatosis pigmentokeratotica	hsa05160	Hepatitis C	0.0228318282501278	HRAS	0.0280351783163166
Phakomatosis pigmentokeratotica	hsa04650	Natural killer cell mediated cytotoxicity	0.0231726018060997	HRAS	0.0280351783163166
Phakomatosis pigmentokeratotica	hsa04910	Insulin signaling pathway	0.023513375362072	HRAS	0.0280351783163166
Phakomatosis pigmentokeratotica	hsa04062	Chemokine signaling pathway	0.0322031010393593	HRAS	0.0366096556424463
Phakomatosis pigmentokeratotica	hsa04510	Focal adhesion	0.0340773555972058	HRAS	0.0366096556424463
Phakomatosis pigmentokeratotica	hsa04144	Endocytosis	0.0342477423751917	HRAS	0.0366096556424463
Phakomatosis pigmentokeratotica	hsa04810	Regulation of actin cytoskeleton	0.0362923837110242	HRAS	0.037502129834725
Phakomatosis pigmentokeratotica	hsa04010	MAPK signaling pathway	0.0456636565002557	HRAS	0.0456636565002557
Thoracolumbosacral spina bifida aperta	hsa00670	One carbon pool by folate	5.31175384612342e-05	MTHFD1, MTHFR	0.000106235076922468
Thoracolumbosacral spina bifida aperta	hsa04310	Wnt signaling pathway	0.00376407289789034	VANGL2, VANGL1	0.00376407289789034
Perrault syndrome	hsa00970	Aminoacyl-tRNA biosynthesis	0.000337892473790004	HARS2, LARS2	0.00135156989516002
Perrault syndrome	hsa00290	Valine, leucine and isoleucine biosynthesis	0.00561318649467046	LARS2	0.0108769008257479
Perrault syndrome	hsa00120	Primary bile acid biosynthesis	0.00815767561931091	HSD17B4	0.0108769008257479
Perrault syndrome	hsa04146	Peroxisome	0.0398472440041747	HSD17B4	0.0398472440041747
Fuhrmann syndrome	hsa05217	Basal cell carcinoma	0.00937127278923144	WNT7A	0.0190833191344353
Fuhrmann syndrome	hsa04340	Hedgehog signaling pathway	0.00954165956721764	WNT7A	0.0190833191344353
Fuhrmann syndrome	hsa04916	Melanogenesis	0.0172090645765888	WNT7A	0.0229454194354517
Fuhrmann syndrome	hsa04310	Wnt signaling pathway	0.0255580166979043	WNT7A	0.0255580166979043
Lumbosacral spina bifida aperta	hsa00670	One carbon pool by folate	5.31175384612342e-05	MTHFD1, MTHFR	0.000106235076922468
Lumbosacral spina bifida aperta	hsa04310	Wnt signaling pathway	0.00376407289789034	VANGL2, VANGL1	0.00376407289789034
Cervical spina bifida aperta	hsa00670	One carbon pool by folate	5.31175384612342e-05	MTHFD1, MTHFR	0.000106235076922468
Cervical spina bifida aperta	hsa04310	Wnt signaling pathway	0.00376407289789034	VANGL2, VANGL1	0.00376407289789034
Peters anomaly	hsa04950	Maturity onset diabetes of the young	0.0127268107642596	PAX6	0.0423329679369964
Peters anomaly	hsa00380	Tryptophan metabolism	0.0213190718392827	CYP1B1	0.0423329679369964
Peters anomaly	hsa00140	Steroid hormone biosynthesis	0.0283575036440731	CYP1B1	0.0423329679369964
Peters anomaly	hsa00980	Metabolism of xenobiotics by cytochrome P450	0.0358611451900989	CYP1B1	0.0423329679369964
Peters anomaly	hsa04350	TGF-beta signaling pathway	0.0423329679369964	PITX2	0.0423329679369964
Cervicothoracic spina bifida aperta	hsa00670	One carbon pool by folate	5.31175384612342e-05	MTHFD1, MTHFR	0.000106235076922468
Cervicothoracic spina bifida aperta	hsa04310	Wnt signaling pathway	0.00376407289789034	VANGL2, VANGL1	0.00376407289789034
Fabry disease	hsa00603	Glycosphingolipid biosynthesis - globo series	0.00238541489180433	GLA	0.0106491736241267
Fabry disease	hsa00052	Galactose metabolism	0.00460044300562257	GLA	0.0106491736241267
Fabry disease	hsa00600	Sphingolipid metabolism	0.00681547111944103	GLA	0.0106491736241267
Fabry disease	hsa00561	Glycerolipid metabolism	0.00851933889930134	GLA	0.0106491736241267
Fabry disease	hsa04142	Lysosome	0.0206168001363094	GLA	0.0206168001363094
Alopecia-intellectual disability syndrome	hsa05412	Arrhythmogenic right ventricular cardiomyopathy (ARVC)	0.012608621570966	ITGB6	0.0230022150281139
Alopecia-intellectual disability syndrome	hsa05410	Hypertrophic cardiomyopathy (HCM)	0.0141421025728402	ITGB6	0.0230022150281139
Alopecia-intellectual disability syndrome	hsa04512	ECM-receptor interaction	0.0144828761288124	ITGB6	0.0230022150281139
Alopecia-intellectual disability syndrome	hsa05414	Dilated cardiomyopathy	0.0153348100187426	ITGB6	0.0230022150281139
Alopecia-intellectual disability syndrome	hsa04510	Focal adhesion	0.0340773555972058	ITGB6	0.0362923837110242
Alopecia-intellectual disability syndrome	hsa04810	Regulation of actin cytoskeleton	0.0362923837110242	ITGB6	0.0362923837110242
Total spina bifida aperta	hsa00670	One carbon pool by folate	5.31175384612342e-05	MTHFD1, MTHFR	0.000106235076922468
Total spina bifida aperta	hsa04310	Wnt signaling pathway	0.00376407289789034	VANGL1, VANGL2	0.00376407289789034
Intermediate maple syrup urine disease	hsa00280	Valine, leucine and isoleucine degradation	3.93278422839012e-07	BCKDHA, BCKDHB, DBT	7.86556845678023e-07
Intermediate maple syrup urine disease	hsa01100	Metabolic pathways	0.00712215108267904	BCKDHA, BCKDHB, DBT	0.00712215108267904
Classic maple syrup urine disease	hsa00280	Valine, leucine and isoleucine degradation	3.93278422839012e-07	BCKDHA, BCKDHB, DBT	7.86556845678023e-07
Classic maple syrup urine disease	hsa01100	Metabolic pathways	0.00712215108267904	BCKDHA, BCKDHB, DBT	0.00712215108267904
Thiamine-responsive maple syrup urine disease	hsa00280	Valine, leucine and isoleucine degradation	3.93278422839012e-07	BCKDHA, BCKDHB, DBT	7.86556845678023e-07
Thiamine-responsive maple syrup urine disease	hsa01100	Metabolic pathways	0.00712215108267904	BCKDHA, BCKDHB, DBT	0.00712215108267904
Wrinkly skin syndrome	hsa04966	Collecting duct acid secretion	0.00460044300562257	ATP6V0A2	0.0260691770318624
Wrinkly skin syndrome	hsa05110	Vibrio cholerae infection	0.00920088601124547	ATP6V0A2	0.0260691770318624
Wrinkly skin syndrome	hsa05120	Epithelial cell signaling in Helicobacter pylori infection	0.01158630090305	ATP6V0A2	0.0260691770318624
Wrinkly skin syndrome	hsa05323	Rheumatoid arthritis	0.0155051967967285	ATP6V0A2	0.0260691770318624
Wrinkly skin syndrome	hsa04142	Lysosome	0.0206168001363094	ATP6V0A2	0.0260691770318624
Wrinkly skin syndrome	hsa00190	Oxidative phosphorylation	0.0224910546941557	ATP6V0A2	0.0260691770318624
Wrinkly skin syndrome	hsa04145	Phagosome	0.0260691770318624	ATP6V0A2	0.0260691770318624
Intermittent maple syrup urine disease	hsa00280	Valine, leucine and isoleucine degradation	3.93278422839012e-07	BCKDHA, BCKDHB, DBT	7.86556845678023e-07
Intermittent maple syrup urine disease	hsa01100	Metabolic pathways	0.00712215108267904	BCKDHA, BCKDHB, DBT	0.00712215108267904
Proteus-like syndrome	hsa05213	Endometrial cancer	0.00886011245527352	PTEN	0.0189555290509459
Proteus-like syndrome	hsa00562	Inositol phosphate metabolism	0.00971204634520362	PTEN	0.0189555290509459
Proteus-like syndrome	hsa05214	Glioma	0.0110751405690919	PTEN	0.0189555290509459
Proteus-like syndrome	hsa04115	p53 signaling pathway	0.01158630090305	PTEN	0.0189555290509459
Proteus-like syndrome	hsa05218	Melanoma	0.0120974612370082	PTEN	0.0189555290509459
Proteus-like syndrome	hsa04070	Phosphatidylinositol signaling system	0.0132901686829102	PTEN	0.0189555290509459
Proteus-like syndrome	hsa05222	Small cell lung cancer	0.0144828761288124	PTEN	0.0189555290509459
Proteus-like syndrome	hsa05215	Prostate cancer	0.0151644232407567	PTEN	0.0189555290509459
Proteus-like syndrome	hsa04530	Tight junction	0.0224910546941557	PTEN	0.0249900607712841
Proteus-like syndrome	hsa04510	Focal adhesion	0.0340773555972058	PTEN	0.0340773555972058
Pseudoachondroplasia	hsa05144	Malaria	0.00868972567728732	COMP	0.024138126881354
Pseudoachondroplasia	hsa04350	TGF-beta signaling pathway	0.0143124893508263	COMP	0.024138126881354
Pseudoachondroplasia	hsa04512	ECM-receptor interaction	0.0144828761288124	COMP	0.024138126881354
Pseudoachondroplasia	hsa04145	Phagosome	0.0260691770318624	COMP	0.032586471289828
Pseudoachondroplasia	hsa04510	Focal adhesion	0.0340773555972058	COMP	0.0340773555972058
Renal agenesis, bilateral	hsa04810	Regulation of actin cytoskeleton	0.00383922036962474	ITGA8, FGF20	0.030713762956998
Renal agenesis, bilateral	hsa05200	Pathways in cancer	0.00888949766432845	FGF20, RET	0.0355579906573138
Renal agenesis, bilateral	hsa05216	Thyroid cancer	0.0147530250283059	RET	0.0393414000754824
Renal agenesis, bilateral	hsa05218	Melanoma	0.0358611451900989	FGF20	0.0453101690700749
Renal agenesis, bilateral	hsa05412	Arrhythmogenic right ventricular cardiomyopathy (ARVC)	0.0373572224860503	ITGA8	0.0453101690700749
Renal agenesis, bilateral	hsa05410	Hypertrophic cardiomyopathy (HCM)	0.0418361667790873	ITGA8	0.0453101690700749
Renal agenesis, bilateral	hsa04512	ECM-receptor interaction	0.0428295973399678	ITGA8	0.0453101690700749
Renal agenesis, bilateral	hsa05414	Dilated cardiomyopathy	0.0453101690700749	ITGA8	0.0453101690700749
Triphalangeal thumb-polysyndactyly syndrome	hsa05217	Basal cell carcinoma	0.00937127278923144	SHH	0.00954165956721764
Triphalangeal thumb-polysyndactyly syndrome	hsa04340	Hedgehog signaling pathway	0.00954165956721764	SHH	0.00954165956721764
Hutchinson-Gilford progeria syndrome	hsa05412	Arrhythmogenic right ventricular cardiomyopathy (ARVC)	0.012608621570966	LMNA	0.0153348100187426
Hutchinson-Gilford progeria syndrome	hsa05410	Hypertrophic cardiomyopathy (HCM)	0.0141421025728402	LMNA	0.0153348100187426
Hutchinson-Gilford progeria syndrome	hsa05414	Dilated cardiomyopathy	0.0153348100187426	LMNA	0.0153348100187426
Isolated polycystic liver disease	hsa04141	Protein processing in endoplasmic reticulum	0.00231353218385632	PRKCSH, SEC63	0.00462706436771264
Isolated polycystic liver disease	hsa03060	Protein export	0.0117126627094161	SEC63	0.0117126627094161
Glycogen storage disease due to liver phosphorylase kinase deficiency	hsa04910	Insulin signaling pathway	0.000548965989196294	PHKA2, PHKG2	0.000904548211966728
Glycogen storage disease due to liver phosphorylase kinase deficiency	hsa04020	Calcium signaling pathway	0.000904548211966728	PHKA2, PHKG2	0.000904548211966728
Hereditary pulmonary alveolar proteinosis	hsa04630	Jak-STAT signaling pathway	0.00204316143423471	CSF2RB, CSF2RA	0.00817264573693884
Hereditary pulmonary alveolar proteinosis	hsa04060	Cytokine-cytokine receptor interaction	0.00591207874931453	CSF2RB, CSF2RA	0.0118241574986291
Hereditary pulmonary alveolar proteinosis	hsa04210	Apoptosis	0.0438223409998761	CSF2RB	0.0443184553162026
Hereditary pulmonary alveolar proteinosis	hsa04640	Hematopoietic cell lineage	0.0443184553162026	CSF2RA	0.0443184553162026
Trismus-pseudocamptodactyly syndrome	hsa05416	Viral myocarditis	0.011927074459022	MYH8	0.0224910546941557
Trismus-pseudocamptodactyly syndrome	hsa04530	Tight junction	0.0224910546941557	MYH8	0.0224910546941557
Heritable pulmonary arterial hypertension	hsa04350	TGF-beta signaling pathway	0.001192140783932	BMPR2, SMAD9	0.00357642235179601
Heritable pulmonary arterial hypertension	hsa05416	Viral myocarditis	0.0468733005382516	CAV1	0.0468733005382516
Heritable pulmonary arterial hypertension	hsa05100	Bacterial invasion of epithelial cells	0.0468733005382516	CAV1	0.0468733005382516
Drug- or toxin-induced pulmonary arterial hypertension	hsa04350	TGF-beta signaling pathway	0.0143124893508263	BMPR2	0.0286249787016526
Drug- or toxin-induced pulmonary arterial hypertension	hsa04060	Cytokine-cytokine receptor interaction	0.0451524961662976	BMPR2	0.0451524961662976
Isolated trigonocephaly	hsa05218	Melanoma	0.0120974612370082	FGFR1	0.0252740387345946
Isolated trigonocephaly	hsa04520	Adherens junction	0.0124382347929801	FGFR1	0.0252740387345946
Isolated trigonocephaly	hsa05215	Prostate cancer	0.0151644232407567	FGFR1	0.0252740387345946
Isolated trigonocephaly	hsa04810	Regulation of actin cytoskeleton	0.0362923837110242	FGFR1	0.0453654796387802
Isolated trigonocephaly	hsa04010	MAPK signaling pathway	0.0456636565002557	FGFR1	0.0456636565002557
Juvenile myoclonic epilepsy	hsa04080	Neuroactive ligand-receptor interaction	0.0062240399987242	GABRA1, GABRD	0.031120199993621
Juvenile myoclonic epilepsy	hsa05412	Arrhythmogenic right ventricular cardiomyopathy (ARVC)	0.0373572224860503	CACNB4	0.0453101690700749
Juvenile myoclonic epilepsy	hsa04260	Cardiac muscle contraction	0.0388517513150249	CACNB4	0.0453101690700749
Juvenile myoclonic epilepsy	hsa05410	Hypertrophic cardiomyopathy (HCM)	0.0418361667790873	CACNB4	0.0453101690700749
Juvenile myoclonic epilepsy	hsa05414	Dilated cardiomyopathy	0.0453101690700749	CACNB4	0.0453101690700749
Multiple endocrine neoplasia type 4	hsa05220	Chronic myeloid leukemia	0.0124382347929801	CDKN1B	0.0189555290509459
Multiple endocrine neoplasia type 4	hsa05222	Small cell lung cancer	0.0144828761288124	CDKN1B	0.0189555290509459
Multiple endocrine neoplasia type 4	hsa04012	ErbB signaling pathway	0.0148236496847843	CDKN1B	0.0189555290509459
Multiple endocrine neoplasia type 4	hsa05215	Prostate cancer	0.0151644232407567	CDKN1B	0.0189555290509459
Multiple endocrine neoplasia type 4	hsa04110	Cell cycle	0.0211279604702675	CDKN1B	0.0211279604702675
Bile acid CoA ligase deficiency and defective amidation	hsa00120	Primary bile acid biosynthesis	0.0027261884477765	SLC27A5	0.0081785653433295
Bile acid CoA ligase deficiency and defective amidation	hsa03320	PPAR signaling pathway	0.011927074459022	SLC27A5	0.0120974612370082
Bile acid CoA ligase deficiency and defective amidation	hsa04976	Bile secretion	0.0120974612370082	SLC27A5	0.0120974612370082
Frontotemporal dementia with motor neuron disease	hsa04623	Cytosolic DNA-sensing pathway	0.0283575036440731	TBK1	0.0358611451900989
Frontotemporal dementia with motor neuron disease	hsa04622	RIG-I-like receptor signaling pathway	0.0358611451900989	TBK1	0.0358611451900989
Behavioral variant of frontotemporal dementia	hsa04380	Osteoclast differentiation	0.00668441223659739	TREM2, SQSTM1	0.0167952462353081
Behavioral variant of frontotemporal dementia	hsa05010	Alzheimer's disease	0.0111968308235387	PSEN1, MAPT	0.0167952462353081
Behavioral variant of frontotemporal dementia	hsa04330	Notch signaling pathway	0.0471169904225509	PSEN1	0.0471169904225509
Hypoplastic tibiae-postaxial polydactyly syndrome	hsa05217	Basal cell carcinoma	0.00937127278923144	SHH	0.00954165956721764
Hypoplastic tibiae-postaxial polydactyly syndrome	hsa04340	Hedgehog signaling pathway	0.00954165956721764	SHH	0.00954165956721764
Hoyeraal-Hreidarsson syndrome	hsa03018	RNA degradation	0.0240506105642356	PARN	0.0270783731558707
Hoyeraal-Hreidarsson syndrome	hsa03008	Ribosome biogenesis in eukaryotes	0.0270783731558707	DKC1	0.0270783731558707
Preeclampsia	hsa05323	Rheumatoid arthritis	0.0155051967967285	FLT1	0.0451524961662976
Preeclampsia	hsa04510	Focal adhesion	0.0340773555972058	FLT1	0.0451524961662976
Preeclampsia	hsa04144	Endocytosis	0.0342477423751917	FLT1	0.0451524961662976
Preeclampsia	hsa04060	Cytokine-cytokine receptor interaction	0.0451524961662976	FLT1	0.0451524961662976
Autoimmune lymphoproliferative syndrome with recurrent viral infections	hsa04621	NOD-like receptor signaling pathway	0.0098824331231897	CASP8	0.025314607015067
Autoimmune lymphoproliferative syndrome with recurrent viral infections	hsa04115	p53 signaling pathway	0.01158630090305	CASP8	0.025314607015067
Autoimmune lymphoproliferative syndrome with recurrent viral infections	hsa05416	Viral myocarditis	0.011927074459022	CASP8	0.025314607015067
Autoimmune lymphoproliferative syndrome with recurrent viral infections	hsa04622	RIG-I-like receptor signaling pathway	0.0120974612370082	CASP8	0.025314607015067
Autoimmune lymphoproliferative syndrome with recurrent viral infections	hsa04210	Apoptosis	0.0148236496847843	CASP8	0.025314607015067
Autoimmune lymphoproliferative syndrome with recurrent viral infections	hsa04620	Toll-like receptor signaling pathway	0.0173794513545749	CASP8	0.025314607015067
Autoimmune lymphoproliferative syndrome with recurrent viral infections	hsa05142	Chagas disease (American trypanosomiasis)	0.0177202249105469	CASP8	0.025314607015067
Autoimmune lymphoproliferative syndrome with recurrent viral infections	hsa05145	Toxoplasmosis	0.0224910546941557	CASP8	0.0281138183676946
Autoimmune lymphoproliferative syndrome with recurrent viral infections	hsa05010	Alzheimer's disease	0.0284545919236666	CASP8	0.0311807803714431
Autoimmune lymphoproliferative syndrome with recurrent viral infections	hsa05016	Huntington's disease	0.0311807803714431	CASP8	0.0311807803714431
Congenital amegakaryocytic thrombocytopenia	hsa04630	Jak-STAT signaling pathway	0.0264099505878344	MPL	0.0451524961662976
Congenital amegakaryocytic thrombocytopenia	hsa04060	Cytokine-cytokine receptor interaction	0.0451524961662976	MPL	0.0451524961662976
Zimmermann-Laband syndrome	hsa04966	Collecting duct acid secretion	0.00460044300562257	ATP6V1B2	0.0231726018061
Zimmermann-Laband syndrome	hsa05110	Vibrio cholerae infection	0.00920088601124547	ATP6V1B2	0.0231726018061
Zimmermann-Laband syndrome	hsa05120	Epithelial cell signaling in Helicobacter pylori infection	0.01158630090305	ATP6V1B2	0.0231726018061
Zimmermann-Laband syndrome	hsa05323	Rheumatoid arthritis	0.0155051967967285	ATP6V1B2	0.0232577951950927
Zimmermann-Laband syndrome	hsa00190	Oxidative phosphorylation	0.0224910546941557	ATP6V1B2	0.0260691770318624
Zimmermann-Laband syndrome	hsa04145	Phagosome	0.0260691770318624	ATP6V1B2	0.0260691770318624
Von Hippel-Lindau disease	hsa05211	Renal cell carcinoma	0.011927074459022	VHL	0.0230022150281138
Von Hippel-Lindau disease	hsa04120	Ubiquitin mediated proteolysis	0.0230022150281138	VHL	0.0230022150281138
Baraitser-Winter cerebrofrontofacial syndrome	hsa05110	Vibrio cholerae infection	8.31027536803021e-05	ACTB, ACTG1	0.00033611940354971
Baraitser-Winter cerebrofrontofacial syndrome	hsa05130	Pathogenic Escherichia coli infection	8.94327328215692e-05	ACTB, ACTG1	0.00033611940354971
Baraitser-Winter cerebrofrontofacial syndrome	hsa05131	Shigellosis	0.000106273961729527	ACTB, ACTG1	0.00033611940354971
Baraitser-Winter cerebrofrontofacial syndrome	hsa05416	Viral myocarditis	0.000140246785561097	ACTB, ACTG1	0.00033611940354971
Baraitser-Winter cerebrofrontofacial syndrome	hsa05100	Bacterial invasion of epithelial cells	0.000140246785561097	ACTB, ACTG1	0.00033611940354971
Baraitser-Winter cerebrofrontofacial syndrome	hsa04520	Adherens junction	0.000152616377827976	ACTB, ACTG1	0.00033611940354971
Baraitser-Winter cerebrofrontofacial syndrome	hsa05412	Arrhythmogenic right ventricular cardiomyopathy (ARVC)	0.000156855721656531	ACTB, ACTG1	0.00033611940354971
Baraitser-Winter cerebrofrontofacial syndrome	hsa05410	Hypertrophic cardiomyopathy (HCM)	0.000197623110254415	ACTB, ACTG1	0.000370543331727029
Baraitser-Winter cerebrofrontofacial syndrome	hsa05414	Dilated cardiomyopathy	0.00023258317853921	ACTB, ACTG1	0.000387638630898684
Baraitser-Winter cerebrofrontofacial syndrome	hsa04670	Leukocyte transendothelial migration	0.00038734826488303	ACTB, ACTG1	0.000581022397324544
Baraitser-Winter cerebrofrontofacial syndrome	hsa04530	Tight junction	0.000502100914269666	ACTB, ACTG1	0.000684683064913181
Baraitser-Winter cerebrofrontofacial syndrome	hsa04145	Phagosome	0.000675275206005977	ACTB, ACTG1	0.000844094007507471
Baraitser-Winter cerebrofrontofacial syndrome	hsa04510	Focal adhesion	0.00115565674230469	ACTB, ACTG1	0.00133345008727464
Baraitser-Winter cerebrofrontofacial syndrome	hsa04810	Regulation of actin cytoskeleton	0.00131117678028921	ACTB, ACTG1	0.00140483226459558
Baraitser-Winter cerebrofrontofacial syndrome	hsa04971	Gastric acid secretion	0.0250603874202756	ACTB	0.0250603874202756
Isolated focal cortical dysplasia type IIb	hsa04150	mTOR signaling pathway	6.56255900388264e-07	TSC2, MTOR, TSC1	5.90630310349437e-06
Isolated focal cortical dysplasia type IIb	hsa04910	Insulin signaling pathway	1.27253067207595e-05	TSC2, MTOR, TSC1	5.72638802434176e-05
Isolated focal cortical dysplasia type IIb	hsa04930	Type II diabetes mellitus	0.0243396899124961	MTOR	0.044181666804099
Isolated focal cortical dysplasia type IIb	hsa05221	Acute myeloid leukemia	0.0288589534099545	MTOR	0.044181666804099
Isolated focal cortical dysplasia type IIb	hsa05214	Glioma	0.032864341990224	MTOR	0.044181666804099
Isolated focal cortical dysplasia type IIb	hsa04920	Adipocytokine signaling pathway	0.0343635186254103	MTOR	0.044181666804099
Isolated focal cortical dysplasia type IIb	hsa04115	p53 signaling pathway	0.0343635186254103	TSC2	0.044181666804099
Isolated focal cortical dysplasia type IIb	hsa04012	ErbB signaling pathway	0.0438223409998761	MTOR	0.0448143979963705
Isolated focal cortical dysplasia type IIb	hsa05215	Prostate cancer	0.0448143979963705	MTOR	0.0448143979963705
Isolated focal cortical dysplasia type IIa	hsa04150	mTOR signaling pathway	7.70050673515587e-05	TSC2, MTOR	0.000693045606164029
Isolated focal cortical dysplasia type IIa	hsa04910	Insulin signaling pathway	0.000548965989196294	TSC2, MTOR	0.00247034695138332
Isolated focal cortical dysplasia type IIa	hsa04930	Type II diabetes mellitus	0.0162916241135271	MTOR	0.0296232570634727
Isolated focal cortical dysplasia type IIa	hsa05221	Acute myeloid leukemia	0.0193314078582104	MTOR	0.0296232570634727
Isolated focal cortical dysplasia type IIa	hsa05214	Glioma	0.0220294888756714	MTOR	0.0296232570634727
Isolated focal cortical dysplasia type IIa	hsa04920	Adipocytokine signaling pathway	0.0230403110493677	MTOR	0.0296232570634727
Isolated focal cortical dysplasia type IIa	hsa04115	p53 signaling pathway	0.0230403110493677	TSC2	0.0296232570634727
Isolated focal cortical dysplasia type IIa	hsa04012	ErbB signaling pathway	0.029430047516656	MTOR	0.0301014318180526
Isolated focal cortical dysplasia type IIa	hsa05215	Prostate cancer	0.0301014318180526	MTOR	0.0301014318180526
Autoimmune polyendocrinopathy type 1	hsa05340	Primary immunodeficiency	0.00596353722951104	AIRE	0.0119270744590221
Autoimmune polyendocrinopathy type 1	hsa04120	Ubiquitin mediated proteolysis	0.0230022150281138	AIRE	0.0230022150281138
Wiedemann-Rautenstrauch syndrome	hsa03020	RNA polymerase	0.00494121656159496	POLR3A	0.0190833191344353
Wiedemann-Rautenstrauch syndrome	hsa04623	Cytosolic DNA-sensing pathway	0.00954165956721764	POLR3A	0.0190833191344353
Wiedemann-Rautenstrauch syndrome	hsa00240	Pyrimidine metabolism	0.0168682910206168	POLR3A	0.0224910546941558
Wiedemann-Rautenstrauch syndrome	hsa00230	Purine metabolism	0.0276026580337366	POLR3A	0.0276026580337366
Spondyloperipheral dysplasia-short ulna syndrome	hsa04974	Protein digestion and absorption	0.0138013290168684	COL2A1	0.0240813312886921
Spondyloperipheral dysplasia-short ulna syndrome	hsa04512	ECM-receptor interaction	0.0144828761288124	COL2A1	0.0240813312886921
Spondyloperipheral dysplasia-short ulna syndrome	hsa05146	Amoebiasis	0.0180609984665191	COL2A1	0.0240813312886921
Spondyloperipheral dysplasia-short ulna syndrome	hsa04510	Focal adhesion	0.0340773555972058	COL2A1	0.0340773555972058
Alpha-dystroglycan-related limb-girdle muscular dystrophy R16	hsa05416	Viral myocarditis	0.011927074459022	DAG1	0.0153348100187426
Alpha-dystroglycan-related limb-girdle muscular dystrophy R16	hsa05412	Arrhythmogenic right ventricular cardiomyopathy (ARVC)	0.012608621570966	DAG1	0.0153348100187426
Alpha-dystroglycan-related limb-girdle muscular dystrophy R16	hsa05410	Hypertrophic cardiomyopathy (HCM)	0.0141421025728402	DAG1	0.0153348100187426
Alpha-dystroglycan-related limb-girdle muscular dystrophy R16	hsa04512	ECM-receptor interaction	0.0144828761288124	DAG1	0.0153348100187426
Alpha-dystroglycan-related limb-girdle muscular dystrophy R16	hsa05414	Dilated cardiomyopathy	0.0153348100187426	DAG1	0.0153348100187426
Pelizaeus-Merzbacher-like disease due to HSPD1 mutation	hsa04940	Type I diabetes mellitus	0.00732663145339929	HSPD1	0.0120974612370082
Pelizaeus-Merzbacher-like disease due to HSPD1 mutation	hsa03018	RNA degradation	0.0120974612370082	HSPD1	0.0120974612370082
Familial advanced sleep-phase syndrome	hsa04710	Circadian rhythm	4.57300491673269e-08	PER3, CSNK1D, PER2	1.37190147501981e-07
Familial advanced sleep-phase syndrome	hsa04340	Hedgehog signaling pathway	0.0283575036440731	CSNK1D	0.0425362554661096
Familial advanced sleep-phase syndrome	hsa04540	Gap junction	0.0453101690700749	CSNK1D	0.0453101690700749
Autosomal semi-dominant severe lipodystrophic laminopathy	hsa05412	Arrhythmogenic right ventricular cardiomyopathy (ARVC)	0.012608621570966	LMNA	0.0153348100187426
Autosomal semi-dominant severe lipodystrophic laminopathy	hsa05410	Hypertrophic cardiomyopathy (HCM)	0.0141421025728402	LMNA	0.0153348100187426
Autosomal semi-dominant severe lipodystrophic laminopathy	hsa05414	Dilated cardiomyopathy	0.0153348100187426	LMNA	0.0153348100187426
Hereditary neutrophilia	hsa04640	Hematopoietic cell lineage	0.0149940364627703	CSF3R	0.0396149258817515
Hereditary neutrophilia	hsa04630	Jak-STAT signaling pathway	0.0264099505878344	CSF3R	0.0396149258817515
Hereditary neutrophilia	hsa04060	Cytokine-cytokine receptor interaction	0.0451524961662976	CSF3R	0.0451524961662976
Severe combined immunodeficiency due to LCK deficiency	hsa05340	Primary immunodeficiency	0.00596353722951104	LCK	0.0231726018060997
Severe combined immunodeficiency due to LCK deficiency	hsa04660	T cell receptor signaling pathway	0.0184017720224912	LCK	0.0231726018060997
Severe combined immunodeficiency due to LCK deficiency	hsa04380	Osteoclast differentiation	0.0218095075822118	LCK	0.0231726018060997
Severe combined immunodeficiency due to LCK deficiency	hsa04650	Natural killer cell mediated cytotoxicity	0.0231726018060997	LCK	0.0231726018060997
Complement component 3 deficiency	hsa05150	Staphylococcus aureus infection	0.00937127278923144	C3	0.0245356960299881
Complement component 3 deficiency	hsa04610	Complement and coagulation cascades	0.0117566876810358	C3	0.0245356960299881
Complement component 3 deficiency	hsa05140	Leishmaniasis	0.012267848014994	C3	0.0245356960299881
Complement component 3 deficiency	hsa05142	Chagas disease (American trypanosomiasis)	0.0177202249105469	C3	0.0260691770318624
Complement component 3 deficiency	hsa05322	Systemic lupus erythematosus	0.0231726018060997	C3	0.0260691770318624
Complement component 3 deficiency	hsa04145	Phagosome	0.0260691770318624	C3	0.0260691770318624
SHORT syndrome	hsa04960	Aldosterone-regulated sodium reabsorption	0.0071562446754132	PIK3R1	0.0256310396027555
SHORT syndrome	hsa04973	Carbohydrate digestion and absorption	0.00749701823138538	PIK3R1	0.0256310396027555
SHORT syndrome	hsa04930	Type II diabetes mellitus	0.00817856534332939	PIK3R1	0.0256310396027555
SHORT syndrome	hsa04150	mTOR signaling pathway	0.00886011245527352	PIK3R1	0.0256310396027555
SHORT syndrome	hsa05213	Endometrial cancer	0.00886011245527352	PIK3R1	0.0256310396027555
SHORT syndrome	hsa05223	Non-small cell lung cancer	0.00920088601124547	PIK3R1	0.0256310396027555
SHORT syndrome	hsa05221	Acute myeloid leukemia	0.00971204634520362	PIK3R1	0.0256310396027555
SHORT syndrome	hsa05210	Colorectal cancer	0.0105639802351337	PIK3R1	0.0256310396027555
SHORT syndrome	hsa05214	Glioma	0.0110751405690919	PIK3R1	0.0256310396027555
SHORT syndrome	hsa05100	Bacterial invasion of epithelial cells	0.011927074459022	PIK3R1	0.0256310396027555
SHORT syndrome	hsa05211	Renal cell carcinoma	0.011927074459022	PIK3R1	0.0256310396027555
SHORT syndrome	hsa05212	Pancreatic cancer	0.011927074459022	PIK3R1	0.0256310396027555
SHORT syndrome	hsa05218	Melanoma	0.0120974612370082	PIK3R1	0.0256310396027555
SHORT syndrome	hsa05220	Chronic myeloid leukemia	0.0124382347929801	PIK3R1	0.0256310396027555
SHORT syndrome	hsa04662	B cell receptor signaling pathway	0.0127790083489521	PIK3R1	0.0256310396027555
SHORT syndrome	hsa04370	VEGF signaling pathway	0.012949395126938	PIK3R1	0.0256310396027555
SHORT syndrome	hsa04070	Phosphatidylinositol signaling system	0.0132901686829102	PIK3R1	0.0256310396027555
SHORT syndrome	hsa04664	Fc epsilon RI signaling pathway	0.0134605554608964	PIK3R1	0.0256310396027555
SHORT syndrome	hsa05222	Small cell lung cancer	0.0144828761288124	PIK3R1	0.0256310396027555
SHORT syndrome	hsa04914	Progesterone-mediated oocyte maturation	0.0146532629067984	PIK3R1	0.0256310396027555
SHORT syndrome	hsa04012	ErbB signaling pathway	0.0148236496847843	PIK3R1	0.0256310396027555
SHORT syndrome	hsa04210	Apoptosis	0.0148236496847843	PIK3R1	0.0256310396027555
SHORT syndrome	hsa05215	Prostate cancer	0.0151644232407567	PIK3R1	0.0256310396027555
SHORT syndrome	hsa04666	Fc gamma R-mediated phagocytosis	0.0160163571306866	PIK3R1	0.0256310396027555
SHORT syndrome	hsa04620	Toll-like receptor signaling pathway	0.0173794513545749	PIK3R1	0.0256310396027555
SHORT syndrome	hsa05142	Chagas disease (American trypanosomiasis)	0.0177202249105469	PIK3R1	0.0256310396027555
SHORT syndrome	hsa05146	Amoebiasis	0.0180609984665191	PIK3R1	0.0256310396027555
SHORT syndrome	hsa04660	T cell receptor signaling pathway	0.0184017720224912	PIK3R1	0.0256310396027555
SHORT syndrome	hsa04670	Leukocyte transendothelial migration	0.0197648662463792	PIK3R1	0.0262006182605945
SHORT syndrome	hsa04722	Neurotrophin signaling pathway	0.0216391208042256	PIK3R1	0.0262006182605945
SHORT syndrome	hsa04380	Osteoclast differentiation	0.0218095075822118	PIK3R1	0.0262006182605945
SHORT syndrome	hsa05145	Toxoplasmosis	0.0224910546941557	PIK3R1	0.0262006182605945
SHORT syndrome	hsa05160	Hepatitis C	0.0228318282501278	PIK3R1	0.0262006182605945
SHORT syndrome	hsa04650	Natural killer cell mediated cytotoxicity	0.0231726018060997	PIK3R1	0.0262006182605945
SHORT syndrome	hsa04910	Insulin signaling pathway	0.023513375362072	PIK3R1	0.0262006182605945
SHORT syndrome	hsa04630	Jak-STAT signaling pathway	0.0264099505878344	PIK3R1	0.0286107798034872
SHORT syndrome	hsa04062	Chemokine signaling pathway	0.0322031010393593	PIK3R1	0.033943809203649
SHORT syndrome	hsa04510	Focal adhesion	0.0340773555972058	PIK3R1	0.0349741281129218
SHORT syndrome	hsa04810	Regulation of actin cytoskeleton	0.0362923837110242	PIK3R1	0.0362923837110242
Thyroid carcinoma, follicular, somatic, 188470 (3)	hsa05216	Thyroid cancer	0.00494121656159496	HRAS	0.0279634770930012
Thyroid carcinoma, follicular, somatic, 188470 (3)	hsa05219	Bladder cancer	0.0071562446754132	HRAS	0.0279634770930012
Thyroid carcinoma, follicular, somatic, 188470 (3)	hsa05213	Endometrial cancer	0.00886011245527352	HRAS	0.0279634770930012
Thyroid carcinoma, follicular, somatic, 188470 (3)	hsa05223	Non-small cell lung cancer	0.00920088601124547	HRAS	0.0279634770930012
Thyroid carcinoma, follicular, somatic, 188470 (3)	hsa05221	Acute myeloid leukemia	0.00971204634520362	HRAS	0.0279634770930012
Thyroid carcinoma, follicular, somatic, 188470 (3)	hsa05214	Glioma	0.0110751405690919	HRAS	0.0279634770930012
Thyroid carcinoma, follicular, somatic, 188470 (3)	hsa04720	Long-term potentiation	0.011927074459022	HRAS	0.0279634770930012
Thyroid carcinoma, follicular, somatic, 188470 (3)	hsa05211	Renal cell carcinoma	0.011927074459022	HRAS	0.0279634770930012
Thyroid carcinoma, follicular, somatic, 188470 (3)	hsa04730	Long-term depression	0.011927074459022	HRAS	0.0279634770930012
Thyroid carcinoma, follicular, somatic, 188470 (3)	hsa05218	Melanoma	0.0120974612370082	HRAS	0.0279634770930012
Thyroid carcinoma, follicular, somatic, 188470 (3)	hsa05220	Chronic myeloid leukemia	0.0124382347929801	HRAS	0.0279634770930012
Thyroid carcinoma, follicular, somatic, 188470 (3)	hsa04662	B cell receptor signaling pathway	0.0127790083489521	HRAS	0.0279634770930012
Thyroid carcinoma, follicular, somatic, 188470 (3)	hsa04370	VEGF signaling pathway	0.012949395126938	HRAS	0.0279634770930012
Thyroid carcinoma, follicular, somatic, 188470 (3)	hsa04664	Fc epsilon RI signaling pathway	0.0134605554608964	HRAS	0.0279634770930012
Thyroid carcinoma, follicular, somatic, 188470 (3)	hsa04012	ErbB signaling pathway	0.0148236496847843	HRAS	0.0279634770930012
Thyroid carcinoma, follicular, somatic, 188470 (3)	hsa05215	Prostate cancer	0.0151644232407567	HRAS	0.0279634770930012
Thyroid carcinoma, follicular, somatic, 188470 (3)	hsa04540	Gap junction	0.0153348100187426	HRAS	0.0279634770930012
Thyroid carcinoma, follicular, somatic, 188470 (3)	hsa04912	GnRH signaling pathway	0.0172090645765888	HRAS	0.0280351783163166
Thyroid carcinoma, follicular, somatic, 188470 (3)	hsa04916	Melanogenesis	0.0172090645765888	HRAS	0.0280351783163166
Thyroid carcinoma, follicular, somatic, 188470 (3)	hsa04660	T cell receptor signaling pathway	0.0184017720224912	HRAS	0.0280351783163166
Thyroid carcinoma, follicular, somatic, 188470 (3)	hsa04722	Neurotrophin signaling pathway	0.0216391208042256	HRAS	0.0280351783163166
Thyroid carcinoma, follicular, somatic, 188470 (3)	hsa04360	Axon guidance	0.0219798943601976	HRAS	0.0280351783163166
Thyroid carcinoma, follicular, somatic, 188470 (3)	hsa04530	Tight junction	0.0224910546941557	HRAS	0.0280351783163166
Thyroid carcinoma, follicular, somatic, 188470 (3)	hsa05160	Hepatitis C	0.0228318282501278	HRAS	0.0280351783163166
Thyroid carcinoma, follicular, somatic, 188470 (3)	hsa04650	Natural killer cell mediated cytotoxicity	0.0231726018060997	HRAS	0.0280351783163166
Thyroid carcinoma, follicular, somatic, 188470 (3)	hsa04910	Insulin signaling pathway	0.023513375362072	HRAS	0.0280351783163166
Thyroid carcinoma, follicular, somatic, 188470 (3)	hsa04062	Chemokine signaling pathway	0.0322031010393593	HRAS	0.0366096556424463
Thyroid carcinoma, follicular, somatic, 188470 (3)	hsa04510	Focal adhesion	0.0340773555972058	HRAS	0.0366096556424463
Thyroid carcinoma, follicular, somatic, 188470 (3)	hsa04144	Endocytosis	0.0342477423751917	HRAS	0.0366096556424463
Thyroid carcinoma, follicular, somatic, 188470 (3)	hsa04810	Regulation of actin cytoskeleton	0.0362923837110242	HRAS	0.037502129834725
Thyroid carcinoma, follicular, somatic, 188470 (3)	hsa04010	MAPK signaling pathway	0.0456636565002557	HRAS	0.0456636565002557
Septo-optic dysplasia spectrum	hsa05200	Pathways in cancer	0.00307642793585884	FGFR1, ARNT2	0.0153821396792942
Septo-optic dysplasia spectrum	hsa05211	Renal cell carcinoma	0.0237139021324828	ARNT2	0.0301014318180526
Septo-optic dysplasia spectrum	hsa05218	Melanoma	0.0240506105642356	FGFR1	0.0301014318180526
Septo-optic dysplasia spectrum	hsa04520	Adherens junction	0.0247238532081322	FGFR1	0.0301014318180526
Septo-optic dysplasia spectrum	hsa05215	Prostate cancer	0.0301014318180526	FGFR1	0.0301014318180526
Microform holoprosencephaly	hsa04340	Hedgehog signaling pathway	1.16948298978004e-10	PTCH1, ZIC2, GLI2, GAS1, SHH, SUFU	5.84741494890022e-10
Microform holoprosencephaly	hsa05217	Basal cell carcinoma	1.39078199791578e-06	PTCH1, GLI2, SHH, SUFU	3.47695499478945e-06
Microform holoprosencephaly	hsa05200	Pathways in cancer	4.87567872934369e-06	FGFR1, PTCH1, GLI2, FGF8, SHH, SUFU	8.12613121557282e-06
Microform holoprosencephaly	hsa05218	Melanoma	0.00609887689085371	FGFR1, FGF8	0.00762359611356714
Microform holoprosencephaly	hsa04810	Regulation of actin cytoskeleton	0.0486908271671533	FGFR1, FGF8	0.0486908271671533
Septopreoptic holoprosencephaly	hsa04340	Hedgehog signaling pathway	3.6128901402933e-09	PTCH1, SHH, ZIC2, GLI2, GAS1	1.08386704208799e-08
Septopreoptic holoprosencephaly	hsa05217	Basal cell carcinoma	4.21962523560361e-05	PTCH1, SHH, GLI2	6.32943785340541e-05
Septopreoptic holoprosencephaly	hsa05200	Pathways in cancer	0.000547421871284378	PTCH1, SHH, GLI2, FGF8	0.000547421871284378
Amyotrophic lateral sclerosis	hsa05014	Amyotrophic lateral sclerosis (ALS)	0.000608468751502156	SOD1, NEFH, PRPH	0.00243387500600862
Amyotrophic lateral sclerosis	hsa00472	D-Arginine and D-ornithine metabolism	0.0032373487817341	DAO	0.00647469756346819
Amyotrophic lateral sclerosis	hsa05016	Huntington's disease	0.0200024013519015	SOD1, DCTN1, PPARGC1A	0.0263813603424589
Amyotrophic lateral sclerosis	hsa04146	Peroxisome	0.0263813603424589	DAO, SOD1	0.0263813603424589
Spondyloenchondrodysplasia	hsa00740	Riboflavin metabolism	0.0018742545578464	ACP5	0.0074970182313856
Spondyloenchondrodysplasia	hsa05323	Rheumatoid arthritis	0.0155051967967285	ACP5	0.0218095075822118
Spondyloenchondrodysplasia	hsa04142	Lysosome	0.0206168001363094	ACP5	0.0218095075822118
Spondyloenchondrodysplasia	hsa04380	Osteoclast differentiation	0.0218095075822118	ACP5	0.0218095075822118
Cenani-Lenz syndrome	hsa05213	Endometrial cancer	0.00886011245527352	APC	0.0176066337252229
Cenani-Lenz syndrome	hsa05217	Basal cell carcinoma	0.00937127278923144	APC	0.0176066337252229
Cenani-Lenz syndrome	hsa05210	Colorectal cancer	0.0105639802351337	APC	0.0176066337252229
Cenani-Lenz syndrome	hsa04310	Wnt signaling pathway	0.0255580166979043	APC	0.0319475208723803
Cenani-Lenz syndrome	hsa04810	Regulation of actin cytoskeleton	0.0362923837110242	APC	0.0362923837110242
Autosomal dominant hyperinsulinism due to SUR1 deficiency	hsa02010	ABC transporters	0.00749701823138538	ABCC8	0.00817856534332939
Autosomal dominant hyperinsulinism due to SUR1 deficiency	hsa04930	Type II diabetes mellitus	0.00817856534332939	ABCC8	0.00817856534332939
Diazoxide-resistant focal hyperinsulinism due to SUR1 deficiency	hsa02010	ABC transporters	0.00749701823138538	ABCC8	0.00817856534332939
Diazoxide-resistant focal hyperinsulinism due to SUR1 deficiency	hsa04930	Type II diabetes mellitus	0.00817856534332939	ABCC8	0.00817856534332939
Ataxia-telangiectasia	hsa04115	p53 signaling pathway	0.01158630090305	ATM	0.0211279604702675
Ataxia-telangiectasia	hsa04210	Apoptosis	0.0148236496847843	ATM	0.0211279604702675
Ataxia-telangiectasia	hsa04110	Cell cycle	0.0211279604702675	ATM	0.0211279604702675
Sporadic pheochromocytoma	hsa00020	Citrate cycle (TCA cycle)	0.000250215526772704	SDHD, SDHB	0.00200172421418163
Sporadic pheochromocytoma	hsa05211	Renal cell carcinoma	0.00137023560231133	EPAS1, VHL	0.00416450609035968
Sporadic pheochromocytoma	hsa05200	Pathways in cancer	0.00156168978388488	EPAS1, VHL, RET	0.00416450609035968
Sporadic pheochromocytoma	hsa05012	Parkinson's disease	0.00466039587102596	SDHD, SDHB	0.00768343736928276
Sporadic pheochromocytoma	hsa00190	Oxidative phosphorylation	0.00480214835580172	SDHD, SDHB	0.00768343736928276
Sporadic pheochromocytoma	hsa05010	Alzheimer's disease	0.00760618978289605	SDHD, SDHB	0.0101415863771947
Sporadic pheochromocytoma	hsa05016	Huntington's disease	0.00908784487440709	SDHD, SDHB	0.0103861084278938
Sporadic pheochromocytoma	hsa05216	Thyroid cancer	0.0244713882500173	RET	0.0244713882500173
Symptomatic form of Coffin-Lowry syndrome in female carriers	hsa04150	mTOR signaling pathway	0.00886011245527352	RPS6KA3	0.0259669449650707
Symptomatic form of Coffin-Lowry syndrome in female carriers	hsa04720	Long-term potentiation	0.011927074459022	RPS6KA3	0.0259669449650707
Symptomatic form of Coffin-Lowry syndrome in female carriers	hsa04914	Progesterone-mediated oocyte maturation	0.0146532629067984	RPS6KA3	0.0259669449650707
Symptomatic form of Coffin-Lowry syndrome in female carriers	hsa04114	Oocyte meiosis	0.0190833191344352	RPS6KA3	0.0259669449650707
Symptomatic form of Coffin-Lowry syndrome in female carriers	hsa04722	Neurotrophin signaling pathway	0.0216391208042256	RPS6KA3	0.0259669449650707
Symptomatic form of Coffin-Lowry syndrome in female carriers	hsa04010	MAPK signaling pathway	0.0456636565002557	RPS6KA3	0.0456636565002557
Spondylocarpotarsal synostosis	hsa05416	Viral myocarditis	0.0237139021324828	MYH3	0.0444800084740419
Spondylocarpotarsal synostosis	hsa04530	Tight junction	0.0444800084740419	MYH3	0.0444800084740419
Apolipoprotein A-I deficiency	hsa04975	Fat digestion and absorption	6.01057652404701e-05	APOA1, ABCA1	0.00030052882620235
Apolipoprotein A-I deficiency	hsa04977	Vitamin digestion and absorption	0.00816253713926518	APOA1	0.0186738740157608
Apolipoprotein A-I deficiency	hsa05143	African trypanosomiasis	0.011892520903159	APOA1	0.0186738740157608
Apolipoprotein A-I deficiency	hsa02010	ABC transporters	0.0149390992126086	ABCA1	0.0186738740157608
Apolipoprotein A-I deficiency	hsa03320	PPAR signaling pathway	0.0237139021324828	APOA1	0.0237139021324828
Tetraamelia-multiple malformations syndrome	hsa05217	Basal cell carcinoma	0.00937127278923144	WNT3	0.0190833191344353
Tetraamelia-multiple malformations syndrome	hsa04340	Hedgehog signaling pathway	0.00954165956721764	WNT3	0.0190833191344353
Tetraamelia-multiple malformations syndrome	hsa04916	Melanogenesis	0.0172090645765888	WNT3	0.0229454194354517
Tetraamelia-multiple malformations syndrome	hsa04310	Wnt signaling pathway	0.0255580166979043	WNT3	0.0255580166979043
Mucopolysaccharidosis type 6, slowly progressing	hsa00531	Glycosaminoglycan degradation	0.00323734878173465	ARSB	0.0064746975634693
Mucopolysaccharidosis type 6, slowly progressing	hsa04142	Lysosome	0.0206168001363094	ARSB	0.0206168001363094
Mucopolysaccharidosis type 6, rapidly progressing	hsa00531	Glycosaminoglycan degradation	0.00323734878173465	ARSB	0.0064746975634693
Mucopolysaccharidosis type 6, rapidly progressing	hsa04142	Lysosome	0.0206168001363094	ARSB	0.0206168001363094
Cardiospondylocarpofacial syndrome	hsa04621	NOD-like receptor signaling pathway	0.0098824331231897	MAP3K7	0.0281138183676946
Cardiospondylocarpofacial syndrome	hsa04622	RIG-I-like receptor signaling pathway	0.0120974612370082	MAP3K7	0.0281138183676946
Cardiospondylocarpofacial syndrome	hsa05140	Leishmaniasis	0.012267848014994	MAP3K7	0.0281138183676946
Cardiospondylocarpofacial syndrome	hsa04520	Adherens junction	0.0124382347929801	MAP3K7	0.0281138183676946
Cardiospondylocarpofacial syndrome	hsa04620	Toll-like receptor signaling pathway	0.0173794513545749	MAP3K7	0.0281138183676946
Cardiospondylocarpofacial syndrome	hsa04660	T cell receptor signaling pathway	0.0184017720224912	MAP3K7	0.0281138183676946
Cardiospondylocarpofacial syndrome	hsa04380	Osteoclast differentiation	0.0218095075822118	MAP3K7	0.0281138183676946
Cardiospondylocarpofacial syndrome	hsa05145	Toxoplasmosis	0.0224910546941557	MAP3K7	0.0281138183676946
Cardiospondylocarpofacial syndrome	hsa04310	Wnt signaling pathway	0.0255580166979043	MAP3K7	0.0283977963310047
Cardiospondylocarpofacial syndrome	hsa04010	MAPK signaling pathway	0.0456636565002557	MAP3K7	0.0456636565002557
Multiple synostoses syndrome	hsa04350	TGF-beta signaling pathway	0.00060167067262224	GDF5, NOG	0.00120334134524448
Multiple synostoses syndrome	hsa05218	Melanoma	0.0358611451900989	FGF9	0.0358611451900989
Zlotogora-Ogur syndrome	hsa04520	Adherens junction	0.0124382347929801	NECTIN1	0.0226614414721419
Zlotogora-Ogur syndrome	hsa04514	Cell adhesion molecules (CAMs)	0.0226614414721419	NECTIN1	0.0226614414721419
Combined immunodeficiency due to ZAP70 deficiency	hsa05340	Primary immunodeficiency	0.00596353722951104	ZAP70	0.0178906116885331
Combined immunodeficiency due to ZAP70 deficiency	hsa04660	T cell receptor signaling pathway	0.0184017720224912	ZAP70	0.0231726018060997
Combined immunodeficiency due to ZAP70 deficiency	hsa04650	Natural killer cell mediated cytotoxicity	0.0231726018060997	ZAP70	0.0231726018060997
Mitochondrial trifunctional protein deficiency	hsa00062	Fatty acid elongation	1.62604968766489e-06	HADHA, HADHB	1.62604968766489e-05
Mitochondrial trifunctional protein deficiency	hsa00071	Fatty acid degradation	5.24401024271928e-05	HADHA, HADHB	0.00018312416720607
Mitochondrial trifunctional protein deficiency	hsa00280	Valine, leucine and isoleucine degradation	5.4937250161821e-05	HADHA, HADHB	0.00018312416720607
Mitochondrial trifunctional protein deficiency	hsa01040	Biosynthesis of unsaturated fatty acids	0.00714404930275558	HADHA	0.0149672066429243
Mitochondrial trifunctional protein deficiency	hsa00410	beta-Alanine metabolism	0.00748360332146214	HADHA	0.0149672066429243
Mitochondrial trifunctional protein deficiency	hsa00650	Butanoate metabolism	0.0101979448357998	HADHA	0.0155370706890755
Mitochondrial trifunctional protein deficiency	hsa00640	Propanoate metabolism	0.0108759494823528	HADHA	0.0155370706890755
Mitochondrial trifunctional protein deficiency	hsa00380	Tryptophan metabolism	0.0142624883229305	HADHA	0.0165989991251207
Mitochondrial trifunctional protein deficiency	hsa00310	Lysine degradation	0.0149390992126086	HADHA	0.0165989991251207
Mitochondrial trifunctional protein deficiency	hsa01100	Metabolic pathways	0.0370440251791471	HADHA, HADHB	0.0370440251791471
Malonic aciduria	hsa00410	beta-Alanine metabolism	0.00374850911569258	MLYCD	0.00817856534332934
Malonic aciduria	hsa00640	Propanoate metabolism	0.00545237689555289	MLYCD	0.00817856534332934
Malonic aciduria	hsa04146	Peroxisome	0.0134605554608964	MLYCD	0.0134605554608964
Multiple epiphyseal dysplasia, Beighton type	hsa04974	Protein digestion and absorption	0.0138013290168684	COL2A1	0.0240813312886921
Multiple epiphyseal dysplasia, Beighton type	hsa04512	ECM-receptor interaction	0.0144828761288124	COL2A1	0.0240813312886921
Multiple epiphyseal dysplasia, Beighton type	hsa05146	Amoebiasis	0.0180609984665191	COL2A1	0.0240813312886921
Multiple epiphyseal dysplasia, Beighton type	hsa04510	Focal adhesion	0.0340773555972058	COL2A1	0.0340773555972058
Glycogen storage disease due to hepatic glycogen synthase deficiency	hsa00500	Starch and sucrose metabolism	0.00920088601124547	GYS2	0.0184017720224909
Glycogen storage disease due to hepatic glycogen synthase deficiency	hsa04910	Insulin signaling pathway	0.023513375362072	GYS2	0.023513375362072
Familial hyperthyroidism due to mutations in TSH receptor	hsa05320	Autoimmune thyroid disease	0.00886011245527352	TSHR	0.017720224910547
Familial hyperthyroidism due to mutations in TSH receptor	hsa04080	Neuroactive ligand-receptor interaction	0.0463452036121997	TSHR	0.0463452036121997
Congenital factor II deficiency	hsa04610	Complement and coagulation cascades	0.0117566876810358	F2	0.0352700630431073
Congenital factor II deficiency	hsa04810	Regulation of actin cytoskeleton	0.0362923837110242	F2	0.0463452036121997
Congenital factor II deficiency	hsa04080	Neuroactive ligand-receptor interaction	0.0463452036121997	F2	0.0463452036121997
Hyperimmunoglobulinemia D with periodic fever	hsa00900	Terpenoid backbone biosynthesis	0.00255580166979053	MVK	0.00511160333958105
Hyperimmunoglobulinemia D with periodic fever	hsa04146	Peroxisome	0.0134605554608964	MVK	0.0134605554608964
Immunodeficiency by defective expression of MHC class II	hsa05340	Primary immunodeficiency	1.06022616548866e-09	RFX5, RFXANK, RFXAP, CIITA	2.12045233097732e-09
Immunodeficiency by defective expression of MHC class II	hsa04612	Antigen processing and presentation	2.59786796155044e-08	RFX5, RFXANK, RFXAP, CIITA	2.59786796155044e-08
Herpes simplex virus encephalitis	hsa04620	Toll-like receptor signaling pathway	8.60487128954635e-08	TLR3, TICAM1, TRAF3, TBK1	3.44194851581854e-07
Herpes simplex virus encephalitis	hsa05160	Hepatitis C	2.60009552993213e-07	TLR3, TICAM1, TRAF3, TBK1	5.20019105986426e-07
Herpes simplex virus encephalitis	hsa04622	RIG-I-like receptor signaling pathway	0.000852352814628611	TRAF3, TBK1	0.00113647041950481
Herpes simplex virus encephalitis	hsa04623	Cytosolic DNA-sensing pathway	0.0376333269983061	TBK1	0.0376333269983061
Infantile Krabbe disease	hsa04142	Lysosome	0.000421611454730254	GALC, PSAP	0.000843222909460508
Infantile Krabbe disease	hsa00600	Sphingolipid metabolism	0.0135856451404401	GALC	0.0135856451404401
22q11.2 deletion syndrome	hsa04141	Protein processing in endoplasmic reticulum	0.00454155469184138	UFD1, SEC24C	0.0136246640755241
22q11.2 deletion syndrome	hsa00350	Tyrosine metabolism	0.0276589755675655	COMT	0.0376333269983061
22q11.2 deletion syndrome	hsa00140	Steroid hormone biosynthesis	0.0376333269983061	COMT	0.0376333269983061
Rolandic epilepsy	hsa04080	Neuroactive ligand-receptor interaction	0.00214034597459204	GABRG2, GRIN2A	0.00856138389836818
Rolandic epilepsy	hsa05014	Amyotrophic lateral sclerosis (ALS)	0.0179809735926045	GRIN2A	0.0316185361766437
Rolandic epilepsy	hsa04720	Long-term potentiation	0.0237139021324828	GRIN2A	0.0316185361766437
Rolandic epilepsy	hsa05322	Systemic lupus erythematosus	0.045812091607458	GRIN2A	0.045812091607458
Succinyl-CoA:3-ketoacid CoA transferase deficiency	hsa00072	Synthesis and degradation of ketone bodies	0.00153348100187423	OXCT1	0.00460044300562268
Succinyl-CoA:3-ketoacid CoA transferase deficiency	hsa00650	Butanoate metabolism	0.00511160333958083	OXCT1	0.00749701823138538
Succinyl-CoA:3-ketoacid CoA transferase deficiency	hsa00280	Valine, leucine and isoleucine degradation	0.00749701823138538	OXCT1	0.00749701823138538
3-methylcrotonyl-CoA carboxylase deficiency	hsa00280	Valine, leucine and isoleucine degradation	5.4937250161821e-05	MCCC1, MCCC2	0.000109874500323642
3-methylcrotonyl-CoA carboxylase deficiency	hsa01100	Metabolic pathways	0.0370440251791471	MCCC1, MCCC2	0.0370440251791471
3-hydroxy-3-methylglutaric aciduria	hsa00072	Synthesis and degradation of ketone bodies	0.00153348100187423	HMGCL	0.0061339240074969
3-hydroxy-3-methylglutaric aciduria	hsa00650	Butanoate metabolism	0.00511160333958083	HMGCL	0.00999602430851384
3-hydroxy-3-methylglutaric aciduria	hsa00280	Valine, leucine and isoleucine degradation	0.00749701823138538	HMGCL	0.00999602430851384
3-hydroxy-3-methylglutaric aciduria	hsa04146	Peroxisome	0.0134605554608964	HMGCL	0.0134605554608964
Hemolytic anemia due to glucophosphate isomerase deficiency	hsa00030	Pentose phosphate pathway	0.00460044300562257	GPI	0.0110751405690919
Hemolytic anemia due to glucophosphate isomerase deficiency	hsa00520	Amino sugar and nucleotide sugar metabolism	0.00817856534332939	GPI	0.0110751405690919
Hemolytic anemia due to glucophosphate isomerase deficiency	hsa00500	Starch and sucrose metabolism	0.00920088601124547	GPI	0.0110751405690919
Hemolytic anemia due to glucophosphate isomerase deficiency	hsa00010	Glycolysis / Gluconeogenesis	0.0110751405690919	GPI	0.0110751405690919
Symptomatic form of muscular dystrophy of Duchenne and Becker in female carriers	hsa05416	Viral myocarditis	0.011927074459022	DMD	0.0153348100187426
Symptomatic form of muscular dystrophy of Duchenne and Becker in female carriers	hsa05412	Arrhythmogenic right ventricular cardiomyopathy (ARVC)	0.012608621570966	DMD	0.0153348100187426
Symptomatic form of muscular dystrophy of Duchenne and Becker in female carriers	hsa05410	Hypertrophic cardiomyopathy (HCM)	0.0141421025728402	DMD	0.0153348100187426
Symptomatic form of muscular dystrophy of Duchenne and Becker in female carriers	hsa05414	Dilated cardiomyopathy	0.0153348100187426	DMD	0.0153348100187426
Sickle cell anemia	hsa05143	African trypanosomiasis	0.00596353722951104	HBB	0.00868972567728732
Sickle cell anemia	hsa05144	Malaria	0.00868972567728732	HBB	0.00868972567728732
Late-infantile/juvenile Krabbe disease	hsa00600	Sphingolipid metabolism	0.00681547111944103	GALC	0.0136309422388821
Late-infantile/juvenile Krabbe disease	hsa04142	Lysosome	0.0206168001363094	GALC	0.0206168001363094
Adult Krabbe disease	hsa00600	Sphingolipid metabolism	0.00681547111944103	GALC	0.0136309422388821
Adult Krabbe disease	hsa04142	Lysosome	0.0206168001363094	GALC	0.0206168001363094
Hypomyelination neuropathy-arthrogryposis syndrome	hsa04962	Vasopressin-regulated water reabsorption	0.0149390992126086	ADCY6	0.0421533368607889
Hypomyelination neuropathy-arthrogryposis syndrome	hsa04742	Taste transduction	0.0176432198431953	ADCY6	0.0421533368607889
Hypomyelination neuropathy-arthrogryposis syndrome	hsa04976	Bile secretion	0.0240506105642356	ADCY6	0.0421533368607889
Hypomyelination neuropathy-arthrogryposis syndrome	hsa04971	Gastric acid secretion	0.0250603874202756	ADCY6	0.0421533368607889
Hypomyelination neuropathy-arthrogryposis syndrome	hsa04914	Progesterone-mediated oocyte maturation	0.0290942682561534	ADCY6	0.0421533368607889
Hypomyelination neuropathy-arthrogryposis syndrome	hsa04970	Salivary secretion	0.0301014318180526	ADCY6	0.0421533368607889
Hypomyelination neuropathy-arthrogryposis syndrome	hsa05414	Dilated cardiomyopathy	0.0304370368589456	ADCY6	0.0421533368607889
Hypomyelination neuropathy-arthrogryposis syndrome	hsa04540	Gap junction	0.0304370368589456	ADCY6	0.0421533368607889
Hypomyelination neuropathy-arthrogryposis syndrome	hsa04912	GnRH signaling pathway	0.0341248594773667	ADCY6	0.0421533368607889
Hypomyelination neuropathy-arthrogryposis syndrome	hsa04916	Melanogenesis	0.0341248594773667	ADCY6	0.0421533368607889
Hypomyelination neuropathy-arthrogryposis syndrome	hsa04972	Pancreatic secretion	0.0341248594773667	ADCY6	0.0421533368607889
Hypomyelination neuropathy-arthrogryposis syndrome	hsa04114	Oocyte meiosis	0.0378056552382087	ADCY6	0.0421533368607889
Hypomyelination neuropathy-arthrogryposis syndrome	hsa04270	Vascular smooth muscle contraction	0.0391423842278754	ADCY6	0.0421533368607889
Hypomyelination neuropathy-arthrogryposis syndrome	hsa04514	Cell adhesion molecules (CAMs)	0.0448131163672006	CNTNAP1	0.0448131163672006
Laron syndrome	hsa04630	Jak-STAT signaling pathway	0.0264099505878344	GHR	0.0463452036121997
Laron syndrome	hsa04060	Cytokine-cytokine receptor interaction	0.0451524961662976	GHR	0.0463452036121997
Laron syndrome	hsa04080	Neuroactive ligand-receptor interaction	0.0463452036121997	GHR	0.0463452036121997
Kallmann syndrome	hsa05218	Melanoma	0.000191604689726972	FGFR1, FGF8, FGF17	0.00114962813836183
Kallmann syndrome	hsa04010	MAPK signaling pathway	0.000717734605570562	FGFR1, FGF8, FGF17, DUSP6	0.00215320381671169
Kallmann syndrome	hsa05200	Pathways in cancer	0.00150229508203376	FGFR1, FGF8, FGF17, DCC	0.00300459016406752
Kallmann syndrome	hsa04810	Regulation of actin cytoskeleton	0.00468168781630443	FGFR1, FGF8, FGF17	0.00702253172445665
Kallmann syndrome	hsa04360	Axon guidance	0.0192202834166868	SEMA3A, DCC	0.0230643401000242
Kallmann syndrome	hsa00534	Glycosaminoglycan biosynthesis - heparan sulfate / heparin	0.0434604431840113	HS6ST1	0.0434604431840113
Systemic lupus erythematosus	hsa05150	Staphylococcus aureus infection	1.97798659026125e-10	HLA-DRB1, IL10, FCGR3B, C4A, C4B, FCGR2B, ITGAM	3.56037586247025e-09
Systemic lupus erythematosus	hsa05140	Leishmaniasis	2.45670508276944e-06	HLA-DRB1, IL10, FCGR3B, ITGAM, IRAK1	1.7614511036544e-05
Systemic lupus erythematosus	hsa05322	Systemic lupus erythematosus	2.93575183942399e-06	HLA-DRB1, IL10, FCGR3B, C4A, C4B, FCGR2B	1.7614511036544e-05
Systemic lupus erythematosus	hsa05320	Autoimmune thyroid disease	0.000575203626300017	CTLA4, HLA-DRB1, IL10	0.00258841631835008
Systemic lupus erythematosus	hsa04514	Cell adhesion molecules (CAMs)	0.000750015115433646	CTLA4, HLA-DRB1, PDCD1, ITGAM	0.00270005441556113
Systemic lupus erythematosus	hsa04145	Phagosome	0.00126798513954347	HLA-DRB1, FCGR3B, FCGR2B, ITGAM	0.00338664574970914
Systemic lupus erythematosus	hsa04610	Complement and coagulation cascades	0.00131702890266467	C4A, C4B, CR2	0.00338664574970914
Systemic lupus erythematosus	hsa04640	Hematopoietic cell lineage	0.00265320922652565	HLA-DRB1, CR2, ITGAM	0.00596972075968271
Systemic lupus erythematosus	hsa04620	Toll-like receptor signaling pathway	0.00403411730995481	IRF5, SPP1, IRAK1	0.00736644149484487
Systemic lupus erythematosus	hsa05310	Asthma	0.00409246749713604	HLA-DRB1, IL10	0.00736644149484487
Systemic lupus erythematosus	hsa04660	T cell receptor signaling pathway	0.00473813917327633	CTLA4, IL10, PDCD1	0.00775331864717945
Systemic lupus erythematosus	hsa05330	Allograft rejection	0.00618177823563215	HLA-DRB1, IL10	0.00927266735344823
Systemic lupus erythematosus	hsa05145	Toxoplasmosis	0.00827860578801493	HLA-DRB1, IL10, IRAK1	0.0114626849372514
Systemic lupus erythematosus	hsa04672	Intestinal immune network for IgA production	0.0102507320457153	HLA-DRB1, IL10	0.0131795126302054
Systemic lupus erythematosus	hsa04662	B cell receptor signaling pathway	0.0239440113937379	CR2, FCGR2B	0.0287328136724855
Systemic lupus erythematosus	hsa05323	Rheumatoid arthritis	0.0342676748693569	CTLA4, HLA-DRB1	0.0385511342280265
Systemic lupus erythematosus	hsa05142	Chagas disease (American trypanosomiasis)	0.0437203322947512	IL10, IRAK1	0.0452532822776515
Systemic lupus erythematosus	hsa05146	Amoebiasis	0.0452532822776515	IL10, ITGAM	0.0452532822776515
Familial aortic dissection	hsa05416	Viral myocarditis	0.011927074459022	MYH11	0.0224910546941557
Familial aortic dissection	hsa04270	Vascular smooth muscle contraction	0.0197648662463792	MYH11	0.0224910546941557
Familial aortic dissection	hsa04530	Tight junction	0.0224910546941557	MYH11	0.0224910546941557
X-linked non-syndromic intellectual disability	hsa04614	Renin-angiotensin system	0.0257865407396669	AGTR2	0.0398889992969835
X-linked non-syndromic intellectual disability	hsa04810	Regulation of actin cytoskeleton	0.0398889992969835	PAK3, ARHGEF6	0.0398889992969835
Hemolytic anemia due to red cell pyruvate kinase deficiency	hsa04950	Maturity onset diabetes of the young	0.00425966944965073	PKLR	0.0163571306866588
Hemolytic anemia due to red cell pyruvate kinase deficiency	hsa00620	Pyruvate metabolism	0.00681547111944103	PKLR	0.0163571306866588
Hemolytic anemia due to red cell pyruvate kinase deficiency	hsa04930	Type II diabetes mellitus	0.00817856534332939	PKLR	0.0163571306866588
Hemolytic anemia due to red cell pyruvate kinase deficiency	hsa00010	Glycolysis / Gluconeogenesis	0.0110751405690919	PKLR	0.0166127108536378
Hemolytic anemia due to red cell pyruvate kinase deficiency	hsa04910	Insulin signaling pathway	0.023513375362072	PKLR	0.0276026580337366
Hemolytic anemia due to red cell pyruvate kinase deficiency	hsa00230	Purine metabolism	0.0276026580337366	PKLR	0.0276026580337366
Isolated asymptomatic elevation of creatine phosphokinase	hsa05100	Bacterial invasion of epithelial cells	0.011927074459022	CAV3	0.0342477423751917
Isolated asymptomatic elevation of creatine phosphokinase	hsa04510	Focal adhesion	0.0340773555972058	CAV3	0.0342477423751917
Isolated asymptomatic elevation of creatine phosphokinase	hsa04144	Endocytosis	0.0342477423751917	CAV3	0.0342477423751917
Leber congenital amaurosis	hsa00830	Retinol metabolism	9.91604828385113e-05	RDH12, RPE65, LRAT	0.000495802414192557
Leber congenital amaurosis	hsa00230	Purine metabolism	0.023998388777391	GUCY2D, IMPDH1	0.0436312051924872
Leber congenital amaurosis	hsa00760	Nicotinate and nicotinamide metabolism	0.0362315502777445	NMNAT1	0.0436312051924872
Leber congenital amaurosis	hsa04977	Vitamin digestion and absorption	0.0362315502777445	LRAT	0.0436312051924872
Leber congenital amaurosis	hsa04744	Phototransduction	0.0436312051924872	GUCY2D	0.0436312051924872
Multiple osteochondromas	hsa00534	Glycosaminoglycan biosynthesis - heparan sulfate / heparin	1.88737910175389e-05	EXT1, EXT2	3.77475820350778e-05
Multiple osteochondromas	hsa01100	Metabolic pathways	0.0370440251791471	EXT1, EXT2	0.0370440251791471
Lynch syndrome	hsa05210	Colorectal cancer	2.99068766414972e-11	TGFBR2, MLH1, MSH2, MSH6, PIK3CA, KRAS	4.84189148675273e-10
Lynch syndrome	hsa03430	Mismatch repair	3.22792765783515e-11	PMS2, MLH1, MLH3, MSH2, MSH6	4.84189148675273e-10
Lynch syndrome	hsa05200	Pathways in cancer	7.15312400022346e-07	TGFBR2, MLH1, MSH2, MSH6, PIK3CA, KRAS	7.15312400022346e-06
Lynch syndrome	hsa05213	Endometrial cancer	3.56141157138999e-05	MLH1, PIK3CA, KRAS	0.000267105867854249
Lynch syndrome	hsa05212	Pancreatic cancer	8.71984342930656e-05	TGFBR2, PIK3CA, KRAS	0.000494422088539393
Lynch syndrome	hsa05220	Chronic myeloid leukemia	9.88844177078786e-05	TGFBR2, PIK3CA, KRAS	0.000494422088539393
Lynch syndrome	hsa04960	Aldosterone-regulated sodium reabsorption	0.00136232102457332	PIK3CA, KRAS	0.00583851867674281
Lynch syndrome	hsa05223	Non-small cell lung cancer	0.00224571603155482	PIK3CA, KRAS	0.00833175111549613
Lynch syndrome	hsa05221	Acute myeloid leukemia	0.00249952533464884	PIK3CA, KRAS	0.00833175111549613
Lynch syndrome	hsa05214	Glioma	0.00323975865965191	PIK3CA, KRAS	0.00944104492145291
Lynch syndrome	hsa05211	Renal cell carcinoma	0.00374870689732145	PIK3CA, KRAS	0.00944104492145291
Lynch syndrome	hsa05218	Melanoma	0.00385472776811788	PIK3CA, KRAS	0.00944104492145291
Lynch syndrome	hsa04662	B cell receptor signaling pathway	0.00429281391676872	PIK3CA, KRAS	0.00944104492145291
Lynch syndrome	hsa04370	VEGF signaling pathway	0.00440582096334469	PIK3CA, KRAS	0.00944104492145291
Lynch syndrome	hsa04664	Fc epsilon RI signaling pathway	0.00475315896667178	PIK3CA, KRAS	0.00950631793334357
Lynch syndrome	hsa04914	Progesterone-mediated oocyte maturation	0.00561174337539801	PIK3CA, KRAS	0.0100002337892603
Lynch syndrome	hsa04012	ErbB signaling pathway	0.00573985481899592	PIK3CA, KRAS	0.0100002337892603
Lynch syndrome	hsa05215	Prostate cancer	0.00600014027355619	PIK3CA, KRAS	0.0100002337892603
Lynch syndrome	hsa05142	Chagas disease (American trypanosomiasis)	0.00812267716772747	TGFBR2, PIK3CA	0.0128252797385171
Lynch syndrome	hsa04660	T cell receptor signaling pathway	0.00873869048547181	PIK3CA, KRAS	0.0131080357282077
Lynch syndrome	hsa04722	Neurotrophin signaling pathway	0.0119442527050367	PIK3CA, KRAS	0.0165348127760476
Lynch syndrome	hsa04380	Osteoclast differentiation	0.0121255293691016	TGFBR2, PIK3CA	0.0165348127760476
Lynch syndrome	hsa05160	Hepatitis C	0.0132390559324268	PIK3CA, KRAS	0.0168070034534308
Lynch syndrome	hsa04650	Natural killer cell mediated cytotoxicity	0.0136200180557071	PIK3CA, KRAS	0.0168070034534308
Lynch syndrome	hsa04910	Insulin signaling pathway	0.0140058362111923	PIK3CA, KRAS	0.0168070034534308
Lynch syndrome	hsa04062	Chemokine signaling pathway	0.0254170809755882	PIK3CA, KRAS	0.0293274011256787
Lynch syndrome	hsa04810	Regulation of actin cytoskeleton	0.0317729179737688	PIK3CA, KRAS	0.0345737382543366
Lynch syndrome	hsa04320	Dorso-ventral axis formation	0.0322688223707142	KRAS	0.0345737382543366
Lynch syndrome	hsa05216	Thyroid cancer	0.0388755990454671	KRAS	0.0402161369435867
Lynch syndrome	hsa04010	MAPK signaling pathway	0.048478200777833	TGFBR2, KRAS	0.048478200777833
Aplasia cutis congenita	hsa04330	Notch signaling pathway	0.0238366858000604	DLL4	0.0453101690700749
Aplasia cutis congenita	hsa05412	Arrhythmogenic right ventricular cardiomyopathy (ARVC)	0.0373572224860503	ITGB4	0.0453101690700749
Aplasia cutis congenita	hsa03008	Ribosome biogenesis in eukaryotes	0.0403447324787838	BMS1	0.0453101690700749
Aplasia cutis congenita	hsa05410	Hypertrophic cardiomyopathy (HCM)	0.0418361667790873	ITGB4	0.0453101690700749
Aplasia cutis congenita	hsa04512	ECM-receptor interaction	0.0428295973399678	ITGB4	0.0453101690700749
Aplasia cutis congenita	hsa05414	Dilated cardiomyopathy	0.0453101690700749	ITGB4	0.0453101690700749
Spinocerebellar ataxia type 29	hsa04720	Long-term potentiation	0.011927074459022	ITPR1	0.0256943261202929
Spinocerebellar ataxia type 29	hsa04730	Long-term depression	0.011927074459022	ITPR1	0.0256943261202929
Spinocerebellar ataxia type 29	hsa04971	Gastric acid secretion	0.012608621570966	ITPR1	0.0256943261202929
Spinocerebellar ataxia type 29	hsa04070	Phosphatidylinositol signaling system	0.0132901686829102	ITPR1	0.0256943261202929
Spinocerebellar ataxia type 29	hsa04970	Salivary secretion	0.0151644232407567	ITPR1	0.0256943261202929
Spinocerebellar ataxia type 29	hsa04540	Gap junction	0.0153348100187426	ITPR1	0.0256943261202929
Spinocerebellar ataxia type 29	hsa04912	GnRH signaling pathway	0.0172090645765888	ITPR1	0.0256943261202929
Spinocerebellar ataxia type 29	hsa04972	Pancreatic secretion	0.0172090645765888	ITPR1	0.0256943261202929
Spinocerebellar ataxia type 29	hsa04114	Oocyte meiosis	0.0190833191344352	ITPR1	0.0256943261202929
Spinocerebellar ataxia type 29	hsa04270	Vascular smooth muscle contraction	0.0197648662463792	ITPR1	0.0256943261202929
Spinocerebellar ataxia type 29	hsa05010	Alzheimer's disease	0.0284545919236666	ITPR1	0.0311807803714431
Spinocerebellar ataxia type 29	hsa04020	Calcium signaling pathway	0.0301584597035269	ITPR1	0.0311807803714431
Spinocerebellar ataxia type 29	hsa05016	Huntington's disease	0.0311807803714431	ITPR1	0.0311807803714431
Bilateral generalized polymicrogyria	hsa05014	Amyotrophic lateral sclerosis (ALS)	0.00903049923325949	GRIN1	0.0357812233770659
Bilateral generalized polymicrogyria	hsa04720	Long-term potentiation	0.011927074459022	GRIN1	0.0357812233770659
Bilateral generalized polymicrogyria	hsa05010	Alzheimer's disease	0.0284545919236666	GRIN1	0.0374169364457317
Bilateral generalized polymicrogyria	hsa04020	Calcium signaling pathway	0.0301584597035269	GRIN1	0.0374169364457317
Bilateral generalized polymicrogyria	hsa05016	Huntington's disease	0.0311807803714431	GRIN1	0.0374169364457317
Bilateral generalized polymicrogyria	hsa04080	Neuroactive ligand-receptor interaction	0.0463452036121997	GRIN1	0.0463452036121997
DYNC1H1-related autosomal dominant childhood-onset proximal spinal muscular atrophy	hsa04962	Vasopressin-regulated water reabsorption	0.00749701823138538	DYNC1H1	0.0149940364627708
DYNC1H1-related autosomal dominant childhood-onset proximal spinal muscular atrophy	hsa04145	Phagosome	0.0260691770318624	DYNC1H1	0.0260691770318624
{Antisocial behavior}, 300615 (3)	hsa00360	Phenylalanine metabolism	0.0028965752257627	MAOA	0.0100187425455785
{Antisocial behavior}, 300615 (3)	hsa00340	Histidine metabolism	0.00494121656159496	MAOA	0.0100187425455785
{Antisocial behavior}, 300615 (3)	hsa00260	Glycine, serine and threonine metabolism	0.00545237689555289	MAOA	0.0100187425455785
{Antisocial behavior}, 300615 (3)	hsa00350	Tyrosine metabolism	0.00698585789742723	MAOA	0.0100187425455785
{Antisocial behavior}, 300615 (3)	hsa00380	Tryptophan metabolism	0.0071562446754132	MAOA	0.0100187425455785
{Antisocial behavior}, 300615 (3)	hsa00330	Arginine and proline metabolism	0.00920088601124547	MAOA	0.0107343670131197
{Antisocial behavior}, 300615 (3)	hsa00982	Drug metabolism - cytochrome P450	0.0124382347929801	MAOA	0.0124382347929801
Oculocerebrorenal syndrome of Lowe	hsa00562	Inositol phosphate metabolism	0.00971204634520362	OCRL	0.0132901686829102
Oculocerebrorenal syndrome of Lowe	hsa04070	Phosphatidylinositol signaling system	0.0132901686829102	OCRL	0.0132901686829102
Intermediate osteopetrosis	hsa04966	Collecting duct acid secretion	0.00460044300562257	TCIRG1	0.0260691770318624
Intermediate osteopetrosis	hsa05110	Vibrio cholerae infection	0.00920088601124547	TCIRG1	0.0260691770318624
Intermediate osteopetrosis	hsa05120	Epithelial cell signaling in Helicobacter pylori infection	0.01158630090305	TCIRG1	0.0260691770318624
Intermediate osteopetrosis	hsa05323	Rheumatoid arthritis	0.0155051967967285	TCIRG1	0.0260691770318624
Intermediate osteopetrosis	hsa04142	Lysosome	0.0206168001363094	TCIRG1	0.0260691770318624
Intermediate osteopetrosis	hsa00190	Oxidative phosphorylation	0.0224910546941557	TCIRG1	0.0260691770318624
Intermediate osteopetrosis	hsa04145	Phagosome	0.0260691770318624	TCIRG1	0.0260691770318624
Pontocerebellar hypoplasia type 1	hsa03018	RNA degradation	6.72981039019578e-06	EXOSC3, EXOSC8, EXOSC9	1.34596207803916e-05
Pontocerebellar hypoplasia type 1	hsa00970	Aminoacyl-tRNA biosynthesis	0.0422616710434089	RARS2	0.0422616710434089
Hypercholesterolemia due to cholesterol 7alpha-hydroxylase deficiency	hsa00120	Primary bile acid biosynthesis	0.0027261884477765	CYP7A1	0.010904753791106
Hypercholesterolemia due to cholesterol 7alpha-hydroxylase deficiency	hsa00140	Steroid hormone biosynthesis	0.00954165956721764	CYP7A1	0.0120974612370082
Hypercholesterolemia due to cholesterol 7alpha-hydroxylase deficiency	hsa03320	PPAR signaling pathway	0.011927074459022	CYP7A1	0.0120974612370082
Hypercholesterolemia due to cholesterol 7alpha-hydroxylase deficiency	hsa04976	Bile secretion	0.0120974612370082	CYP7A1	0.0120974612370082
Autosomal dominant rhegmatogenous retinal detachment	hsa04974	Protein digestion and absorption	0.0138013290168684	COL2A1	0.0240813312886921
Autosomal dominant rhegmatogenous retinal detachment	hsa04512	ECM-receptor interaction	0.0144828761288124	COL2A1	0.0240813312886921
Autosomal dominant rhegmatogenous retinal detachment	hsa05146	Amoebiasis	0.0180609984665191	COL2A1	0.0240813312886921
Autosomal dominant rhegmatogenous retinal detachment	hsa04510	Focal adhesion	0.0340773555972058	COL2A1	0.0340773555972058
Catecholaminergic polymorphic ventricular tachycardia	hsa04744	Phototransduction	4.32576952987749e-07	CALM1, CALM2, CALM3	6.40251871465092e-06
Catecholaminergic polymorphic ventricular tachycardia	hsa04020	Calcium signaling pathway	8.00314839331365e-07	RYR2, CALM1, CALM2, CALM3	6.40251871465092e-06
Catecholaminergic polymorphic ventricular tachycardia	hsa05214	Glioma	5.14715423812595e-06	CALM1, CALM2, CALM3	2.38656203034053e-05
Catecholaminergic polymorphic ventricular tachycardia	hsa04720	Long-term potentiation	6.44628351839249e-06	CALM1, CALM2, CALM3	2.38656203034053e-05
Catecholaminergic polymorphic ventricular tachycardia	hsa04971	Gastric acid secretion	7.62985616513801e-06	CALM1, CALM2, CALM3	2.38656203034053e-05
Catecholaminergic polymorphic ventricular tachycardia	hsa04070	Phosphatidylinositol signaling system	8.94960761377699e-06	CALM1, CALM2, CALM3	2.38656203034053e-05
Catecholaminergic polymorphic ventricular tachycardia	hsa04970	Salivary secretion	1.33407380821276e-05	CALM1, CALM2, CALM3	3.04931156162915e-05
Catecholaminergic polymorphic ventricular tachycardia	hsa04912	GnRH signaling pathway	1.95465556645871e-05	CALM1, CALM2, CALM3	3.47494322925993e-05
Catecholaminergic polymorphic ventricular tachycardia	hsa04916	Melanogenesis	1.95465556645871e-05	CALM1, CALM2, CALM3	3.47494322925993e-05
Catecholaminergic polymorphic ventricular tachycardia	hsa04114	Oocyte meiosis	2.66949045077562e-05	CALM1, CALM2, CALM3	4.27118472124099e-05
Catecholaminergic polymorphic ventricular tachycardia	hsa04270	Vascular smooth muscle contraction	2.96708549718175e-05	CALM1, CALM2, CALM3	4.31576072317345e-05
Catecholaminergic polymorphic ventricular tachycardia	hsa04722	Neurotrophin signaling pathway	3.89702746312242e-05	CALM1, CALM2, CALM3	5.19603661749655e-05
Catecholaminergic polymorphic ventricular tachycardia	hsa04910	Insulin signaling pathway	5.0022647063415e-05	CALM1, CALM2, CALM3	6.156633484728e-05
Catecholaminergic polymorphic ventricular tachycardia	hsa05010	Alzheimer's disease	8.86533088181843e-05	CALM1, CALM2, CALM3	0.000101318067220782
Catecholaminergic polymorphic ventricular tachycardia	hsa04740	Olfactory transduction	0.00109093214129652	CALM1, CALM2, CALM3	0.00116366095071628
Catecholaminergic polymorphic ventricular tachycardia	hsa05412	Arrhythmogenic right ventricular cardiomyopathy (ARVC)	0.0495010284076379	RYR2	0.0495010284076379
Macrocephaly-intellectual disability-autism syndrome	hsa05213	Endometrial cancer	0.00886011245527352	PTEN	0.0189555290509459
Macrocephaly-intellectual disability-autism syndrome	hsa00562	Inositol phosphate metabolism	0.00971204634520362	PTEN	0.0189555290509459
Macrocephaly-intellectual disability-autism syndrome	hsa05214	Glioma	0.0110751405690919	PTEN	0.0189555290509459
Macrocephaly-intellectual disability-autism syndrome	hsa04115	p53 signaling pathway	0.01158630090305	PTEN	0.0189555290509459
Macrocephaly-intellectual disability-autism syndrome	hsa05218	Melanoma	0.0120974612370082	PTEN	0.0189555290509459
Macrocephaly-intellectual disability-autism syndrome	hsa04070	Phosphatidylinositol signaling system	0.0132901686829102	PTEN	0.0189555290509459
Macrocephaly-intellectual disability-autism syndrome	hsa05222	Small cell lung cancer	0.0144828761288124	PTEN	0.0189555290509459
Macrocephaly-intellectual disability-autism syndrome	hsa05215	Prostate cancer	0.0151644232407567	PTEN	0.0189555290509459
Macrocephaly-intellectual disability-autism syndrome	hsa04530	Tight junction	0.0224910546941557	PTEN	0.0249900607712841
Macrocephaly-intellectual disability-autism syndrome	hsa04510	Focal adhesion	0.0340773555972058	PTEN	0.0340773555972058
Adult hepatocellular carcinoma	hsa05213	Endometrial cancer	2.46239386657462e-09	AXIN1, TP53, CTNNB1, EGF, PIK3CA	7.38718159972387e-08
Adult hepatocellular carcinoma	hsa05200	Pathways in cancer	7.15312400022346e-07	AXIN1, CASP8, TP53, CTNNB1, EGF, PIK3CA	7.65978143474164e-06
Adult hepatocellular carcinoma	hsa05210	Colorectal cancer	7.65978143474164e-07	AXIN1, TP53, CTNNB1, PIK3CA	7.65978143474164e-06
Adult hepatocellular carcinoma	hsa05215	Prostate cancer	3.3031465063818e-06	TP53, CTNNB1, EGF, PIK3CA	2.47735987978635e-05
Adult hepatocellular carcinoma	hsa04150	mTOR signaling pathway	3.56141157138999e-05	TSC2, TSC1, PIK3CA	0.000180841081525869
Adult hepatocellular carcinoma	hsa05223	Non-small cell lung cancer	3.9920280816151e-05	TP53, EGF, PIK3CA	0.000180841081525869
Adult hepatocellular carcinoma	hsa05217	Basal cell carcinoma	4.21962523560361e-05	AXIN1, TP53, CTNNB1	0.000180841081525869
Adult hepatocellular carcinoma	hsa05214	Glioma	6.98045098740227e-05	TP53, EGF, PIK3CA	0.000248145967757916
Adult hepatocellular carcinoma	hsa04115	p53 signaling pathway	7.99354006634514e-05	CASP8, TP53, TSC2	0.000248145967757916
Adult hepatocellular carcinoma	hsa05212	Pancreatic cancer	8.71984342930656e-05	TP53, EGF, PIK3CA	0.000248145967757916
Adult hepatocellular carcinoma	hsa05218	Melanoma	9.09868548445694e-05	TP53, EGF, PIK3CA	0.000248145967757916
Adult hepatocellular carcinoma	hsa04210	Apoptosis	0.000167007022486593	CASP8, TP53, PIK3CA	0.000417517556216483
Adult hepatocellular carcinoma	hsa05160	Hepatitis C	0.000599300014013192	TP53, EGF, PIK3CA	0.00130664542097745
Adult hepatocellular carcinoma	hsa05216	Thyroid cancer	0.000648124157510533	TP53, CTNNB1	0.00130664542097745
Adult hepatocellular carcinoma	hsa04910	Insulin signaling pathway	0.000653322710488724	TSC2, TSC1, PIK3CA	0.00130664542097745
Adult hepatocellular carcinoma	hsa04310	Wnt signaling pathway	0.000833972545583329	AXIN1, TP53, CTNNB1	0.00156369852296874
Adult hepatocellular carcinoma	hsa05219	Bladder cancer	0.00136232102457332	TP53, EGF	0.00240409592571763
Adult hepatocellular carcinoma	hsa04510	Focal adhesion	0.00192331632956459	CTNNB1, EGF, PIK3CA	0.00320552721594099
Adult hepatocellular carcinoma	hsa05100	Bacterial invasion of epithelial cells	0.00374870689732145	CTNNB1, PIK3CA	0.00591901089050755
Adult hepatocellular carcinoma	hsa05220	Chronic myeloid leukemia	0.00407097637810716	TP53, PIK3CA	0.00610646456716074
Adult hepatocellular carcinoma	hsa05222	Small cell lung cancer	0.00548499009020175	TP53, PIK3CA	0.00782707475317626
Adult hepatocellular carcinoma	hsa04012	ErbB signaling pathway	0.00573985481899592	EGF, PIK3CA	0.00782707475317626
Adult hepatocellular carcinoma	hsa04620	Toll-like receptor signaling pathway	0.0078224898160258	CASP8, PIK3CA	0.0101533464596593
Adult hepatocellular carcinoma	hsa05142	Chagas disease (American trypanosomiasis)	0.00812267716772747	CASP8, PIK3CA	0.0101533464596593
Adult hepatocellular carcinoma	hsa04670	Leukocyte transendothelial migration	0.0100326228428774	CTNNB1, PIK3CA	0.0120391474114529
Adult hepatocellular carcinoma	hsa04722	Neurotrophin signaling pathway	0.0119442527050367	TP53, PIK3CA	0.0137818300442732
Adult hepatocellular carcinoma	hsa05145	Toxoplasmosis	0.0128629721725661	CASP8, PIK3CA	0.0142921913028512
Adult hepatocellular carcinoma	hsa05016	Huntington's disease	0.0239231641606274	CASP8, TP53	0.0256319616006722
Adult hepatocellular carcinoma	hsa04810	Regulation of actin cytoskeleton	0.0317729179737688	EGF, PIK3CA	0.0328685358349332
Adult hepatocellular carcinoma	hsa04010	MAPK signaling pathway	0.048478200777833	TP53, EGF	0.048478200777833
Multiple endocrine neoplasia type 1	hsa04110	Cell cycle	1.8995889563057e-07	CDKN1B, CDKN1A, CDKN2B, CDKN2C	1.8995889563057e-06
Multiple endocrine neoplasia type 1	hsa05200	Pathways in cancer	0.000651507781483612	CDKN1B, CDKN1A, CDKN2B	0.00222943030791619
Multiple endocrine neoplasia type 1	hsa05220	Chronic myeloid leukemia	0.00090098918439255	CDKN1B, CDKN1A	0.00222943030791619
Multiple endocrine neoplasia type 1	hsa05222	Small cell lung cancer	0.00122058733684683	CDKN1B, CDKN2B	0.00222943030791619
Multiple endocrine neoplasia type 1	hsa04012	ErbB signaling pathway	0.00127846629837044	CDKN1B, CDKN1A	0.00222943030791619
Multiple endocrine neoplasia type 1	hsa05215	Prostate cancer	0.00133765818474971	CDKN1B, CDKN1A	0.00222943030791619
Multiple endocrine neoplasia type 1	hsa05219	Bladder cancer	0.0283263338547531	CDKN1A	0.0404661912210759
Multiple endocrine neoplasia type 1	hsa05214	Glioma	0.0435809832740012	CDKN1A	0.0475307426485889
Multiple endocrine neoplasia type 1	hsa04115	p53 signaling pathway	0.0455573953273322	CDKN1A	0.0475307426485889
Multiple endocrine neoplasia type 1	hsa05218	Melanoma	0.0475307426485889	CDKN1A	0.0475307426485889
Inherited congenital spastic tetraplegia	hsa00430	Taurine and hypotaurine metabolism	0.00170386777986031	GAD1	0.00681547111944111
Inherited congenital spastic tetraplegia	hsa00410	beta-Alanine metabolism	0.00374850911569258	GAD1	0.00681547111944111
Inherited congenital spastic tetraplegia	hsa00650	Butanoate metabolism	0.00511160333958083	GAD1	0.00681547111944111
Inherited congenital spastic tetraplegia	hsa00250	Alanine, aspartate and glutamate metabolism	0.00545237689555289	GAD1	0.00681547111944111
Inherited congenital spastic tetraplegia	hsa04940	Type I diabetes mellitus	0.00732663145339929	GAD1	0.00732663145339929
Tufted angioma	hsa05142	Chagas disease (American trypanosomiasis)	0.0177202249105469	GNA14	0.0270914976997786
Tufted angioma	hsa05146	Amoebiasis	0.0180609984665191	GNA14	0.0270914976997786
Tufted angioma	hsa04020	Calcium signaling pathway	0.0301584597035269	GNA14	0.0301584597035269
Episodic ataxia type 5	hsa05412	Arrhythmogenic right ventricular cardiomyopathy (ARVC)	0.012608621570966	CACNB4	0.0191685125234282
Episodic ataxia type 5	hsa04260	Cardiac muscle contraction	0.0131197819049241	CACNB4	0.0191685125234282
Episodic ataxia type 5	hsa05410	Hypertrophic cardiomyopathy (HCM)	0.0141421025728402	CACNB4	0.0191685125234282
Episodic ataxia type 5	hsa05414	Dilated cardiomyopathy	0.0153348100187426	CACNB4	0.0191685125234282
Episodic ataxia type 5	hsa04010	MAPK signaling pathway	0.0456636565002557	CACNB4	0.0456636565002557
Kaposiform hemangioendothelioma	hsa05142	Chagas disease (American trypanosomiasis)	0.0177202249105469	GNA14	0.0270914976997786
Kaposiform hemangioendothelioma	hsa05146	Amoebiasis	0.0180609984665191	GNA14	0.0270914976997786
Kaposiform hemangioendothelioma	hsa04020	Calcium signaling pathway	0.0301584597035269	GNA14	0.0301584597035269
Infantile myofibromatosis	hsa04320	Dorso-ventral axis formation	0.00816253713926518	NOTCH3	0.0304370368589456
Infantile myofibromatosis	hsa04330	Notch signaling pathway	0.0159535799981021	NOTCH3	0.0304370368589456
Infantile myofibromatosis	hsa05214	Glioma	0.0220294888756714	PDGFRB	0.0304370368589456
Infantile myofibromatosis	hsa05218	Melanoma	0.0240506105642356	PDGFRB	0.0304370368589456
Infantile myofibromatosis	hsa05215	Prostate cancer	0.0301014318180526	PDGFRB	0.0304370368589456
Infantile myofibromatosis	hsa04540	Gap junction	0.0304370368589456	PDGFRB	0.0304370368589456
Propionic acidemia	hsa00630	Glyoxylate and dicarboxylate metabolism	8.88520007902602e-06	PCCA, PCCB	3.55408003161041e-05
Propionic acidemia	hsa00640	Propanoate metabolism	2.8804308752921e-05	PCCA, PCCB	5.76086175058419e-05
Propionic acidemia	hsa00280	Valine, leucine and isoleucine degradation	5.4937250161821e-05	PCCA, PCCB	7.32496668824281e-05
Propionic acidemia	hsa01100	Metabolic pathways	0.0370440251791471	PCCA, PCCB	0.0370440251791471
Long chain 3-hydroxyacyl-CoA dehydrogenase deficiency	hsa00062	Fatty acid elongation	0.00136309422388825	HADHA	0.00749701823138538
Long chain 3-hydroxyacyl-CoA dehydrogenase deficiency	hsa01040	Biosynthesis of unsaturated fatty acids	0.00357812233770649	HADHA	0.00749701823138538
Long chain 3-hydroxyacyl-CoA dehydrogenase deficiency	hsa00410	beta-Alanine metabolism	0.00374850911569258	HADHA	0.00749701823138538
Long chain 3-hydroxyacyl-CoA dehydrogenase deficiency	hsa00650	Butanoate metabolism	0.00511160333958083	HADHA	0.00749701823138538
Long chain 3-hydroxyacyl-CoA dehydrogenase deficiency	hsa00640	Propanoate metabolism	0.00545237689555289	HADHA	0.00749701823138538
Long chain 3-hydroxyacyl-CoA dehydrogenase deficiency	hsa00380	Tryptophan metabolism	0.0071562446754132	HADHA	0.00749701823138538
Long chain 3-hydroxyacyl-CoA dehydrogenase deficiency	hsa00071	Fatty acid degradation	0.00732663145339929	HADHA	0.00749701823138538
Long chain 3-hydroxyacyl-CoA dehydrogenase deficiency	hsa00280	Valine, leucine and isoleucine degradation	0.00749701823138538	HADHA	0.00749701823138538
Long chain 3-hydroxyacyl-CoA dehydrogenase deficiency	hsa00310	Lysine degradation	0.00749701823138538	HADHA	0.00749701823138538
Glutaryl-CoA dehydrogenase deficiency	hsa00380	Tryptophan metabolism	0.0071562446754132	GCDH	0.00749701823138538
Glutaryl-CoA dehydrogenase deficiency	hsa00071	Fatty acid degradation	0.00732663145339929	GCDH	0.00749701823138538
Glutaryl-CoA dehydrogenase deficiency	hsa00310	Lysine degradation	0.00749701823138538	GCDH	0.00749701823138538
Familial melanoma	hsa05218	Melanoma	1.66783163224125e-05	CDK4, CDKN2A, MITF	0.000183461479546537
Familial melanoma	hsa05200	Pathways in cancer	4.47197798827648e-05	CDK4, CDKN2A, MITF, CDKN2B	0.000245958789355206
Familial melanoma	hsa04110	Cell cycle	8.92647530027824e-05	CDK4, CDKN2A, CDKN2B	0.000327304094343535
Familial melanoma	hsa05219	Bladder cancer	0.000493226282306196	CDK4, CDKN2A	0.00135637227634204
Familial melanoma	hsa05223	Non-small cell lung cancer	0.000816392359091727	CDK4, CDKN2A	0.0017960631900018
Familial melanoma	hsa05214	Glioma	0.0011821862835903	CDK4, CDKN2A	0.00182056762561453
Familial melanoma	hsa04115	p53 signaling pathway	0.00129339047294746	CDK4, CDKN2A	0.00182056762561453
Familial melanoma	hsa05212	Pancreatic cancer	0.00137023560231133	CDK4, CDKN2A	0.00182056762561453
Familial melanoma	hsa05220	Chronic myeloid leukemia	0.00148955533004825	CDK4, CDKN2A	0.00182056762561453
Familial melanoma	hsa05222	Small cell lung cancer	0.00201516689700873	CDK4, CDKN2B	0.0022166835867096
Familial melanoma	hsa04916	Melanogenesis	0.00283495851045867	MITF, MC1R	0.00283495851045867
Adenocarcinoma of ovary	hsa04350	TGF-beta signaling pathway	0.0143124893508263	INHBA	0.0286249787016526
Adenocarcinoma of ovary	hsa04060	Cytokine-cytokine receptor interaction	0.0451524961662976	INHBA	0.0451524961662976
Medium chain acyl-CoA dehydrogenase deficiency	hsa00410	beta-Alanine metabolism	0.00374850911569258	ACADM	0.00937127278923172
Medium chain acyl-CoA dehydrogenase deficiency	hsa00640	Propanoate metabolism	0.00545237689555289	ACADM	0.00937127278923172
Medium chain acyl-CoA dehydrogenase deficiency	hsa00071	Fatty acid degradation	0.00732663145339929	ACADM	0.00937127278923172
Medium chain acyl-CoA dehydrogenase deficiency	hsa00280	Valine, leucine and isoleucine degradation	0.00749701823138538	ACADM	0.00937127278923172
Medium chain acyl-CoA dehydrogenase deficiency	hsa03320	PPAR signaling pathway	0.011927074459022	ACADM	0.011927074459022
Hereditary site-specific ovarian cancer syndrome	hsa03440	Homologous recombination	0.00951970789643408	BRCA2	0.0285591236893022
Hereditary site-specific ovarian cancer syndrome	hsa05212	Pancreatic cancer	0.0237139021324828	BRCA2	0.0355708531987242
Hereditary site-specific ovarian cancer syndrome	hsa04120	Ubiquitin mediated proteolysis	0.0454791579339087	BRCA1	0.0454791579339087
Gamma-aminobutyric acid transaminase deficiency	hsa00410	beta-Alanine metabolism	0.00374850911569258	ABAT	0.00681547111944111
Gamma-aminobutyric acid transaminase deficiency	hsa00650	Butanoate metabolism	0.00511160333958083	ABAT	0.00681547111944111
Gamma-aminobutyric acid transaminase deficiency	hsa00250	Alanine, aspartate and glutamate metabolism	0.00545237689555289	ABAT	0.00681547111944111
Gamma-aminobutyric acid transaminase deficiency	hsa00640	Propanoate metabolism	0.00545237689555289	ABAT	0.00681547111944111
Gamma-aminobutyric acid transaminase deficiency	hsa00280	Valine, leucine and isoleucine degradation	0.00749701823138538	ABAT	0.00749701823138538
Bifunctional enzyme deficiency	hsa04146	Peroxisome	0.000178923538846269	HSD17B4, EHHADH	0.00196815892730896
Bifunctional enzyme deficiency	hsa00120	Primary bile acid biosynthesis	0.00544540811117689	HSD17B4	0.0182588990376327
Bifunctional enzyme deficiency	hsa00410	beta-Alanine metabolism	0.00748360332146214	EHHADH	0.0182588990376327
Bifunctional enzyme deficiency	hsa00650	Butanoate metabolism	0.0101979448357998	EHHADH	0.0182588990376327
Bifunctional enzyme deficiency	hsa00640	Propanoate metabolism	0.0108759494823528	EHHADH	0.0182588990376327
Bifunctional enzyme deficiency	hsa00380	Tryptophan metabolism	0.0142624883229305	EHHADH	0.0182588990376327
Bifunctional enzyme deficiency	hsa00071	Fatty acid degradation	0.0146008228043711	EHHADH	0.0182588990376327
Bifunctional enzyme deficiency	hsa00280	Valine, leucine and isoleucine degradation	0.0149390992126086	EHHADH	0.0182588990376327
Bifunctional enzyme deficiency	hsa00310	Lysine degradation	0.0149390992126086	EHHADH	0.0182588990376327
Bifunctional enzyme deficiency	hsa03320	PPAR signaling pathway	0.0237139021324828	EHHADH	0.0260852923457311
Bifunctional enzyme deficiency	hsa01100	Metabolic pathways	0.0370440251791471	HSD17B4, EHHADH	0.0370440251791471
X-linked agammaglobulinemia	hsa05340	Primary immunodeficiency	0.00596353722951104	BTK	0.0179474072811952
X-linked agammaglobulinemia	hsa04662	B cell receptor signaling pathway	0.0127790083489521	BTK	0.0179474072811952
X-linked agammaglobulinemia	hsa04664	Fc epsilon RI signaling pathway	0.0134605554608964	BTK	0.0179474072811952
X-linked agammaglobulinemia	hsa04380	Osteoclast differentiation	0.0218095075822118	BTK	0.0218095075822118
Endometrial stromal sarcoma	hsa04114	Oocyte meiosis	0.0190833191344352	YWHAE	0.0216391208042256
Endometrial stromal sarcoma	hsa04110	Cell cycle	0.0211279604702675	YWHAE	0.0216391208042256
Endometrial stromal sarcoma	hsa04722	Neurotrophin signaling pathway	0.0216391208042256	YWHAE	0.0216391208042256
Common variable immunodeficiency	hsa05340	Primary immunodeficiency	3.3965010491923e-07	CD19, ICOS, TNFRSF13C, TNFRSF13B	3.3965010491923e-06
Common variable immunodeficiency	hsa04662	B cell receptor signaling pathway	7.58732353324682e-06	CD19, CR2, CD81, NFKB1	3.79366176662341e-05
Common variable immunodeficiency	hsa04672	Intestinal immune network for IgA production	8.09246485794746e-05	ICOS, TNFRSF13C, TNFRSF13B	0.000269748828598248
Common variable immunodeficiency	hsa04640	Hematopoietic cell lineage	0.000492753082250655	CD19, CR2, MS4A1	0.00123188270562664
Common variable immunodeficiency	hsa04060	Cytokine-cytokine receptor interaction	0.0114649894552994	TNFRSF13C, TNFSF12, TNFRSF13B	0.0229299789105987
Common variable immunodeficiency	hsa04660	T cell receptor signaling pathway	0.0165584490425199	ICOS, NFKB1	0.0275974150708666
Common variable immunodeficiency	hsa04722	Neurotrophin signaling pathway	0.0224878309458002	PRKCD, NFKB1	0.0276298516074013
Common variable immunodeficiency	hsa04380	Osteoclast differentiation	0.0228214315095488	NFKB1, NFKB2	0.0276298516074013
Common variable immunodeficiency	hsa05160	Hepatitis C	0.0248668664466612	CD81, NFKB1	0.0276298516074013
Common variable immunodeficiency	hsa04062	Chemokine signaling pathway	0.0468670103660632	PRKCD, NFKB1	0.0468670103660632
Autoimmune lymphoproliferative syndrome	hsa04210	Apoptosis	3.08027947627724e-05	CASP10, FAS, FASLG	0.000400436331916041
Autoimmune lymphoproliferative syndrome	hsa05143	African trypanosomiasis	0.000341664385426355	FAS, FASLG	0.00134448382025693
Autoimmune lymphoproliferative syndrome	hsa05330	Allograft rejection	0.000382172985025498	FAS, FASLG	0.00134448382025693
Autoimmune lymphoproliferative syndrome	hsa05332	Graft-versus-host disease	0.000469900033563915	FAS, FASLG	0.00134448382025693
Autoimmune lymphoproliferative syndrome	hsa04940	Type I diabetes mellitus	0.00051710916163728	FAS, FASLG	0.00134448382025693
Autoimmune lymphoproliferative syndrome	hsa05320	Autoimmune thyroid disease	0.00075700760381875	FAS, FASLG	0.00163304022023965
Autoimmune lymphoproliferative syndrome	hsa04010	MAPK signaling pathway	0.000879329349359812	FAS, FASLG, RASGRP1	0.00163304022023965
Autoimmune lymphoproliferative syndrome	hsa05142	Chagas disease (American trypanosomiasis)	0.00300364003402137	FAS, FASLG	0.00488091505528472
Autoimmune lymphoproliferative syndrome	hsa04722	Neurotrophin signaling pathway	0.00445156805475637	FASLG, PRKCD	0.0064300427457592
Autoimmune lymphoproliferative syndrome	hsa04650	Natural killer cell mediated cytotoxicity	0.00509171480046661	FAS, FASLG	0.00661922924060659
Autoimmune lymphoproliferative syndrome	hsa04060	Cytokine-cytokine receptor interaction	0.0185530584546492	FAS, FASLG	0.0219263418100399
Autoimmune lymphoproliferative syndrome	hsa05200	Pathways in cancer	0.0275046860560322	FAS, FASLG	0.0297967432273682
Autoimmune lymphoproliferative syndrome	hsa04930	Type II diabetes mellitus	0.0402428773338785	PRKCD	0.0402428773338785
Osteogenesis imperfecta type 1	hsa04974	Protein digestion and absorption	0.00018815717814408	COL1A1, COL1A2	0.000414642670354547
Osteogenesis imperfecta type 1	hsa04512	ECM-receptor interaction	0.000207321335177273	COL1A1, COL1A2	0.000414642670354547
Osteogenesis imperfecta type 1	hsa05146	Amoebiasis	0.000323177375423396	COL1A1, COL1A2	0.000430903167231195
Osteogenesis imperfecta type 1	hsa04510	Focal adhesion	0.00115565674230469	COL1A1, COL1A2	0.00115565674230469
Osteogenesis imperfecta type 2	hsa04974	Protein digestion and absorption	0.00018815717814408	COL1A1, COL1A2	0.000414642670354547
Osteogenesis imperfecta type 2	hsa04512	ECM-receptor interaction	0.000207321335177273	COL1A1, COL1A2	0.000414642670354547
Osteogenesis imperfecta type 2	hsa05146	Amoebiasis	0.000323177375423396	COL1A1, COL1A2	0.000430903167231195
Osteogenesis imperfecta type 2	hsa04510	Focal adhesion	0.00115565674230469	COL1A1, COL1A2	0.00115565674230469
Osteogenesis imperfecta type 3	hsa04974	Protein digestion and absorption	0.00110877562695871	COL1A1, COL1A2	0.00378707239543761
Osteogenesis imperfecta type 3	hsa04512	ECM-receptor interaction	0.00122058733684683	COL1A1, COL1A2	0.00378707239543761
Osteogenesis imperfecta type 3	hsa04916	Melanogenesis	0.00172027692077606	CREB3L1, WNT1	0.00378707239543761
Osteogenesis imperfecta type 3	hsa05146	Amoebiasis	0.0018935361977188	COL1A1, COL1A2	0.00378707239543761
Osteogenesis imperfecta type 3	hsa04510	Focal adhesion	0.00662586023535485	COL1A1, COL1A2	0.0106013763765678
Osteogenesis imperfecta type 3	hsa04962	Vasopressin-regulated water reabsorption	0.0296600197894691	CREB3L1	0.0376333269983061
Osteogenesis imperfecta type 3	hsa05217	Basal cell carcinoma	0.0369707681872896	WNT1	0.0376333269983061
Osteogenesis imperfecta type 3	hsa04340	Hedgehog signaling pathway	0.0376333269983061	WNT1	0.0376333269983061
Osteogenesis imperfecta type 4	hsa04974	Protein digestion and absorption	0.000559404407425804	COL1A1, COL1A2	0.00184829426222044
Osteogenesis imperfecta type 4	hsa04512	ECM-receptor interaction	0.000616098087406812	COL1A1, COL1A2	0.00184829426222044
Osteogenesis imperfecta type 4	hsa05146	Amoebiasis	0.000958074670315177	COL1A1, COL1A2	0.00191614934063035
Osteogenesis imperfecta type 4	hsa04510	Focal adhesion	0.00338896782876295	COL1A1, COL1A2	0.00508345174314442
Osteogenesis imperfecta type 4	hsa05217	Basal cell carcinoma	0.0278558812917985	WNT1	0.0283575036440731
Osteogenesis imperfecta type 4	hsa04340	Hedgehog signaling pathway	0.0283575036440731	WNT1	0.0283575036440731
Familial glucocorticoid deficiency	hsa00450	Selenocompound metabolism	0.00866605200289927	TXNRD2	0.0183297352577279
Familial glucocorticoid deficiency	hsa00760	Nicotinate and nicotinamide metabolism	0.0122198235051519	NNT	0.0183297352577279
Familial glucocorticoid deficiency	hsa00240	Pyrimidine metabolism	0.0497643913421941	TXNRD2	0.0497643913421941
Fanconi-Bickel Syndrome	hsa04950	Maturity onset diabetes of the young	0.00425966944965073	SLC2A2	0.00817856534332939
Fanconi-Bickel Syndrome	hsa04973	Carbohydrate digestion and absorption	0.00749701823138538	SLC2A2	0.00817856534332939
Fanconi-Bickel Syndrome	hsa04930	Type II diabetes mellitus	0.00817856534332939	SLC2A2	0.00817856534332939
Classic mycosis fungoides	hsa05320	Autoimmune thyroid disease	0.0002297026902539	CTLA4, CD28	0.0025267295927929
Classic mycosis fungoides	hsa05323	Rheumatoid arthritis	0.000706214345887527	CTLA4, CD28	0.0036465591973654
Classic mycosis fungoides	hsa04660	T cell receptor signaling pathway	0.000994516144736019	CTLA4, CD28	0.0036465591973654
Classic mycosis fungoides	hsa04514	Cell adhesion molecules (CAMs)	0.00150653531277334	CTLA4, CD28	0.00414297211012667
Classic mycosis fungoides	hsa05330	Allograft rejection	0.0187971328254781	CD28	0.032819256200243
Classic mycosis fungoides	hsa05332	Graft-versus-host disease	0.0208150301595429	CD28	0.032819256200243
Classic mycosis fungoides	hsa04940	Type I diabetes mellitus	0.0218229405169009	CD28	0.032819256200243
Classic mycosis fungoides	hsa04672	Intestinal immune network for IgA production	0.0243396899124961	CD28	0.032819256200243
Classic mycosis fungoides	hsa05014	Amyotrophic lateral sclerosis (ALS)	0.0268521187092897	TNFRSF1B	0.032819256200243
Classic mycosis fungoides	hsa04920	Adipocytokine signaling pathway	0.0343635186254103	TNFRSF1B	0.0353621085157666
Classic mycosis fungoides	hsa05416	Viral myocarditis	0.0353621085157666	CD28	0.0353621085157666
Mucopolysaccharidosis type 2, attenuated form	hsa00531	Glycosaminoglycan degradation	0.00323734878173465	IDS	0.0064746975634693
Mucopolysaccharidosis type 2, attenuated form	hsa04142	Lysosome	0.0206168001363094	IDS	0.0206168001363094
Mucopolysaccharidosis type 2, severe form	hsa00531	Glycosaminoglycan degradation	0.00323734878173465	IDS	0.0064746975634693
Mucopolysaccharidosis type 2, severe form	hsa04142	Lysosome	0.0206168001363094	IDS	0.0206168001363094
Stargardt disease	hsa02010	ABC transporters	0.0149390992126086	ABCA4	0.0179809735926045
Stargardt disease	hsa05014	Amyotrophic lateral sclerosis (ALS)	0.0179809735926045	PRPH2	0.0179809735926045
Cerebellar ataxia-areflexia-pes cavus-optic atrophy-sensorineural hearing loss syndrome	hsa04964	Proximal tubule bicarbonate reclamation	0.00391889589367878	ATP1A3	0.0170599761458513
Cerebellar ataxia-areflexia-pes cavus-optic atrophy-sensorineural hearing loss syndrome	hsa04960	Aldosterone-regulated sodium reabsorption	0.0071562446754132	ATP1A3	0.0170599761458513
Cerebellar ataxia-areflexia-pes cavus-optic atrophy-sensorineural hearing loss syndrome	hsa04973	Carbohydrate digestion and absorption	0.00749701823138538	ATP1A3	0.0170599761458513
Cerebellar ataxia-areflexia-pes cavus-optic atrophy-sensorineural hearing loss syndrome	hsa04976	Bile secretion	0.0120974612370082	ATP1A3	0.0170599761458513
Cerebellar ataxia-areflexia-pes cavus-optic atrophy-sensorineural hearing loss syndrome	hsa04971	Gastric acid secretion	0.012608621570966	ATP1A3	0.0170599761458513
Cerebellar ataxia-areflexia-pes cavus-optic atrophy-sensorineural hearing loss syndrome	hsa04260	Cardiac muscle contraction	0.0131197819049241	ATP1A3	0.0170599761458513
Cerebellar ataxia-areflexia-pes cavus-optic atrophy-sensorineural hearing loss syndrome	hsa04974	Protein digestion and absorption	0.0138013290168684	ATP1A3	0.0170599761458513
Cerebellar ataxia-areflexia-pes cavus-optic atrophy-sensorineural hearing loss syndrome	hsa04970	Salivary secretion	0.0151644232407567	ATP1A3	0.0170599761458513
Cerebellar ataxia-areflexia-pes cavus-optic atrophy-sensorineural hearing loss syndrome	hsa04972	Pancreatic secretion	0.0172090645765888	ATP1A3	0.0172090645765888
Wiskott-Aldrich syndrome	hsa05130	Pathogenic Escherichia coli infection	0.00954165956721764	WAS	0.0217669108877152
Wiskott-Aldrich syndrome	hsa05131	Shigellosis	0.0103935934571479	WAS	0.0217669108877152
Wiskott-Aldrich syndrome	hsa05100	Bacterial invasion of epithelial cells	0.011927074459022	WAS	0.0217669108877152
Wiskott-Aldrich syndrome	hsa04520	Adherens junction	0.0124382347929801	WAS	0.0217669108877152
Wiskott-Aldrich syndrome	hsa04666	Fc gamma R-mediated phagocytosis	0.0160163571306866	WAS	0.0224228999829613
Wiskott-Aldrich syndrome	hsa04062	Chemokine signaling pathway	0.0322031010393593	WAS	0.0362923837110242
Wiskott-Aldrich syndrome	hsa04810	Regulation of actin cytoskeleton	0.0362923837110242	WAS	0.0362923837110242
17p13.3 microduplication syndrome	hsa00565	Ether lipid metabolism	0.0122312618970216	PAFAH1B1	0.042813597910201
17p13.3 microduplication syndrome	hsa04114	Oocyte meiosis	0.0378056552382087	YWHAE	0.042813597910201
17p13.3 microduplication syndrome	hsa04110	Cell cycle	0.0418130546934588	YWHAE	0.042813597910201
17p13.3 microduplication syndrome	hsa04722	Neurotrophin signaling pathway	0.042813597910201	YWHAE	0.042813597910201
Williams syndrome	hsa03022	Basal transcription factors	0.000361638622269044	GTF2I, GTF2IRD1	0.00144655448907618
Williams syndrome	hsa03430	Mismatch repair	0.0194480792641036	RFC2	0.0369396377143223
Williams syndrome	hsa03030	DNA replication	0.0303058731118667	RFC2	0.0369396377143223
Williams syndrome	hsa03420	Nucleotide excision repair	0.0369396377143223	RFC2	0.0369396377143223
Histidinemia	hsa00910	Nitrogen metabolism	0.00391889589367878	HAL	0.00494121656159496
Histidinemia	hsa00340	Histidine metabolism	0.00494121656159496	HAL	0.00494121656159496
Limited cutaneous systemic sclerosis	hsa05416	Viral myocarditis	0.000828532448312036	CAV1, HLA-DRB1	0.00828532448312036
Limited cutaneous systemic sclerosis	hsa05310	Asthma	0.0202953239873886	HLA-DRB1	0.046213460234112
Limited cutaneous systemic sclerosis	hsa05330	Allograft rejection	0.0249861042004281	HLA-DRB1	0.046213460234112
Limited cutaneous systemic sclerosis	hsa05332	Graft-versus-host disease	0.0276589755675655	HLA-DRB1	0.046213460234112
Limited cutaneous systemic sclerosis	hsa04940	Type I diabetes mellitus	0.0289933485560712	HLA-DRB1	0.046213460234112
Limited cutaneous systemic sclerosis	hsa04672	Intestinal immune network for IgA production	0.0323232724021314	HLA-DRB1	0.046213460234112
Limited cutaneous systemic sclerosis	hsa05320	Autoimmune thyroid disease	0.0349810389587348	HLA-DRB1	0.046213460234112
Limited cutaneous systemic sclerosis	hsa05150	Staphylococcus aureus infection	0.0369707681872896	HLA-DRB1	0.046213460234112
Limited cutaneous systemic sclerosis	hsa05100	Bacterial invasion of epithelial cells	0.0468733005382516	CAV1	0.0481878445853614
Limited cutaneous systemic sclerosis	hsa05140	Leishmaniasis	0.0481878445853614	HLA-DRB1	0.0481878445853614
Saccharopinuria	hsa00300	Lysine biosynthesis	0.000511160333958149	AASS	0.0010223206679163
Saccharopinuria	hsa00310	Lysine degradation	0.00749701823138538	AASS	0.00749701823138538
Limited systemic sclerosis	hsa05310	Asthma	0.00511160333958083	HLA-DRB1	0.0206735957289713
Limited systemic sclerosis	hsa05330	Allograft rejection	0.00630431078548299	HLA-DRB1	0.0206735957289713
Limited systemic sclerosis	hsa05332	Graft-versus-host disease	0.00698585789742723	HLA-DRB1	0.0206735957289713
Limited systemic sclerosis	hsa04940	Type I diabetes mellitus	0.00732663145339929	HLA-DRB1	0.0206735957289713
Limited systemic sclerosis	hsa04672	Intestinal immune network for IgA production	0.00817856534332939	HLA-DRB1	0.0206735957289713
Limited systemic sclerosis	hsa05320	Autoimmune thyroid disease	0.00886011245527352	HLA-DRB1	0.0206735957289713
Limited systemic sclerosis	hsa05150	Staphylococcus aureus infection	0.00937127278923144	HLA-DRB1	0.0206735957289713
Limited systemic sclerosis	hsa05416	Viral myocarditis	0.011927074459022	HLA-DRB1	0.0206735957289713
Limited systemic sclerosis	hsa05140	Leishmaniasis	0.012267848014994	HLA-DRB1	0.0206735957289713
Limited systemic sclerosis	hsa04612	Antigen processing and presentation	0.012949395126938	HLA-DRB1	0.0206735957289713
Limited systemic sclerosis	hsa04640	Hematopoietic cell lineage	0.0149940364627703	HLA-DRB1	0.0206735957289713
Limited systemic sclerosis	hsa05323	Rheumatoid arthritis	0.0155051967967285	HLA-DRB1	0.0206735957289713
Limited systemic sclerosis	hsa05145	Toxoplasmosis	0.0224910546941557	HLA-DRB1	0.0247174419265063
Limited systemic sclerosis	hsa04514	Cell adhesion molecules (CAMs)	0.0226614414721419	HLA-DRB1	0.0247174419265063
Limited systemic sclerosis	hsa05322	Systemic lupus erythematosus	0.0231726018060997	HLA-DRB1	0.0247174419265063
Limited systemic sclerosis	hsa04145	Phagosome	0.0260691770318624	HLA-DRB1	0.0260691770318624
Semilobar holoprosencephaly	hsa04340	Hedgehog signaling pathway	8.07009809253813e-09	PTCH1, SHH, ZIC2, GLI2, GAS1	4.03504904626907e-08
Semilobar holoprosencephaly	hsa05200	Pathways in cancer	5.37078691146e-05	FGFR1, PTCH1, SHH, GLI2, FGF8	0.000104790372210277
Semilobar holoprosencephaly	hsa05217	Basal cell carcinoma	6.28742233261664e-05	PTCH1, SHH, GLI2	0.000104790372210277
Semilobar holoprosencephaly	hsa05218	Melanoma	0.00491742245062837	FGFR1, FGF8	0.00614677806328546
Semilobar holoprosencephaly	hsa04810	Regulation of actin cytoskeleton	0.0398889992969835	FGFR1, FGF8	0.0398889992969835
Hyperlysinemia	hsa00300	Lysine biosynthesis	0.000511160333958149	AASS	0.0010223206679163
Hyperlysinemia	hsa00310	Lysine degradation	0.00749701823138538	AASS	0.00749701823138538
Diffuse cutaneous systemic sclerosis	hsa05416	Viral myocarditis	0.000828532448312036	CAV1, HLA-DRB1	0.00828532448312036
Diffuse cutaneous systemic sclerosis	hsa05310	Asthma	0.0202953239873886	HLA-DRB1	0.046213460234112
Diffuse cutaneous systemic sclerosis	hsa05330	Allograft rejection	0.0249861042004281	HLA-DRB1	0.046213460234112
Diffuse cutaneous systemic sclerosis	hsa05332	Graft-versus-host disease	0.0276589755675655	HLA-DRB1	0.046213460234112
Diffuse cutaneous systemic sclerosis	hsa04940	Type I diabetes mellitus	0.0289933485560712	HLA-DRB1	0.046213460234112
Diffuse cutaneous systemic sclerosis	hsa04672	Intestinal immune network for IgA production	0.0323232724021314	HLA-DRB1	0.046213460234112
Diffuse cutaneous systemic sclerosis	hsa05320	Autoimmune thyroid disease	0.0349810389587348	HLA-DRB1	0.046213460234112
Diffuse cutaneous systemic sclerosis	hsa05150	Staphylococcus aureus infection	0.0369707681872896	HLA-DRB1	0.046213460234112
Diffuse cutaneous systemic sclerosis	hsa05100	Bacterial invasion of epithelial cells	0.0468733005382516	CAV1	0.0481878445853614
Diffuse cutaneous systemic sclerosis	hsa05140	Leishmaniasis	0.0481878445853614	HLA-DRB1	0.0481878445853614
Tangier disease, 205400 (3)	hsa02010	ABC transporters	0.00749701823138538	ABCA1	0.00783779178735711
Tangier disease, 205400 (3)	hsa04975	Fat digestion and absorption	0.00783779178735711	ABCA1	0.00783779178735711
Bleeding diathesis due to thromboxane synthesis deficiency	hsa04020	Calcium signaling pathway	0.0301584597035269	TBXA2R	0.0463452036121997
Bleeding diathesis due to thromboxane synthesis deficiency	hsa04080	Neuroactive ligand-receptor interaction	0.0463452036121997	TBXA2R	0.0463452036121997
Methylcobalamin deficiency type cblG	hsa00450	Selenocompound metabolism	0.0028965752257627	MTR	0.00460044300562285
Methylcobalamin deficiency type cblG	hsa00670	One carbon pool by folate	0.00306696200374856	MTR	0.00460044300562285
Methylcobalamin deficiency type cblG	hsa00270	Cysteine and methionine metabolism	0.00613392400749713	MTR	0.00613392400749713
Phosphoenolpyruvate carboxykinase deficiency	hsa04964	Proximal tubule bicarbonate reclamation	1.46925203921149e-05	PCK1, PCK2	0.000101047373447747
Phosphoenolpyruvate carboxykinase deficiency	hsa00020	Citrate cycle (TCA cycle)	2.52618433619367e-05	PCK1, PCK2	0.000101047373447747
Phosphoenolpyruvate carboxykinase deficiency	hsa00620	Pyruvate metabolism	4.52970984420934e-05	PCK1, PCK2	0.000120792262512249
Phosphoenolpyruvate carboxykinase deficiency	hsa00010	Glycolysis / Gluconeogenesis	0.000120792262512249	PCK1, PCK2	0.000186995714081463
Phosphoenolpyruvate carboxykinase deficiency	hsa04920	Adipocytokine signaling pathway	0.000132290756732165	PCK1, PCK2	0.000186995714081463
Phosphoenolpyruvate carboxykinase deficiency	hsa03320	PPAR signaling pathway	0.000140246785561097	PCK1, PCK2	0.000186995714081463
Phosphoenolpyruvate carboxykinase deficiency	hsa04910	Insulin signaling pathway	0.000548965989196294	PCK1, PCK2	0.000627389701938621
Phosphoenolpyruvate carboxykinase deficiency	hsa01100	Metabolic pathways	0.0370440251791471	PCK1, PCK2	0.0370440251791471
D-glyceric aciduria	hsa00630	Glyoxylate and dicarboxylate metabolism	0.00306696200374856	GLYCTK	0.00817856534332934
D-glyceric aciduria	hsa00260	Glycine, serine and threonine metabolism	0.00545237689555289	GLYCTK	0.00817856534332934
D-glyceric aciduria	hsa00561	Glycerolipid metabolism	0.00851933889930134	GLYCTK	0.00851933889930134
Laron syndrome with immunodeficiency	hsa05221	Acute myeloid leukemia	0.00971204634520362	STAT5B	0.0247060828079739
Laron syndrome with immunodeficiency	hsa05220	Chronic myeloid leukemia	0.0124382347929801	STAT5B	0.0247060828079739
Laron syndrome with immunodeficiency	hsa04012	ErbB signaling pathway	0.0148236496847843	STAT5B	0.0247060828079739
Laron syndrome with immunodeficiency	hsa04630	Jak-STAT signaling pathway	0.0264099505878344	STAT5B	0.0322031010393593
Laron syndrome with immunodeficiency	hsa04062	Chemokine signaling pathway	0.0322031010393593	STAT5B	0.0322031010393593
Achondroplasia	hsa05219	Bladder cancer	0.0071562446754132	FGFR3	0.0286249787016528
Achondroplasia	hsa04144	Endocytosis	0.0342477423751917	FGFR3	0.0456636565002557
Achondroplasia	hsa04810	Regulation of actin cytoskeleton	0.0362923837110242	FGFR3	0.0456636565002557
Achondroplasia	hsa04010	MAPK signaling pathway	0.0456636565002557	FGFR3	0.0456636565002557
Cystathioninuria	hsa00450	Selenocompound metabolism	0.0028965752257627	CTH	0.00613392400749713
Cystathioninuria	hsa00910	Nitrogen metabolism	0.00391889589367878	CTH	0.00613392400749713
Cystathioninuria	hsa00260	Glycine, serine and threonine metabolism	0.00545237689555289	CTH	0.00613392400749713
Cystathioninuria	hsa00270	Cysteine and methionine metabolism	0.00613392400749713	CTH	0.00613392400749713
Joubert syndrome with ocular defect	hsa00562	Inositol phosphate metabolism	0.00971204634520362	INPP5E	0.0132901686829102
Joubert syndrome with ocular defect	hsa04070	Phosphatidylinositol signaling system	0.0132901686829102	INPP5E	0.0132901686829102
Hereditary breast and ovarian cancer syndrome	hsa03440	Homologous recombination	8.13695437581676e-15	RAD51, BRCA2, MRE11, NBN, RAD51C, RAD50, RAD51D	8.95064981339844e-14
Hereditary breast and ovarian cancer syndrome	hsa04115	p53 signaling pathway	0.000229715342420686	PTEN, CHEK2, TP53	0.000688586147748186
Hereditary breast and ovarian cancer syndrome	hsa03450	Non-homologous end-joining	0.000246345734816995	MRE11, RAD50	0.000688586147748186
Hereditary breast and ovarian cancer syndrome	hsa05212	Pancreatic cancer	0.000250394962817522	RAD51, BRCA2, TP53	0.000688586147748186
Hereditary breast and ovarian cancer syndrome	hsa05200	Pathways in cancer	0.00225819624115601	PTEN, RAD51, BRCA2, TP53	0.00496803173054323
Hereditary breast and ovarian cancer syndrome	hsa05213	Endometrial cancer	0.00402405920583393	PTEN, TP53	0.0073774418773622
Hereditary breast and ovarian cancer syndrome	hsa05214	Glioma	0.0062288531636206	PTEN, TP53	0.00978819782854666
Hereditary breast and ovarian cancer syndrome	hsa05218	Melanoma	0.00739614438225436	PTEN, TP53	0.0101696985255998
Hereditary breast and ovarian cancer syndrome	hsa05222	Small cell lung cancer	0.0104743576198495	PTEN, TP53	0.0125868644602788
Hereditary breast and ovarian cancer syndrome	hsa05215	Prostate cancer	0.0114426040547989	PTEN, TP53	0.0125868644602788
Hereditary breast and ovarian cancer syndrome	hsa04110	Cell cycle	0.0214997025476894	CHEK2, TP53	0.0214997025476894
Lymphangioleiomyomatosis	hsa04150	mTOR signaling pathway	7.70050673515587e-05	TSC1, TSC2	0.000231015202054676
Lymphangioleiomyomatosis	hsa04910	Insulin signaling pathway	0.000548965989196294	TSC1, TSC2	0.00082344898379444
Lymphangioleiomyomatosis	hsa04115	p53 signaling pathway	0.0230403110493677	TSC2	0.0230403110493677
Isolated succinate-CoQ reductase deficiency	hsa00020	Citrate cycle (TCA cycle)	1.20561038713862e-07	SDHA, SDHB, SDHD	7.23366232283171e-07
Isolated succinate-CoQ reductase deficiency	hsa05012	Parkinson's disease	1.06236249286382e-05	SDHA, SDHB, SDHD	2.22509353519879e-05
Isolated succinate-CoQ reductase deficiency	hsa00190	Oxidative phosphorylation	1.1125467675994e-05	SDHA, SDHB, SDHD	2.22509353519879e-05
Isolated succinate-CoQ reductase deficiency	hsa05010	Alzheimer's disease	2.26380075538685e-05	SDHA, SDHB, SDHD	3.39570113308027e-05
Isolated succinate-CoQ reductase deficiency	hsa05016	Huntington's disease	2.98353233960634e-05	SDHA, SDHB, SDHD	3.58023880752761e-05
Isolated succinate-CoQ reductase deficiency	hsa01100	Metabolic pathways	0.00712215108267904	SDHA, SDHB, SDHD	0.00712215108267904
Fumaric aciduria	hsa00020	Citrate cycle (TCA cycle)	0.00511160333958083	FH	0.0102232066791617
Fumaric aciduria	hsa05211	Renal cell carcinoma	0.011927074459022	FH	0.011927074459022
Fatal infantile cytochrome C oxidase deficiency	hsa00860	Porphyrin and chlorophyll metabolism	0.00732663145339929	COX15	0.0146532629067986
Fatal infantile cytochrome C oxidase deficiency	hsa00190	Oxidative phosphorylation	0.0224910546941557	COX15	0.0224910546941557
Isolated complex III deficiency	hsa04260	Cardiac muscle contraction	2.74021689095046e-08	UQCRQ, UQCRB, UQCRC2, CYC1	1.64413013457028e-07
Isolated complex III deficiency	hsa05012	Parkinson's disease	2.30003471861073e-07	UQCRQ, UQCRB, UQCRC2, CYC1	4.89323331129637e-07
Isolated complex III deficiency	hsa00190	Oxidative phosphorylation	2.44661665564818e-07	UQCRQ, UQCRB, UQCRC2, CYC1	4.89323331129637e-07
Isolated complex III deficiency	hsa05010	Alzheimer's disease	6.32907132430011e-07	UQCRQ, UQCRB, UQCRC2, CYC1	9.49360698645017e-07
Isolated complex III deficiency	hsa05016	Huntington's disease	9.15506002606787e-07	UQCRQ, UQCRB, UQCRC2, CYC1	1.09860720312814e-06
Isolated complex III deficiency	hsa01100	Metabolic pathways	0.00136833690251948	UQCRQ, UQCRB, UQCRC2, CYC1	0.00136833690251948
Glanzmann thrombasthenia	hsa05412	Arrhythmogenic right ventricular cardiomyopathy (ARVC)	0.000156855721656531	ITGA2B, ITGB3	0.000418649721370578
Glanzmann thrombasthenia	hsa05410	Hypertrophic cardiomyopathy (HCM)	0.000197623110254415	ITGA2B, ITGB3	0.000418649721370578
Glanzmann thrombasthenia	hsa04512	ECM-receptor interaction	0.000207321335177273	ITGA2B, ITGB3	0.000418649721370578
Glanzmann thrombasthenia	hsa04640	Hematopoietic cell lineage	0.000222304221585043	ITGA2B, ITGB3	0.000418649721370578
Glanzmann thrombasthenia	hsa05414	Dilated cardiomyopathy	0.00023258317853921	ITGA2B, ITGB3	0.000418649721370578
Glanzmann thrombasthenia	hsa04510	Focal adhesion	0.00115565674230469	ITGA2B, ITGB3	0.0016857987175147
Glanzmann thrombasthenia	hsa04810	Regulation of actin cytoskeleton	0.00131117678028921	ITGA2B, ITGB3	0.0016857987175147
Glanzmann thrombasthenia	hsa05222	Small cell lung cancer	0.0287584309224475	ITGA2B	0.0323532347877534
Glanzmann thrombasthenia	hsa04380	Osteoclast differentiation	0.0431469961693753	ITGB3	0.0431469961693753
Combined immunodeficiency with faciooculoskeletal anomalies	hsa04960	Aldosterone-regulated sodium reabsorption	0.0071562446754132	PIK3CD	0.0252740387345946
Combined immunodeficiency with faciooculoskeletal anomalies	hsa04973	Carbohydrate digestion and absorption	0.00749701823138538	PIK3CD	0.0252740387345946
Combined immunodeficiency with faciooculoskeletal anomalies	hsa04930	Type II diabetes mellitus	0.00817856534332939	PIK3CD	0.0252740387345946
Combined immunodeficiency with faciooculoskeletal anomalies	hsa04150	mTOR signaling pathway	0.00886011245527352	PIK3CD	0.0252740387345946
Combined immunodeficiency with faciooculoskeletal anomalies	hsa05213	Endometrial cancer	0.00886011245527352	PIK3CD	0.0252740387345946
Combined immunodeficiency with faciooculoskeletal anomalies	hsa05223	Non-small cell lung cancer	0.00920088601124547	PIK3CD	0.0252740387345946
Combined immunodeficiency with faciooculoskeletal anomalies	hsa05221	Acute myeloid leukemia	0.00971204634520362	PIK3CD	0.0252740387345946
Combined immunodeficiency with faciooculoskeletal anomalies	hsa00562	Inositol phosphate metabolism	0.00971204634520362	PIK3CD	0.0252740387345946
Combined immunodeficiency with faciooculoskeletal anomalies	hsa05210	Colorectal cancer	0.0105639802351337	PIK3CD	0.0252740387345946
Combined immunodeficiency with faciooculoskeletal anomalies	hsa05214	Glioma	0.0110751405690919	PIK3CD	0.0252740387345946
Combined immunodeficiency with faciooculoskeletal anomalies	hsa05100	Bacterial invasion of epithelial cells	0.011927074459022	PIK3CD	0.0252740387345946
Combined immunodeficiency with faciooculoskeletal anomalies	hsa05211	Renal cell carcinoma	0.011927074459022	PIK3CD	0.0252740387345946
Combined immunodeficiency with faciooculoskeletal anomalies	hsa05212	Pancreatic cancer	0.011927074459022	PIK3CD	0.0252740387345946
Combined immunodeficiency with faciooculoskeletal anomalies	hsa05218	Melanoma	0.0120974612370082	PIK3CD	0.0252740387345946
Combined immunodeficiency with faciooculoskeletal anomalies	hsa05220	Chronic myeloid leukemia	0.0124382347929801	PIK3CD	0.0252740387345946
Combined immunodeficiency with faciooculoskeletal anomalies	hsa04662	B cell receptor signaling pathway	0.0127790083489521	PIK3CD	0.0252740387345946
Combined immunodeficiency with faciooculoskeletal anomalies	hsa04370	VEGF signaling pathway	0.012949395126938	PIK3CD	0.0252740387345946
Combined immunodeficiency with faciooculoskeletal anomalies	hsa04070	Phosphatidylinositol signaling system	0.0132901686829102	PIK3CD	0.0252740387345946
Combined immunodeficiency with faciooculoskeletal anomalies	hsa04664	Fc epsilon RI signaling pathway	0.0134605554608964	PIK3CD	0.0252740387345946
Combined immunodeficiency with faciooculoskeletal anomalies	hsa05222	Small cell lung cancer	0.0144828761288124	PIK3CD	0.0252740387345946
Combined immunodeficiency with faciooculoskeletal anomalies	hsa04914	Progesterone-mediated oocyte maturation	0.0146532629067984	PIK3CD	0.0252740387345946
Combined immunodeficiency with faciooculoskeletal anomalies	hsa04012	ErbB signaling pathway	0.0148236496847843	PIK3CD	0.0252740387345946
Combined immunodeficiency with faciooculoskeletal anomalies	hsa04210	Apoptosis	0.0148236496847843	PIK3CD	0.0252740387345946
Combined immunodeficiency with faciooculoskeletal anomalies	hsa05215	Prostate cancer	0.0151644232407567	PIK3CD	0.0252740387345946
Combined immunodeficiency with faciooculoskeletal anomalies	hsa04666	Fc gamma R-mediated phagocytosis	0.0160163571306866	PIK3CD	0.0253817545137809
Combined immunodeficiency with faciooculoskeletal anomalies	hsa04620	Toll-like receptor signaling pathway	0.0173794513545749	PIK3CD	0.0253817545137809
Combined immunodeficiency with faciooculoskeletal anomalies	hsa05142	Chagas disease (American trypanosomiasis)	0.0177202249105469	PIK3CD	0.0253817545137809
Combined immunodeficiency with faciooculoskeletal anomalies	hsa05146	Amoebiasis	0.0180609984665191	PIK3CD	0.0253817545137809
Combined immunodeficiency with faciooculoskeletal anomalies	hsa04660	T cell receptor signaling pathway	0.0184017720224912	PIK3CD	0.0253817545137809
Combined immunodeficiency with faciooculoskeletal anomalies	hsa04670	Leukocyte transendothelial migration	0.0197648662463792	PIK3CD	0.0261259726245244
Combined immunodeficiency with faciooculoskeletal anomalies	hsa04722	Neurotrophin signaling pathway	0.0216391208042256	PIK3CD	0.0261259726245244
Combined immunodeficiency with faciooculoskeletal anomalies	hsa04380	Osteoclast differentiation	0.0218095075822118	PIK3CD	0.0261259726245244
Combined immunodeficiency with faciooculoskeletal anomalies	hsa05145	Toxoplasmosis	0.0224910546941557	PIK3CD	0.0261259726245244
Combined immunodeficiency with faciooculoskeletal anomalies	hsa05160	Hepatitis C	0.0228318282501278	PIK3CD	0.0261259726245244
Combined immunodeficiency with faciooculoskeletal anomalies	hsa04650	Natural killer cell mediated cytotoxicity	0.0231726018060997	PIK3CD	0.0261259726245244
Combined immunodeficiency with faciooculoskeletal anomalies	hsa04910	Insulin signaling pathway	0.023513375362072	PIK3CD	0.0261259726245244
Combined immunodeficiency with faciooculoskeletal anomalies	hsa04630	Jak-STAT signaling pathway	0.0264099505878344	PIK3CD	0.0285512979327939
Combined immunodeficiency with faciooculoskeletal anomalies	hsa04062	Chemokine signaling pathway	0.0322031010393593	PIK3CD	0.0338980010940624
Combined immunodeficiency with faciooculoskeletal anomalies	hsa04510	Focal adhesion	0.0340773555972058	PIK3CD	0.0349511339458521
Combined immunodeficiency with faciooculoskeletal anomalies	hsa04810	Regulation of actin cytoskeleton	0.0362923837110242	PIK3CD	0.0362923837110242
Fundus albipunctatus	hsa05014	Amyotrophic lateral sclerosis (ALS)	0.0179809735926045	PRPH2	0.0216924320046997
Fundus albipunctatus	hsa00830	Retinol metabolism	0.0216924320046997	RDH5	0.0216924320046997
Burkitt lymphoma	hsa05216	Thyroid cancer	0.00494121656159496	MYC	0.0214119384335774
Burkitt lymphoma	hsa05219	Bladder cancer	0.0071562446754132	MYC	0.0214119384335774
Burkitt lymphoma	hsa05213	Endometrial cancer	0.00886011245527352	MYC	0.0214119384335774
Burkitt lymphoma	hsa05221	Acute myeloid leukemia	0.00971204634520362	MYC	0.0214119384335774
Burkitt lymphoma	hsa05210	Colorectal cancer	0.0105639802351337	MYC	0.0214119384335774
Burkitt lymphoma	hsa05220	Chronic myeloid leukemia	0.0124382347929801	MYC	0.0214119384335774
Burkitt lymphoma	hsa04350	TGF-beta signaling pathway	0.0143124893508263	MYC	0.0214119384335774
Burkitt lymphoma	hsa05222	Small cell lung cancer	0.0144828761288124	MYC	0.0214119384335774
Burkitt lymphoma	hsa04012	ErbB signaling pathway	0.0148236496847843	MYC	0.0214119384335774
Burkitt lymphoma	hsa04110	Cell cycle	0.0211279604702675	MYC	0.0274663486113478
Burkitt lymphoma	hsa04310	Wnt signaling pathway	0.0255580166979043	MYC	0.0286107798034872
Burkitt lymphoma	hsa04630	Jak-STAT signaling pathway	0.0264099505878344	MYC	0.0286107798034872
Burkitt lymphoma	hsa04010	MAPK signaling pathway	0.0456636565002557	MYC	0.0456636565002557
T-B+ severe combined immunodeficiency due to gamma chain deficiency	hsa05340	Primary immunodeficiency	0.00596353722951104	IL2RG	0.0238541489180442
T-B+ severe combined immunodeficiency due to gamma chain deficiency	hsa04630	Jak-STAT signaling pathway	0.0264099505878344	IL2RG	0.0451524961662976
T-B+ severe combined immunodeficiency due to gamma chain deficiency	hsa04144	Endocytosis	0.0342477423751917	IL2RG	0.0451524961662976
T-B+ severe combined immunodeficiency due to gamma chain deficiency	hsa04060	Cytokine-cytokine receptor interaction	0.0451524961662976	IL2RG	0.0451524961662976
Osteosarcoma	hsa04110	Cell cycle	9.20908166751175e-06	CHEK2, RB1, TP53	0.0001565543883477
Osteosarcoma	hsa05219	Bladder cancer	0.000149321290226773	RB1, TP53	0.000965080083272475
Osteosarcoma	hsa05223	Non-small cell lung cancer	0.000247835159560976	RB1, TP53	0.000965080083272475
Osteosarcoma	hsa05214	Glioma	0.0003597826465658	RB1, TP53	0.000965080083272475
Osteosarcoma	hsa04115	p53 signaling pathway	0.000393895897282119	CHEK2, TP53	0.000965080083272475
Osteosarcoma	hsa05212	Pancreatic cancer	0.000417489365915214	RB1, TP53	0.000965080083272475
Osteosarcoma	hsa05218	Melanoma	0.000429541312509403	RB1, TP53	0.000965080083272475
Osteosarcoma	hsa05220	Chronic myeloid leukemia	0.000454155333304694	RB1, TP53	0.000965080083272475
Osteosarcoma	hsa05222	Small cell lung cancer	0.000616098087406812	RB1, TP53	0.00114834908440706
Osteosarcoma	hsa05215	Prostate cancer	0.000675499461415919	RB1, TP53	0.00114834908440706
Osteosarcoma	hsa05200	Pathways in cancer	0.00888949766432845	RB1, TP53	0.013738314572144
Osteosarcoma	hsa05216	Thyroid cancer	0.0147530250283059	TP53	0.0209001187901
Osteosarcoma	hsa05213	Endometrial cancer	0.0263499784196662	TP53	0.0315699987973716
Osteosarcoma	hsa05014	Amyotrophic lateral sclerosis (ALS)	0.0268521187092897	TP53	0.0315699987973716
Osteosarcoma	hsa05217	Basal cell carcinoma	0.0278558812917985	TP53	0.0315699987973716
Osteosarcoma	hsa05210	Colorectal cancer	0.0313636144827795	TP53	0.0333238403879532
Osteosarcoma	hsa04210	Apoptosis	0.0438223409998761	TP53	0.0438223409998761
Fibrosarcoma	hsa04320	Dorso-ventral axis formation	0.00816253713926518	ETV6	0.0163250742785304
Fibrosarcoma	hsa04722	Neurotrophin signaling pathway	0.042813597910201	NTRK3	0.042813597910201
Pseudoxanthoma elasticum	hsa00740	Riboflavin metabolism	0.00374531508952025	ENPP1	0.013604228565442
Pseudoxanthoma elasticum	hsa00770	Pantothenate and CoA biosynthesis	0.00544540811117689	ENPP1	0.013604228565442
Pseudoxanthoma elasticum	hsa00760	Nicotinate and nicotinamide metabolism	0.00816253713926518	ENPP1	0.013604228565442
Pseudoxanthoma elasticum	hsa02010	ABC transporters	0.0149390992126086	ABCC6	0.0183186692688107
Pseudoxanthoma elasticum	hsa00500	Starch and sucrose metabolism	0.0183186692688107	ENPP1	0.0183186692688107
Adrenocortical carcinoma	hsa05216	Thyroid cancer	0.00494121656159496	TP53	0.0212301925370594
Adrenocortical carcinoma	hsa05219	Bladder cancer	0.0071562446754132	TP53	0.0212301925370594
Adrenocortical carcinoma	hsa05213	Endometrial cancer	0.00886011245527352	TP53	0.0212301925370594
Adrenocortical carcinoma	hsa05014	Amyotrophic lateral sclerosis (ALS)	0.00903049923325949	TP53	0.0212301925370594
Adrenocortical carcinoma	hsa05223	Non-small cell lung cancer	0.00920088601124547	TP53	0.0212301925370594
Adrenocortical carcinoma	hsa05217	Basal cell carcinoma	0.00937127278923144	TP53	0.0212301925370594
Adrenocortical carcinoma	hsa05210	Colorectal cancer	0.0105639802351337	TP53	0.0212301925370594
Adrenocortical carcinoma	hsa05214	Glioma	0.0110751405690919	TP53	0.0212301925370594
Adrenocortical carcinoma	hsa04115	p53 signaling pathway	0.01158630090305	TP53	0.0212301925370594
Adrenocortical carcinoma	hsa05212	Pancreatic cancer	0.011927074459022	TP53	0.0212301925370594
Adrenocortical carcinoma	hsa05218	Melanoma	0.0120974612370082	TP53	0.0212301925370594
Adrenocortical carcinoma	hsa05220	Chronic myeloid leukemia	0.0124382347929801	TP53	0.0212301925370594
Adrenocortical carcinoma	hsa05222	Small cell lung cancer	0.0144828761288124	TP53	0.0212301925370594
Adrenocortical carcinoma	hsa04210	Apoptosis	0.0148236496847843	TP53	0.0212301925370594
Adrenocortical carcinoma	hsa05215	Prostate cancer	0.0151644232407567	TP53	0.0212301925370594
Adrenocortical carcinoma	hsa04110	Cell cycle	0.0211279604702675	TP53	0.0266371329584824
Adrenocortical carcinoma	hsa04722	Neurotrophin signaling pathway	0.0216391208042256	TP53	0.0266371329584824
Adrenocortical carcinoma	hsa05160	Hepatitis C	0.0228318282501278	TP53	0.0266371329584824
Adrenocortical carcinoma	hsa04310	Wnt signaling pathway	0.0255580166979043	TP53	0.0282483342450521
Adrenocortical carcinoma	hsa05016	Huntington's disease	0.0311807803714431	TP53	0.0327398193900153
Adrenocortical carcinoma	hsa04010	MAPK signaling pathway	0.0456636565002557	TP53	0.0456636565002557
Kennedy disease	hsa05215	Prostate cancer	0.0151644232407567	AR	0.0190833191344352
Kennedy disease	hsa04114	Oocyte meiosis	0.0190833191344352	AR	0.0190833191344352
Larsen syndrome	hsa04510	Focal adhesion	0.0340773555972058	FLNB	0.0456636565002557
Larsen syndrome	hsa04010	MAPK signaling pathway	0.0456636565002557	FLNB	0.0456636565002557
Isolated microphthalmia-anophthalmia-coloboma	hsa00360	Phenylalanine metabolism	0.0028965752257627	ALDH1A3	0.0124382347929801
Isolated microphthalmia-anophthalmia-coloboma	hsa00340	Histidine metabolism	0.00494121656159496	ALDH1A3	0.0124382347929801
Isolated microphthalmia-anophthalmia-coloboma	hsa00350	Tyrosine metabolism	0.00698585789742723	ALDH1A3	0.0124382347929801
Isolated microphthalmia-anophthalmia-coloboma	hsa00010	Glycolysis / Gluconeogenesis	0.0110751405690919	ALDH1A3	0.0124382347929801
Isolated microphthalmia-anophthalmia-coloboma	hsa00980	Metabolism of xenobiotics by cytochrome P450	0.0120974612370082	ALDH1A3	0.0124382347929801
Isolated microphthalmia-anophthalmia-coloboma	hsa00982	Drug metabolism - cytochrome P450	0.0124382347929801	ALDH1A3	0.0124382347929801
Primary Fanconi syndrome	hsa00410	beta-Alanine metabolism	0.00374850911569258	EHHADH	0.00963902344035263
Primary Fanconi syndrome	hsa00650	Butanoate metabolism	0.00511160333958083	EHHADH	0.00963902344035263
Primary Fanconi syndrome	hsa00640	Propanoate metabolism	0.00545237689555289	EHHADH	0.00963902344035263
Primary Fanconi syndrome	hsa00380	Tryptophan metabolism	0.0071562446754132	EHHADH	0.00963902344035263
Primary Fanconi syndrome	hsa00071	Fatty acid degradation	0.00732663145339929	EHHADH	0.00963902344035263
Primary Fanconi syndrome	hsa00280	Valine, leucine and isoleucine degradation	0.00749701823138538	EHHADH	0.00963902344035263
Primary Fanconi syndrome	hsa00310	Lysine degradation	0.00749701823138538	EHHADH	0.00963902344035263
Primary Fanconi syndrome	hsa03320	PPAR signaling pathway	0.011927074459022	EHHADH	0.0134179587663997
Primary Fanconi syndrome	hsa04146	Peroxisome	0.0134605554608964	EHHADH	0.0134605554608964
Chronic myeloid leukemia	hsa05220	Chronic myeloid leukemia	1.84690008961757e-06	BCR, ABL1, RUNX1	1.2928300627323e-05
Chronic myeloid leukemia	hsa05200	Pathways in cancer	0.000169893071624044	BCR, ABL1, RUNX1	0.000594625750684153
Chronic myeloid leukemia	hsa05130	Pathogenic Escherichia coli infection	0.0283575036440731	ABL1	0.0412557932683944
Chronic myeloid leukemia	hsa05221	Acute myeloid leukemia	0.0288589534099545	RUNX1	0.0412557932683944
Chronic myeloid leukemia	hsa05131	Shigellosis	0.0308630272034426	ABL1	0.0412557932683944
Chronic myeloid leukemia	hsa05416	Viral myocarditis	0.0353621085157666	ABL1	0.0412557932683944
Chronic myeloid leukemia	hsa04012	ErbB signaling pathway	0.0438223409998761	ABL1	0.0438223409998761
Syndromic multisystem autoimmune disease due to Itch deficiency	hsa04120	Ubiquitin mediated proteolysis	0.0230022150281138	ITCH	0.0342477423751917
Syndromic multisystem autoimmune disease due to Itch deficiency	hsa04144	Endocytosis	0.0342477423751917	ITCH	0.0342477423751917
Familial pancreatic carcinoma	hsa05212	Pancreatic cancer	1.24198218516046e-09	BRCA2, CDKN2A, SMAD4, TP53, KRAS	2.48396437032092e-08
Familial pancreatic carcinoma	hsa05220	Chronic myeloid leukemia	3.24397891614757e-07	CDKN2A, SMAD4, TP53, KRAS	3.24397891614757e-06
Familial pancreatic carcinoma	hsa05200	Pathways in cancer	2.94101868795894e-06	BRCA2, CDKN2A, SMAD4, TP53, KRAS	1.96067912530596e-05
Familial pancreatic carcinoma	hsa05219	Bladder cancer	6.7164722489288e-06	CDKN2A, TP53, KRAS	3.3582361244644e-05
Familial pancreatic carcinoma	hsa05223	Non-small cell lung cancer	1.44448091928634e-05	CDKN2A, TP53, KRAS	5.77792367714538e-05
Familial pancreatic carcinoma	hsa05210	Colorectal cancer	2.19568796667861e-05	SMAD4, TP53, KRAS	7.23703218221585e-05
Familial pancreatic carcinoma	hsa05214	Glioma	2.53296126377555e-05	CDKN2A, TP53, KRAS	7.23703218221585e-05
Familial pancreatic carcinoma	hsa05218	Melanoma	3.30668850988812e-05	CDKN2A, TP53, KRAS	8.26672127472029e-05
Familial pancreatic carcinoma	hsa04110	Cell cycle	0.000175772612894131	CDKN2A, SMAD4, TP53	0.000390605806431401
Familial pancreatic carcinoma	hsa05216	Thyroid cancer	0.000349347202311221	TP53, KRAS	0.000698694404622441
Familial pancreatic carcinoma	hsa05213	Endometrial cancer	0.00112907138261751	TP53, KRAS	0.00205285705930456
Familial pancreatic carcinoma	hsa04115	p53 signaling pathway	0.00192557164732582	CDKN2A, TP53	0.00320928607887637
Familial pancreatic carcinoma	hsa05215	Prostate cancer	0.00327853702514959	TP53, KRAS	0.00504390311561475
Familial pancreatic carcinoma	hsa04722	Neurotrophin signaling pathway	0.00658298680978134	TP53, KRAS	0.0094042668711162
Familial pancreatic carcinoma	hsa05160	Hepatitis C	0.00730820262246662	TP53, KRAS	0.00974427016328883
Familial pancreatic carcinoma	hsa04310	Wnt signaling pathway	0.00909790735501397	SMAD4, TP53	0.0113723841937675
Familial pancreatic carcinoma	hsa04320	Dorso-ventral axis formation	0.0242964717929796	KRAS	0.0285840844623289
Familial pancreatic carcinoma	hsa04010	MAPK signaling pathway	0.0275850374239064	TP53, KRAS	0.0297869926704152
Familial pancreatic carcinoma	hsa03440	Homologous recombination	0.0282976430368944	BRCA2	0.0297869926704152
Familial pancreatic carcinoma	hsa04960	Aldosterone-regulated sodium reabsorption	0.0421942366599708	KRAS	0.0421942366599708
Polyvalvular heart disease syndrome	hsa04621	NOD-like receptor signaling pathway	0.0098824331231897	TAB2	0.0269892656329868
Polyvalvular heart disease syndrome	hsa05140	Leishmaniasis	0.012267848014994	TAB2	0.0269892656329868
Polyvalvular heart disease syndrome	hsa04620	Toll-like receptor signaling pathway	0.0173794513545749	TAB2	0.0269892656329868
Polyvalvular heart disease syndrome	hsa04380	Osteoclast differentiation	0.0218095075822118	TAB2	0.0269892656329868
Polyvalvular heart disease syndrome	hsa05145	Toxoplasmosis	0.0224910546941557	TAB2	0.0269892656329868
Polyvalvular heart disease syndrome	hsa04010	MAPK signaling pathway	0.0456636565002557	TAB2	0.0456636565002557
Classic homocystinuria	hsa00260	Glycine, serine and threonine metabolism	0.00545237689555289	CBS	0.00613392400749713
Classic homocystinuria	hsa00270	Cysteine and methionine metabolism	0.00613392400749713	CBS	0.00613392400749713
CLN1 disease	hsa00062	Fatty acid elongation	0.00136309422388825	PPT1	0.0027261884477765
CLN1 disease	hsa04142	Lysosome	0.0206168001363094	PPT1	0.0206168001363094
Leprechaunism	hsa04960	Aldosterone-regulated sodium reabsorption	0.0071562446754132	INSR	0.0163571306866588
Leprechaunism	hsa04930	Type II diabetes mellitus	0.00817856534332939	INSR	0.0163571306866588
Leprechaunism	hsa04520	Adherens junction	0.0124382347929801	INSR	0.0165843130573068
Leprechaunism	hsa04910	Insulin signaling pathway	0.023513375362072	INSR	0.023513375362072
Carnitine palmitoyl transferase II deficiency, myopathic form	hsa00071	Fatty acid degradation	0.00732663145339929	CPT2	0.011927074459022
Carnitine palmitoyl transferase II deficiency, myopathic form	hsa03320	PPAR signaling pathway	0.011927074459022	CPT2	0.011927074459022
Carnitine palmitoyl transferase II deficiency, severe infantile form	hsa00071	Fatty acid degradation	0.00732663145339929	CPT2	0.011927074459022
Carnitine palmitoyl transferase II deficiency, severe infantile form	hsa03320	PPAR signaling pathway	0.011927074459022	CPT2	0.011927074459022
Carnitine palmitoyl transferase II deficiency, neonatal form	hsa00071	Fatty acid degradation	0.00732663145339929	CPT2	0.011927074459022
Carnitine palmitoyl transferase II deficiency, neonatal form	hsa03320	PPAR signaling pathway	0.011927074459022	CPT2	0.011927074459022
Dehydrated hereditary stomatocytosis	hsa04966	Collecting duct acid secretion	0.00918050231694634	SLC4A1	0.027541506950839
Dehydrated hereditary stomatocytosis	hsa04974	Protein digestion and absorption	0.0274145008555924	KCNN4	0.0301014318180526
Dehydrated hereditary stomatocytosis	hsa04970	Salivary secretion	0.0301014318180526	KCNN4	0.0301014318180526
X-linked Alport syndrome-diffuse leiomyomatosis	hsa04974	Protein digestion and absorption	0.00018815717814408	COL4A6, COL4A5	0.000414642670354547
X-linked Alport syndrome-diffuse leiomyomatosis	hsa05222	Small cell lung cancer	0.000207321335177273	COL4A6, COL4A5	0.000414642670354547
X-linked Alport syndrome-diffuse leiomyomatosis	hsa04512	ECM-receptor interaction	0.000207321335177273	COL4A6, COL4A5	0.000414642670354547
X-linked Alport syndrome-diffuse leiomyomatosis	hsa05146	Amoebiasis	0.000323177375423396	COL4A6, COL4A5	0.000484766063135095
X-linked Alport syndrome-diffuse leiomyomatosis	hsa04510	Focal adhesion	0.00115565674230469	COL4A6, COL4A5	0.00138678809076563
X-linked Alport syndrome-diffuse leiomyomatosis	hsa05200	Pathways in cancer	0.00307642793585884	COL4A6, COL4A5	0.00307642793585884
Hb Bart's hydrops fetalis	hsa05143	African trypanosomiasis	3.45535558628789e-05	HBA2, HBA1	6.91071117257579e-05
Hb Bart's hydrops fetalis	hsa05144	Malaria	7.40433339918834e-05	HBA2, HBA1	7.40433339918834e-05
Hemoglobin C disease	hsa05143	African trypanosomiasis	0.00596353722951104	HBB	0.00868972567728732
Hemoglobin C disease	hsa05144	Malaria	0.00868972567728732	HBB	0.00868972567728732
Hemoglobin E disease	hsa05143	African trypanosomiasis	0.00596353722951104	HBB	0.00868972567728732
Hemoglobin E disease	hsa05144	Malaria	0.00868972567728732	HBB	0.00868972567728732
Autosomal dominant Charcot-Marie-Tooth disease type 2M	hsa05100	Bacterial invasion of epithelial cells	0.011927074459022	DNM2	0.0240245356960299
Autosomal dominant Charcot-Marie-Tooth disease type 2M	hsa04666	Fc gamma R-mediated phagocytosis	0.0160163571306866	DNM2	0.0240245356960299
Autosomal dominant Charcot-Marie-Tooth disease type 2M	hsa04144	Endocytosis	0.0342477423751917	DNM2	0.0342477423751917
Hereditary elliptocytosis	hsa05144	Malaria	0.0173054080205831	GYPC	0.0346108160411662
Hereditary elliptocytosis	hsa04530	Tight junction	0.0444800084740419	EPB41	0.0444800084740419
{Melanoma-pancreatic cancer syndrome}, 606719 (3)	hsa05219	Bladder cancer	0.0071562446754132	CDKN2A	0.0142151254776916
{Melanoma-pancreatic cancer syndrome}, 606719 (3)	hsa05223	Non-small cell lung cancer	0.00920088601124547	CDKN2A	0.0142151254776916
{Melanoma-pancreatic cancer syndrome}, 606719 (3)	hsa05214	Glioma	0.0110751405690919	CDKN2A	0.0142151254776916
{Melanoma-pancreatic cancer syndrome}, 606719 (3)	hsa04115	p53 signaling pathway	0.01158630090305	CDKN2A	0.0142151254776916
{Melanoma-pancreatic cancer syndrome}, 606719 (3)	hsa05212	Pancreatic cancer	0.011927074459022	CDKN2A	0.0142151254776916
{Melanoma-pancreatic cancer syndrome}, 606719 (3)	hsa05218	Melanoma	0.0120974612370082	CDKN2A	0.0142151254776916
{Melanoma-pancreatic cancer syndrome}, 606719 (3)	hsa05220	Chronic myeloid leukemia	0.0124382347929801	CDKN2A	0.0142151254776916
{Melanoma-pancreatic cancer syndrome}, 606719 (3)	hsa04110	Cell cycle	0.0211279604702675	CDKN2A	0.0211279604702675
Hypochondroplasia	hsa05219	Bladder cancer	0.0071562446754132	FGFR3	0.0286249787016528
Hypochondroplasia	hsa04144	Endocytosis	0.0342477423751917	FGFR3	0.0456636565002557
Hypochondroplasia	hsa04810	Regulation of actin cytoskeleton	0.0362923837110242	FGFR3	0.0456636565002557
Hypochondroplasia	hsa04010	MAPK signaling pathway	0.0456636565002557	FGFR3	0.0456636565002557
Narcolepsy type 1	hsa05310	Asthma	0.000250215526772704	HLA-DRB1, HLA-DQB1	0.00181480614528943
Narcolepsy type 1	hsa05330	Allograft rejection	0.000382172985025498	HLA-DRB1, HLA-DQB1	0.00181480614528943
Narcolepsy type 1	hsa05332	Graft-versus-host disease	0.000469900033563915	HLA-DRB1, HLA-DQB1	0.00181480614528943
Narcolepsy type 1	hsa04940	Type I diabetes mellitus	0.00051710916163728	HLA-DRB1, HLA-DQB1	0.00181480614528943
Narcolepsy type 1	hsa04672	Intestinal immune network for IgA production	0.000644852675142165	HLA-DRB1, HLA-DQB1	0.00181480614528943
Narcolepsy type 1	hsa05320	Autoimmune thyroid disease	0.00075700760381875	HLA-DRB1, HLA-DQB1	0.00181480614528943
Narcolepsy type 1	hsa05150	Staphylococcus aureus infection	0.000846909534468401	HLA-DRB1, HLA-DQB1	0.00181480614528943
Narcolepsy type 1	hsa05416	Viral myocarditis	0.00137023560231133	HLA-DRB1, HLA-DQB1	0.00241540430057635
Narcolepsy type 1	hsa05140	Leishmaniasis	0.00144924258034581	HLA-DRB1, HLA-DQB1	0.00241540430057635
Narcolepsy type 1	hsa04612	Antigen processing and presentation	0.00161372375275213	HLA-DRB1, HLA-DQB1	0.0024205856291282
Narcolepsy type 1	hsa05323	Rheumatoid arthritis	0.00230675668598036	HLA-DRB1, HLA-DQB1	0.00314557729906413
Narcolepsy type 1	hsa05145	Toxoplasmosis	0.00480214835580172	HLA-DRB1, HLA-DQB1	0.00545540871478565
Narcolepsy type 1	hsa04514	Cell adhesion molecules (CAMs)	0.00487378311451206	HLA-DRB1, HLA-DQB1	0.00545540871478565
Narcolepsy type 1	hsa05322	Systemic lupus erythematosus	0.00509171480046661	HLA-DRB1, HLA-DQB1	0.00545540871478565
Narcolepsy type 1	hsa04145	Phagosome	0.00641177964673064	HLA-DRB1, HLA-DQB1	0.00641177964673064
Hemoglobin E-beta-thalassemia syndrome	hsa05143	African trypanosomiasis	0.00596353722951104	HBB	0.00868972567728732
Hemoglobin E-beta-thalassemia syndrome	hsa05144	Malaria	0.00868972567728732	HBB	0.00868972567728732
Hemoglobin C-beta-thalassemia syndrome	hsa05143	African trypanosomiasis	0.00596353722951104	HBB	0.00868972567728732
Hemoglobin C-beta-thalassemia syndrome	hsa05144	Malaria	0.00868972567728732	HBB	0.00868972567728732
Delta-beta-thalassemia	hsa05143	African trypanosomiasis	0.00596353722951104	HBB	0.00868972567728732
Delta-beta-thalassemia	hsa05144	Malaria	0.00868972567728732	HBB	0.00868972567728732
Dominant beta-thalassemia	hsa05143	African trypanosomiasis	0.00596353722951104	HBB	0.00868972567728732
Dominant beta-thalassemia	hsa05144	Malaria	0.00868972567728732	HBB	0.00868972567728732
Beta-thalassemia intermedia	hsa05143	African trypanosomiasis	0.00596353722951104	HBB	0.00868972567728732
Beta-thalassemia intermedia	hsa05144	Malaria	0.00868972567728732	HBB	0.00868972567728732
Beta-thalassemia major	hsa05143	African trypanosomiasis	0.00596353722951104	HBB	0.00868972567728732
Beta-thalassemia major	hsa05144	Malaria	0.00868972567728732	HBB	0.00868972567728732
Leber hereditary optic neuropathy	hsa05012	Parkinson's disease	0.0221502811381837	NDUFS2	0.0311807803714431
Leber hereditary optic neuropathy	hsa00190	Oxidative phosphorylation	0.0224910546941557	NDUFS2	0.0311807803714431
Leber hereditary optic neuropathy	hsa05010	Alzheimer's disease	0.0284545919236666	NDUFS2	0.0311807803714431
Leber hereditary optic neuropathy	hsa05016	Huntington's disease	0.0311807803714431	NDUFS2	0.0311807803714431
Familial cerebral saccular aneurysm	hsa04974	Protein digestion and absorption	0.0138013290168684	COL3A1	0.0240813312886921
Familial cerebral saccular aneurysm	hsa04512	ECM-receptor interaction	0.0144828761288124	COL3A1	0.0240813312886921
Familial cerebral saccular aneurysm	hsa05146	Amoebiasis	0.0180609984665191	COL3A1	0.0240813312886921
Familial cerebral saccular aneurysm	hsa04510	Focal adhesion	0.0340773555972058	COL3A1	0.0340773555972058
Hydrocephalus with stenosis of the aqueduct of Sylvius	hsa04360	Axon guidance	0.0219798943601976	L1CAM	0.0226614414721419
Hydrocephalus with stenosis of the aqueduct of Sylvius	hsa04514	Cell adhesion molecules (CAMs)	0.0226614414721419	L1CAM	0.0226614414721419
Essential thrombocythemia	hsa04722	Neurotrophin signaling pathway	0.00445156805475637	SH2B3, TP53	0.0263060713826547
Essential thrombocythemia	hsa04630	Jak-STAT signaling pathway	0.00657651784566367	JAK2, MPL	0.0263060713826547
Essential thrombocythemia	hsa05216	Thyroid cancer	0.0244713882500173	TP53	0.0460017328504948
Essential thrombocythemia	hsa05219	Bladder cancer	0.0352846107478649	TP53	0.0460017328504948
Essential thrombocythemia	hsa05213	Endometrial cancer	0.043537046797464	TP53	0.0460017328504948
Essential thrombocythemia	hsa05014	Amyotrophic lateral sclerosis (ALS)	0.0443591741424891	TP53	0.0460017328504948
Essential thrombocythemia	hsa05223	Non-small cell lung cancer	0.0451807360629308	TP53	0.0460017328504948
Essential thrombocythemia	hsa05217	Basal cell carcinoma	0.0460017328504948	TP53	0.0460017328504948
Ehlers-Danlos/osteogenesis imperfecta syndrome	hsa04974	Protein digestion and absorption	0.00018815717814408	COL1A1, COL1A2	0.000414642670354547
Ehlers-Danlos/osteogenesis imperfecta syndrome	hsa04512	ECM-receptor interaction	0.000207321335177273	COL1A1, COL1A2	0.000414642670354547
Ehlers-Danlos/osteogenesis imperfecta syndrome	hsa05146	Amoebiasis	0.000323177375423396	COL1A1, COL1A2	0.000430903167231195
Ehlers-Danlos/osteogenesis imperfecta syndrome	hsa04510	Focal adhesion	0.00115565674230469	COL1A1, COL1A2	0.00115565674230469
Cardiac-valvular Ehlers-Danlos syndrome	hsa04974	Protein digestion and absorption	0.0138013290168684	COL1A2	0.0240813312886921
Cardiac-valvular Ehlers-Danlos syndrome	hsa04512	ECM-receptor interaction	0.0144828761288124	COL1A2	0.0240813312886921
Cardiac-valvular Ehlers-Danlos syndrome	hsa05146	Amoebiasis	0.0180609984665191	COL1A2	0.0240813312886921
Cardiac-valvular Ehlers-Danlos syndrome	hsa04510	Focal adhesion	0.0340773555972058	COL1A2	0.0340773555972058
Maffucci syndrome	hsa00020	Citrate cycle (TCA cycle)	2.52618433619367e-05	IDH2, IDH1	0.000101047373447747
Maffucci syndrome	hsa00480	Glutathione metabolism	7.11396738353391e-05	IDH2, IDH1	0.000142279347670678
Maffucci syndrome	hsa04146	Peroxisome	0.000178923538846269	IDH2, IDH1	0.000238564718461692
Maffucci syndrome	hsa01100	Metabolic pathways	0.0370440251791471	IDH2, IDH1	0.0370440251791471
Classical-like Ehlers-Danlos syndrome type 1	hsa04512	ECM-receptor interaction	0.0144828761288124	TNXB	0.0289657522576248
Classical-like Ehlers-Danlos syndrome type 1	hsa04510	Focal adhesion	0.0340773555972058	TNXB	0.0340773555972058
Vascular Ehlers-Danlos syndrome	hsa04974	Protein digestion and absorption	0.0138013290168684	COL3A1	0.0240813312886921
Vascular Ehlers-Danlos syndrome	hsa04512	ECM-receptor interaction	0.0144828761288124	COL3A1	0.0240813312886921
Vascular Ehlers-Danlos syndrome	hsa05146	Amoebiasis	0.0180609984665191	COL3A1	0.0240813312886921
Vascular Ehlers-Danlos syndrome	hsa04510	Focal adhesion	0.0340773555972058	COL3A1	0.0340773555972058
Isolated growth hormone deficiency type II	hsa04630	Jak-STAT signaling pathway	0.0264099505878344	GH1	0.0463452036121997
Isolated growth hormone deficiency type II	hsa04060	Cytokine-cytokine receptor interaction	0.0451524961662976	GH1	0.0463452036121997
Isolated growth hormone deficiency type II	hsa04080	Neuroactive ligand-receptor interaction	0.0463452036121997	GH1	0.0463452036121997
Isolated growth hormone deficiency type IA	hsa04630	Jak-STAT signaling pathway	0.0264099505878344	GH1	0.0463452036121997
Isolated growth hormone deficiency type IA	hsa04060	Cytokine-cytokine receptor interaction	0.0451524961662976	GH1	0.0463452036121997
Isolated growth hormone deficiency type IA	hsa04080	Neuroactive ligand-receptor interaction	0.0463452036121997	GH1	0.0463452036121997
Arthrochalasia Ehlers-Danlos syndrome	hsa04974	Protein digestion and absorption	0.00018815717814408	COL1A2, COL1A1	0.000414642670354547
Arthrochalasia Ehlers-Danlos syndrome	hsa04512	ECM-receptor interaction	0.000207321335177273	COL1A2, COL1A1	0.000414642670354547
Arthrochalasia Ehlers-Danlos syndrome	hsa05146	Amoebiasis	0.000323177375423396	COL1A2, COL1A1	0.000430903167231195
Arthrochalasia Ehlers-Danlos syndrome	hsa04510	Focal adhesion	0.00115565674230469	COL1A2, COL1A1	0.00115565674230469
Miller-Dieker syndrome	hsa00565	Ether lipid metabolism	0.0122312618970216	PAFAH1B1	0.042813597910201
Miller-Dieker syndrome	hsa04114	Oocyte meiosis	0.0378056552382087	YWHAE	0.042813597910201
Miller-Dieker syndrome	hsa04110	Cell cycle	0.0418130546934588	YWHAE	0.042813597910201
Miller-Dieker syndrome	hsa04722	Neurotrophin signaling pathway	0.042813597910201	YWHAE	0.042813597910201
Familial congenital mirror movements	hsa04360	Axon guidance	0.0027943552547907	DCC, NTN1	0.0139717762739535
Familial congenital mirror movements	hsa05200	Pathways in cancer	0.0171274875471733	RAD51, DCC	0.0315866630271435
Familial congenital mirror movements	hsa03440	Homologous recombination	0.0189519978162861	RAD51	0.0315866630271435
Familial congenital mirror movements	hsa05210	Colorectal cancer	0.0416015033170906	DCC	0.0468733005382516
Familial congenital mirror movements	hsa05212	Pancreatic cancer	0.0468733005382516	RAD51	0.0468733005382516
Familial hypercholanemia	hsa04976	Bile secretion	0.000429541312509403	BAAT, EPHX1	0.00300678918756582
Familial hypercholanemia	hsa00430	Taurine and hypotaurine metabolism	0.00510376702053872	BAAT	0.0178631845718855
Familial hypercholanemia	hsa00120	Primary bile acid biosynthesis	0.00815767561931091	BAAT	0.0187211856812408
Familial hypercholanemia	hsa01040	Biosynthesis of unsaturated fatty acids	0.0106978203892805	BAAT	0.0187211856812408
Familial hypercholanemia	hsa05110	Vibrio cholerae infection	0.0273540863234356	TJP2	0.0382957208528099
Familial hypercholanemia	hsa00980	Metabolism of xenobiotics by cytochrome P450	0.0358611451900989	EPHX1	0.0398472440041747
Familial hypercholanemia	hsa04146	Peroxisome	0.0398472440041747	BAAT	0.0398472440041747
Chuvash erythrocytosis	hsa05211	Renal cell carcinoma	0.011927074459022	VHL	0.0230022150281138
Chuvash erythrocytosis	hsa04120	Ubiquitin mediated proteolysis	0.0230022150281138	VHL	0.0230022150281138
Immune dysregulation-inflammatory bowel disease-arthritis-recurrent infections syndrome	hsa05145	Toxoplasmosis	1.1125467675994e-05	IL10, IL10RA, IL10RB	9.94114106336228e-05
Immune dysregulation-inflammatory bowel disease-arthritis-recurrent infections syndrome	hsa04630	Jak-STAT signaling pathway	1.8074801933386e-05	IL10, IL10RA, IL10RB	9.94114106336228e-05
Immune dysregulation-inflammatory bowel disease-arthritis-recurrent infections syndrome	hsa04060	Cytokine-cytokine receptor interaction	9.10615936204815e-05	IL10, IL10RA, IL10RB	0.000333892509941765
Immune dysregulation-inflammatory bowel disease-arthritis-recurrent infections syndrome	hsa05310	Asthma	0.0152591450496953	IL10	0.0306414694209784
Immune dysregulation-inflammatory bowel disease-arthritis-recurrent infections syndrome	hsa05143	African trypanosomiasis	0.0177871453736534	IL10	0.0306414694209784
Immune dysregulation-inflammatory bowel disease-arthritis-recurrent infections syndrome	hsa05330	Allograft rejection	0.0187971328254781	IL10	0.0306414694209784
Immune dysregulation-inflammatory bowel disease-arthritis-recurrent infections syndrome	hsa04672	Intestinal immune network for IgA production	0.0243396899124961	IL10	0.0306414694209784
Immune dysregulation-inflammatory bowel disease-arthritis-recurrent infections syndrome	hsa05144	Malaria	0.0258476654248697	IL10	0.0306414694209784
Immune dysregulation-inflammatory bowel disease-arthritis-recurrent infections syndrome	hsa05320	Autoimmune thyroid disease	0.0263499784196662	IL10	0.0306414694209784
Immune dysregulation-inflammatory bowel disease-arthritis-recurrent infections syndrome	hsa05150	Staphylococcus aureus infection	0.0278558812917985	IL10	0.0306414694209784
Immune dysregulation-inflammatory bowel disease-arthritis-recurrent infections syndrome	hsa05140	Leishmaniasis	0.0363600097234603	IL10	0.0363600097234603
Rolandic epilepsy-speech dyspraxia syndrome	hsa05014	Amyotrophic lateral sclerosis (ALS)	0.00903049923325949	GRIN2A	0.0357812233770659
Rolandic epilepsy-speech dyspraxia syndrome	hsa04720	Long-term potentiation	0.011927074459022	GRIN2A	0.0357812233770659
Rolandic epilepsy-speech dyspraxia syndrome	hsa05322	Systemic lupus erythematosus	0.0231726018060997	GRIN2A	0.0361901516442323
Rolandic epilepsy-speech dyspraxia syndrome	hsa05010	Alzheimer's disease	0.0284545919236666	GRIN2A	0.0361901516442323
Rolandic epilepsy-speech dyspraxia syndrome	hsa04020	Calcium signaling pathway	0.0301584597035269	GRIN2A	0.0361901516442323
Rolandic epilepsy-speech dyspraxia syndrome	hsa04080	Neuroactive ligand-receptor interaction	0.0463452036121997	GRIN2A	0.0463452036121997
Classic progressive supranuclear palsy syndrome	hsa05010	Alzheimer's disease	0.0284545919236666	MAPT	0.0456636565002557
Classic progressive supranuclear palsy syndrome	hsa04010	MAPK signaling pathway	0.0456636565002557	MAPT	0.0456636565002557
Progressive supranuclear palsy-progressive non-fluent aphasia syndrome	hsa05010	Alzheimer's disease	0.0284545919236666	MAPT	0.0456636565002557
Progressive supranuclear palsy-progressive non-fluent aphasia syndrome	hsa04010	MAPK signaling pathway	0.0456636565002557	MAPT	0.0456636565002557
Progressive supranuclear palsy-corticobasal syndrome	hsa05010	Alzheimer's disease	0.0284545919236666	MAPT	0.0456636565002557
Progressive supranuclear palsy-corticobasal syndrome	hsa04010	MAPK signaling pathway	0.0456636565002557	MAPT	0.0456636565002557
Progressive supranuclear palsy-pure akinesia with gait freezing syndrome	hsa05010	Alzheimer's disease	0.0284545919236666	MAPT	0.0456636565002557
Progressive supranuclear palsy-pure akinesia with gait freezing syndrome	hsa04010	MAPK signaling pathway	0.0456636565002557	MAPT	0.0456636565002557
Progressive supranuclear palsy-parkinsonism syndrome	hsa05010	Alzheimer's disease	0.0284545919236666	MAPT	0.0456636565002557
Progressive supranuclear palsy-parkinsonism syndrome	hsa04010	MAPK signaling pathway	0.0456636565002557	MAPT	0.0456636565002557
Nijmegen breakage syndrome-like disorder	hsa03450	Non-homologous end-joining	4.52970984420934e-06	MRE11, RAD50	9.05941968841869e-06
Nijmegen breakage syndrome-like disorder	hsa03440	Homologous recombination	2.19516707834761e-05	MRE11, RAD50	2.19516707834761e-05
Susceptibility to infection due to TYK2 deficiency	hsa04380	Osteoclast differentiation	0.0218095075822118	TYK2	0.0264099505878344
Susceptibility to infection due to TYK2 deficiency	hsa05145	Toxoplasmosis	0.0224910546941557	TYK2	0.0264099505878344
Susceptibility to infection due to TYK2 deficiency	hsa05160	Hepatitis C	0.0228318282501278	TYK2	0.0264099505878344
Susceptibility to infection due to TYK2 deficiency	hsa04630	Jak-STAT signaling pathway	0.0264099505878344	TYK2	0.0264099505878344
Immunodeficiency due to MASP-2 deficiency	hsa05150	Staphylococcus aureus infection	0.00937127278923144	MASP2	0.0117566876810358
Immunodeficiency due to MASP-2 deficiency	hsa04610	Complement and coagulation cascades	0.0117566876810358	MASP2	0.0117566876810358
Leukoencephalopathy-dystonia-motor neuropathy syndrome	hsa00120	Primary bile acid biosynthesis	0.0027261884477765	SCP2	0.0081785653433295
Leukoencephalopathy-dystonia-motor neuropathy syndrome	hsa03320	PPAR signaling pathway	0.011927074459022	SCP2	0.0134605554608964
Leukoencephalopathy-dystonia-motor neuropathy syndrome	hsa04146	Peroxisome	0.0134605554608964	SCP2	0.0134605554608964
Hemoglobin Lepore-beta-thalassemia syndrome	hsa05143	African trypanosomiasis	0.00596353722951104	HBB	0.00868972567728732
Hemoglobin Lepore-beta-thalassemia syndrome	hsa05144	Malaria	0.00868972567728732	HBB	0.00868972567728732
Hemoglobin M disease	hsa05143	African trypanosomiasis	1.94352708961139e-07	HBA2, HBB, HBA1	3.88705417922278e-07
Hemoglobin M disease	hsa05144	Malaria	6.18394983058171e-07	HBA2, HBB, HBA1	6.18394983058171e-07
DNM1L-related encephalopathy due to mitochondrial and peroxisomal fission defect	hsa05100	Bacterial invasion of epithelial cells	0.011927074459022	DNM1L	0.0240245356960299
DNM1L-related encephalopathy due to mitochondrial and peroxisomal fission defect	hsa04666	Fc gamma R-mediated phagocytosis	0.0160163571306866	DNM1L	0.0240245356960299
DNM1L-related encephalopathy due to mitochondrial and peroxisomal fission defect	hsa04144	Endocytosis	0.0342477423751917	DNM1L	0.0342477423751917
Generalized juvenile polyposis/juvenile polyposis coli	hsa04350	TGF-beta signaling pathway	0.000202443186114279	BMPR1A, SMAD4	0.00121465911668567
Generalized juvenile polyposis/juvenile polyposis coli	hsa05210	Colorectal cancer	0.0210181440431467	SMAD4	0.0296686238497586
Generalized juvenile polyposis/juvenile polyposis coli	hsa05212	Pancreatic cancer	0.0237139021324828	SMAD4	0.0296686238497586
Generalized juvenile polyposis/juvenile polyposis coli	hsa05220	Chronic myeloid leukemia	0.0247238532081322	SMAD4	0.0296686238497586
Generalized juvenile polyposis/juvenile polyposis coli	hsa04520	Adherens junction	0.0247238532081322	SMAD4	0.0296686238497586
Generalized juvenile polyposis/juvenile polyposis coli	hsa04110	Cell cycle	0.0418130546934588	SMAD4	0.0418130546934588
Intermittent hydrarthrosis	hsa05014	Amyotrophic lateral sclerosis (ALS)	0.0179809735926045	TNFRSF1A	0.0451461661871562
Intermittent hydrarthrosis	hsa04621	NOD-like receptor signaling pathway	0.0196688712416039	MEFV	0.0451461661871562
Intermittent hydrarthrosis	hsa04920	Adipocytokine signaling pathway	0.0230403110493677	TNFRSF1A	0.0451461661871562
Intermittent hydrarthrosis	hsa04210	Apoptosis	0.029430047516656	TNFRSF1A	0.0451461661871562
Intermittent hydrarthrosis	hsa05142	Chagas disease (American trypanosomiasis)	0.035129409745125	TNFRSF1A	0.0451461661871562
Intermittent hydrarthrosis	hsa04380	Osteoclast differentiation	0.0431469961693753	TNFRSF1A	0.0451461661871562
Intermittent hydrarthrosis	hsa05145	Toxoplasmosis	0.0444800084740419	TNFRSF1A	0.0451461661871562
Intermittent hydrarthrosis	hsa05160	Hepatitis C	0.0451461661871562	TNFRSF1A	0.0451461661871562
Immunoglobulin-mediated membranoproliferative glomerulonephritis	hsa00561	Glycerolipid metabolism	0.0169675381247676	DGKE	0.0270783731558707
Immunoglobulin-mediated membranoproliferative glomerulonephritis	hsa05150	Staphylococcus aureus infection	0.0186563068718139	CFH	0.0270783731558707
Immunoglobulin-mediated membranoproliferative glomerulonephritis	hsa04610	Complement and coagulation cascades	0.0233771356275266	CFH	0.0270783731558707
Immunoglobulin-mediated membranoproliferative glomerulonephritis	hsa04070	Phosphatidylinositol signaling system	0.0264059435368182	DGKE	0.0270783731558707
Immunoglobulin-mediated membranoproliferative glomerulonephritis	hsa00564	Glycerophospholipid metabolism	0.0270783731558707	DGKE	0.0270783731558707
Autosomal dominant focal dystonia, DYT25 type	hsa05142	Chagas disease (American trypanosomiasis)	0.0177202249105469	GNAL	0.0270914976997786
Autosomal dominant focal dystonia, DYT25 type	hsa05146	Amoebiasis	0.0180609984665191	GNAL	0.0270914976997786
Autosomal dominant focal dystonia, DYT25 type	hsa04020	Calcium signaling pathway	0.0301584597035269	GNAL	0.0301584597035269
Chronic granulomatous disease	hsa04670	Leukocyte transendothelial migration	2.76870553598911e-09	CYBB, NCF1, NCF2, CYBA, NCF4	9.13409557510039e-09
Chronic granulomatous disease	hsa04380	Osteoclast differentiation	4.5670477875502e-09	CYBB, NCF1, NCF2, CYBA, NCF4	9.13409557510039e-09
Chronic granulomatous disease	hsa04145	Phagosome	1.1290394462648e-08	CYBB, NCF1, NCF2, CYBA, NCF4	1.50538592835306e-08
Chronic granulomatous disease	hsa05140	Leishmaniasis	1.0319260643922e-07	NCF1, NCF2, CYBA, NCF4	1.0319260643922e-07
Adult-onset chronic progressive external ophthalmoplegia with mitochondrial myopathy	hsa03030	DNA replication	0.0122312618970216	RNASEH1	0.0307204147324902
Adult-onset chronic progressive external ophthalmoplegia with mitochondrial myopathy	hsa00480	Glutathione metabolism	0.0169675381247676	RRM2B	0.0307204147324902
Adult-onset chronic progressive external ophthalmoplegia with mitochondrial myopathy	hsa04115	p53 signaling pathway	0.0230403110493677	RRM2B	0.0307204147324902
Adult-onset chronic progressive external ophthalmoplegia with mitochondrial myopathy	hsa00240	Pyrimidine metabolism	0.0334548689328458	RRM2B	0.0334548689328458
Tall stature-scoliosis-macrodactyly of the great toes syndrome	hsa04270	Vascular smooth muscle contraction	0.0197648662463792	NPR2	0.0276026580337366
Tall stature-scoliosis-macrodactyly of the great toes syndrome	hsa00230	Purine metabolism	0.0276026580337366	NPR2	0.0276026580337366
Congenital muscular dystrophy with intellectual disability and severe epilepsy	hsa00563	Glycosylphosphatidylinositol(GPI)-anchor biosynthesis	0.00425966944965073	DPM2	0.00834895212131526
Congenital muscular dystrophy with intellectual disability and severe epilepsy	hsa00510	N-Glycan biosynthesis	0.00834895212131526	DPM2	0.00834895212131526
Congenital chronic diarrhea with protein-losing enteropathy	hsa04975	Fat digestion and absorption	0.00783779178735711	DGAT1	0.0109047537911058
Congenital chronic diarrhea with protein-losing enteropathy	hsa00561	Glycerolipid metabolism	0.00851933889930134	DGAT1	0.0109047537911058
Congenital chronic diarrhea with protein-losing enteropathy	hsa00830	Retinol metabolism	0.0109047537911058	DGAT1	0.0109047537911058
Leydig cell hypoplasia due to LHB deficiency	hsa04912	GnRH signaling pathway	0.0172090645765888	LHB	0.0344181291531775
Leydig cell hypoplasia due to LHB deficiency	hsa04080	Neuroactive ligand-receptor interaction	0.0463452036121997	LHB	0.0463452036121997
Classic multiminicore myopathy	hsa05410	Hypertrophic cardiomyopathy (HCM)	0.000197623110254415	TTN, MYH7	0.000581457946348026
Classic multiminicore myopathy	hsa05414	Dilated cardiomyopathy	0.00023258317853921	TTN, MYH7	0.000581457946348026
Classic multiminicore myopathy	hsa05416	Viral myocarditis	0.0237139021324828	MYH7	0.0325870520218588
Classic multiminicore myopathy	hsa04260	Cardiac muscle contraction	0.026069641617487	MYH7	0.0325870520218588
Classic multiminicore myopathy	hsa04530	Tight junction	0.0444800084740419	MYH7	0.0444800084740419
Familial dyskinesia and facial myokymia	hsa04976	Bile secretion	0.0120974612370082	ADCY5	0.0233584782911754
Familial dyskinesia and facial myokymia	hsa04971	Gastric acid secretion	0.012608621570966	ADCY5	0.0233584782911754
Familial dyskinesia and facial myokymia	hsa04914	Progesterone-mediated oocyte maturation	0.0146532629067984	ADCY5	0.0233584782911754
Familial dyskinesia and facial myokymia	hsa04970	Salivary secretion	0.0151644232407567	ADCY5	0.0233584782911754
Familial dyskinesia and facial myokymia	hsa05414	Dilated cardiomyopathy	0.0153348100187426	ADCY5	0.0233584782911754
Familial dyskinesia and facial myokymia	hsa04540	Gap junction	0.0153348100187426	ADCY5	0.0233584782911754
Familial dyskinesia and facial myokymia	hsa04912	GnRH signaling pathway	0.0172090645765888	ADCY5	0.0233584782911754
Familial dyskinesia and facial myokymia	hsa04916	Melanogenesis	0.0172090645765888	ADCY5	0.0233584782911754
Familial dyskinesia and facial myokymia	hsa04972	Pancreatic secretion	0.0172090645765888	ADCY5	0.0233584782911754
Familial dyskinesia and facial myokymia	hsa04114	Oocyte meiosis	0.0190833191344352	ADCY5	0.0233584782911754
Familial dyskinesia and facial myokymia	hsa04270	Vascular smooth muscle contraction	0.0197648662463792	ADCY5	0.0233584782911754
Familial dyskinesia and facial myokymia	hsa00230	Purine metabolism	0.0276026580337366	ADCY5	0.029902879536548
Familial dyskinesia and facial myokymia	hsa04062	Chemokine signaling pathway	0.0322031010393593	ADCY5	0.0322031010393593
Benign Samaritan congenital myopathy	hsa04730	Long-term depression	0.011927074459022	RYR1	0.0238541489180439
Benign Samaritan congenital myopathy	hsa04020	Calcium signaling pathway	0.0301584597035269	RYR1	0.0301584597035269
Hypopigmentation-punctate palmoplantar keratoderma syndrome	hsa00740	Riboflavin metabolism	0.0018742545578464	ENPP1	0.00681547111944107
Hypopigmentation-punctate palmoplantar keratoderma syndrome	hsa00770	Pantothenate and CoA biosynthesis	0.0027261884477765	ENPP1	0.00681547111944107
Hypopigmentation-punctate palmoplantar keratoderma syndrome	hsa00760	Nicotinate and nicotinamide metabolism	0.00408928267166464	ENPP1	0.00681547111944107
Hypopigmentation-punctate palmoplantar keratoderma syndrome	hsa00500	Starch and sucrose metabolism	0.00920088601124547	ENPP1	0.0115011075140568
Hypopigmentation-punctate palmoplantar keratoderma syndrome	hsa00230	Purine metabolism	0.0276026580337366	ENPP1	0.0276026580337366
Autoinflammation-PLCG2-associated antibody deficiency-immune dysregulation	hsa05110	Vibrio cholerae infection	0.00920088601124547	PLCG2	0.0232965194628169
Autoinflammation-PLCG2-associated antibody deficiency-immune dysregulation	hsa05223	Non-small cell lung cancer	0.00920088601124547	PLCG2	0.0232965194628169
Autoinflammation-PLCG2-associated antibody deficiency-immune dysregulation	hsa00562	Inositol phosphate metabolism	0.00971204634520362	PLCG2	0.0232965194628169
Autoinflammation-PLCG2-associated antibody deficiency-immune dysregulation	hsa05214	Glioma	0.0110751405690919	PLCG2	0.0232965194628169
Autoinflammation-PLCG2-associated antibody deficiency-immune dysregulation	hsa05120	Epithelial cell signaling in Helicobacter pylori infection	0.01158630090305	PLCG2	0.0232965194628169
Autoinflammation-PLCG2-associated antibody deficiency-immune dysregulation	hsa04662	B cell receptor signaling pathway	0.0127790083489521	PLCG2	0.0232965194628169
Autoinflammation-PLCG2-associated antibody deficiency-immune dysregulation	hsa04370	VEGF signaling pathway	0.012949395126938	PLCG2	0.0232965194628169
Autoinflammation-PLCG2-associated antibody deficiency-immune dysregulation	hsa04070	Phosphatidylinositol signaling system	0.0132901686829102	PLCG2	0.0232965194628169
Autoinflammation-PLCG2-associated antibody deficiency-immune dysregulation	hsa04664	Fc epsilon RI signaling pathway	0.0134605554608964	PLCG2	0.0232965194628169
Autoinflammation-PLCG2-associated antibody deficiency-immune dysregulation	hsa04012	ErbB signaling pathway	0.0148236496847843	PLCG2	0.0232965194628169
Autoinflammation-PLCG2-associated antibody deficiency-immune dysregulation	hsa04666	Fc gamma R-mediated phagocytosis	0.0160163571306866	PLCG2	0.0232965194628169
Autoinflammation-PLCG2-associated antibody deficiency-immune dysregulation	hsa04670	Leukocyte transendothelial migration	0.0197648662463792	PLCG2	0.0247174419265063
Autoinflammation-PLCG2-associated antibody deficiency-immune dysregulation	hsa04722	Neurotrophin signaling pathway	0.0216391208042256	PLCG2	0.0247174419265063
Autoinflammation-PLCG2-associated antibody deficiency-immune dysregulation	hsa04380	Osteoclast differentiation	0.0218095075822118	PLCG2	0.0247174419265063
Autoinflammation-PLCG2-associated antibody deficiency-immune dysregulation	hsa04650	Natural killer cell mediated cytotoxicity	0.0231726018060997	PLCG2	0.0247174419265063
Autoinflammation-PLCG2-associated antibody deficiency-immune dysregulation	hsa04020	Calcium signaling pathway	0.0301584597035269	PLCG2	0.0301584597035269
Sinoatrial node dysfunction and deafness	hsa04973	Carbohydrate digestion and absorption	0.00749701823138538	CACNA1D	0.0270428157632109
Sinoatrial node dysfunction and deafness	hsa04930	Type II diabetes mellitus	0.00817856534332939	CACNA1D	0.0270428157632109
Sinoatrial node dysfunction and deafness	hsa05412	Arrhythmogenic right ventricular cardiomyopathy (ARVC)	0.012608621570966	CACNA1D	0.0270428157632109
Sinoatrial node dysfunction and deafness	hsa04260	Cardiac muscle contraction	0.0131197819049241	CACNA1D	0.0270428157632109
Sinoatrial node dysfunction and deafness	hsa05410	Hypertrophic cardiomyopathy (HCM)	0.0141421025728402	CACNA1D	0.0270428157632109
Sinoatrial node dysfunction and deafness	hsa05414	Dilated cardiomyopathy	0.0153348100187426	CACNA1D	0.0270428157632109
Sinoatrial node dysfunction and deafness	hsa04912	GnRH signaling pathway	0.0172090645765888	CACNA1D	0.0270428157632109
Sinoatrial node dysfunction and deafness	hsa04270	Vascular smooth muscle contraction	0.0197648662463792	CACNA1D	0.0271766910887714
Sinoatrial node dysfunction and deafness	hsa05010	Alzheimer's disease	0.0284545919236666	CACNA1D	0.0331743056738796
Sinoatrial node dysfunction and deafness	hsa04020	Calcium signaling pathway	0.0301584597035269	CACNA1D	0.0331743056738796
Sinoatrial node dysfunction and deafness	hsa04010	MAPK signaling pathway	0.0456636565002557	CACNA1D	0.0456636565002557
Autosomal recessive congenital cerebellar ataxia due to MGLUR1 deficiency	hsa04720	Long-term potentiation	0.011927074459022	GRM1	0.0306696200374852
Autosomal recessive congenital cerebellar ataxia due to MGLUR1 deficiency	hsa04730	Long-term depression	0.011927074459022	GRM1	0.0306696200374852
Autosomal recessive congenital cerebellar ataxia due to MGLUR1 deficiency	hsa04540	Gap junction	0.0153348100187426	GRM1	0.0306696200374852
Autosomal recessive congenital cerebellar ataxia due to MGLUR1 deficiency	hsa04020	Calcium signaling pathway	0.0301584597035269	GRM1	0.0374169364457317
Autosomal recessive congenital cerebellar ataxia due to MGLUR1 deficiency	hsa05016	Huntington's disease	0.0311807803714431	GRM1	0.0374169364457317
Autosomal recessive congenital cerebellar ataxia due to MGLUR1 deficiency	hsa04080	Neuroactive ligand-receptor interaction	0.0463452036121997	GRM1	0.0463452036121997
Autosomal recessive spastic paraplegia type 45	hsa00760	Nicotinate and nicotinamide metabolism	0.00408928267166464	NT5C2	0.0122678480149939
Autosomal recessive spastic paraplegia type 45	hsa00240	Pyrimidine metabolism	0.0168682910206168	NT5C2	0.0253024365309252
Autosomal recessive spastic paraplegia type 45	hsa00230	Purine metabolism	0.0276026580337366	NT5C2	0.0276026580337366
Mendelian susceptibility to mycobacterial diseases due to complete IFNgammaR2 deficiency	hsa05140	Leishmaniasis	0.012267848014994	IFNGR2	0.0308116090191401
Mendelian susceptibility to mycobacterial diseases due to complete IFNgammaR2 deficiency	hsa05142	Chagas disease (American trypanosomiasis)	0.0177202249105469	IFNGR2	0.0308116090191401
Mendelian susceptibility to mycobacterial diseases due to complete IFNgammaR2 deficiency	hsa04380	Osteoclast differentiation	0.0218095075822118	IFNGR2	0.0308116090191401
Mendelian susceptibility to mycobacterial diseases due to complete IFNgammaR2 deficiency	hsa05145	Toxoplasmosis	0.0224910546941557	IFNGR2	0.0308116090191401
Mendelian susceptibility to mycobacterial diseases due to complete IFNgammaR2 deficiency	hsa04650	Natural killer cell mediated cytotoxicity	0.0231726018060997	IFNGR2	0.0308116090191401
Mendelian susceptibility to mycobacterial diseases due to complete IFNgammaR2 deficiency	hsa04630	Jak-STAT signaling pathway	0.0264099505878344	IFNGR2	0.0308116090191401
Mendelian susceptibility to mycobacterial diseases due to complete IFNgammaR2 deficiency	hsa04060	Cytokine-cytokine receptor interaction	0.0451524961662976	IFNGR2	0.0451524961662976
Combined oxidative phosphorylation defect type 15	hsa00670	One carbon pool by folate	0.00306696200374856	MTFMT	0.00613392400749713
Combined oxidative phosphorylation defect type 15	hsa00970	Aminoacyl-tRNA biosynthesis	0.0107343670131198	MTFMT	0.0107343670131198
Combined oxidative phosphorylation defect type 13	hsa03018	RNA degradation	0.0120974612370082	PNPT1	0.0253024365309252
Combined oxidative phosphorylation defect type 13	hsa00240	Pyrimidine metabolism	0.0168682910206168	PNPT1	0.0253024365309252
Combined oxidative phosphorylation defect type 13	hsa00230	Purine metabolism	0.0276026580337366	PNPT1	0.0276026580337366
Autosomal dominant mendelian susceptibility to mycobacterial diseases due to partial IFNgammaR2 deficiency	hsa05140	Leishmaniasis	0.012267848014994	IFNGR2	0.0308116090191401
Autosomal dominant mendelian susceptibility to mycobacterial diseases due to partial IFNgammaR2 deficiency	hsa05142	Chagas disease (American trypanosomiasis)	0.0177202249105469	IFNGR2	0.0308116090191401
Autosomal dominant mendelian susceptibility to mycobacterial diseases due to partial IFNgammaR2 deficiency	hsa04380	Osteoclast differentiation	0.0218095075822118	IFNGR2	0.0308116090191401
Autosomal dominant mendelian susceptibility to mycobacterial diseases due to partial IFNgammaR2 deficiency	hsa05145	Toxoplasmosis	0.0224910546941557	IFNGR2	0.0308116090191401
Autosomal dominant mendelian susceptibility to mycobacterial diseases due to partial IFNgammaR2 deficiency	hsa04650	Natural killer cell mediated cytotoxicity	0.0231726018060997	IFNGR2	0.0308116090191401
Autosomal dominant mendelian susceptibility to mycobacterial diseases due to partial IFNgammaR2 deficiency	hsa04630	Jak-STAT signaling pathway	0.0264099505878344	IFNGR2	0.0308116090191401
Autosomal dominant mendelian susceptibility to mycobacterial diseases due to partial IFNgammaR2 deficiency	hsa04060	Cytokine-cytokine receptor interaction	0.0451524961662976	IFNGR2	0.0451524961662976
Mendelian susceptibility to mycobacterial diseases due to partial STAT1 deficiency	hsa05212	Pancreatic cancer	0.011927074459022	STAT1	0.0301828006718107
Mendelian susceptibility to mycobacterial diseases due to partial STAT1 deficiency	hsa05140	Leishmaniasis	0.012267848014994	STAT1	0.0301828006718107
Mendelian susceptibility to mycobacterial diseases due to partial STAT1 deficiency	hsa04620	Toll-like receptor signaling pathway	0.0173794513545749	STAT1	0.0301828006718107
Mendelian susceptibility to mycobacterial diseases due to partial STAT1 deficiency	hsa04380	Osteoclast differentiation	0.0218095075822118	STAT1	0.0301828006718107
Mendelian susceptibility to mycobacterial diseases due to partial STAT1 deficiency	hsa05145	Toxoplasmosis	0.0224910546941557	STAT1	0.0301828006718107
Mendelian susceptibility to mycobacterial diseases due to partial STAT1 deficiency	hsa05160	Hepatitis C	0.0228318282501278	STAT1	0.0301828006718107
Mendelian susceptibility to mycobacterial diseases due to partial STAT1 deficiency	hsa04630	Jak-STAT signaling pathway	0.0264099505878344	STAT1	0.0301828006718107
Mendelian susceptibility to mycobacterial diseases due to partial STAT1 deficiency	hsa04062	Chemokine signaling pathway	0.0322031010393593	STAT1	0.0322031010393593
Autosomal recessive mendelian susceptibility to mycobacterial diseases due to partial IFNgammaR2 deficiency	hsa05140	Leishmaniasis	0.012267848014994	IFNGR2	0.0308116090191401
Autosomal recessive mendelian susceptibility to mycobacterial diseases due to partial IFNgammaR2 deficiency	hsa05142	Chagas disease (American trypanosomiasis)	0.0177202249105469	IFNGR2	0.0308116090191401
Autosomal recessive mendelian susceptibility to mycobacterial diseases due to partial IFNgammaR2 deficiency	hsa04380	Osteoclast differentiation	0.0218095075822118	IFNGR2	0.0308116090191401
Autosomal recessive mendelian susceptibility to mycobacterial diseases due to partial IFNgammaR2 deficiency	hsa05145	Toxoplasmosis	0.0224910546941557	IFNGR2	0.0308116090191401
Autosomal recessive mendelian susceptibility to mycobacterial diseases due to partial IFNgammaR2 deficiency	hsa04650	Natural killer cell mediated cytotoxicity	0.0231726018060997	IFNGR2	0.0308116090191401
Autosomal recessive mendelian susceptibility to mycobacterial diseases due to partial IFNgammaR2 deficiency	hsa04630	Jak-STAT signaling pathway	0.0264099505878344	IFNGR2	0.0308116090191401
Autosomal recessive mendelian susceptibility to mycobacterial diseases due to partial IFNgammaR2 deficiency	hsa04060	Cytokine-cytokine receptor interaction	0.0451524961662976	IFNGR2	0.0451524961662976
Autosomal dominant mendelian susceptibility to mycobacterial diseases due to partial IFNgammaR1 deficiency	hsa05140	Leishmaniasis	0.012267848014994	IFNGR1	0.0308116090191401
Autosomal dominant mendelian susceptibility to mycobacterial diseases due to partial IFNgammaR1 deficiency	hsa05142	Chagas disease (American trypanosomiasis)	0.0177202249105469	IFNGR1	0.0308116090191401
Autosomal dominant mendelian susceptibility to mycobacterial diseases due to partial IFNgammaR1 deficiency	hsa04380	Osteoclast differentiation	0.0218095075822118	IFNGR1	0.0308116090191401
Autosomal dominant mendelian susceptibility to mycobacterial diseases due to partial IFNgammaR1 deficiency	hsa05145	Toxoplasmosis	0.0224910546941557	IFNGR1	0.0308116090191401
Autosomal dominant mendelian susceptibility to mycobacterial diseases due to partial IFNgammaR1 deficiency	hsa04650	Natural killer cell mediated cytotoxicity	0.0231726018060997	IFNGR1	0.0308116090191401
Autosomal dominant mendelian susceptibility to mycobacterial diseases due to partial IFNgammaR1 deficiency	hsa04630	Jak-STAT signaling pathway	0.0264099505878344	IFNGR1	0.0308116090191401
Autosomal dominant mendelian susceptibility to mycobacterial diseases due to partial IFNgammaR1 deficiency	hsa04060	Cytokine-cytokine receptor interaction	0.0451524961662976	IFNGR1	0.0451524961662976
Autosomal recessive mendelian susceptibility to mycobacterial diseases due to partial IFNgammaR1 deficiency	hsa05140	Leishmaniasis	0.012267848014994	IFNGR1	0.0308116090191401
Autosomal recessive mendelian susceptibility to mycobacterial diseases due to partial IFNgammaR1 deficiency	hsa05142	Chagas disease (American trypanosomiasis)	0.0177202249105469	IFNGR1	0.0308116090191401
Autosomal recessive mendelian susceptibility to mycobacterial diseases due to partial IFNgammaR1 deficiency	hsa04380	Osteoclast differentiation	0.0218095075822118	IFNGR1	0.0308116090191401
Autosomal recessive mendelian susceptibility to mycobacterial diseases due to partial IFNgammaR1 deficiency	hsa05145	Toxoplasmosis	0.0224910546941557	IFNGR1	0.0308116090191401
Autosomal recessive mendelian susceptibility to mycobacterial diseases due to partial IFNgammaR1 deficiency	hsa04650	Natural killer cell mediated cytotoxicity	0.0231726018060997	IFNGR1	0.0308116090191401
Autosomal recessive mendelian susceptibility to mycobacterial diseases due to partial IFNgammaR1 deficiency	hsa04630	Jak-STAT signaling pathway	0.0264099505878344	IFNGR1	0.0308116090191401
Autosomal recessive mendelian susceptibility to mycobacterial diseases due to partial IFNgammaR1 deficiency	hsa04060	Cytokine-cytokine receptor interaction	0.0451524961662976	IFNGR1	0.0451524961662976
Mendelian susceptibility to mycobacterial diseases due to complete IL12RB1 deficiency	hsa04630	Jak-STAT signaling pathway	0.0264099505878344	IL12RB1	0.0451524961662976
Mendelian susceptibility to mycobacterial diseases due to complete IL12RB1 deficiency	hsa04060	Cytokine-cytokine receptor interaction	0.0451524961662976	IL12RB1	0.0451524961662976
Mendelian susceptibility to mycobacterial diseases due to complete IL12B deficiency	hsa05143	African trypanosomiasis	0.00596353722951104	IL12B	0.0248338728914638
Mendelian susceptibility to mycobacterial diseases due to complete IL12B deficiency	hsa05330	Allograft rejection	0.00630431078548299	IL12B	0.0248338728914638
Mendelian susceptibility to mycobacterial diseases due to complete IL12B deficiency	hsa04940	Type I diabetes mellitus	0.00732663145339929	IL12B	0.0248338728914638
Mendelian susceptibility to mycobacterial diseases due to complete IL12B deficiency	hsa04622	RIG-I-like receptor signaling pathway	0.0120974612370082	IL12B	0.0248338728914638
Mendelian susceptibility to mycobacterial diseases due to complete IL12B deficiency	hsa05140	Leishmaniasis	0.012267848014994	IL12B	0.0248338728914638
Mendelian susceptibility to mycobacterial diseases due to complete IL12B deficiency	hsa04620	Toll-like receptor signaling pathway	0.0173794513545749	IL12B	0.0248338728914638
Mendelian susceptibility to mycobacterial diseases due to complete IL12B deficiency	hsa05142	Chagas disease (American trypanosomiasis)	0.0177202249105469	IL12B	0.0248338728914638
Mendelian susceptibility to mycobacterial diseases due to complete IL12B deficiency	hsa05146	Amoebiasis	0.0180609984665191	IL12B	0.0248338728914638
Mendelian susceptibility to mycobacterial diseases due to complete IL12B deficiency	hsa05145	Toxoplasmosis	0.0224910546941557	IL12B	0.0274890668484125
Mendelian susceptibility to mycobacterial diseases due to complete IL12B deficiency	hsa04630	Jak-STAT signaling pathway	0.0264099505878344	IL12B	0.0290509456466178
Mendelian susceptibility to mycobacterial diseases due to complete IL12B deficiency	hsa04060	Cytokine-cytokine receptor interaction	0.0451524961662976	IL12B	0.0451524961662976
Constitutional megaloblastic anemia with severe neurologic disease	hsa00790	Folate biosynthesis	0.0018742545578464	DHFR	0.00306696200374856
Constitutional megaloblastic anemia with severe neurologic disease	hsa00670	One carbon pool by folate	0.00306696200374856	DHFR	0.00306696200374856
PGM1-CDG	hsa00030	Pentose phosphate pathway	0.00460044300562257	PGM1	0.0132901686829102
PGM1-CDG	hsa00052	Galactose metabolism	0.00460044300562257	PGM1	0.0132901686829102
PGM1-CDG	hsa00520	Amino sugar and nucleotide sugar metabolism	0.00817856534332939	PGM1	0.0132901686829102
PGM1-CDG	hsa00500	Starch and sucrose metabolism	0.00920088601124547	PGM1	0.0132901686829102
PGM1-CDG	hsa00010	Glycolysis / Gluconeogenesis	0.0110751405690919	PGM1	0.0132901686829102
PGM1-CDG	hsa00230	Purine metabolism	0.0276026580337366	PGM1	0.0276026580337366
X-linked mendelian susceptibility to mycobacterial diseases due to CYBB deficiency	hsa04670	Leukocyte transendothelial migration	0.0197648662463792	CYBB	0.0260691770318624
X-linked mendelian susceptibility to mycobacterial diseases due to CYBB deficiency	hsa04380	Osteoclast differentiation	0.0218095075822118	CYBB	0.0260691770318624
X-linked mendelian susceptibility to mycobacterial diseases due to CYBB deficiency	hsa04145	Phagosome	0.0260691770318624	CYBB	0.0260691770318624
X-linked mendelian susceptibility to mycobacterial diseases due to IKBKG deficiency	hsa05340	Primary immunodeficiency	0.00596353722951104	IKBKG	0.0238140579114591
X-linked mendelian susceptibility to mycobacterial diseases due to IKBKG deficiency	hsa04623	Cytosolic DNA-sensing pathway	0.00954165956721764	IKBKG	0.0238140579114591
X-linked mendelian susceptibility to mycobacterial diseases due to IKBKG deficiency	hsa05221	Acute myeloid leukemia	0.00971204634520362	IKBKG	0.0238140579114591
X-linked mendelian susceptibility to mycobacterial diseases due to IKBKG deficiency	hsa04621	NOD-like receptor signaling pathway	0.0098824331231897	IKBKG	0.0238140579114591
X-linked mendelian susceptibility to mycobacterial diseases due to IKBKG deficiency	hsa05131	Shigellosis	0.0103935934571479	IKBKG	0.0238140579114591
X-linked mendelian susceptibility to mycobacterial diseases due to IKBKG deficiency	hsa04920	Adipocytokine signaling pathway	0.01158630090305	IKBKG	0.0238140579114591
X-linked mendelian susceptibility to mycobacterial diseases due to IKBKG deficiency	hsa05120	Epithelial cell signaling in Helicobacter pylori infection	0.01158630090305	IKBKG	0.0238140579114591
X-linked mendelian susceptibility to mycobacterial diseases due to IKBKG deficiency	hsa05212	Pancreatic cancer	0.011927074459022	IKBKG	0.0238140579114591
X-linked mendelian susceptibility to mycobacterial diseases due to IKBKG deficiency	hsa04622	RIG-I-like receptor signaling pathway	0.0120974612370082	IKBKG	0.0238140579114591
X-linked mendelian susceptibility to mycobacterial diseases due to IKBKG deficiency	hsa05220	Chronic myeloid leukemia	0.0124382347929801	IKBKG	0.0238140579114591
X-linked mendelian susceptibility to mycobacterial diseases due to IKBKG deficiency	hsa04662	B cell receptor signaling pathway	0.0127790083489521	IKBKG	0.0238140579114591
X-linked mendelian susceptibility to mycobacterial diseases due to IKBKG deficiency	hsa05222	Small cell lung cancer	0.0144828761288124	IKBKG	0.0238140579114591
X-linked mendelian susceptibility to mycobacterial diseases due to IKBKG deficiency	hsa04210	Apoptosis	0.0148236496847843	IKBKG	0.0238140579114591
X-linked mendelian susceptibility to mycobacterial diseases due to IKBKG deficiency	hsa05215	Prostate cancer	0.0151644232407567	IKBKG	0.0238140579114591
X-linked mendelian susceptibility to mycobacterial diseases due to IKBKG deficiency	hsa04620	Toll-like receptor signaling pathway	0.0173794513545749	IKBKG	0.0238140579114591
X-linked mendelian susceptibility to mycobacterial diseases due to IKBKG deficiency	hsa05142	Chagas disease (American trypanosomiasis)	0.0177202249105469	IKBKG	0.0238140579114591
X-linked mendelian susceptibility to mycobacterial diseases due to IKBKG deficiency	hsa04660	T cell receptor signaling pathway	0.0184017720224912	IKBKG	0.0238140579114591
X-linked mendelian susceptibility to mycobacterial diseases due to IKBKG deficiency	hsa04380	Osteoclast differentiation	0.0218095075822118	IKBKG	0.0251150110751405
X-linked mendelian susceptibility to mycobacterial diseases due to IKBKG deficiency	hsa05145	Toxoplasmosis	0.0224910546941557	IKBKG	0.0251150110751405
X-linked mendelian susceptibility to mycobacterial diseases due to IKBKG deficiency	hsa05160	Hepatitis C	0.0228318282501278	IKBKG	0.0251150110751405
X-linked mendelian susceptibility to mycobacterial diseases due to IKBKG deficiency	hsa04062	Chemokine signaling pathway	0.0322031010393593	IKBKG	0.0337365820412336
X-linked mendelian susceptibility to mycobacterial diseases due to IKBKG deficiency	hsa04010	MAPK signaling pathway	0.0456636565002557	IKBKG	0.0456636565002557
Papillary renal cell carcinoma	hsa05218	Melanoma	0.000144311909780259	MITF, MET	0.00144311909780259
Papillary renal cell carcinoma	hsa05200	Pathways in cancer	0.00307642793585884	MITF, MET	0.0153821396792942
Papillary renal cell carcinoma	hsa05144	Malaria	0.0173054080205831	MET	0.0353197902973317
Papillary renal cell carcinoma	hsa05120	Epithelial cell signaling in Helicobacter pylori infection	0.0230403110493677	MET	0.0353197902973317
Papillary renal cell carcinoma	hsa05100	Bacterial invasion of epithelial cells	0.0237139021324828	MET	0.0353197902973317
Papillary renal cell carcinoma	hsa05211	Renal cell carcinoma	0.0237139021324828	MET	0.0353197902973317
Papillary renal cell carcinoma	hsa04520	Adherens junction	0.0247238532081322	MET	0.0353197902973317
Papillary renal cell carcinoma	hsa04916	Melanogenesis	0.0341248594773667	MITF	0.0426560743467083
Papillary renal cell carcinoma	hsa04380	Osteoclast differentiation	0.0431469961693753	MITF	0.0434803363553468
Papillary renal cell carcinoma	hsa04360	Axon guidance	0.0434803363553468	MET	0.0434803363553468
Fibrodysplasia ossificans progressiva	hsa04350	TGF-beta signaling pathway	0.0143124893508263	ACVR1	0.0286249787016526
Fibrodysplasia ossificans progressiva	hsa04060	Cytokine-cytokine receptor interaction	0.0451524961662976	ACVR1	0.0451524961662976
MiT family translocation renal cell carcinoma	hsa05100	Bacterial invasion of epithelial cells	0.011927074459022	CLTC	0.0342477423751917
MiT family translocation renal cell carcinoma	hsa04142	Lysosome	0.0206168001363094	CLTC	0.0342477423751917
MiT family translocation renal cell carcinoma	hsa05016	Huntington's disease	0.0311807803714431	CLTC	0.0342477423751917
MiT family translocation renal cell carcinoma	hsa04144	Endocytosis	0.0342477423751917	CLTC	0.0342477423751917
Carney complex-trismus-pseudocamptodactyly syndrome	hsa05416	Viral myocarditis	0.011927074459022	MYH8	0.0224910546941557
Carney complex-trismus-pseudocamptodactyly syndrome	hsa04530	Tight junction	0.0224910546941557	MYH8	0.0224910546941557
Inherited cancer-predisposing syndrome due to biallelic BRCA2 mutations	hsa03440	Homologous recombination	0.00477082978360888	BRCA2	0.00954165956721775
Inherited cancer-predisposing syndrome due to biallelic BRCA2 mutations	hsa05212	Pancreatic cancer	0.011927074459022	BRCA2	0.011927074459022
Gorlin syndrome	hsa05217	Basal cell carcinoma	7.79044051886248e-07	PTCH1, PTCH2, SUFU	1.23471132751783e-06
Gorlin syndrome	hsa04340	Hedgehog signaling pathway	8.23140885011887e-07	PTCH1, PTCH2, SUFU	1.23471132751783e-06
Gorlin syndrome	hsa05200	Pathways in cancer	0.000169893071624044	PTCH1, PTCH2, SUFU	0.000169893071624044
Wiedemann-Steiner syndrome	hsa04114	Oocyte meiosis	0.0190833191344352	SMC1A	0.0211279604702675
Wiedemann-Steiner syndrome	hsa04110	Cell cycle	0.0211279604702675	SMC1A	0.0211279604702675
Severe combined immunodeficiency due to DNA-PKcs deficiency	hsa03450	Non-homologous end-joining	0.00221502811381846	PRKDC	0.00443005622763692
Severe combined immunodeficiency due to DNA-PKcs deficiency	hsa04110	Cell cycle	0.0211279604702675	PRKDC	0.0211279604702675
X-linked non progressive cerebellar ataxia	hsa04970	Salivary secretion	0.0151644232407567	ATP2B3	0.0258135968648832
X-linked non progressive cerebellar ataxia	hsa04972	Pancreatic secretion	0.0172090645765888	ATP2B3	0.0258135968648832
X-linked non progressive cerebellar ataxia	hsa04020	Calcium signaling pathway	0.0301584597035269	ATP2B3	0.0301584597035269
Primary hypereosinophilic syndrome	hsa05218	Melanoma	1.66783163224125e-05	FGFR1, PDGFRB, PDGFRA	0.000181419395893379
Primary hypereosinophilic syndrome	hsa05215	Prostate cancer	3.2985344707887e-05	FGFR1, PDGFRB, PDGFRA	0.000181419395893379
Primary hypereosinophilic syndrome	hsa04810	Regulation of actin cytoskeleton	0.000446588906028122	FGFR1, PDGFRB, PDGFRA	0.00163749265543645
Primary hypereosinophilic syndrome	hsa04010	MAPK signaling pathway	0.000879329349359812	FGFR1, PDGFRB, PDGFRA	0.00241815571073948
Primary hypereosinophilic syndrome	hsa05214	Glioma	0.0011821862835903	PDGFRB, PDGFRA	0.00260080982389867
Primary hypereosinophilic syndrome	hsa05200	Pathways in cancer	0.00156168978388488	FGFR1, PDGFRB, PDGFRA	0.00286309793712228
Primary hypereosinophilic syndrome	hsa04540	Gap junction	0.00225683385364911	PDGFRB, PDGFRA	0.00354645319859145
Primary hypereosinophilic syndrome	hsa04020	Calcium signaling pathway	0.00851777783448366	PDGFRB, PDGFRA	0.011711944522415
Primary hypereosinophilic syndrome	hsa04510	Focal adhesion	0.0107960152266947	PDGFRB, PDGFRA	0.0131951297215158
Primary hypereosinophilic syndrome	hsa04060	Cytokine-cytokine receptor interaction	0.0185530584546492	PDGFRB, PDGFRA	0.0202867312661017
Primary hypereosinophilic syndrome	hsa04320	Dorso-ventral axis formation	0.0202867312661017	ETV6	0.0202867312661017
Noonan syndrome	hsa05211	Renal cell carcinoma	8.93037513931026e-13	PTPN11, SOS1, RAF1, SOS2, BRAF, NRAS, KRAS	2.24349531371116e-11
Noonan syndrome	hsa05220	Chronic myeloid leukemia	1.2127001695736e-12	PTPN11, SOS1, RAF1, SOS2, BRAF, NRAS, KRAS	2.24349531371116e-11
Noonan syndrome	hsa05213	Endometrial cancer	2.96000273927984e-11	SOS1, RAF1, SOS2, BRAF, NRAS, KRAS	3.47041048876649e-10
Noonan syndrome	hsa05223	Non-small cell lung cancer	3.7517951229908e-11	SOS1, RAF1, SOS2, BRAF, NRAS, KRAS	3.47041048876649e-10
Noonan syndrome	hsa05221	Acute myeloid leukemia	5.26444902222285e-11	SOS1, RAF1, SOS2, BRAF, NRAS, KRAS	3.89569227644491e-10
Noonan syndrome	hsa04722	Neurotrophin signaling pathway	6.5428425489821e-11	PTPN11, SOS1, RAF1, SOS2, BRAF, NRAS, KRAS	4.03475290520563e-10
Noonan syndrome	hsa04650	Natural killer cell mediated cytotoxicity	1.06571040149199e-10	PTPN11, SOS1, RAF1, SOS2, BRAF, NRAS, KRAS	5.5225150653005e-10
Noonan syndrome	hsa05214	Glioma	1.19405731141633e-10	SOS1, RAF1, SOS2, BRAF, NRAS, KRAS	5.5225150653005e-10
Noonan syndrome	hsa04010	MAPK signaling pathway	1.47776577415883e-10	RRAS, SOS1, RAF1, RASA2, SOS2, BRAF, NRAS, KRAS	6.07525929376407e-10
Noonan syndrome	hsa04012	ErbB signaling pathway	7.22925921547758e-10	SOS1, RAF1, SOS2, BRAF, NRAS, KRAS	2.6748259097267e-09
Noonan syndrome	hsa05215	Prostate cancer	8.31168542187912e-10	SOS1, RAF1, SOS2, BRAF, NRAS, KRAS	2.79574873281389e-09
Noonan syndrome	hsa04810	Regulation of actin cytoskeleton	2.54790316768341e-09	RRAS, SOS1, RAF1, SOS2, BRAF, NRAS, KRAS	7.85603476702384e-09
Noonan syndrome	hsa05160	Hepatitis C	1.00631514036046e-08	SOS1, RAF1, SOS2, BRAF, NRAS, KRAS	2.86412770717978e-08
Noonan syndrome	hsa04910	Insulin signaling pathway	1.20240814211568e-08	SOS1, RAF1, SOS2, BRAF, NRAS, KRAS	3.17779294702002e-08
Noonan syndrome	hsa04662	B cell receptor signaling pathway	3.6068917362886e-08	SOS1, RAF1, SOS2, NRAS, KRAS	8.89699961617854e-08
Noonan syndrome	hsa04664	Fc epsilon RI signaling pathway	4.6991215458582e-08	SOS1, RAF1, SOS2, NRAS, KRAS	1.08667185747971e-07
Noonan syndrome	hsa04062	Chemokine signaling pathway	7.99193916538269e-08	SOS1, RAF1, SOS2, BRAF, NRAS, KRAS	1.73942205364211e-07
Noonan syndrome	hsa04540	Gap junction	9.10579380945593e-08	SOS1, RAF1, SOS2, NRAS, KRAS	1.87174650527705e-07
Noonan syndrome	hsa04912	GnRH signaling pathway	1.63076302794659e-07	SOS1, RAF1, SOS2, NRAS, KRAS	3.17569642284337e-07
Noonan syndrome	hsa04660	T cell receptor signaling pathway	2.28571165002186e-07	SOS1, RAF1, SOS2, NRAS, KRAS	4.22856655254044e-07
Noonan syndrome	hsa05219	Bladder cancer	2.78248604096665e-07	RAF1, BRAF, NRAS, KRAS	4.90247540551266e-07
Noonan syndrome	hsa05200	Pathways in cancer	2.0457214963292e-06	SOS1, RAF1, SOS2, BRAF, NRAS, KRAS	3.44053160746274e-06
Noonan syndrome	hsa04720	Long-term potentiation	2.2359447909568e-06	RAF1, BRAF, NRAS, KRAS	3.44708155272507e-06
Noonan syndrome	hsa04730	Long-term depression	2.2359447909568e-06	RAF1, BRAF, NRAS, KRAS	3.44708155272507e-06
Noonan syndrome	hsa05218	Melanoma	2.36780587140498e-06	RAF1, BRAF, NRAS, KRAS	3.50435268967937e-06
Noonan syndrome	hsa04320	Dorso-ventral axis formation	4.96781830762762e-06	SOS1, SOS2, KRAS	7.06958759162392e-06
Noonan syndrome	hsa05216	Thyroid cancer	8.93416620874921e-06	BRAF, NRAS, KRAS	1.22431166564341e-05
Noonan syndrome	hsa05210	Colorectal cancer	9.01507091200579e-05	RAF1, BRAF, KRAS	0.000119127722765791
Noonan syndrome	hsa05212	Pancreatic cancer	0.00012967967904412	RAF1, BRAF, KRAS	0.000165453383608015
Noonan syndrome	hsa04510	Focal adhesion	0.000144161432618805	SOS1, RAF1, SOS2, BRAF	0.00017779910022986
Noonan syndrome	hsa04370	VEGF signaling pathway	0.00016577189589257	RAF1, NRAS, KRAS	0.000197856778968551
Noonan syndrome	hsa04914	Progesterone-mediated oocyte maturation	0.000239467257178129	RAF1, BRAF, KRAS	0.000276884016112212
Noonan syndrome	hsa04916	Melanogenesis	0.000385450373745543	RAF1, NRAS, KRAS	0.000432171631169245
Noonan syndrome	hsa04530	Tight junction	0.000845998097269009	RRAS, NRAS, KRAS	0.00092064498820451
Noonan syndrome	hsa04630	Jak-STAT signaling pathway	0.00135010633788284	PTPN11, SOS1, SOS2	0.00142725527147615
Noonan syndrome	hsa04270	Vascular smooth muscle contraction	0.0127335245303475	RAF1, BRAF	0.0130872335450794
Noonan syndrome	hsa04360	Axon guidance	0.0155986164635533	NRAS, KRAS	0.0155986164635533
Mild Canavan disease	hsa00340	Histidine metabolism	0.00494121656159496	ASPA	0.00545237689555289
Mild Canavan disease	hsa00250	Alanine, aspartate and glutamate metabolism	0.00545237689555289	ASPA	0.00545237689555289
Severe Canavan disease	hsa00340	Histidine metabolism	0.00494121656159496	ASPA	0.00545237689555289
Severe Canavan disease	hsa00250	Alanine, aspartate and glutamate metabolism	0.00545237689555289	ASPA	0.00545237689555289
Combined immunodeficiency due to STK4 deficiency	hsa05223	Non-small cell lung cancer	0.00920088601124547	STK4	0.0184017720224909
Combined immunodeficiency due to STK4 deficiency	hsa04010	MAPK signaling pathway	0.0456636565002557	STK4	0.0456636565002557
Short stature due to partial GHR deficiency	hsa04630	Jak-STAT signaling pathway	0.0264099505878344	GHR	0.0463452036121997
Short stature due to partial GHR deficiency	hsa04060	Cytokine-cytokine receptor interaction	0.0451524961662976	GHR	0.0463452036121997
Short stature due to partial GHR deficiency	hsa04080	Neuroactive ligand-receptor interaction	0.0463452036121997	GHR	0.0463452036121997
Ataxia-telangiectasia variant	hsa04115	p53 signaling pathway	0.01158630090305	ATM	0.0211279604702675
Ataxia-telangiectasia variant	hsa04210	Apoptosis	0.0148236496847843	ATM	0.0211279604702675
Ataxia-telangiectasia variant	hsa04110	Cell cycle	0.0211279604702675	ATM	0.0211279604702675
Ataxia-intellectual disability-oculomotor apraxia-cerebellar cysts syndrome	hsa05222	Small cell lung cancer	0.0144828761288124	LAMA1	0.0281138183676946
Ataxia-intellectual disability-oculomotor apraxia-cerebellar cysts syndrome	hsa04512	ECM-receptor interaction	0.0144828761288124	LAMA1	0.0281138183676946
Ataxia-intellectual disability-oculomotor apraxia-cerebellar cysts syndrome	hsa05146	Amoebiasis	0.0180609984665191	LAMA1	0.0281138183676946
Ataxia-intellectual disability-oculomotor apraxia-cerebellar cysts syndrome	hsa05145	Toxoplasmosis	0.0224910546941557	LAMA1	0.0281138183676946
Ataxia-intellectual disability-oculomotor apraxia-cerebellar cysts syndrome	hsa04510	Focal adhesion	0.0340773555972058	LAMA1	0.0340773555972058
Acute myeloid leukemia with t(8;16)(p11;p13) translocation	hsa04330	Notch signaling pathway	0.0080081785653433	CREBBP	0.0270428157632109
Acute myeloid leukemia with t(8;16)(p11;p13) translocation	hsa04720	Long-term potentiation	0.011927074459022	CREBBP	0.0270428157632109
Acute myeloid leukemia with t(8;16)(p11;p13) translocation	hsa05211	Renal cell carcinoma	0.011927074459022	CREBBP	0.0270428157632109
Acute myeloid leukemia with t(8;16)(p11;p13) translocation	hsa04520	Adherens junction	0.0124382347929801	CREBBP	0.0270428157632109
Acute myeloid leukemia with t(8;16)(p11;p13) translocation	hsa04350	TGF-beta signaling pathway	0.0143124893508263	CREBBP	0.0270428157632109
Acute myeloid leukemia with t(8;16)(p11;p13) translocation	hsa05215	Prostate cancer	0.0151644232407567	CREBBP	0.0270428157632109
Acute myeloid leukemia with t(8;16)(p11;p13) translocation	hsa04916	Melanogenesis	0.0172090645765888	CREBBP	0.0270428157632109
Acute myeloid leukemia with t(8;16)(p11;p13) translocation	hsa04110	Cell cycle	0.0211279604702675	CREBBP	0.0290509456466178
Acute myeloid leukemia with t(8;16)(p11;p13) translocation	hsa04310	Wnt signaling pathway	0.0255580166979043	CREBBP	0.0290509456466178
Acute myeloid leukemia with t(8;16)(p11;p13) translocation	hsa04630	Jak-STAT signaling pathway	0.0264099505878344	CREBBP	0.0290509456466178
Acute myeloid leukemia with t(8;16)(p11;p13) translocation	hsa05016	Huntington's disease	0.0311807803714431	CREBBP	0.0311807803714431
Muscle-eye-brain disease with bilateral multicystic leucodystrophy	hsa05416	Viral myocarditis	0.011927074459022	DAG1	0.0153348100187426
Muscle-eye-brain disease with bilateral multicystic leucodystrophy	hsa05412	Arrhythmogenic right ventricular cardiomyopathy (ARVC)	0.012608621570966	DAG1	0.0153348100187426
Muscle-eye-brain disease with bilateral multicystic leucodystrophy	hsa05410	Hypertrophic cardiomyopathy (HCM)	0.0141421025728402	DAG1	0.0153348100187426
Muscle-eye-brain disease with bilateral multicystic leucodystrophy	hsa04512	ECM-receptor interaction	0.0144828761288124	DAG1	0.0153348100187426
Muscle-eye-brain disease with bilateral multicystic leucodystrophy	hsa05414	Dilated cardiomyopathy	0.0153348100187426	DAG1	0.0153348100187426
STT3A-CDG	hsa00510	N-Glycan biosynthesis	0.00834895212131526	STT3A	0.0166979042426305
STT3A-CDG	hsa04141	Protein processing in endoplasmic reticulum	0.0281138183676948	STT3A	0.0281138183676948
Lesch-Nyhan syndrome	hsa00983	Drug metabolism - other enzymes	0.00886011245527352	HPRT1	0.017720224910547
Lesch-Nyhan syndrome	hsa00230	Purine metabolism	0.0276026580337366	HPRT1	0.0276026580337366
STT3B-CDG	hsa00510	N-Glycan biosynthesis	0.00834895212131526	STT3B	0.0166979042426305
STT3B-CDG	hsa04141	Protein processing in endoplasmic reticulum	0.0281138183676948	STT3B	0.0281138183676948
XYLT1-CDG	hsa00532	Glycosaminoglycan biosynthesis - chondroitin sulfate / dermatan sulfate	0.00374850911569258	XYLT1	0.00443005622763659
XYLT1-CDG	hsa00534	Glycosaminoglycan biosynthesis - heparan sulfate / heparin	0.00443005622763659	XYLT1	0.00443005622763659
Congenital muscular dystrophy with cerebellar involvement	hsa00514	Other types of O-glycan biosynthesis	1.7931576181153e-06	POMGNT1, POMT1, POMT2	5.3794728543459e-06
Congenital muscular dystrophy with cerebellar involvement	hsa00051	Fructose and mannose metabolism	0.0243170262139472	GMPPB	0.0323232724021314
Congenital muscular dystrophy with cerebellar involvement	hsa00520	Amino sugar and nucleotide sugar metabolism	0.0323232724021314	GMPPB	0.0323232724021314
Congenital muscular dystrophy with intellectual disability	hsa00514	Other types of O-glycan biosynthesis	0.000179415760466397	POMT1, POMT2	0.000538247281399192
Congenital muscular dystrophy with intellectual disability	hsa00051	Fructose and mannose metabolism	0.0182922256897108	GMPPB	0.0243396899124961
Congenital muscular dystrophy with intellectual disability	hsa00520	Amino sugar and nucleotide sugar metabolism	0.0243396899124961	GMPPB	0.0243396899124961
Primary hyperaldosteronism-seizures-neurological abnormalities syndrome	hsa04973	Carbohydrate digestion and absorption	0.00749701823138538	CACNA1D	0.0270428157632109
Primary hyperaldosteronism-seizures-neurological abnormalities syndrome	hsa04930	Type II diabetes mellitus	0.00817856534332939	CACNA1D	0.0270428157632109
Primary hyperaldosteronism-seizures-neurological abnormalities syndrome	hsa05412	Arrhythmogenic right ventricular cardiomyopathy (ARVC)	0.012608621570966	CACNA1D	0.0270428157632109
Primary hyperaldosteronism-seizures-neurological abnormalities syndrome	hsa04260	Cardiac muscle contraction	0.0131197819049241	CACNA1D	0.0270428157632109
Primary hyperaldosteronism-seizures-neurological abnormalities syndrome	hsa05410	Hypertrophic cardiomyopathy (HCM)	0.0141421025728402	CACNA1D	0.0270428157632109
Primary hyperaldosteronism-seizures-neurological abnormalities syndrome	hsa05414	Dilated cardiomyopathy	0.0153348100187426	CACNA1D	0.0270428157632109
Primary hyperaldosteronism-seizures-neurological abnormalities syndrome	hsa04912	GnRH signaling pathway	0.0172090645765888	CACNA1D	0.0270428157632109
Primary hyperaldosteronism-seizures-neurological abnormalities syndrome	hsa04270	Vascular smooth muscle contraction	0.0197648662463792	CACNA1D	0.0271766910887714
Primary hyperaldosteronism-seizures-neurological abnormalities syndrome	hsa05010	Alzheimer's disease	0.0284545919236666	CACNA1D	0.0331743056738796
Primary hyperaldosteronism-seizures-neurological abnormalities syndrome	hsa04020	Calcium signaling pathway	0.0301584597035269	CACNA1D	0.0331743056738796
Primary hyperaldosteronism-seizures-neurological abnormalities syndrome	hsa04010	MAPK signaling pathway	0.0456636565002557	CACNA1D	0.0456636565002557
Li-Fraumeni syndrome	hsa04115	p53 signaling pathway	1.64903033953682e-08	CDKN2A, TP53, MDM2, CHEK2	2.47354550930523e-07
Li-Fraumeni syndrome	hsa04110	Cell cycle	1.8995889563057e-07	CDKN2A, TP53, MDM2, CHEK2	1.42469171722927e-06
Li-Fraumeni syndrome	hsa05219	Bladder cancer	1.35678758250296e-06	CDKN2A, TP53, MDM2	6.7839379125148e-06
Li-Fraumeni syndrome	hsa05214	Glioma	5.14715423812595e-06	CDKN2A, TP53, MDM2	1.83037055420931e-05
Li-Fraumeni syndrome	hsa05218	Melanoma	6.72981039019578e-06	CDKN2A, TP53, MDM2	1.83037055420931e-05
Li-Fraumeni syndrome	hsa05220	Chronic myeloid leukemia	7.32148221683723e-06	CDKN2A, TP53, MDM2	1.83037055420931e-05
Li-Fraumeni syndrome	hsa05223	Non-small cell lung cancer	0.000492743327253672	CDKN2A, TP53	0.00105587855840073
Li-Fraumeni syndrome	hsa05200	Pathways in cancer	0.000651507781483612	CDKN2A, TP53, MDM2	0.00122157709028177
Li-Fraumeni syndrome	hsa05212	Pancreatic cancer	0.000828532448312036	CDKN2A, TP53	0.00138088741385339
Li-Fraumeni syndrome	hsa05215	Prostate cancer	0.00133765818474971	TP53, MDM2	0.00200648727712457
Li-Fraumeni syndrome	hsa05216	Thyroid cancer	0.0196238334623628	TP53	0.0267597729032221
Li-Fraumeni syndrome	hsa05213	Endometrial cancer	0.0349810389587348	TP53	0.0396115373435246
Li-Fraumeni syndrome	hsa05014	Amyotrophic lateral sclerosis (ALS)	0.0356446242852203	TP53	0.0396115373435246
Li-Fraumeni syndrome	hsa05217	Basal cell carcinoma	0.0369707681872896	TP53	0.0396115373435246
Li-Fraumeni syndrome	hsa05210	Colorectal cancer	0.0416015033170906	TP53	0.0416015033170906
CADDS	hsa02010	ABC transporters	0.0149390992126086	ABCD1	0.026742187382946
CADDS	hsa04146	Peroxisome	0.026742187382946	ABCD1	0.026742187382946
Methylmalonic acidemia with homocystinuria, type cblJ	hsa02010	ABC transporters	0.00749701823138538	ABCD4	0.0134605554608964
Methylmalonic acidemia with homocystinuria, type cblJ	hsa04146	Peroxisome	0.0134605554608964	ABCD4	0.0134605554608964
Severe dermatitis-multiple allergies-metabolic wasting syndrome	hsa05150	Staphylococcus aureus infection	0.0186563068718139	DSG1	0.0250603874202756
Severe dermatitis-multiple allergies-metabolic wasting syndrome	hsa05412	Arrhythmogenic right ventricular cardiomyopathy (ARVC)	0.0250603874202756	DSP	0.0250603874202756
Severe early-childhood-onset retinal dystrophy	hsa00830	Retinol metabolism	0.000117075577511872	RPE65, LRAT	0.000234151155023745
Severe early-childhood-onset retinal dystrophy	hsa04977	Vitamin digestion and absorption	0.00816253713926518	LRAT	0.00816253713926518
X-linked intellectual disability due to GRIA3 mutations	hsa04730	Long-term depression	0.011927074459022	GRIA3	0.0238541489180439
X-linked intellectual disability due to GRIA3 mutations	hsa04080	Neuroactive ligand-receptor interaction	0.0463452036121997	GRIA3	0.0463452036121997
Familial benign flecked retina	hsa00592	alpha-Linolenic acid metabolism	0.00340773555972052	PLA2G5	0.0212036879271502
Familial benign flecked retina	hsa00591	Linoleic acid metabolism	0.00511160333958083	PLA2G5	0.0212036879271502
Familial benign flecked retina	hsa00565	Ether lipid metabolism	0.00613392400749713	PLA2G5	0.0212036879271502
Familial benign flecked retina	hsa04975	Fat digestion and absorption	0.00783779178735711	PLA2G5	0.0212036879271502
Familial benign flecked retina	hsa00590	Arachidonic acid metabolism	0.0100528199011756	PLA2G5	0.0212036879271502
Familial benign flecked retina	hsa04730	Long-term depression	0.011927074459022	PLA2G5	0.0212036879271502
Familial benign flecked retina	hsa04370	VEGF signaling pathway	0.012949395126938	PLA2G5	0.0212036879271502
Familial benign flecked retina	hsa04664	Fc epsilon RI signaling pathway	0.0134605554608964	PLA2G5	0.0212036879271502
Familial benign flecked retina	hsa00564	Glycerophospholipid metabolism	0.0136309422388823	PLA2G5	0.0212036879271502
Familial benign flecked retina	hsa04912	GnRH signaling pathway	0.0172090645765888	PLA2G5	0.0219024458247493
Familial benign flecked retina	hsa04972	Pancreatic secretion	0.0172090645765888	PLA2G5	0.0219024458247493
Familial benign flecked retina	hsa04270	Vascular smooth muscle contraction	0.0197648662463792	PLA2G5	0.0230590106207757
Familial benign flecked retina	hsa05145	Toxoplasmosis	0.0224910546941557	PLA2G5	0.0242211358244754
Familial benign flecked retina	hsa04010	MAPK signaling pathway	0.0456636565002557	PLA2G5	0.0456636565002557
Noonan syndrome-like disorder with juvenile myelomonocytic leukemia	hsa05100	Bacterial invasion of epithelial cells	0.011927074459022	CBL	0.0301828006718107
Noonan syndrome-like disorder with juvenile myelomonocytic leukemia	hsa05220	Chronic myeloid leukemia	0.0124382347929801	CBL	0.0301828006718107
Noonan syndrome-like disorder with juvenile myelomonocytic leukemia	hsa04012	ErbB signaling pathway	0.0148236496847843	CBL	0.0301828006718107
Noonan syndrome-like disorder with juvenile myelomonocytic leukemia	hsa04660	T cell receptor signaling pathway	0.0184017720224912	CBL	0.0301828006718107
Noonan syndrome-like disorder with juvenile myelomonocytic leukemia	hsa04120	Ubiquitin mediated proteolysis	0.0230022150281138	CBL	0.0301828006718107
Noonan syndrome-like disorder with juvenile myelomonocytic leukemia	hsa04910	Insulin signaling pathway	0.023513375362072	CBL	0.0301828006718107
Noonan syndrome-like disorder with juvenile myelomonocytic leukemia	hsa04630	Jak-STAT signaling pathway	0.0264099505878344	CBL	0.0301828006718107
Noonan syndrome-like disorder with juvenile myelomonocytic leukemia	hsa04144	Endocytosis	0.0342477423751917	CBL	0.0342477423751917
Waardenburg syndrome type 2	hsa04916	Melanogenesis	1.95465556645871e-05	KITLG, MITF, EDNRB	7.81862226583485e-05
Waardenburg syndrome type 2	hsa05200	Pathways in cancer	0.0171274875471733	KITLG, MITF	0.0342549750943466
Waardenburg syndrome type 2	hsa05218	Melanoma	0.0475307426485889	MITF	0.0488446064659301
Waardenburg syndrome type 2	hsa04520	Adherens junction	0.0488446064659301	SNAI2	0.0488446064659301
Childhood-onset autosomal recessive myopathy with external ophthalmoplegia	hsa05416	Viral myocarditis	0.011927074459022	MYH2	0.0224910546941557
Childhood-onset autosomal recessive myopathy with external ophthalmoplegia	hsa04530	Tight junction	0.0224910546941557	MYH2	0.0224910546941557
Fetal akinesia-cerebral and retinal hemorrhage syndrome	hsa05100	Bacterial invasion of epithelial cells	0.011927074459022	DNM2	0.0240245356960299
Fetal akinesia-cerebral and retinal hemorrhage syndrome	hsa04666	Fc gamma R-mediated phagocytosis	0.0160163571306866	DNM2	0.0240245356960299
Fetal akinesia-cerebral and retinal hemorrhage syndrome	hsa04144	Endocytosis	0.0342477423751917	DNM2	0.0342477423751917
Autosomal recessive congenital cerebellar ataxia due to GRID2 deficiency	hsa04730	Long-term depression	0.011927074459022	GRID2	0.0238541489180439
Autosomal recessive congenital cerebellar ataxia due to GRID2 deficiency	hsa04080	Neuroactive ligand-receptor interaction	0.0463452036121997	GRID2	0.0463452036121997
LMNA-related cardiocutaneous progeria syndrome	hsa05412	Arrhythmogenic right ventricular cardiomyopathy (ARVC)	0.012608621570966	LMNA	0.0153348100187426
LMNA-related cardiocutaneous progeria syndrome	hsa05410	Hypertrophic cardiomyopathy (HCM)	0.0141421025728402	LMNA	0.0153348100187426
LMNA-related cardiocutaneous progeria syndrome	hsa05414	Dilated cardiomyopathy	0.0153348100187426	LMNA	0.0153348100187426
GMPPB-related limb-girdle muscular dystrophy R19	hsa00051	Fructose and mannose metabolism	0.00613392400749713	GMPPB	0.00817856534332939
GMPPB-related limb-girdle muscular dystrophy R19	hsa00520	Amino sugar and nucleotide sugar metabolism	0.00817856534332939	GMPPB	0.00817856534332939
Mandibular hypoplasia-deafness-progeroid features-lipodystrophy syndrome	hsa03430	Mismatch repair	0.00391889589367878	POLD1	0.0104958255239395
Mandibular hypoplasia-deafness-progeroid features-lipodystrophy syndrome	hsa03440	Homologous recombination	0.00477082978360888	POLD1	0.0104958255239395
Mandibular hypoplasia-deafness-progeroid features-lipodystrophy syndrome	hsa03410	Base excision repair	0.00562276367353898	POLD1	0.0104958255239395
Mandibular hypoplasia-deafness-progeroid features-lipodystrophy syndrome	hsa03030	DNA replication	0.00613392400749713	POLD1	0.0104958255239395
Mandibular hypoplasia-deafness-progeroid features-lipodystrophy syndrome	hsa03420	Nucleotide excision repair	0.00749701823138538	POLD1	0.0104958255239395
Mandibular hypoplasia-deafness-progeroid features-lipodystrophy syndrome	hsa00240	Pyrimidine metabolism	0.0168682910206168	POLD1	0.0196796728573863
Mandibular hypoplasia-deafness-progeroid features-lipodystrophy syndrome	hsa00230	Purine metabolism	0.0276026580337366	POLD1	0.0276026580337366
Acroosteolysis-keloid-like lesions-premature aging syndrome	hsa05214	Glioma	0.0110751405690919	PDGFRB	0.0345033225421708
Acroosteolysis-keloid-like lesions-premature aging syndrome	hsa05218	Melanoma	0.0120974612370082	PDGFRB	0.0345033225421708
Acroosteolysis-keloid-like lesions-premature aging syndrome	hsa05215	Prostate cancer	0.0151644232407567	PDGFRB	0.0345033225421708
Acroosteolysis-keloid-like lesions-premature aging syndrome	hsa04540	Gap junction	0.0153348100187426	PDGFRB	0.0345033225421708
Acroosteolysis-keloid-like lesions-premature aging syndrome	hsa04020	Calcium signaling pathway	0.0301584597035269	PDGFRB	0.0456636565002557
Acroosteolysis-keloid-like lesions-premature aging syndrome	hsa04510	Focal adhesion	0.0340773555972058	PDGFRB	0.0456636565002557
Acroosteolysis-keloid-like lesions-premature aging syndrome	hsa04810	Regulation of actin cytoskeleton	0.0362923837110242	PDGFRB	0.0456636565002557
Acroosteolysis-keloid-like lesions-premature aging syndrome	hsa04060	Cytokine-cytokine receptor interaction	0.0451524961662976	PDGFRB	0.0456636565002557
Acroosteolysis-keloid-like lesions-premature aging syndrome	hsa04010	MAPK signaling pathway	0.0456636565002557	PDGFRB	0.0456636565002557
Acute encephalopathy with biphasic seizures and late reduced diffusion	hsa04270	Vascular smooth muscle contraction	0.0197648662463792	ADORA2A	0.0452376895552904
Acute encephalopathy with biphasic seizures and late reduced diffusion	hsa04020	Calcium signaling pathway	0.0301584597035269	ADORA2A	0.0452376895552904
Acute encephalopathy with biphasic seizures and late reduced diffusion	hsa04080	Neuroactive ligand-receptor interaction	0.0463452036121997	ADORA2A	0.0463452036121997
Non-seminomatous germ cell tumor of testis	hsa04640	Hematopoietic cell lineage	0.029765768703956	KITLG	0.0341248594773667
Non-seminomatous germ cell tumor of testis	hsa04916	Melanogenesis	0.0341248594773667	KITLG	0.0341248594773667
Combined immunodeficiency due to IL21R deficiency	hsa04630	Jak-STAT signaling pathway	0.0264099505878344	IL21R	0.0451524961662976
Combined immunodeficiency due to IL21R deficiency	hsa04060	Cytokine-cytokine receptor interaction	0.0451524961662976	IL21R	0.0451524961662976
Severe combined immunodeficiency due to CARD11 deficiency	hsa04662	B cell receptor signaling pathway	0.0127790083489521	CARD11	0.0184017720224912
Severe combined immunodeficiency due to CARD11 deficiency	hsa04660	T cell receptor signaling pathway	0.0184017720224912	CARD11	0.0184017720224912
Hemolytic uremic syndrome with DGKE deficiency	hsa00561	Glycerolipid metabolism	0.00851933889930134	DGKE	0.0136309422388823
Hemolytic uremic syndrome with DGKE deficiency	hsa04070	Phosphatidylinositol signaling system	0.0132901686829102	DGKE	0.0136309422388823
Hemolytic uremic syndrome with DGKE deficiency	hsa00564	Glycerophospholipid metabolism	0.0136309422388823	DGKE	0.0136309422388823
Non-hereditary retinoblastoma	hsa05219	Bladder cancer	0.0071562446754132	RB1	0.0170599761458513
Non-hereditary retinoblastoma	hsa05223	Non-small cell lung cancer	0.00920088601124547	RB1	0.0170599761458513
Non-hereditary retinoblastoma	hsa05214	Glioma	0.0110751405690919	RB1	0.0170599761458513
Non-hereditary retinoblastoma	hsa05212	Pancreatic cancer	0.011927074459022	RB1	0.0170599761458513
Non-hereditary retinoblastoma	hsa05218	Melanoma	0.0120974612370082	RB1	0.0170599761458513
Non-hereditary retinoblastoma	hsa05220	Chronic myeloid leukemia	0.0124382347929801	RB1	0.0170599761458513
Non-hereditary retinoblastoma	hsa05222	Small cell lung cancer	0.0144828761288124	RB1	0.0170599761458513
Non-hereditary retinoblastoma	hsa05215	Prostate cancer	0.0151644232407567	RB1	0.0170599761458513
Non-hereditary retinoblastoma	hsa04110	Cell cycle	0.0211279604702675	RB1	0.0211279604702675
Hereditary retinoblastoma	hsa05219	Bladder cancer	0.0071562446754132	RB1	0.0170599761458513
Hereditary retinoblastoma	hsa05223	Non-small cell lung cancer	0.00920088601124547	RB1	0.0170599761458513
Hereditary retinoblastoma	hsa05214	Glioma	0.0110751405690919	RB1	0.0170599761458513
Hereditary retinoblastoma	hsa05212	Pancreatic cancer	0.011927074459022	RB1	0.0170599761458513
Hereditary retinoblastoma	hsa05218	Melanoma	0.0120974612370082	RB1	0.0170599761458513
Hereditary retinoblastoma	hsa05220	Chronic myeloid leukemia	0.0124382347929801	RB1	0.0170599761458513
Hereditary retinoblastoma	hsa05222	Small cell lung cancer	0.0144828761288124	RB1	0.0170599761458513
Hereditary retinoblastoma	hsa05215	Prostate cancer	0.0151644232407567	RB1	0.0170599761458513
Hereditary retinoblastoma	hsa04110	Cell cycle	0.0211279604702675	RB1	0.0211279604702675
Autosomal recessive cutis laxa type 2, classic type	hsa04966	Collecting duct acid secretion	8.68573985807996e-08	ATP6V1E1, ATP6V1A, ATP6V0A2	6.08001790065597e-07
Autosomal recessive cutis laxa type 2, classic type	hsa05110	Vibrio cholerae infection	7.36550739965182e-07	ATP6V1E1, ATP6V1A, ATP6V0A2	2.57792758987814e-06
Autosomal recessive cutis laxa type 2, classic type	hsa05120	Epithelial cell signaling in Helicobacter pylori infection	1.48818645718815e-06	ATP6V1E1, ATP6V1A, ATP6V0A2	3.47243506677236e-06
Autosomal recessive cutis laxa type 2, classic type	hsa05323	Rheumatoid arthritis	3.60747728772255e-06	ATP6V1E1, ATP6V1A, ATP6V0A2	6.31308525351445e-06
Autosomal recessive cutis laxa type 2, classic type	hsa00190	Oxidative phosphorylation	1.1125467675994e-05	ATP6V1E1, ATP6V1A, ATP6V0A2	1.55756547463915e-05
Autosomal recessive cutis laxa type 2, classic type	hsa04145	Phagosome	1.73796754912055e-05	ATP6V1E1, ATP6V1A, ATP6V0A2	2.0276288073073e-05
Autosomal recessive cutis laxa type 2, classic type	hsa01100	Metabolic pathways	0.00712215108267904	ATP6V1E1, ATP6V1A, ATP6V0A2	0.00712215108267904
Minimal pigment oculocutaneous albinism type 1	hsa00740	Riboflavin metabolism	0.0018742545578464	TYR	0.0056227636735392
Minimal pigment oculocutaneous albinism type 1	hsa00350	Tyrosine metabolism	0.00698585789742723	TYR	0.0104787868461408
Minimal pigment oculocutaneous albinism type 1	hsa04916	Melanogenesis	0.0172090645765888	TYR	0.0172090645765888
Temperature-sensitive oculocutaneous albinism type 1	hsa00740	Riboflavin metabolism	0.0018742545578464	TYR	0.0056227636735392
Temperature-sensitive oculocutaneous albinism type 1	hsa00350	Tyrosine metabolism	0.00698585789742723	TYR	0.0104787868461408
Temperature-sensitive oculocutaneous albinism type 1	hsa04916	Melanogenesis	0.0172090645765888	TYR	0.0172090645765888
Facial dysmorphism-immunodeficiency-livedo-short stature syndrome	hsa03410	Base excision repair	0.00562276367353898	POLE	0.0124950303856423
Facial dysmorphism-immunodeficiency-livedo-short stature syndrome	hsa03030	DNA replication	0.00613392400749713	POLE	0.0124950303856423
Facial dysmorphism-immunodeficiency-livedo-short stature syndrome	hsa03420	Nucleotide excision repair	0.00749701823138538	POLE	0.0124950303856423
Facial dysmorphism-immunodeficiency-livedo-short stature syndrome	hsa00240	Pyrimidine metabolism	0.0168682910206168	POLE	0.021085363775771
Facial dysmorphism-immunodeficiency-livedo-short stature syndrome	hsa00230	Purine metabolism	0.0276026580337366	POLE	0.0276026580337366
Cobblestone lissencephaly without muscular or ocular involvement	hsa05222	Small cell lung cancer	0.0144828761288124	LAMB1	0.0281138183676946
Cobblestone lissencephaly without muscular or ocular involvement	hsa04512	ECM-receptor interaction	0.0144828761288124	LAMB1	0.0281138183676946
Cobblestone lissencephaly without muscular or ocular involvement	hsa05146	Amoebiasis	0.0180609984665191	LAMB1	0.0281138183676946
Cobblestone lissencephaly without muscular or ocular involvement	hsa05145	Toxoplasmosis	0.0224910546941557	LAMB1	0.0281138183676946
Cobblestone lissencephaly without muscular or ocular involvement	hsa04510	Focal adhesion	0.0340773555972058	LAMB1	0.0340773555972058
Rubinstein-Taybi syndrome due to CREBBP mutations	hsa04330	Notch signaling pathway	0.0080081785653433	CREBBP	0.0270428157632109
Rubinstein-Taybi syndrome due to CREBBP mutations	hsa04720	Long-term potentiation	0.011927074459022	CREBBP	0.0270428157632109
Rubinstein-Taybi syndrome due to CREBBP mutations	hsa05211	Renal cell carcinoma	0.011927074459022	CREBBP	0.0270428157632109
Rubinstein-Taybi syndrome due to CREBBP mutations	hsa04520	Adherens junction	0.0124382347929801	CREBBP	0.0270428157632109
Rubinstein-Taybi syndrome due to CREBBP mutations	hsa04350	TGF-beta signaling pathway	0.0143124893508263	CREBBP	0.0270428157632109
Rubinstein-Taybi syndrome due to CREBBP mutations	hsa05215	Prostate cancer	0.0151644232407567	CREBBP	0.0270428157632109
Rubinstein-Taybi syndrome due to CREBBP mutations	hsa04916	Melanogenesis	0.0172090645765888	CREBBP	0.0270428157632109
Rubinstein-Taybi syndrome due to CREBBP mutations	hsa04110	Cell cycle	0.0211279604702675	CREBBP	0.0290509456466178
Rubinstein-Taybi syndrome due to CREBBP mutations	hsa04310	Wnt signaling pathway	0.0255580166979043	CREBBP	0.0290509456466178
Rubinstein-Taybi syndrome due to CREBBP mutations	hsa04630	Jak-STAT signaling pathway	0.0264099505878344	CREBBP	0.0290509456466178
Rubinstein-Taybi syndrome due to CREBBP mutations	hsa05016	Huntington's disease	0.0311807803714431	CREBBP	0.0311807803714431
Familial primary localized cutaneous amyloidosis	hsa04630	Jak-STAT signaling pathway	0.0264099505878344	OSMR	0.0451524961662976
Familial primary localized cutaneous amyloidosis	hsa04060	Cytokine-cytokine receptor interaction	0.0451524961662976	OSMR	0.0451524961662976
Ocular albinism with congenital sensorineural deafness	hsa04916	Melanogenesis	0.000293269675810989	TYR, MITF	0.00146634837905495
Ocular albinism with congenital sensorineural deafness	hsa00740	Riboflavin metabolism	0.00374531508952025	TYR	0.00936328772380063
Ocular albinism with congenital sensorineural deafness	hsa00350	Tyrosine metabolism	0.0139240957682872	TYR	0.0232068262804787
Ocular albinism with congenital sensorineural deafness	hsa05218	Melanoma	0.0240506105642356	MITF	0.0300632632052945
Ocular albinism with congenital sensorineural deafness	hsa04380	Osteoclast differentiation	0.0431469961693753	MITF	0.0431469961693753
Pyruvate carboxylase deficiency, benign type	hsa00020	Citrate cycle (TCA cycle)	0.00511160333958083	PC	0.00681547111944103
Pyruvate carboxylase deficiency, benign type	hsa00620	Pyruvate metabolism	0.00681547111944103	PC	0.00681547111944103
Congenital myasthenic syndromes with glycosylation defect	hsa00510	N-Glycan biosynthesis	5.40682083513563e-06	ALG2, DPAGT1, ALG14	2.70341041756782e-05
Congenital myasthenic syndromes with glycosylation defect	hsa01100	Metabolic pathways	0.000262702020841762	ALG2, DPAGT1, GFPT1, ALG14, GMPPB	0.000656755052104406
Congenital myasthenic syndromes with glycosylation defect	hsa00520	Amino sugar and nucleotide sugar metabolism	0.000644852675142165	GFPT1, GMPPB	0.00107475445857027
Congenital myasthenic syndromes with glycosylation defect	hsa00250	Alanine, aspartate and glutamate metabolism	0.0269753106169021	GFPT1	0.0303058731118667
Congenital myasthenic syndromes with glycosylation defect	hsa00051	Fructose and mannose metabolism	0.0303058731118667	GMPPB	0.0303058731118667
Pyruvate carboxylase deficiency, infantile type	hsa00020	Citrate cycle (TCA cycle)	0.00511160333958083	PC	0.00681547111944103
Pyruvate carboxylase deficiency, infantile type	hsa00620	Pyruvate metabolism	0.00681547111944103	PC	0.00681547111944103
Pyruvate carboxylase deficiency, severe neonatal type	hsa00020	Citrate cycle (TCA cycle)	0.00511160333958083	PC	0.00681547111944103
Pyruvate carboxylase deficiency, severe neonatal type	hsa00620	Pyruvate metabolism	0.00681547111944103	PC	0.00681547111944103
Rubinstein-Taybi syndrome due to 16p13.3 microdeletion	hsa04330	Notch signaling pathway	0.0080081785653433	CREBBP	0.0270428157632109
Rubinstein-Taybi syndrome due to 16p13.3 microdeletion	hsa04720	Long-term potentiation	0.011927074459022	CREBBP	0.0270428157632109
Rubinstein-Taybi syndrome due to 16p13.3 microdeletion	hsa05211	Renal cell carcinoma	0.011927074459022	CREBBP	0.0270428157632109
Rubinstein-Taybi syndrome due to 16p13.3 microdeletion	hsa04520	Adherens junction	0.0124382347929801	CREBBP	0.0270428157632109
Rubinstein-Taybi syndrome due to 16p13.3 microdeletion	hsa04350	TGF-beta signaling pathway	0.0143124893508263	CREBBP	0.0270428157632109
Rubinstein-Taybi syndrome due to 16p13.3 microdeletion	hsa05215	Prostate cancer	0.0151644232407567	CREBBP	0.0270428157632109
Rubinstein-Taybi syndrome due to 16p13.3 microdeletion	hsa04916	Melanogenesis	0.0172090645765888	CREBBP	0.0270428157632109
Rubinstein-Taybi syndrome due to 16p13.3 microdeletion	hsa04110	Cell cycle	0.0211279604702675	CREBBP	0.0290509456466178
Rubinstein-Taybi syndrome due to 16p13.3 microdeletion	hsa04310	Wnt signaling pathway	0.0255580166979043	CREBBP	0.0290509456466178
Rubinstein-Taybi syndrome due to 16p13.3 microdeletion	hsa04630	Jak-STAT signaling pathway	0.0264099505878344	CREBBP	0.0290509456466178
Rubinstein-Taybi syndrome due to 16p13.3 microdeletion	hsa05016	Huntington's disease	0.0311807803714431	CREBBP	0.0311807803714431
Hypokalemic periodic paralysis	hsa05412	Arrhythmogenic right ventricular cardiomyopathy (ARVC)	0.0250603874202756	CACNA1S	0.0391423842278754
Hypokalemic periodic paralysis	hsa04260	Cardiac muscle contraction	0.026069641617487	CACNA1S	0.0391423842278754
Hypokalemic periodic paralysis	hsa04974	Protein digestion and absorption	0.0274145008555924	KCNE3	0.0391423842278754
Hypokalemic periodic paralysis	hsa05410	Hypertrophic cardiomyopathy (HCM)	0.0280865820354262	CACNA1S	0.0391423842278754
Hypokalemic periodic paralysis	hsa05414	Dilated cardiomyopathy	0.0304370368589456	CACNA1S	0.0391423842278754
Hypokalemic periodic paralysis	hsa04912	GnRH signaling pathway	0.0341248594773667	CACNA1S	0.0391423842278754
Hypokalemic periodic paralysis	hsa04270	Vascular smooth muscle contraction	0.0391423842278754	CACNA1S	0.0391423842278754
Rubinstein-Taybi syndrome due to EP300 haploinsufficiency	hsa04330	Notch signaling pathway	0.0080081785653433	EP300	0.0270428157632109
Rubinstein-Taybi syndrome due to EP300 haploinsufficiency	hsa04720	Long-term potentiation	0.011927074459022	EP300	0.0270428157632109
Rubinstein-Taybi syndrome due to EP300 haploinsufficiency	hsa05211	Renal cell carcinoma	0.011927074459022	EP300	0.0270428157632109
Rubinstein-Taybi syndrome due to EP300 haploinsufficiency	hsa04520	Adherens junction	0.0124382347929801	EP300	0.0270428157632109
Rubinstein-Taybi syndrome due to EP300 haploinsufficiency	hsa04350	TGF-beta signaling pathway	0.0143124893508263	EP300	0.0270428157632109
Rubinstein-Taybi syndrome due to EP300 haploinsufficiency	hsa05215	Prostate cancer	0.0151644232407567	EP300	0.0270428157632109
Rubinstein-Taybi syndrome due to EP300 haploinsufficiency	hsa04916	Melanogenesis	0.0172090645765888	EP300	0.0270428157632109
Rubinstein-Taybi syndrome due to EP300 haploinsufficiency	hsa04110	Cell cycle	0.0211279604702675	EP300	0.0290509456466178
Rubinstein-Taybi syndrome due to EP300 haploinsufficiency	hsa04310	Wnt signaling pathway	0.0255580166979043	EP300	0.0290509456466178
Rubinstein-Taybi syndrome due to EP300 haploinsufficiency	hsa04630	Jak-STAT signaling pathway	0.0264099505878344	EP300	0.0290509456466178
Rubinstein-Taybi syndrome due to EP300 haploinsufficiency	hsa05016	Huntington's disease	0.0311807803714431	EP300	0.0311807803714431
Reunion Island Larsen-like syndrome	hsa00532	Glycosaminoglycan biosynthesis - chondroitin sulfate / dermatan sulfate	0.00374850911569258	B4GALT7	0.00443005622763659
Reunion Island Larsen-like syndrome	hsa00534	Glycosaminoglycan biosynthesis - heparan sulfate / heparin	0.00443005622763659	B4GALT7	0.00443005622763659
Neonatal inflammatory skin and bowel disease	hsa05120	Epithelial cell signaling in Helicobacter pylori infection	0.000132290756732165	ADAM17, EGFR	0.00198436135098247
Neonatal inflammatory skin and bowel disease	hsa04320	Dorso-ventral axis formation	0.00816253713926518	EGFR	0.035119657914168
Neonatal inflammatory skin and bowel disease	hsa05219	Bladder cancer	0.0142624883229305	EGFR	0.035119657914168
Neonatal inflammatory skin and bowel disease	hsa04330	Notch signaling pathway	0.0159535799981021	ADAM17	0.035119657914168
Neonatal inflammatory skin and bowel disease	hsa05213	Endometrial cancer	0.0176432198431953	EGFR	0.035119657914168
Neonatal inflammatory skin and bowel disease	hsa05223	Non-small cell lung cancer	0.0183186692688107	EGFR	0.035119657914168
Neonatal inflammatory skin and bowel disease	hsa05214	Glioma	0.0220294888756714	EGFR	0.035119657914168
Neonatal inflammatory skin and bowel disease	hsa05212	Pancreatic cancer	0.0237139021324828	EGFR	0.035119657914168
Neonatal inflammatory skin and bowel disease	hsa05218	Melanoma	0.0240506105642356	EGFR	0.035119657914168
Neonatal inflammatory skin and bowel disease	hsa04520	Adherens junction	0.0247238532081322	EGFR	0.035119657914168
Neonatal inflammatory skin and bowel disease	hsa04012	ErbB signaling pathway	0.029430047516656	EGFR	0.035119657914168
Neonatal inflammatory skin and bowel disease	hsa05215	Prostate cancer	0.0301014318180526	EGFR	0.035119657914168
Neonatal inflammatory skin and bowel disease	hsa04540	Gap junction	0.0304370368589456	EGFR	0.035119657914168
Neonatal inflammatory skin and bowel disease	hsa04912	GnRH signaling pathway	0.0341248594773667	EGFR	0.0365623494400357
Neonatal inflammatory skin and bowel disease	hsa05160	Hepatitis C	0.0451461661871562	EGFR	0.0451461661871562
Hypoinsulinemic hypoglycemia and body hemihypertrophy	hsa04973	Carbohydrate digestion and absorption	0.00749701823138538	AKT2	0.0257795195092864
Hypoinsulinemic hypoglycemia and body hemihypertrophy	hsa04150	mTOR signaling pathway	0.00886011245527352	AKT2	0.0257795195092864
Hypoinsulinemic hypoglycemia and body hemihypertrophy	hsa05213	Endometrial cancer	0.00886011245527352	AKT2	0.0257795195092864
Hypoinsulinemic hypoglycemia and body hemihypertrophy	hsa05223	Non-small cell lung cancer	0.00920088601124547	AKT2	0.0257795195092864
Hypoinsulinemic hypoglycemia and body hemihypertrophy	hsa05221	Acute myeloid leukemia	0.00971204634520362	AKT2	0.0257795195092864
Hypoinsulinemic hypoglycemia and body hemihypertrophy	hsa05210	Colorectal cancer	0.0105639802351337	AKT2	0.0257795195092864
Hypoinsulinemic hypoglycemia and body hemihypertrophy	hsa05214	Glioma	0.0110751405690919	AKT2	0.0257795195092864
Hypoinsulinemic hypoglycemia and body hemihypertrophy	hsa04920	Adipocytokine signaling pathway	0.01158630090305	AKT2	0.0257795195092864
[truncated: 6,355 more rows]
