# Supplementary material for: Pathway Maps of Orphan and Complex Diseases Using an Integrative Computational Approach
Source: Biomed Res Int. 2020 Nov 27;2020:4280467. doi: 10.1155/2020/4280467 (PMC7744584; doi:10.1155/2020/4280467)
Supplement: Supplementary 3 — Supplementary Table 3: Complex Diseases KEGG pathways enrichment. [file 4280467.f3.xlsx]

## Sheet: Sheet1
Supplementary File 3 : Complex Diseases KEGG Pathways enrichment
Disease Name	KEGGID	Term	Pvalue	inGenes	adjpvalsK
Adenocarcinoma	hsa05200	Pathways in cancer	1.53749711311241e-61	ABL1, AKT1, AKT2, APC, BIRC3, XIAP, BIRC5, KLK3, FAS, FASLG, AR, ARAF, RHOA, BAD, BAX, CCND1, BCL2, BCL2L1, BID, BMP2, BMP4, BRAF, BRCA2, CASP3, CASP8, CASP9, CBL, CCNE1, CDH1, CDK2, CDK4, CDK6, CDKN1A, CDKN1B, CDKN2A, CDKN2B, CHUK, COL4A5, COL4A6, CRK, CSF1R, CTNNB1, DAPK1, DCC, DVL1, DVL3, E2F1, E2F3, EGF, EGFR, EP300, EPAS1, ERBB2, ETS1, FGF1, FGF2, FGF3, FGF5, FGF7, FGF9, FGF13, FGFR1, FGFR3,…	1.41449734406342e-59
Adenocarcinoma	hsa05215	Prostate cancer	1.41953220813491e-26	AKT1, AKT2, KLK3, AR, ARAF, BAD, CCND1, BCL2, BRAF, CASP9, CCNE1, CDK2, CDKN1A, CDKN1B, CHUK, CREB1, CTNNB1, E2F1, E2F3, EGF, EGFR, EP300, ERBB2, FGFR1, FGFR2, MTOR, GSK3B, GSTP1, HRAS, HSP90AA1, IGF1, IGF1R, IKBKB, KRAS, MDM2, NFKB1, NFKBIA, NRAS, PDGFA, PDPK1, PIK3CA, PIK3CB, PIK3CD, PIK3CG, MAPK1, MAPK3, MAP2K1, MAP2K2, PTEN, RAF1, RB1, RELA, TCF7L2, TGFA, TP53, HSP90B1, CREB3L4	6.52984815742059e-25
Adenocarcinoma	hsa05219	Bladder cancer	4.20353721709976e-26	ARAF, CCND1, BRAF, CDH1, CDK4, CDKN1A, CDKN2A, DAPK1, E2F1, E2F3, TYMP, EGF, EGFR, ERBB2, FGFR3, VEGFD, HRAS, CXCL8, KRAS, MDM2, MMP1, MMP2, MMP9, MYC, NRAS, PGF, MAPK1, MAPK3, MAP2K1, MAP2K2, RAF1, RB1, THBS1, TP53, VEGFA, VEGFC, RASSF1	1.28908474657726e-24
Adenocarcinoma	hsa05212	Pancreatic cancer	1.59508056111262e-24	AKT1, AKT2, ARAF, BAD, CCND1, BCL2L1, BRAF, BRCA2, CASP9, CDK4, CDK6, CDKN2A, CHUK, E2F1, E2F3, EGF, EGFR, ERBB2, VEGFD, IKBKB, KRAS, SMAD2, SMAD4, NFKB1, PGF, PIK3CA, PIK3CB, PIK3CD, PIK3CG, MAPK1, MAPK3, MAP2K1, RAC1, RAD51, RAF1, RB1, RELA, STAT1, STAT3, TGFA, TGFB1, TGFB2, TGFB3, TGFBR1, TGFBR2, TP53, VEGFA, VEGFC	3.66868529055903e-23
Adenocarcinoma	hsa05210	Colorectal cancer	1.54935478454586e-23	AKT1, AKT2, APC, BIRC5, ARAF, RHOA, BAD, BAX, CCND1, BCL2, BRAF, CASP3, CASP9, CTNNB1, DCC, FOS, GSK3B, MSH6, JUN, KRAS, SMAD2, SMAD4, MLH1, MSH2, MSH3, MYC, PIK3CA, PIK3CB, PIK3CD, PIK3CG, MAPK1, MAPK3, MAP2K1, RAC1, RAF1, TCF7L2, TGFB1, TGFB2, TGFB3, TGFBR1, TGFBR2, TP53, AXIN1, APC2	2.85081280356438e-22
Adenocarcinoma	hsa05220	Chronic myeloid leukemia	3.09973026207905e-22	ABL1, AKT1, AKT2, ARAF, BAD, CCND1, BCL2L1, BRAF, CBL, CDK4, CDK6, CDKN1A, CDKN1B, CDKN2A, CHUK, CRK, E2F1, E2F3, HRAS, IKBKB, KRAS, SMAD4, MDM2, MYC, NFKB1, NFKBIA, NRAS, PIK3CA, PIK3CB, PIK3CD, PIK3CG, MAPK1, MAPK3, MAP2K1, MAP2K2, PTPN11, RAF1, RB1, RELA, STAT5A, STAT5B, TGFB1, TGFB2, TGFB3, TGFBR1, TGFBR2, TP53	4.75291973518788e-21
Adenocarcinoma	hsa05222	Small cell lung cancer	5.39394908552017e-22	AKT1, AKT2, APAF1, BIRC3, XIAP, CCND1, BCL2, BCL2L1, CASP9, CCNE1, CDK2, CDK4, CDK6, CDKN1B, CDKN2B, CHUK, COL4A5, COL4A6, E2F1, E2F3, FHIT, FN1, IKBKB, ITGA6, ITGA2, ITGA3, ITGAV, ITGB1, LAMA3, LAMB1, LAMC2, MAX, MYC, NFKB1, NFKBIA, NOS2, PIK3CA, PIK3CB, PIK3CD, PIK3CG, PTEN, PTGS2, PTK2, RARB, RB1, RELA, SKP2, TP53, TRAF1, TRAF4, PIAS3	7.08919022668365e-21
Adenocarcinoma	hsa05213	Endometrial cancer	4.95946410421656e-20	AKT1, AKT2, APC, ARAF, BAD, CCND1, BRAF, CASP9, CDH1, CTNNB1, EGF, EGFR, ELK1, ERBB2, FOXO3, GSK3B, HRAS, ILK, KRAS, MLH1, MYC, NRAS, PDPK1, PIK3CA, PIK3CB, PIK3CD, PIK3CG, MAPK1, MAPK3, MAP2K1, MAP2K2, PTEN, RAF1, TCF7L2, TP53, AXIN1, APC2	5.70338371984904e-19
Adenocarcinoma	hsa05218	Melanoma	6.4198036721656e-20	AKT1, AKT2, ARAF, BAD, CCND1, BRAF, CDH1, CDK4, CDK6, CDKN1A, CDKN2A, E2F1, E2F3, EGF, EGFR, FGF1, FGF2, FGF3, FGF5, FGF7, FGF9, FGF13, FGFR1, HGF, HRAS, IGF1, IGF1R, KRAS, MDM2, MET, NRAS, PDGFA, PIK3CA, PIK3CB, PIK3CD, PIK3CG, MAPK1, MAPK3, MAP2K1, MAP2K2, PTEN, RAF1, RB1, TP53	6.5624659759915e-19
Adenocarcinoma	hsa04115	p53 signaling pathway	5.17395846734484e-18	APAF1, FAS, ATM, BAX, CCND1, BID, CASP3, CASP8, CASP9, CCND2, CCND3, CCNE1, CDK1, CDK2, CDK4, CDK6, CDKN1A, CDKN2A, CHEK1, SFN, IGF1, IGFBP3, CD82, MDM2, MDM4, SERPINE1, SERPINB5, PTEN, RRM2, THBS1, TP53, TP73, TSC2, TNFRSF10B, CCNB2, CHEK2, BBC3, RRM2B, COP1, ZMAT3, SESN2	4.76004178995725e-17
Adenocarcinoma	hsa05223	Non-small cell lung cancer	5.46355006559217e-17	AKT1, AKT2, ARAF, BAD, CCND1, BRAF, CASP9, CDK4, CDK6, CDKN2A, E2F1, E2F3, EGF, EGFR, ERBB2, FHIT, FOXO3, HRAS, KRAS, NRAS, PDPK1, PIK3CA, PIK3CB, PIK3CD, PIK3CG, MAPK1, MAPK3, MAP2K1, MAP2K2, RAF1, RARB, RB1, TGFA, TP53, RASSF1	4.56951460031345e-16
Adenocarcinoma	hsa04510	Focal adhesion	1.79224790981392e-16	ACTB, ACTN4, AKT1, AKT2, BIRC3, XIAP, RHOA, BAD, CCND1, BCL2, BRAF, CAV1, CCND2, CCND3, COL4A5, COL4A6, COL11A1, CRK, CTNNB1, EGF, EGFR, ELK1, ERBB2, VEGFD, FLT1, FLT4, FN1, FYN, GSK3B, HGF, HRAS, TNC, IBSP, IGF1, IGF1R, ILK, ITGA6, ITGA2, ITGA3, ITGA4, ITGAV, ITGB1, ITGB3, ITGB4, JUN, KDR, LAMA3, LAMB1, LAMC2, MET, PAK1, PDGFA, PDPK1, PGF, PIK3CA, PIK3CB, PIK3CD, PIK3CG, MAPK1, MAPK3, MAP2K1, PT…	1.37405673085734e-15
Adenocarcinoma	hsa05211	Renal cell carcinoma	1.4683741636342e-15	AKT1, AKT2, ARAF, BRAF, CRK, EP300, EPAS1, ETS1, VEGFD, HGF, HIF1A, HRAS, JUN, KRAS, MET, NRAS, PAK1, PGF, PIK3CA, PIK3CB, PIK3CD, PIK3CG, MAPK1, MAPK3, MAP2K1, MAP2K2, PTPN11, RAC1, RAF1, SLC2A1, TGFA, TGFB1, TGFB2, TGFB3, VEGFA, VEGFC, VHL, CUL2, FLCN	1.03915710041805e-14
Adenocarcinoma	hsa04012	ErbB signaling pathway	2.62278294296023e-15	ABL1, AKT1, AKT2, ARAF, AREG, BAD, BRAF, CBL, CDKN1A, CDKN1B, CRK, HBEGF, EGF, EGFR, ELK1, ERBB2, ERBB3, ERBB4, EREG, MTOR, GSK3B, NRG1, HRAS, JUN, KRAS, MYC, NRAS, PAK1, PIK3CA, PIK3CB, PIK3CD, PIK3CG, MAPK1, MAPK3, MAP2K1, MAP2K2, MAP2K7, PTK2, RAF1, MAP2K4, SRC, STAT5A, STAT5B, TGFA	1.72354307680244e-14
Adenocarcinoma	hsa05214	Glioma	3.10659709075965e-15	AKT1, AKT2, ARAF, CCND1, BRAF, CALM1, CALM2, CALM3, CDK4, CDK6, CDKN1A, CDKN2A, E2F1, E2F3, EGF, EGFR, MTOR, HRAS, IGF1, IGF1R, KRAS, MDM2, NRAS, PDGFA, PIK3CA, PIK3CB, PIK3CD, PIK3CG, MAPK1, MAPK3, MAP2K1, MAP2K2, PTEN, RAF1, RB1, TGFA, TP53	1.90537954899925e-14
Adenocarcinoma	hsa05221	Acute myeloid leukemia	5.15998307192648e-14	AKT1, AKT2, ARAF, BAD, CCND1, BRAF, CHUK, MTOR, HRAS, IKBKB, KIT, KRAS, MYC, NFKB1, NRAS, PIK3CA, PIK3CB, PIM1, PIK3CD, PIK3CG, PML, PPARD, MAPK1, MAPK3, MAP2K1, MAP2K2, RAF1, RARA, RELA, STAT3, STAT5A, STAT5B, TCF7L2	2.96699026635773e-13
Adenocarcinoma	hsa05142	Chagas disease (American trypanosomiasis)	6.93190080793831e-14	AKT1, AKT2, FAS, FASLG, CALR, CASP8, CD3E, CHUK, MAPK14, ACE, FOS, GNAS, IFNG, IKBKB, IL1B, IL2, IL6, CXCL8, IL10, JUN, SMAD2, NFKB1, NFKBIA, NOS2, SERPINE1, PIK3CA, PIK3CB, PIK3CD, PIK3CG, PPP2CB, MAPK1, MAPK3, RELA, CCL2, CCL3, CCL5, MAP2K4, TGFB1, TGFB2, TGFB3, TGFBR1, TGFBR2, TLR4, TNF, TNFRSF1A, FADD, CFLAR	3.75138161370779e-13
Adenocarcinoma	hsa04060	Cytokine-cytokine receptor interaction	2.73877354771379e-13	ACVR1B, AMHR2, FAS, FASLG, CXCR5, BMP2, BMP7, CD40, CD40LG, CCR5, CCR7, CSF1, CSF1R, CSF2, CX3CR1, EGF, EGFR, EPO, EPOR, VEGFD, FLT1, FLT4, GH1, CXCR3, HGF, IFNA1, IFNG, IL1A, IL1B, IL2, IL4, IL5, IL6, IL6ST, CXCL8, CXCR2, IL10, IL11, IL11RA, IL12RB2, IL13, IL15RA, IL18, INHBA, KDR, KIT, LEP, LTA, MET, KITLG, PDGFA, PRL, PRLR, CCL2, CCL3, CCL5, CCL16, CXCL5, CXCL12, TGFB1, TGFB2, TGFB3, TGFBR1, T…	1.39981759105371e-12
Adenocarcinoma	hsa04660	T cell receptor signaling pathway	1.79903840572936e-12	AKT1, AKT2, RHOA, CBL, CD3E, CD28, CD40LG, CDK4, CHUK, MAPK14, CSF2, CTLA4, FOS, FYN, GSK3B, HRAS, IFNG, IKBKB, IL2, IL4, IL5, IL10, JUN, KRAS, NFKB1, NFKBIA, NRAS, PAK1, PDCD1, PIK3CA, PIK3CB, PIK3CD, PIK3CG, MAPK1, MAPK3, MAP2K1, MAP2K2, MAP2K7, PTPRC, RAF1, RELA, TNF, VAV1, BCL10, GRAP2, LAT	8.71113333300532e-12
Adenocarcinoma	hsa05145	Toxoplasmosis	9.79681414728887e-12	AKT1, AKT2, ALOX5, BIRC3, XIAP, BAD, BCL2, BCL2L1, CASP3, CASP8, CASP9, CD40, CD40LG, CHUK, CCR5, MAPK14, HLA-DQA1, HLA-DQB1, HSPA8, IFNG, IKBKB, IL10, ITGA6, ITGB1, LAMA3, LAMB1, LAMC2, NFKB1, NFKBIA, NOS2, PIK3CA, PIK3CB, PIK3CD, PIK3CG, PLA2G2A, PLA2G4A, MAPK1, MAPK3, RELA, STAT1, STAT3, TGFB1, TGFB2, TGFB3, TLR4, TNF, TNFRSF1A, PLA2G10, SOCS1, PLA2G2D, PLA2G3	4.50653450775288e-11
Adenocarcinoma	hsa05216	Thyroid cancer	5.58699073111949e-11	CCND1, BRAF, CDH1, CTNNB1, HRAS, KRAS, MYC, NRAS, NTRK1, PPARG, MAPK1, MAPK3, MAP2K1, MAP2K2, RET, TCF7L2, TP53, TPM3, PAX8, CCDC6	2.44763403458568e-10
Adenocarcinoma	hsa04110	Cell cycle	1.41944089683802e-10	ABL1, ATM, CCND1, BUB1, BUB1B, CCNA2, CCND2, CCND3, CCNE1, CDK1, CDC25A, CDK2, CDK4, CDK6, CDKN1A, CDKN1B, CDKN1C, CDKN2A, CDKN2B, CHEK1, E2F1, E2F3, E2F4, EP300, SFN, GSK3B, MAD2L1, SMAD2, SMAD4, MCM2, MCM4, MCM5, MDM2, MYC, PCNA, PLK1, RB1, SKP2, TGFB1, TGFB2, TGFB3, TP53, SMC3, CCNB2, PTTG1, STAG2, CHEK2	5.93584375041355e-10
Adenocarcinoma	hsa04210	Apoptosis	2.95104736332205e-10	AKT1, AKT2, APAF1, BIRC3, XIAP, FAS, FASLG, ATM, BAD, BAX, BCL2, BCL2L1, BID, CASP3, CASP8, CASP9, CHUK, IKBKB, IL1A, IL1B, NFKB1, NFKBIA, NTRK1, PIK3CA, PIK3CB, PIK3CD, PIK3CG, RELA, TNF, TNFRSF1A, TP53, TNFSF10, FADD, TNFRSF10C, TNFRSF10B, TNFRSF10A, CFLAR	1.18041894532882e-09
Adenocarcinoma	hsa04722	Neurotrophin signaling pathway	3.67558041544593e-10	ABL1, AKT1, AKT2, FASLG, RHOA, BAD, BAX, BCL2, BDNF, BRAF, CALM1, CALM2, CALM3, CRK, MAPK14, FOXO3, GSK3B, HRAS, IKBKB, JUN, KRAS, MAP3K3, NFKB1, NFKBIA, NRAS, NTRK1, NTRK2, NTRK3, PIK3CA, PIK3CB, PIK3CD, PIK3CG, MAPK1, MAPK3, MAPK7, MAP2K1, MAP2K2, MAP2K5, MAP2K7, PSEN2, PTPN11, RAC1, RAF1, RELA, RPS6KA1, TP53, TP73	1.40897249258761e-09
Adenocarcinoma	hsa05160	Hepatitis C	8.65552689571414e-10	AKT1, AKT2, ARAF, BAD, BRAF, CDKN1A, CHUK, CLDN4, CLDN3, CLDN7, MAPK14, EGF, EGFR, GSK3B, HRAS, IFNA1, IKBKB, CXCL8, EIF3E, IRF1, KRAS, NFKB1, NFKBIA, NRAS, PIK3CA, PIK3CB, PIK3CD, PIK3CG, PPP2CB, MAPK1, MAPK3, RAF1, RELA, STAT1, STAT3, TLR3, CLDN5, TNF, TNFRSF1A, TP53, SOCS3, CLDN6, CLDN2, CLDN1, PIAS3, CLDN18, MAVS, OCLN	3.1852338976228e-09
Adenocarcinoma	hsa04620	Toll-like receptor signaling pathway	1.05821066103808e-09	AKT1, AKT2, CASP8, CD80, CD40, CHUK, MAPK14, CTSK, FOS, IFNA1, IKBKB, IL1B, IL6, CXCL8, JUN, NFKB1, NFKBIA, PIK3CA, PIK3CB, PIK3CD, PIK3CG, MAPK1, MAPK3, MAP2K1, MAP2K2, MAP2K7, RAC1, RELA, CCL3, CCL5, MAP2K4, SPP1, STAT1, TLR1, TLR3, TLR4, TNF, FADD, TLR7, TICAM2	3.74443772367322e-09
Adenocarcinoma	hsa05144	Malaria	1.15844106942159e-09	CD40, CD40LG, HGF, ICAM1, IFNG, IL1B, IL6, CXCL8, IL10, IL18, LRP1, MET, PECAM1, CCL2, SDC1, SELE, TGFB1, TGFB2, TGFB3, THBS1, THBS2, THBS4, TLR4, TNF, VCAM1, KLRK1	3.94728068099208e-09
Adenocarcinoma	hsa05323	Rheumatoid arthritis	1.37002711421173e-09	ANGPT1, CD28, CD80, CSF1, CSF2, CTLA4, CTSK, CTSL, FLT1, FOS, HLA-DQA1, HLA-DQB1, ICAM1, IFNG, IL1A, IL1B, IL6, CXCL8, IL11, IL18, JUN, MMP1, MMP3, PGF, CCL2, CCL3, CCL5, CXCL5, CXCL12, TGFB1, TGFB2, TGFB3, TLR4, TNF, VEGFA, TNFSF11, TNFSF13	4.5015176609814e-09
Adenocarcinoma	hsa04380	Osteoclast differentiation	1.73629906298057e-09	AKT1, AKT2, BTK, CHUK, CREB1, MAPK14, CSF1, CSF1R, CTSK, CYLD, FCGR3A, FCGR3B, FOS, FYN, IFNG, IKBKB, IL1A, IL1B, ITGB3, JUN, NFKB1, NFKBIA, PIK3CA, PIK3CB, PIK3CD, PIK3CG, PPARG, MAPK1, MAPK3, MAP2K1, MAP2K7, RAC1, RELA, STAT1, TGFB1, TGFB2, TGFBR1, TGFBR2, TNF, TNFRSF1A, FOSL1, TNFSF11, SOCS1, SQSTM1, SOCS3, NOX1	5.50825909635214e-09
Adenocarcinoma	hsa04370	VEGF signaling pathway	6.46396749899867e-09	AKT1, AKT2, BAD, CASP9, MAPK14, HRAS, HSPB1, KDR, KRAS, NOS3, NRAS, PIK3CA, PIK3CB, PIK3CD, PIK3CG, PLA2G2A, PLA2G4A, MAPK1, MAPK3, MAP2K1, MAP2K2, PTGS2, PTK2, PXN, RAC1, RAF1, SRC, VEGFA, PLA2G10, SPHK1, PLA2G2D, PLA2G3	1.98228336635959e-08
Adenocarcinoma	hsa04010	MAPK signaling pathway	8.84287808784959e-09	AKT1, AKT2, FAS, FASLG, ARRB2, BDNF, BRAF, CASP3, CHUK, CRK, MAPK14, DUSP1, DUSP6, EGF, EGFR, ELK1, FGF1, FGF2, FGF3, FGF5, FGF7, FGF9, FGF13, FGFR1, FGFR3, FGFR2, FGFR4, FOS, HRAS, HSPA8, HSPB1, IKBKB, IL1A, IL1B, JUN, KRAS, STMN1, MAX, MAP3K3, MYC, NF1, NFKB1, NRAS, NTRK1, NTRK2, PAK1, PDGFA, PLA2G2A, PLA2G4A, MAPK1, MAPK3, MAPK7, MAP2K1, MAP2K2, MAP2K5, MAP2K7, RAC1, RAF1, RELA, RPS6KA1, MAP2K…	2.62433801316827e-08
Adenocarcinoma	hsa04664	Fc epsilon RI signaling pathway	2.01271270098052e-08	AKT1, AKT2, BTK, MAPK14, CSF2, FYN, HRAS, IL4, IL5, IL13, KRAS, NRAS, PIK3CA, PIK3CB, PIK3CD, PIK3CG, PLA2G2A, PLA2G4A, MAPK1, MAPK3, MAP2K1, MAP2K2, MAP2K7, RAC1, RAF1, MAP2K4, TNF, VAV1, PLA2G10, PLA2G2D, LAT, PLA2G3	5.78654901531899e-08
Adenocarcinoma	hsa04150	mTOR signaling pathway	6.143639918612e-08	AKT1, AKT2, BRAF, EIF4E, VEGFD, MTOR, HIF1A, IGF1, PDPK1, PGF, PIK3CA, PIK3CB, PIK3CD, PIK3CG, MAPK1, MAPK3, RPS6KA1, STK11, TSC1, TSC2, VEGFA, VEGFC, STRADA, RICTOR	1.71277234094638e-07
Adenocarcinoma	hsa00480	Glutathione metabolism	1.2540934070343e-07	ANPEP, GGT1, GCLC, GCLM, GPX1, GPX2, GPX3, GSR, GSS, GSTA1, GSTM1, GSTM3, GSTM4, GSTP1, GSTT1, IDH1, IDH2, ODC1, RRM1, RRM2, RRM2B, GGCT, GSTK1	3.393429219034e-07
Adenocarcinoma	hsa04520	Adherens junction	1.54732392609811e-07	ACP1, ACTB, ACTN4, RHOA, CDH1, CSNK2A2, CTNNB1, CTNND1, EGFR, EP300, ERBB2, FGFR1, FYN, IGF1R, INSR, SMAD2, SMAD4, MET, MAPK1, MAPK3, NECTIN1, RAC1, SNAI2, SRC, TCF7L2, TGFBR1, TGFBR2, IQGAP1, NECTIN4	4.06725146288646e-07
Adenocarcinoma	hsa04514	Cell adhesion molecules (CAMs)	2.0437899743218e-07	CD28, CD80, CD34, CD40, CD40LG, CDH1, CDH2, CDH3, CNTN1, CLDN4, CLDN3, CLDN7, CTLA4, HLA-A, HLA-C, HLA-DQA1, HLA-DQB1, HLA-G, ICAM1, ITGA6, ITGA4, ITGAV, ITGB1, L1CAM, CD99, NCAM1, PDCD1, PECAM1, PTPRC, NECTIN1, SDC1, SELE, CLDN5, VCAM1, CLDN6, CLDN2, CLDN1, NRXN3, CADM1, CD274, CLDN18, PDCD1LG2, OCLN	5.22301882326681e-07
Adenocarcinoma	hsa05140	Leishmaniasis	4.28492532628192e-07	MAPK14, ELK1, FCGR3A, FCGR3B, FOS, HLA-DQA1, HLA-DQB1, IFNG, IL1A, IL1B, IL4, IL10, ITGA4, ITGB1, JUN, NFKB1, NFKBIA, NOS2, MAPK1, MAPK3, PTGS2, RELA, STAT1, TGFB1, TGFB2, TGFB3, TLR4, TNF	1.06544089194037e-06
Adenocarcinoma	hsa04670	Leukocyte transendothelial migration	7.24467155606856e-07	ACTB, ACTN4, RHOA, CLDN4, CLDN3, CLDN7, MAPK14, CTNNB1, CTNND1, PTK2B, ICAM1, ITGA4, ITGB1, CD99, MMP2, MMP9, MSN, PECAM1, PIK3CA, PIK3CB, PIK3CD, PIK3CG, PTK2, PTPN11, PXN, RAC1, CXCL12, CLDN5, VAV1, VCAM1, CXCR4, CLDN6, CLDN2, CLDN1, BCAR1, NOX1, CLDN18, OCLN	1.75397311357449e-06
Adenocarcinoma	hsa04630	Jak-STAT signaling pathway	1.24328731720165e-06	AKT1, AKT2, CCND1, BCL2L1, CBL, CCND2, CCND3, CSF2, EP300, EPO, EPOR, GH1, IFNA1, IFNG, IL2, IL4, IL5, IL6, IL6ST, IL10, IL11, IL11RA, IL12RB2, IL13, IL15RA, LEP, MYC, PIK3CA, PIK3CB, PIM1, PIK3CD, PIK3CG, PRL, PRLR, PTPN11, STAT1, STAT3, STAT5A, STAT5B, STAT6, SOCS1, SOCS3, OSMR, PIAS3, IL24, IL22	2.93288290211672e-06
Adenocarcinoma	hsa04350	TGF-beta signaling pathway	1.41924963064879e-06	AMHR2, RHOA, BMP2, BMP4, BMP7, CDKN2B, E2F4, EP300, ID1, ID3, ID4, IFNG, INHBA, SMAD1, SMAD2, SMAD4, MYC, PPP2CB, MAPK1, MAPK3, SP1, TGFB1, TGFB2, TGFB3, TGFBR1, TGFBR2, THBS1, THBS2, THBS4, TNF	3.26427415049221e-06
Adenocarcinoma	hsa04621	NOD-like receptor signaling pathway	3.11551757677501e-06	BIRC3, XIAP, CASP8, CHUK, MAPK14, HSP90AA1, IKBKB, IL1B, IL6, CXCL8, IL18, NAIP, NFKB1, NFKBIA, MAPK1, MAPK3, RELA, CCL2, CCL5, TNF, HSP90B1, PYCARD, NLRP3	6.9909174893488e-06
Adenocarcinoma	hsa04662	B cell receptor signaling pathway	3.999945992664e-06	AKT1, AKT2, BTK, CHUK, FOS, GSK3B, HRAS, IKBKB, JUN, KRAS, NFKB1, NFKBIA, NRAS, PIK3CA, PIK3CB, PIK3CD, PIK3CG, MAPK1, MAPK3, MAP2K1, MAP2K2, RAC1, RAF1, RELA, VAV1, IFITM1, BCL10	8.76178646012114e-06
Adenocarcinoma	hsa05146	Amoebiasis	4.734458532456e-06	ACTN4, CASP3, COL4A5, COL4A6, COL11A1, CSF2, FN1, GNAS, HSPB1, IFNG, IL1B, IL6, CXCL8, IL10, LAMA3, LAMB1, LAMC2, MUC2, NFKB1, NOS2, SERPINB2, PIK3CA, PIK3CB, PIK3CD, PIK3CG, PTK2, RELA, SERPINB3, SERPINB4, TGFB1, TGFB2, TGFB3, TLR4, TNF	1.01295391857198e-05
Adenocarcinoma	hsa05330	Allograft rejection	5.76987021078597e-06	FAS, FASLG, CD28, CD80, CD40, CD40LG, HLA-A, HLA-C, HLA-DQA1, HLA-DQB1, HLA-G, IFNG, IL2, IL4, IL5, IL10, TNF	1.20642740770979e-05
Adenocarcinoma	hsa04810	Regulation of actin cytoskeleton	6.21818460276172e-06	ACTB, ACTN4, APC, ARAF, RHOA, BRAF, CFL1, CRK, EGF, EGFR, FGF1, FGF2, FGF3, FGF5, FGF7, FGF9, FGF13, FGFR1, FGFR3, FGFR2, FGFR4, FN1, GSN, HRAS, ITGA6, ITGA2, ITGA3, ITGA4, ITGAV, ITGB1, ITGB3, ITGB4, KRAS, MSN, MYH9, NRAS, PAK1, PDGFA, PFN1, PIK3CA, PIK3CB, PIK3CD, PIK3CG, MAPK1, MAPK3, MAP2K1, MAP2K2, PTK2, PXN, RAC1, RAF1, VAV1, IQGAP1, ARHGEF1, BCAR1, APC2	1.27127329656462e-05
Adenocarcinoma	hsa04650	Natural killer cell mediated cytotoxicity	7.86086710184348e-06	FAS, FASLG, ARAF, BID, BRAF, CASP3, CSF2, PTK2B, FCGR3A, FCGR3B, FYN, HLA-A, HLA-C, HLA-G, HRAS, ICAM1, IFNA1, IFNG, KRAS, NRAS, PAK1, PIK3CA, PIK3CB, PIK3CD, PIK3CG, MAPK1, MAPK3, MAP2K1, MAP2K2, PTPN11, RAC1, RAF1, TNF, VAV1, TNFSF10, TNFRSF10C, TNFRSF10B, TNFRSF10A, KLRK1, LAT	1.5721734203687e-05
Adenocarcinoma	hsa05020	Prion diseases	1.18109973861667e-05	BAX, EGR1, ELK1, FYN, HSPA5, IL1A, IL1B, IL6, NCAM1, NOTCH1, MAPK1, MAPK3, MAP2K1, MAP2K2, CCL5, SOD1	2.31193991388795e-05
Adenocarcinoma	hsa04062	Chemokine signaling pathway	1.63432255607223e-05	AKT1, AKT2, RHOA, ARRB2, CXCR5, BRAF, CHUK, CCR5, CCR7, CRK, CX3CR1, PTK2B, FOXO3, CXCR3, GSK3B, HRAS, IKBKB, CXCL8, CXCR2, KRAS, NFKB1, NFKBIA, NRAS, PAK1, PIK3CA, PIK3CB, PIK3CD, PIK3CG, PRKCZ, MAPK1, MAPK3, MAP2K1, PTK2, PXN, RAC1, RAF1, RELA, CCL2, CCL3, CCL5, CCL16, CXCL5, CXCL12, STAT1, STAT3, STAT5B, VAV1, CXCR4, CXCL14, BCAR1	3.1324515658051e-05
Adenocarcinoma	hsa04672	Intestinal immune network for IgA production	2.31845296185669e-05	CD28, CD80, CD40, CD40LG, HLA-DQA1, HLA-DQB1, IL2, IL4, IL5, IL6, IL10, IL15RA, ITGA4, PIGR, CXCL12, TGFB1, CXCR4, TNFSF13, AICDA	4.35301372430236e-05
Adenocarcinoma	hsa04914	Progesterone-mediated oocyte maturation	2.38400087692539e-05	AKT1, AKT2, ARAF, BRAF, BUB1, CCNA2, CDK1, CDC25A, CDK2, MAPK14, HSP90AA1, IGF1, IGF1R, KRAS, MAD2L1, PGR, PIK3CA, PIK3CB, PIK3CD, PIK3CG, PLK1, MAPK1, MAPK3, MAP2K1, RAF1, RPS6KA1, CCNB2, CPEB1	4.38656161354271e-05
Adenocarcinoma	hsa04912	GnRH signaling pathway	3.30412230878135e-05	CALM1, CALM2, CALM3, MAPK14, HBEGF, EGFR, ELK1, PTK2B, GNAS, HRAS, JUN, KRAS, MAP3K3, MMP2, MMP14, NRAS, PLA2G2A, PLA2G4A, MAPK1, MAPK3, MAPK7, MAP2K1, MAP2K2, MAP2K7, RAF1, MAP2K4, SRC, PLA2G10, MAP3K2, PLA2G2D, PLA2G3	5.96037749819381e-05
Adenocarcinoma	hsa05416	Viral myocarditis	3.49430936303247e-05	ABL1, ACTB, CCND1, BID, CASP3, CASP8, CASP9, CAV1, CD28, CD80, CD40, CD40LG, CXADR, DAG1, FYN, HLA-A, HLA-C, HLA-DQA1, HLA-DQB1, HLA-G, ICAM1, MYH9, RAC1, SGCG	6.18223964228821e-05
Adenocarcinoma	hsa04640	Hematopoietic cell lineage	3.82989588567019e-05	ANPEP, CD3E, CD9, CD34, CD44, CD59, CSF1, CSF1R, CSF2, EPO, EPOR, IL1A, IL1B, IL4, IL5, IL6, IL11, IL11RA, ITGA6, ITGA2, ITGA3, ITGA4, ITGB3, KIT, KITLG, MME, TNF, CD24	6.64812116003127e-05
Adenocarcinoma	hsa00590	Arachidonic acid metabolism	5.71860928034253e-05	ALOX5, ALOX15, ALOX15B, CYP2E1, GGT1, GPX1, GPX2, GPX3, LTA4H, PLA2G2A, PLA2G4A, PTGIS, PTGS1, PTGS2, PLA2G10, AKR1C3, PTGES, PLA2G2D, HPGDS, PLA2G3, PTGES2	9.74281581095395e-05
Adenocarcinoma	hsa05217	Basal cell carcinoma	6.0320290389369e-05	APC, BMP2, BMP4, CTNNB1, DVL1, DVL3, GLI1, GLI3, GSK3B, PTCH1, SHH, SMO, TCF7L2, TP53, WNT5A, WNT8B, WNT11, AXIN1, APC2, HHIP	0.000100899394833126
Adenocarcinoma	hsa04920	Adipocytokine signaling pathway	6.4634397855111e-05	AKT1, AKT2, CHUK, ACSL4, MTOR, IKBKB, LEP, NFKB1, NFKBIA, PTPN11, RELA, SLC2A1, SLC2A4, STAT3, STK11, TNF, TNFRSF1A, TNFRSF1B, SOCS3, ADIPOQ, ADIPOR1, ACSL5, ADIPOR2	0.00010618508219054
Adenocarcinoma	hsa05014	Amyotrophic lateral sclerosis (ALS)	0.000114755252831388	APAF1, BAD, BAX, BCL2, BCL2L1, BID, CASP3, CASP9, CAT, MAPK14, GPX1, GRIA2, NOS1, RAC1, SOD1, TNF, TNFRSF1A, TNFRSF1B, TP53	0.00018521900456996
Adenocarcinoma	hsa04910	Insulin signaling pathway	0.000152004538477954	AKT1, AKT2, ARAF, BAD, BRAF, CALM1, CALM2, CALM3, CBL, CRK, EIF4E, ELK1, FASN, MTOR, GSK3B, HRAS, IKBKB, INSR, KRAS, NRAS, PDPK1, PIK3CA, PIK3CB, PIK3CD, PIK3CG, PRKCZ, MAPK1, MAPK3, MAP2K1, MAP2K2, PYGB, RAF1, SLC2A4, TSC1, TSC2, SOCS1, SOCS3	0.000241110647240893
Adenocarcinoma	hsa04940	Type I diabetes mellitus	0.000240453150849409	FAS, FASLG, CD28, CD80, HLA-A, HLA-C, HLA-DQA1, HLA-DQB1, HLA-G, HSPD1, IFNG, IL1A, IL1B, IL2, LTA, TNF	0.000374943896239756
Adenocarcinoma	hsa04320	Dorso-ventral axis formation	0.000275502479053424	EGFR, ETS1, ETS2, KRAS, NOTCH1, NOTCH2, NOTCH3, MAPK1, MAPK3, MAP2K1, CPEB1	0.000422437134548584
Adenocarcinoma	hsa05320	Autoimmune thyroid disease	0.000286959223259567	FAS, FASLG, CD28, CD80, CD40, CD40LG, CTLA4, HLA-A, HLA-C, HLA-DQA1, HLA-DQB1, HLA-G, IFNA1, IL2, IL4, IL5, IL10, TG	0.000432790959670166
Adenocarcinoma	hsa04930	Type II diabetes mellitus	0.000308495961959696	MTOR, IKBKB, INSR, PDX1, PIK3CA, PIK3CB, PIK3CD, PIK3CG, PKM, PRKCZ, MAPK1, MAPK3, SLC2A4, TNF, SOCS1, SOCS3, ADIPOQ	0.000446604658363045
Adenocarcinoma	hsa05100	Bacterial invasion of epithelial cells	0.000310681501469944	ACTB, RHOA, CAV1, CBL, CDH1, CRK, CTNNB1, CTTN, FN1, ILK, ITGB1, MET, PIK3CA, PIK3CB, PIK3CD, PIK3CG, PTK2, PXN, RAC1, SRC, BCAR1, DNM1L	0.000446604658363045
Adenocarcinoma	hsa04730	Long-term depression	0.000310681501469944	ARAF, BRAF, CRHR1, GNAS, GRIA2, HRAS, IGF1, IGF1R, KRAS, NOS1, NRAS, PLA2G2A, PLA2G4A, PPP2CB, MAPK1, MAPK3, MAP2K1, MAP2K2, RAF1, PLA2G10, PLA2G2D, PLA2G3	0.000446604658363045
Adenocarcinoma	hsa04512	ECM-receptor interaction	0.000392166610072011	CD44, COL4A5, COL4A6, COL11A1, DAG1, FN1, TNC, IBSP, ITGA6, ITGA2, ITGA3, ITGA4, ITGAV, ITGB1, ITGB3, ITGB4, LAMA3, LAMB1, LAMC2, SDC1, SPP1, THBS1, THBS2, THBS4, VTN	0.000555066586563462
Adenocarcinoma	hsa05332	Graft-versus-host disease	0.00046344273125062	FAS, FASLG, CD28, CD80, HLA-A, HLA-C, HLA-DQA1, HLA-DQB1, HLA-G, IFNG, IL1A, IL1B, IL2, IL6, TNF	0.000646011079925107
Adenocarcinoma	hsa04360	Axon guidance	0.000846625270977304	ABL1, RHOA, CFL1, DCC, EFNA1, EFNB1, EPHA2, EPHA1, EPHA3, EPHA4, EPHA8, EPHB2, FYN, GSK3B, HRAS, ITGB1, KRAS, L1CAM, MET, NRAS, PAK1, PLXNB1, MAPK1, MAPK3, PTK2, RAC1, ROBO1, CXCL12, CXCR4, SEMA3B, NRP1, SLIT2, SEMA4A	0.00116253022283451
Adenocarcinoma	hsa05143	African trypanosomiasis	0.00093311983757274	APOA1, FAS, FASLG, F2RL1, ICAM1, IFNG, IL1B, IL6, IL10, IL18, SELE, TNF, VCAM1	0.00126245625083371
Adenocarcinoma	hsa00232	Caffeine metabolism	0.00113940968691676	NAT1, NAT2, CYP1A2, CYP2A6, CYP2A13	0.00151921291588901
Adenocarcinoma	hsa04916	Melanogenesis	0.00120733775421702	CALM1, CALM2, CALM3, CREB1, CTNNB1, DVL1, DVL3, EDNRB, EP300, GNAS, GSK3B, HRAS, KIT, KRAS, KITLG, NRAS, MAPK1, MAPK3, MAP2K1, MAP2K2, RAF1, TCF7L2, TYRP1, WNT5A, WNT8B, WNT11, CREB3L4	0.00158678676268523
Adenocarcinoma	hsa04310	Wnt signaling pathway	0.00174693024034168	APC, RHOA, CCND1, CCND2, CCND3, CSNK2A2, CTNNB1, DVL1, DVL3, EP300, GSK3B, JUN, SMAD2, SMAD4, MMP7, MYC, PPARD, PPP2CB, RAC1, SFRP1, SFRP2, SFRP4, SFRP5, TCF7L2, TP53, WNT5A, WNT8B, WNT11, FOSL1, AXIN1, FRAT1, APC2, WIF1, DKK1, CTNNBIP1, VANGL1	0.00226362791706246
Adenocarcinoma	hsa04144	Endocytosis	0.00227588119061377	ADRB2, AP2A1, RHOA, ARRB2, CAV1, CBL, CCR5, CSF1R, EGF, EGFR, ERBB3, ERBB4, FGFR3, FGFR2, FGFR4, FLT1, FOLR1, FOLR2, HLA-A, HLA-C, HLA-G, HRAS, HSPA8, IGF1R, CXCR2, KDR, KIT, SMAD2, MDM2, MET, NTRK1, PML, PRKCZ, RET, SRC, TGFB1, TGFB2, TGFB3, TGFBR1, TGFBR2, CXCR4, IQSEC1, DNM1L, SH3GLB1, VTA1	0.0029080704102287
Adenocarcinoma	hsa05131	Shigellosis	0.00238090708758282	ABL1, ACTB, CD44, CHUK, CRK, MAPK14, CTTN, IKBKB, CXCL8, ITGB1, NFKB1, NFKBIA, PFN1, MAPK1, MAPK3, RAC1, RELA, U2AF1	0.00300059523366601
Adenocarcinoma	hsa05120	Epithelial cell signaling in Helicobacter pylori infection	0.00361918375912559	CASP3, CHUK, MAPK14, HBEGF, EGFR, IKBKB, CXCL8, CXCR2, JUN, MET, NFKB1, NFKBIA, PAK1, PTPN11, RAC1, RELA, CCL5, MAP2K4, SRC	0.00449952575458857
Adenocarcinoma	hsa04960	Aldosterone-regulated sodium reabsorption	0.00594958855065047	SFN, HSD11B1, IGF1, INSR, KRAS, PDPK1, PIK3CA, PIK3CB, PIK3CD, PIK3CG, MAPK1, MAPK3, SLC9A3R2	0.00729816195546457
Adenocarcinoma	hsa04614	Renin-angiotensin system	0.00761630926315342	AGT, AGTR1, ANPEP, CMA1, ACE, LNPEP, MME	0.00921974279223835
Adenocarcinoma	hsa05410	Hypertrophic cardiomyopathy (HCM)	0.00805416558260205	ACTB, DAG1, ACE, IGF1, IL6, ITGA6, ITGA2, ITGA3, ITGA4, ITGAV, ITGB1, ITGB3, ITGB4, LMNA, SGCG, TGFB1, TGFB2, TGFB3, TNF, TNNC1, TPM3	0.00962315887791413
Adenocarcinoma	hsa00591	Linoleic acid metabolism	0.00865529540561184	ALOX15, CYP1A2, CYP2E1, CYP3A4, PLA2G2A, PLA2G4A, PLA2G10, PLA2G2D, PLA2G3, AKR1B10	0.0100678190123597
Adenocarcinoma	hsa05310	Asthma	0.00865529540561184	CD40, CD40LG, HLA-DQA1, HLA-DQB1, IL4, IL5, IL10, IL13, RNASE3, TNF	0.0100678190123597
Adenocarcinoma	hsa04666	Fc gamma R-mediated phagocytosis	0.00875462522813889	AKT1, AKT2, CFL1, CRK, FCGR3A, GSN, MARCKS, PAK1, PIK3CA, PIK3CB, PIK3CD, PIK3CG, PLA2G4A, MAPK1, MAPK3, MAP2K1, PTPRC, RAC1, RAF1, VAV1, SPHK1, DNM1L, LAT	0.0100678190123597
Adenocarcinoma	hsa05412	Arrhythmogenic right ventricular cardiomyopathy (ARVC)	0.0096984047768036	ACTB, ACTN4, CDH2, CTNNB1, DAG1, DSC2, DSP, GJA1, ITGA6, ITGA2, ITGA3, ITGA4, ITGAV, ITGB1, ITGB3, ITGB4, LMNA, SGCG, TCF7L2	0.011015472092172
Adenocarcinoma	hsa00980	Metabolism of xenobiotics by cytochrome P450	0.0132963809212981	ADH1C, ADH5, ALDH1A3, CYP1A1, CYP1A2, CYP1B1, CYP2E1, CYP3A4, AKR1C2, GSTA1, GSTM1, GSTM3, GSTM4, GSTP1, GSTT1, UGT2B17, AKR1C3, GSTK1	0.0149178907897491
Adenocarcinoma	hsa05130	Pathogenic Escherichia coli infection	0.0137980159548595	ABL1, ACTB, RHOA, CDH1, CTNNB1, CTTN, FYN, ITGB1, KRT18, NCL, TLR4, CLDN1, ARHGEF2, TUBB3, OCLN	0.0152941863596033
Adenocarcinoma	hsa04530	Tight junction	0.0283496374757286	ACTB, ACTN4, AKT1, AKT2, RHOA, CDK4, CLDN4, CLDN3, CLDN7, CSNK2A2, CTNNB1, CTTN, HRAS, KRAS, MYH9, NRAS, PPP2CB, PRKCZ, PTEN, SRC, CLDN5, CLDN6, CLDN2, CLDN1, EPB41L3, CLDN18, MAGI3, OCLN	0.0310496029496075
Adenocarcinoma	hsa04623	Cytosolic DNA-sensing pathway	0.0304251684652779	CHUK, IFNA1, IKBKB, IL1B, IL6, IL18, NFKB1, NFKBIA, RELA, CCL5, RIPK3, PYCARD, MAVS, IL33	0.032547854637274
Adenocarcinoma	hsa00140	Steroid hormone biosynthesis	0.0304251684652779	STS, COMT, CYP1A1, CYP1B1, CYP3A4, CYP11B2, CYP17A1, CYP19A1, AKR1C2, HSD11B1, HSD17B1, UGT2B17, AKR1C3, CYP7B1	0.032547854637274
Adenocarcinoma	hsa00270	Cysteine and methionine metabolism	0.0320112153624661	DNMT1, DNMT3B, GOT2, LDHA, LDHB, MAT2A, MTAP, MTR, AHCYL1, SDS	0.0338509403832975
Adenocarcinoma	hsa00982	Drug metabolism - cytochrome P450	0.0350511484248166	ADH1C, ADH5, ALDH1A3, CYP1A2, CYP2A6, CYP2A13, CYP2D6, CYP2E1, CYP3A4, GSTA1, GSTM1, GSTM3, GSTM4, GSTP1, GSTT1, UGT2B17, GSTK1	0.0366443824441264
Adenocarcinoma	hsa05414	Dilated cardiomyopathy	0.0374612179513424	ACTB, DAG1, GNAS, IGF1, ITGA6, ITGA2, ITGA3, ITGA4, ITGAV, ITGB1, ITGB3, ITGB4, LMNA, SGCG, TGFB1, TGFB2, TGFB3, TNF, TNNC1, TPM3	0.0382936894613722
Adenocarcinoma	hsa04540	Gap junction	0.0374612179513424	CDK1, LPAR1, EGF, EGFR, GJA1, GNAS, HRAS, KRAS, NRAS, PDGFA, MAPK1, MAPK3, MAPK7, MAP2K1, MAP2K2, MAP2K5, RAF1, SRC, TUBB3, MAP3K2	0.0382936894613722
Adenocarcinoma	hsa04720	Long-term potentiation	0.0467559617073426	ARAF, BRAF, CALM1, CALM2, CALM3, EP300, GRIA2, HRAS, KRAS, NRAS, MAPK1, MAPK3, MAP2K1, MAP2K2, RAF1, RPS6KA1	0.0472697634843464
Adenocarcinoma	hsa04612	Antigen processing and presentation	0.0495158250493069	CALR, CREB1, CTSB, CTSL, PDIA3, HLA-A, HLA-C, HLA-DQA1, HLA-DQB1, HLA-G, HSPA5, HSPA8, HSP90AA1, IFNG, NFYA, PSME2, TNF	0.0495158250493069
Down Syndrome	hsa04060	Cytokine-cytokine receptor interaction	1.44036444603532e-10	ACVR1, CCR5, FLT1, FLT3, GH1, GHR, IFNA1, IFNA13, IFNAR2, IFNG, IL1A, IL1B, IL2RA, IL4, IL6, IL7, CXCL8, IL10, IL10RB, IL15, KIT, LEP, LTBR, CXCL9, MPL, PDGFB, PRL, CCL2, TGFB1, TNF, TNFRSF1A, TPO, VEGFA, TNFSF10, TNFRSF10C, CRLF2, CCR2	7.34585867478014e-09
Down Syndrome	hsa04630	Jak-STAT signaling pathway	9.23237963748971e-09	CCND1, GH1, GHR, IFNA1, IFNA13, IFNAR2, IFNG, IL2RA, IL4, IL6, IL7, IL10, IL10RB, IL15, JAK2, JAK3, LEP, MPL, PIK3CD, PRL, PTPN11, STAT1, STAT3, TPO, CRLF2	2.35425680755988e-07
Down Syndrome	hsa05200	Pathways in cancer	4.88280859913578e-08	ABL1, CCND1, BCL2, CASP3, RUNX1, CDKN1A, CDKN1B, E2F1, EPAS1, ERBB2, FLT3, FN1, MTOR, IL6, CXCL8, ITGA2B, KIT, NOS2, PDGFB, PGF, PIK3CD, PML, MAPK10, PTCH1, PTGS2, RELA, RET, SHH, STAT1, STAT3, TGFB1, TP53, HSP90B1, VEGFA, PAX8, RASSF1, APPL1	8.30077461853083e-07
Down Syndrome	hsa04640	Hematopoietic cell lineage	9.2402493716999e-07	CD19, CD34, CD59, FLT3, GYPA, IL1A, IL1B, IL2RA, IL4, IL6, IL7, ITGA2B, ITGAM, KIT, TNF, TPO	1.17813179489174e-05
Down Syndrome	hsa05144	Malaria	1.27381980474075e-06	GYPA, GYPB, IFNG, IL1B, IL6, CXCL8, IL10, ITGAL, ITGB2, CCL2, TGFB1, TNF	1.29929620083556e-05
Down Syndrome	hsa05140	Leishmaniasis	1.95249464913988e-06	IFNG, IL1A, IL1B, IL4, IL10, ITGAM, ITGB2, JAK2, NOS2, PTGS2, RELA, STAT1, TGFB1, TNF	1.6596204517689e-05
Down Syndrome	hsa04650	Natural killer cell mediated cytotoxicity	5.61253382916773e-06	CASP3, CD247, FYN, HLA-A, HLA-B, IFNA1, IFNA13, IFNAR2, IFNG, ITGAL, ITGB2, NFATC1, NFATC2, PAK1, PIK3CD, PTPN11, TNF, TNFSF10, TNFRSF10C	4.08913178982221e-05
Down Syndrome	hsa05146	Amoebiasis	1.1595122593644e-05	C9, CASP3, FN1, IFNG, IL1B, IL6, CXCL8, IL10, ITGAM, ITGB2, NOS2, PIK3CD, RAB5A, RELA, TGFB1, TNF	6.67834838443708e-05
Down Syndrome	hsa05020	Prion diseases	1.29309328789831e-05	C9, FYN, IL1A, IL1B, IL6, NCAM1, PRNP, SOD1, STIP1	6.67834838443708e-05
Down Syndrome	hsa05014	Amyotrophic lateral sclerosis (ALS)	1.30948007537982e-05	BCL2, CASP3, CAT, NEFH, NEFL, RAB5A, SOD1, TNF, TNFRSF1A, TP53, DERL1	6.67834838443708e-05
Down Syndrome	hsa04722	Neurotrophin signaling pathway	3.1262509245641e-05	ABL1, BCL2, BDNF, CALM1, CALM2, CALM3, NGF, NTF3, PIK3CD, MAPK10, PSEN1, PSEN2, PTPN11, RELA, TP53, TP73, YWHAG	0.000135973222859749
Down Syndrome	hsa05323	Rheumatoid arthritis	3.3143983322492e-05	FLT1, IFNG, IL1A, IL1B, IL6, CXCL8, IL15, ITGAL, ITGB2, PGF, CCL2, TGFB1, TNF, VEGFA	0.000135973222859749
Down Syndrome	hsa04380	Osteoclast differentiation	3.46598411211126e-05	CREB1, FYN, IFNAR2, IFNG, IL1A, IL1B, NFATC1, NFATC2, PIK3CD, MAPK10, RELA, STAT1, TGFB1, TNF, TNFRSF1A, SQSTM1, MAP3K14	0.000135973222859749
Down Syndrome	hsa05142	Chagas disease (American trypanosomiasis)	3.80268380409177e-05	CD247, IFNG, IL1B, IL6, CXCL8, IL10, NOS2, PIK3CD, PPP2CA, MAPK10, RELA, CCL2, TGFB1, TNF, TNFRSF1A	0.000138359820083597
Down Syndrome	hsa05212	Pancreatic cancer	4.06940647304697e-05	CCND1, E2F1, ERBB2, PGF, PIK3CD, MAPK10, RELA, STAT1, STAT3, TGFB1, TP53, VEGFA	0.000138359820083597
Down Syndrome	hsa05145	Toxoplasmosis	5.17579350070239e-05	BCL2, CASP3, CCR5, IFNG, IL10, IL10RB, JAK2, NOS2, PIK3CD, MAPK10, RELA, STAT1, STAT3, TGFB1, TNF, TNFRSF1A, PLA2G2D	0.000164978417834889
Down Syndrome	hsa05219	Bladder cancer	6.24343428550511e-05	CCND1, CDKN1A, E2F1, ERBB2, CXCL8, PGF, TP53, VEGFA, RASSF1	0.000185121925745909
Down Syndrome	hsa05320	Autoimmune thyroid disease	6.53371502632621e-05	CGA, HLA-A, HLA-B, IFNA1, IFNA13, IL4, IL10, TG, TPO, TSHR	0.000185121925745909
Down Syndrome	hsa04210	Apoptosis	8.66518674194515e-05	BCL2, CASP3, IL1A, IL1B, NGF, PIK3CD, RELA, TNF, TNFRSF1A, TP53, TNFSF10, TNFRSF10C, MAP3K14	0.000232591854652212
Down Syndrome	hsa05215	Prostate cancer	0.000110125765269457	CCND1, BCL2, CDKN1A, CDKN1B, CREB1, E2F1, ERBB2, MTOR, PDGFB, PIK3CD, RELA, TP53, HSP90B1	0.000280820701437116
Down Syndrome	hsa05220	Chronic myeloid leukemia	0.000281670924615513	ABL1, CCND1, RUNX1, CDKN1A, CDKN1B, E2F1, PIK3CD, PTPN11, RELA, TGFB1, TP53	0.000684057959780532
Down Syndrome	hsa05010	Alzheimer's disease	0.000318061630775979	APOE, APP, CALM1, CALM2, CALM3, CASP3, GAPDH, HSD17B10, IL1B, MAPT, NDUFS3, PSEN1, PSEN2, TNF, TNFRSF1A, NAE1, BACE1, BACE2	0.000737324689526133
Down Syndrome	hsa05214	Glioma	0.000448317409350449	CCND1, CALM1, CALM2, CALM3, CDKN1A, E2F1, MTOR, PDGFB, PIK3CD, TP53	0.00095786858211127
Down Syndrome	hsa04940	Type I diabetes mellitus	0.000450761685699421	CPE, HLA-A, HLA-B, HSPD1, IFNG, IL1A, IL1B, TNF	0.00095786858211127
Down Syndrome	hsa04920	Adipocytokine signaling pathway	0.000648949557170355	CPT1B, MTOR, JAK2, LEP, MAPK10, PTPN11, RELA, STAT3, TNF, TNFRSF1A	0.00131989009192818
Down Syndrome	hsa05160	Hepatitis C	0.000672885144904564	CDKN1A, IFNA1, IFNA13, IFNAR2, CXCL8, IRF1, PIK3CD, PPP2CA, MAPK10, RELA, STAT1, STAT3, TNF, TNFRSF1A, TP53	0.00131989009192818
Down Syndrome	hsa05221	Acute myeloid leukemia	0.000710264824718423	CCND1, RUNX1, FLT3, MTOR, KIT, PIK3CD, PML, RELA, STAT3	0.00134161133557924
Down Syndrome	hsa04621	NOD-like receptor signaling pathway	0.000809307637114568	IL1B, IL6, CXCL8, MAPK10, RELA, CCL2, TNF, HSP90B1, NOD2	0.00143292749507184
Down Syndrome	hsa00670	One carbon pool by folate	0.000814801908962421	GART, MTHFR, MTR, TYMS, MTHFD1L	0.00143292749507184
Down Syndrome	hsa04510	Focal adhesion	0.00106247101089662	ACTB, CCND1, BCL2, COL6A1, COL6A2, COL6A3, ERBB2, FLNA, FLT1, FN1, FYN, ITGA2B, PAK1, PDGFB, PGF, PIK3CD, MAPK10, RELN, VEGFA	0.00174847004436489
Down Syndrome	hsa05222	Small cell lung cancer	0.00106279551716297	CCND1, BCL2, CDKN1B, E2F1, FN1, ITGA2B, NOS2, PIK3CD, PTGS2, RELA, TP53	0.00174847004436489
Down Syndrome	hsa04620	Toll-like receptor signaling pathway	0.00149267699748535	IFNA1, IFNA13, IFNAR2, IL1B, IL6, CXCL8, CXCL9, PIK3CD, MAPK10, RELA, STAT1, TNF	0.00237895396474228
Down Syndrome	hsa05332	Graft-versus-host disease	0.00174075224104757	HLA-A, HLA-B, IFNG, IL1A, IL1B, IL6, TNF	0.00269025346343716
Down Syndrome	hsa04660	T cell receptor signaling pathway	0.00244355200028159	CD247, FYN, IFNG, IL4, IL10, NFATC1, NFATC2, PAK1, PIK3CD, RELA, TNF, MAP3K14	0.00366532800042239
Down Syndrome	hsa03410	Base excision repair	0.00266272226282812	PARP1, PARP4, APEX1, POLB, XRCC1, APEX2	0.00387996672583526
Down Syndrome	hsa05416	Viral myocarditis	0.00313348917982324	ABL1, ACTB, CCND1, CASP3, FYN, HLA-A, HLA-B, ITGAL, ITGB2	0.00443910967141625
Down Syndrome	hsa05143	African trypanosomiasis	0.00362773614954438	APOA1, IFNG, IL1B, IL6, IL10, TNF	0.00500039307099361
Down Syndrome	hsa00590	Arachidonic acid metabolism	0.00377398715073825	CBR1, CYP2B6, GPX3, LTA4H, PTGDS, PTGS2, PLA2G2D, HPGDS	0.00506508801809607
Down Syndrome	hsa04672	Intestinal immune network for IgA production	0.00439741840965524	IL4, IL6, IL10, IL15, LTBR, TGFB1, MAP3K14	0.0057504702280107
Down Syndrome	hsa05131	Shigellosis	0.00465006433897047	ABL1, ACTB, CXCL8, MAPK10, RELA, U2AF1, MAD2L2, NOD2	0.00592883203218735
Down Syndrome	hsa05330	Allograft rejection	0.0048309276237969	HLA-A, HLA-B, IFNG, IL4, IL10, TNF	0.00600920265399126
Down Syndrome	hsa05210	Colorectal cancer	0.00514279440985704	CCND1, BCL2, CASP3, PIK3CD, MAPK10, TGFB1, TP53, APPL1	0.00624482178339783
Down Syndrome	hsa04610	Complement and coagulation cascades	0.00979235110553357	A2M, SERPINC1, BDKRB1, C9, CD59, F7, KNG1, SERPINA1	0.0116141838693538
Down Syndrome	hsa05211	Renal cell carcinoma	0.0106515590959478	EPAS1, PAK1, PDGFB, PGF, PIK3CD, PTPN11, TGFB1, VEGFA	0.0123461253157577
Down Syndrome	hsa04010	MAPK signaling pathway	0.0126087486016403	BDNF, CASP3, FLNA, IL1A, IL1B, STMN1, MAPT, NFATC2, NGF, NTF3, PAK1, PDGFB, MAPK10, RELA, TGFB1, TNF, TNFRSF1A, TP53, MAP3K14, PLA2G2D	0.014289915081859
Down Syndrome	hsa05120	Epithelial cell signaling in Helicobacter pylori infection	0.0277756578602603	CASP3, CXCL8, PAK1, MAPK10, PTPN11, RELA, MAP3K14	0.0307947511059408
Down Syndrome	hsa05223	Non-small cell lung cancer	0.0290568034011755	CCND1, E2F1, ERBB2, PIK3CD, TP53, RASSF1	0.0315297228395734
Down Syndrome	hsa04623	Cytosolic DNA-sensing pathway	0.0340075665658619	ADAR, IFNA1, IFNA13, IL1B, IL6, RELA	0.0361330394762283
Down Syndrome	hsa04012	ErbB signaling pathway	0.0351270416167333	ABL1, CDKN1A, CDKN1B, ERBB2, MTOR, PAK1, PIK3CD, MAPK10	0.0363164564721386
Down Syndrome	hsa05216	Thyroid cancer	0.035604369090332	CCND1, RET, TP53, PAX8	0.0363164564721386
Down Syndrome	hsa04110	Cell cycle	0.043509202818704	ABL1, CCND1, CDKN1A, CDKN1B, CDKN1C, E2F1, TGFB1, TP53, YWHAG, MAD2L2	0.043509202818704
Mental Depression	hsa04080	Neuroactive ligand-receptor interaction	6.04738499036371e-26	ADCYAP1R1, ADRA2A, ADRA2C, ADRB1, ADRB2, AGTR1, AVPR1B, TSPO, CHRM2, CHRNA2, CHRNA4, CHRNB2, CHRNB3, CHRNB4, CNR1, CNR2, CRHR1, CRHR2, DRD1, DRD2, DRD3, DRD4, GABRA3, GABRA6, GABRB3, GH1, MCHR1, GRIA1, GRIA3, GRID1, GRIK3, GRIK4, GRIN1, GRIN2A, GRIN2B, GRIN2D, NR3C1, GRM1, GRM3, GRM5, GRM7, GRPR, HCRTR1, HTR1A, HTR1B, HTR2A, HTR2C, HTR4, HTR6, HTR7, LEP, MC1R, MC4R, NPY1R, NPY2R, OPRK1, OPRM1, OX…	4.41459104296551e-24
Mental Depression	hsa05014	Amyotrophic lateral sclerosis (ALS)	4.62392655484991e-15	BAX, BCL2L1, CASP1, CAT, MAPK14, GPX1, GRIA1, GRIN1, GRIN2A, GRIN2B, GRIN2D, NEFM, NEFL, NOS1, PPP3CC, RAC1, SLC1A2, SOD1, TNF, TNFRSF1A, TNFRSF1B, TP53, TOMM40	1.68773319252022e-13
Mental Depression	hsa04020	Calcium signaling pathway	3.89034949088533e-13	ADCY1, ADCY7, ADCY8, ADRB1, ADRB2, AGTR1, ATP2A2, AVPR1B, CACNA1C, CALM1, CALM2, CALM3, CAMK2A, CHRM2, DRD1, EGFR, ERBB3, GNAQ, GRIN1, GRIN2A, GRIN2D, GRM1, GRM5, GRPR, HTR2A, HTR2C, HTR4, HTR6, HTR7, NOS1, NOS2, NOS3, OXTR, P2RX7, PDE1B, PPP3CC, PRKCB, TACR1, TACR3	9.46651709448763e-12
Mental Depression	hsa04722	Neurotrophin signaling pathway	3.71227694464132e-11	AKT1, FASLG, ATF4, BAX, BDNF, CALM1, CALM2, CALM3, CAMK2A, MAPK14, GSK3B, JUN, NGF, NGFR, NTF3, NTRK1, NTRK2, NTRK3, MAPK1, MAPK3, MAPK8, MAP2K5, PSEN1, RAC1, RAP1A, SORT1, TP53, YWHAZ, MAGED1, KIDINS220	6.04678496400875e-10
Mental Depression	hsa04720	Long-term potentiation	4.14163353699229e-11	ADCY1, ADCY8, ATF4, CACNA1C, CALM1, CALM2, CALM3, CAMK2A, GNAQ, GRIA1, GRIN1, GRIN2A, GRIN2B, GRIN2D, GRM1, GRM5, PPP3CC, PRKCB, MAPK1, MAPK3, RAP1A, RAPGEF3	6.04678496400875e-10
Mental Depression	hsa04010	MAPK signaling pathway	1.21447724578474e-10	AKT1, FAS, FASLG, ARRB1, ARRB2, ATF4, BDNF, CACNA1C, ATF2, MAPK14, DUSP1, DUSP4, DUSP6, EGFR, FGF2, FGF9, FGF13, FGFR1, FGFR2, FLNA, IL1A, IL1B, JUN, STMN1, NGF, NTF3, NTRK1, NTRK2, PLA2G1B, PLA2G2A, PPP3CC, PRKCB, MAPK1, MAPK3, MAPK8, MAP2K5, RAC1, RAP1A, TGFB1, TNF, TNFRSF1A, TP53, PLA2G6, FGF17, FGF20	1.47761398237143e-09
Mental Depression	hsa05200	Pathways in cancer	7.09824555646183e-08	AKT1, FAS, FASLG, AR, BAX, BCL2L1, CDKN2A, EGFR, FGF2, FGF9, FGF13, FGFR1, FGFR2, GSK3B, HDAC2, HIF1A, HSP90AA1, HSP90AB1, IGF1, IL6, CXCL8, ITGB1, JUN, KIT, LAMC2, MET, NOS2, NTRK1, PRKCB, MAPK1, MAPK3, MAPK8, PTGS2, RAC1, RARA, SLC2A1, STAT3, TGFB1, TP53, VEGFA, FZD5, FZD1, FZD6, FGF17, FGF20	7.40245608031019e-07
Mental Depression	hsa05142	Chagas disease (American trypanosomiasis)	1.40296603365206e-07	ADCY1, AKT1, FAS, FASLG, MAPK14, ACE, GNAQ, IFNG, IL1B, IL6, CXCL8, IL10, JUN, NOS2, SERPINE1, MAPK1, MAPK3, MAPK8, TGFB1, TLR4, TNF, TNFRSF1A	1.2802065057075e-06
Mental Depression	hsa04710	Circadian rhythm	1.79522816036951e-07	ARNTL, CRY1, CRY2, NPAS2, PER1, RORA, PER3, PER2, NR1D1, CLOCK	1.45612950785527e-06
Mental Depression	hsa04912	GnRH signaling pathway	3.70036196916241e-07	ADCY1, ADCY5, ADCY7, ADCY8, ATF4, CACNA1C, CALM1, CALM2, CALM3, CAMK2A, MAPK14, EGFR, GNAQ, JUN, PLA2G1B, PLA2G2A, PRKCB, MAPK1, MAPK3, MAPK8, PLA2G6	2.45569476135324e-06
Mental Depression	hsa04916	Melanogenesis	3.70036196916241e-07	ADCY1, ADCY5, ADCY7, ADCY8, CALM1, CALM2, CALM3, CAMK2A, CREB1, EDN1, GNAQ, GSK3B, KIT, MC1R, POMC, PRKCB, MAPK1, MAPK3, FZD5, FZD1, FZD6	2.45569476135324e-06
Mental Depression	hsa05143	African trypanosomiasis	3.49839783223829e-06	FAS, FASLG, GNAQ, IFNG, IL1B, IL6, IL10, IL18, IDO1, PRKCB, TNF	2.09745608864394e-05
Mental Depression	hsa05140	Leishmaniasis	3.73519577429743e-06	MAPK14, IFNG, IL1A, IL1B, IL4, IL10, ITGB1, JUN, NOS2, PRKCB, MAPK1, MAPK3, PTGS2, TGFB1, TLR4, TNF	2.09745608864394e-05
Mental Depression	hsa04540	Gap junction	4.61803000187484e-06	ADCY1, ADCY5, ADCY7, ADCY8, ADRB1, DRD1, DRD2, EGFR, GJA1, GNAQ, GRM1, GRM5, HTR2A, HTR2C, PRKCB, MAPK1, MAPK3, MAP2K5	2.40797278669188e-05
Mental Depression	hsa05010	Alzheimer's disease	5.43877709515461e-06	ADAM10, APOE, APP, FAS, ATP2A2, ATP5F1A, CACNA1C, CALM1, CALM2, CALM3, COX4I1, GNAQ, GRIN1, GRIN2A, GRIN2B, GRIN2D, GSK3B, IL1B, NOS1, PPP3CC, MAPK1, MAPK3, PSEN1, SNCA, TNF, TNFRSF1A	2.64687151964191e-05
Mental Depression	hsa05144	Malaria	6.17833690527209e-06	CD36, GYPA, GYPB, IFNG, IL1B, IL6, CXCL8, IL10, IL18, MET, TGFB1, TLR4, TNF	2.81886621303039e-05
Mental Depression	hsa04730	Long-term depression	1.20923881805686e-05	CRH, CRHR1, GNAQ, GRIA1, GRIA3, GRM1, GRM5, IGF1, NOS1, PLA2G1B, PLA2G2A, PRKCB, MAPK1, MAPK3, PLA2G6	5.19261374812652e-05
Mental Depression	hsa00380	Tryptophan metabolism	2.45244445096089e-05	AANAT, ALDH2, ASMT, ALDH7A1, CAT, CYP1A2, IDO1, MAOA, MAOB, TPH1, TPH2	9.94602471778582e-05
Mental Depression	hsa04920	Adipocytokine signaling pathway	3.81151251345105e-05	AKT1, CD36, ACSL4, LEP, NPY, POMC, MAPK8, SLC2A1, STAT3, TNF, TNFRSF1A, TNFRSF1B, ADIPOQ, PPARGC1A	0.000146442322885224
Mental Depression	hsa05218	Melanoma	6.31438289222343e-05	AKT1, CDKN2A, EGFR, FGF2, FGF9, FGF13, FGFR1, IGF1, MET, MAPK1, MAPK3, TP53, FGF17, FGF20	0.000230474975566155
Mental Depression	hsa04060	Cytokine-cytokine receptor interaction	9.69635955447925e-05	FAS, FASLG, CNTF, CSF2, CX3CR1, EGFR, GH1, IFNA1, IFNA13, IFNAR1, IFNG, IL1A, IL1B, IL4, IL6, IL6R, CXCL8, IL10, IL13, IL17A, IL18, KIT, LEP, LIF, MET, NGFR, PRL, TGFB1, TNF, TNFRSF1A, TNFRSF1B, VEGFA	0.000337063927369993
Mental Depression	hsa04621	NOD-like receptor signaling pathway	0.00013000159260994	CASP1, MAPK14, HSP90AA1, HSP90AB1, IL1B, IL6, CXCL8, IL18, MAPK1, MAPK3, MAPK8, TNF	0.000431368920932981
Mental Depression	hsa00590	Arachidonic acid metabolism	0.000154547781001977	CYP2B6, CYP2C19, CYP2C9, CYP2E1, GPX1, LTA4H, PLA2G1B, PLA2G2A, PTGS1, PTGS2, PLA2G6, PLB1	0.000490521217962797
Mental Depression	hsa04380	Osteoclast differentiation	0.00019572428364257	AKT1, CREB1, MAPK14, FOSB, IFNAR1, IFNG, IL1A, IL1B, ITGB3, JUN, PPP3CC, MAPK1, MAPK3, MAPK8, RAC1, TGFB1, TNF, TNFRSF1A, SIRPA	0.000595328029412817
Mental Depression	hsa04664	Fc epsilon RI signaling pathway	0.000210462580498412	AKT1, MAPK14, CSF2, IL4, IL13, PLA2G1B, PLA2G2A, PRKCB, MAPK1, MAPK3, MAPK8, RAC1, TNF, PLA2G6	0.000614550735055362
Mental Depression	hsa05215	Prostate cancer	0.000224774871264521	AKT1, AR, ATF4, CREB1, EGFR, FGFR1, FGFR2, GSK3B, HSP90AA1, HSP90AB1, IGF1, INSRR, MAPK1, MAPK3, TP53	0.000631098677011925
Mental Depression	hsa00591	Linoleic acid metabolism	0.000281671158131641	CYP1A2, CYP2C19, CYP2C9, CYP2E1, PLA2G1B, PLA2G2A, PLA2G6, PLB1	0.00076155535346703
Mental Depression	hsa05145	Toxoplasmosis	0.000294351789728571	AKT1, BCL2L1, MAPK14, IFNG, IL10, ITGB1, LAMC2, NOS2, PLA2G1B, PLA2G2A, MAPK1, MAPK3, MAPK8, STAT3, TGFB1, TLR4, TNF, TNFRSF1A, PLA2G6	0.00076741716607806
Mental Depression	hsa04620	Toll-like receptor signaling pathway	0.000328814138331609	AKT1, MAPK14, IFNA1, IFNA13, IFNAR1, IL1B, IL6, CXCL8, JUN, MAPK1, MAPK3, MAPK8, RAC1, TLR3, TLR4, TNF	0.000827704555110602
Mental Depression	hsa05214	Glioma	0.000401277097895148	AKT1, CALM1, CALM2, CALM3, CAMK2A, CDKN2A, EGFR, IGF1, PRKCB, MAPK1, MAPK3, TP53	0.000976440938211526
Mental Depression	hsa04270	Vascular smooth muscle contraction	0.00049203924453459	ADCY1, ADCY5, ADCY7, ADCY8, AGTR1, AVPR1B, CACNA1C, CALM1, CALM2, CALM3, GNAQ, PLA2G1B, PLA2G2A, PRKCB, MAPK1, MAPK3, PLA2G6	0.00115135319260031
Mental Depression	hsa04370	VEGF signaling pathway	0.00050470276935904	AKT1, MAPK14, NOS3, PLA2G1B, PLA2G2A, PPP3CC, PRKCB, MAPK1, MAPK3, PTGS2, RAC1, VEGFA, PLA2G6	0.00115135319260031
Mental Depression	hsa04210	Apoptosis	0.000590492428381835	AKT1, FAS, FASLG, ATM, BAX, BCL2L1, IL1A, IL1B, NGF, NTRK1, PPP3CC, TNF, TNFRSF1A, TP53	0.00130624082642042
Mental Depression	hsa04970	Salivary secretion	0.000747000199595701	ADCY1, ADCY5, ADCY7, ADCY8, ADRB1, ADRB2, ATP1A3, CALM1, CALM2, CALM3, GNAQ, NOS1, PRKCB, SLC12A2	0.00160385336972018
Mental Depression	hsa05212	Pancreatic cancer	0.000808073930441442	AKT1, BCL2L1, CDKN2A, EGFR, MAPK1, MAPK3, MAPK8, RAC1, STAT3, TGFB1, TP53, VEGFA	0.00168541134063501
Mental Depression	hsa05020	Prion diseases	0.000869993174266466	BAX, IL1A, IL1B, IL6, NCAM1, MAPK1, MAPK3, SOD1	0.00176415282559589
Mental Depression	hsa00982	Drug metabolism - cytochrome P450	0.00118699296258173	ADH1B, ALDH3A1, CYP1A2, CYP2B6, CYP2C19, CYP2C9, CYP2D6, CYP2E1, GSTM1, GSTT1, MAOA, MAOB	0.00234190503428288
Mental Depression	hsa04971	Gastric acid secretion	0.00134208218232508	ADCY1, ADCY5, ADCY7, ADCY8, ATP1A3, CALM1, CALM2, CALM3, CAMK2A, GNAQ, KCNK2, PRKCB	0.00257821050815082
Mental Depression	hsa05146	Amoebiasis	0.0015036593977258	ADCY1, CSF2, GNAQ, IFNG, IL1B, IL6, CXCL8, IL10, LAMC2, NOS2, SERPINB2, PRKCB, TGFB1, TLR4, TNF	0.00281454194958932
Mental Depression	hsa04640	Hematopoietic cell lineage	0.00206572690122626	CD1A, MS4A1, CD36, CSF2, GYPA, IL1A, IL1B, IL4, IL6, IL6R, ITGB3, KIT, TNF	0.00376995159473792
Mental Depression	hsa04630	Jak-STAT signaling pathway	0.00215756146710342	AKT1, BCL2L1, CISH, CNTF, CSF2, GH1, IFNA1, IFNA13, IFNAR1, IFNG, IL4, IL6, IL6R, IL10, IL13, LEP, LIF, PRL, STAT3	0.00384151188045244
Mental Depression	hsa05160	Hepatitis C	0.00252403765718997	AKT1, MAPK14, EGFR, GSK3B, IFNA1, IFNA13, IFNAR1, CXCL8, OAS2, MAPK1, MAPK3, MAPK8, STAT3, TLR3, TNF, TNFRSF1A, TP53	0.00423267465034231
Mental Depression	hsa05414	Dilated cardiomyopathy	0.00253673257582344	ADCY1, ADCY5, ADCY7, ADCY8, ADRB1, ATP2A2, CACNA1C, IGF1, ITGB1, ITGB3, TGFB1, TNF, TNNI3	0.00423267465034231
Mental Depression	hsa00350	Tyrosine metabolism	0.00257683180416796	ADH1B, ALDH3A1, COMT, DBH, MAOA, MAOB, TAT, TH	0.00423267465034231
Mental Depression	hsa04972	Pancreatic secretion	0.00260918300363567	ADCY1, ADCY5, ADCY7, ADCY8, ATP1A3, ATP2A2, GNAQ, PLA2G1B, PLA2G2A, PRKCB, RAC1, RAP1A, SLC12A2, PLA2G6	0.00423267465034231
Mental Depression	hsa05211	Renal cell carcinoma	0.00273066735140413	AKT1, HIF1A, JUN, MET, MAPK1, MAPK3, RAC1, RAP1A, SLC2A1, TGFB1, VEGFA	0.0043334503620109
Mental Depression	hsa05323	Rheumatoid arthritis	0.0028033133598173	CSF2, IFNG, IL1A, IL1B, IL6, CXCL8, IL17A, IL18, JUN, TGFB1, TLR4, TNF, VEGFA	0.0043540824524822
Mental Depression	hsa05210	Colorectal cancer	0.00346482369187728	AKT1, BAX, GSK3B, JUN, MAPK1, MAPK3, MAPK8, RAC1, TGFB1, TP53	0.00526941936473003
Mental Depression	hsa00330	Arginine and proline metabolism	0.00435981973887123	ALDH2, ALDH7A1, GLUL, MAOA, MAOB, NOS1, NOS2, NOS3, SAT1	0.00649524165178775
Mental Depression	hsa04914	Progesterone-mediated oocyte maturation	0.00489267835098126	ADCY1, ADCY5, ADCY7, ADCY8, AKT1, MAPK14, HSP90AA1, HSP90AB1, IGF1, MAPK1, MAPK3, MAPK8	0.00714331039243264
Mental Depression	hsa05016	Huntington's disease	0.00633514924643747	AP2B1, ATP5F1A, BAX, BDNF, COX4I1, CREB1, DLG4, GNAQ, GPX1, GRIN1, GRIN2B, GRM1, GRM5, HTT, HDAC2, SOD1, SOD2, TBP, TP53, PPARGC1A	0.00906795872529285
Mental Depression	hsa04114	Oocyte meiosis	0.00672259378800901	ADCY1, ADCY5, ADCY7, ADCY8, AR, CALM1, CALM2, CALM3, CAMK2A, IGF1, PPP3CC, MAPK1, MAPK3, YWHAZ	0.00943748743316649
Mental Depression	hsa05332	Graft-versus-host disease	0.010074083144105	FAS, FASLG, IFNG, IL1A, IL1B, IL6, TNF	0.0138756239532012
Mental Depression	hsa05219	Bladder cancer	0.0114847704844232	CDKN2A, EGFR, CXCL8, MAPK1, MAPK3, TP53, VEGFA	0.0152434226429618
Mental Depression	hsa04960	Aldosterone-regulated sodium reabsorption	0.0114847704844232	ATP1A3, HSD11B1, IGF1, NR3C2, PRKCB, MAPK1, MAPK3	0.0152434226429618
Mental Depression	hsa04660	T cell receptor signaling pathway	0.012017960236461	AKT1, MAPK14, CSF2, GSK3B, IFNG, IL4, IL10, JUN, PPP3CC, MAPK1, MAPK3, PTPRC, TNF	0.0156662695939581
Mental Depression	hsa04940	Type I diabetes mellitus	0.0130331291594812	FAS, FASLG, GAD1, IFNG, IL1A, IL1B, TNF	0.0166915513796864
Mental Depression	hsa04012	ErbB signaling pathway	0.0142462085484169	AKT1, CAMK2A, EGFR, ERBB3, GSK3B, NRG1, JUN, PRKCB, MAPK1, MAPK3, MAPK8	0.0179305728281799
Mental Depression	hsa04614	Renin-angiotensin system	0.0162313717237879	AGT, AGTR1, ACE, REN	0.0197481689306087
Mental Depression	hsa00360	Phenylalanine metabolism	0.0162313717237879	ALDH3A1, MAOA, MAOB, TAT	0.0197481689306087
Mental Depression	hsa00670	One carbon pool by folate	0.0199050712261577	MTHFD1, MTHFR, MTR, MTHFD1L	0.0238208229427788
Mental Depression	hsa05330	Allograft rejection	0.0213581865350544	FAS, FASLG, IFNG, IL4, IL10, TNF	0.0251475422106286
Mental Depression	hsa00980	Metabolism of xenobiotics by cytochrome P450	0.0250307948690034	ADH1B, ALDH3A1, CYP1A2, CYP2B6, CYP2C19, CYP2C9, CYP2E1, GSTM1, GSTT1	0.0290039369117024
Mental Depression	hsa05410	Hypertrophic cardiomyopathy (HCM)	0.0257968430157588	ATP2A2, CACNA1C, ACE, IGF1, IL6, ITGB1, ITGB3, TGFB1, TNF, TNNI3	0.0294245240648499
Mental Depression	hsa00340	Histidine metabolism	0.0272200981198361	ALDH2, ALDH3A1, ALDH7A1, MAOA, MAOB	0.030107078223455
Mental Depression	hsa04744	Phototransduction	0.0272200981198361	ARRB1, ARRB2, CALM1, CALM2, CALM3	0.030107078223455
Mental Depression	hsa05131	Shigellosis	0.0280947067743356	MAPK14, CXCL8, ITGB1, MAPK1, MAPK3, MAPK8, RAC1, WASF1	0.0306106506645746
Mental Depression	hsa00592	alpha-Linolenic acid metabolism	0.0286820736110642	PLA2G1B, PLA2G2A, PLA2G6, PLB1	0.0307910496118778
Mental Depression	hsa04062	Chemokine signaling pathway	0.0336504369261927	ADCY1, ADCY5, ADCY7, ADCY8, GRK2, AKT1, ARRB1, ARRB2, CX3CR1, GNB3, GSK3B, CXCL8, PRKCB, MAPK1, MAPK3, RAC1, RAP1A, STAT3	0.0356011868929285
Mental Depression	hsa00410	beta-Alanine metabolism	0.039427956709101	ABAT, ALDH2, ALDH7A1, GAD1	0.0410235181732709
Mental Depression	hsa00640	Propanoate metabolism	0.0398995861685237	ABAT, ALDH2, ALDH7A1, LDHA, SUCLA2	0.0410235181732709
Mental Depression	hsa05223	Non-small cell lung cancer	0.0409425881567042	AKT1, CDKN2A, EGFR, PRKCB, MAPK1, MAPK3, TP53	0.0415112352144362
Mental Depression	hsa05120	Epithelial cell signaling in Helicobacter pylori infection	0.0492572567554139	ADAM10, MAPK14, EGFR, CXCL8, JUN, MET, MAPK8, RAC1	0.0492572567554139
T-Cell Lymphoma	hsa04660	T cell receptor signaling pathway	2.72337490148775e-22	AKT1, AKT2, RHOA, CD3E, CD247, CD28, CD40LG, CDK4, MAP3K8, CSF2, CTLA4, IKBKB, IL2, IL4, IL5, IL10, ITK, KRAS, LCK, NFKB1, PDCD1, PRKCQ, MAP2K1, PTPN6, TNF, VAV1, ZAP70, BCL10, RASGRP1, MALT1, PIK3R5	1.79742743498192e-20
T-Cell Lymphoma	hsa05200	Pathways in cancer	1.69674362557883e-21	AKT1, AKT2, BIRC2, BIRC3, FAS, FASLG, RHOA, BCL2, CDK4, CDK6, CDKN2A, CDKN2B, CTNNB1, EGFR, EP300, ETS1, FGFR1, MTOR, GLI1, MSH6, HIF1A, IGF1, IGF1R, IKBKB, IL6, JAK1, KIT, KRAS, MET, MYC, NFKB1, NFKB2, NOS2, PDGFRA, PPARG, MAP2K1, PTEN, RARA, RB1, STAT3, STAT5B, TGFB1, TP53, TRAF6, VEGFA, PIAS2, RASSF1, PIK3R5, LEF1	5.59925396441013e-20
T-Cell Lymphoma	hsa04060	Cytokine-cytokine receptor interaction	2.10091925936704e-18	FAS, FASLG, TNFRSF17, CD27, TNFRSF8, CD40LG, CD70, CSF2, EGFR, IFNA1, IFNA13, IL1A, IL1B, IL2, IL2RA, IL2RB, IL2RG, IL3, IL4, IL5, IL6, IL9, IL10, IL15, KDR, KIT, LTA, MET, PDGFRA, CCL17, CXCL12, TGFB1, TNF, VEGFA, CXCR4, TNFRSF6B, CXCL13, TNFSF13B, CCR9, CLCF1, TNFRSF13C	4.62202237060748e-17
T-Cell Lymphoma	hsa04630	Jak-STAT signaling pathway	2.78585426817867e-17	AKT1, AKT2, CCND2, CCND3, CSF2, EP300, IFNA1, IFNA13, IL2, IL2RA, IL2RB, IL2RG, IL3, IL4, IL5, IL6, IL9, IL10, IL15, JAK1, JAK2, JAK3, MYC, PIM1, PTPN6, STAT3, STAT5B, SOCS3, PIAS2, CLCF1, PIK3R5	4.59665954249481e-16
T-Cell Lymphoma	hsa04672	Intestinal immune network for IgA production	2.37087591213406e-14	TNFRSF17, CD28, CD40LG, HLA-DQB1, IL2, IL4, IL5, IL6, IL10, IL15, ITGB7, CXCL12, TGFB1, CXCR4, TNFSF13B, CCR9, TNFRSF13C	3.12955620401696e-13
T-Cell Lymphoma	hsa05215	Prostate cancer	1.81305039092827e-12	AKT1, AKT2, BCL2, CTNNB1, EGFR, EP300, FGFR1, MTOR, IGF1, IGF1R, IKBKB, KRAS, NFKB1, PDGFRA, MAP2K1, PTEN, RB1, TP53, PIK3R5, LEF1	1.99435543002109e-11
T-Cell Lymphoma	hsa05221	Acute myeloid leukemia	8.54785711207143e-12	AKT1, AKT2, EIF4EBP1, MTOR, IKBKB, KIT, KRAS, MYC, NFKB1, PIM1, MAP2K1, RARA, STAT3, STAT5B, PIK3R5, LEF1	8.05940813423877e-11
T-Cell Lymphoma	hsa05212	Pancreatic cancer	2.40816114954378e-11	AKT1, AKT2, CDK4, CDK6, CDKN2A, EGFR, IKBKB, JAK1, KRAS, NFKB1, MAP2K1, RB1, STAT3, TGFB1, TP53, VEGFA, PIK3R5	1.8724553991539e-10
T-Cell Lymphoma	hsa05320	Autoimmune thyroid disease	2.5533482715735e-11	FAS, FASLG, CD28, CD40LG, CTLA4, GZMB, HLA-DQB1, HLA-G, IFNA1, IFNA13, IL2, IL4, IL5, IL10, PRF1	1.8724553991539e-10
T-Cell Lymphoma	hsa05218	Melanoma	3.08063756490168e-11	AKT1, AKT2, CDK4, CDK6, CDKN2A, EGFR, FGFR1, IGF1, IGF1R, KRAS, MET, PDGFRA, MAP2K1, PTEN, RB1, TP53, PIK3R5	2.03322079283511e-10
T-Cell Lymphoma	hsa05330	Allograft rejection	3.4185419503315e-11	FAS, FASLG, CD28, CD40LG, GZMB, HLA-DQB1, HLA-G, IL2, IL4, IL5, IL10, PRF1, TNF	2.0511251701989e-10
T-Cell Lymphoma	hsa05222	Small cell lung cancer	7.20004510822614e-11	AKT1, AKT2, BIRC2, BIRC3, BCL2, CDK4, CDK6, CDKN2B, IKBKB, MYC, NFKB1, NOS2, PTEN, RB1, TP53, TRAF6, PIAS2, PIK3R5	3.89915921528133e-10
T-Cell Lymphoma	hsa05214	Glioma	7.68016209070564e-11	AKT1, AKT2, CDK4, CDK6, CDKN2A, EGFR, MTOR, IGF1, IGF1R, KRAS, PDGFRA, MAP2K1, PTEN, RB1, TP53, PIK3R5	3.89915921528133e-10
T-Cell Lymphoma	hsa05332	Graft-versus-host disease	2.25061927267894e-09	FAS, FASLG, CD28, GZMB, HLA-DQB1, HLA-G, IL1A, IL1B, IL2, IL6, PRF1, TNF	1.06100622854864e-08
T-Cell Lymphoma	hsa05140	Leishmaniasis	3.79885907598342e-09	CYBA, HLA-DQB1, IL1A, IL1B, IL4, IL10, JAK1, JAK2, NFKB1, NOS2, PTPN6, TGFB1, TNF, TRAF6, MARCKSL1	1.67149799343271e-08
T-Cell Lymphoma	hsa04940	Type I diabetes mellitus	4.13693781466824e-09	FAS, FASLG, CD28, GZMB, HLA-DQB1, HLA-G, IL1A, IL1B, IL2, LTA, PRF1, TNF	1.70648684855065e-08
T-Cell Lymphoma	hsa05220	Chronic myeloid leukemia	4.65162009653873e-09	AKT1, AKT2, CDK4, CDK6, CDKN2A, IKBKB, KRAS, MYC, NFKB1, MAP2K1, RB1, STAT5B, TGFB1, TP53, PIK3R5	1.80592309630327e-08
T-Cell Lymphoma	hsa04210	Apoptosis	7.66961270507325e-09	AKT1, AKT2, BIRC2, BIRC3, FAS, FASLG, ATM, BCL2, IKBKB, IL1A, IL1B, IL3, NFKB1, TNF, TP53, PIK3R5	2.81219132519353e-08
T-Cell Lymphoma	hsa04380	Osteoclast differentiation	1.18402974846819e-08	AKT1, AKT2, CYBA, IKBKB, IL1A, IL1B, JAK1, JUNB, LCK, NFKB1, NFKB2, PPARG, MAP2K1, SYK, TGFB1, TNF, TRAF6, SOCS3, PIK3R5	4.11294544204739e-08
T-Cell Lymphoma	hsa05142	Chagas disease (American trypanosomiasis)	1.65146836254209e-08	AKT1, AKT2, FAS, FASLG, CD3E, CD247, IKBKB, IL1B, IL2, IL6, IL10, NFKB1, NOS2, TGFB1, TNF, TRAF6, PIK3R5	5.44984559638889e-08
T-Cell Lymphoma	hsa04650	Natural killer cell mediated cytotoxicity	3.28145394295593e-08	FAS, FASLG, CD247, CSF2, GZMB, HLA-G, IFNA1, IFNA13, KRAS, LCK, PRF1, MAP2K1, PTPN6, SYK, TNF, VAV1, ZAP70, KLRK1, PIK3R5	1.03131409635758e-07
T-Cell Lymphoma	hsa05210	Colorectal cancer	4.00937270528293e-08	AKT1, AKT2, RHOA, BCL2, CTNNB1, MSH6, KRAS, MYC, MAP2K1, TGFB1, TP53, PIK3R5, LEF1	1.20281181158488e-07
T-Cell Lymphoma	hsa05223	Non-small cell lung cancer	6.83916395201756e-08	AKT1, AKT2, CDK4, CDK6, CDKN2A, EGFR, KRAS, MAP2K1, RB1, TP53, RASSF1, PIK3R5	1.9625426992746e-07
T-Cell Lymphoma	hsa05145	Toxoplasmosis	1.12894242693378e-07	AKT1, AKT2, BIRC2, BIRC3, BCL2, CD40LG, HLA-DQB1, IKBKB, IL10, JAK1, JAK2, NFKB1, NOS2, STAT3, TGFB1, TNF, TRAF6, PIK3R5	3.10459167406789e-07
T-Cell Lymphoma	hsa04115	p53 signaling pathway	1.28358945128773e-07	FAS, ATM, ATR, CCND2, CCND3, CDK4, CDK6, CDKN2A, GADD45A, IGF1, PTEN, TP53, TP73	3.38867615139961e-07
T-Cell Lymphoma	hsa04510	Focal adhesion	2.10062059338986e-07	AKT1, AKT2, BIRC2, BIRC3, RHOA, BCL2, CAV1, CCND2, CCND3, CTNNB1, EGFR, IGF1, IGF1R, ITGB7, KDR, MET, PDGFRA, MAP2K1, PTEN, VAV1, VEGFA, PIK3R5	5.33234458322042e-07
T-Cell Lymphoma	hsa04110	Cell cycle	2.39518317159531e-07	ATM, ATR, CCND2, CCND3, CDK4, CDK6, CDKN2A, CDKN2B, GADD45A, EP300, MYC, RB1, TGFB1, TP53, ZBTB17, CUL1, ESPL1	5.85489219723298e-07
T-Cell Lymphoma	hsa04062	Chemokine signaling pathway	3.42132055589602e-07	AKT1, AKT2, RHOA, IKBKB, ITK, JAK2, JAK3, KRAS, NFKB1, MAP2K1, CCL17, CXCL12, STAT3, STAT5B, TIAM1, VAV1, CXCR4, CXCL13, CCR9, PIK3R5, GNG8	8.06454131032634e-07
T-Cell Lymphoma	hsa05213	Endometrial cancer	4.20120036498676e-07	AKT1, AKT2, CTNNB1, EGFR, KRAS, MYC, MAP2K1, PTEN, TP53, PIK3R5, LEF1	9.56135255479746e-07
T-Cell Lymphoma	hsa05219	Bladder cancer	4.42256922692244e-07	CDK4, CDKN2A, EGFR, KRAS, MYC, MAP2K1, RB1, TP53, VEGFA, RASSF1	9.70207531847662e-07
T-Cell Lymphoma	hsa04640	Hematopoietic cell lineage	4.55703537686023e-07	CD3E, MS4A1, CD44, CSF2, IL1A, IL1B, IL2RA, IL3, IL4, IL5, IL6, KIT, MME, TNF	9.70207531847662e-07
T-Cell Lymphoma	hsa04010	MAPK signaling pathway	7.238508558307e-07	AKT1, AKT2, FAS, FASLG, MAP3K8, ATF2, GADD45A, EGFR, FGFR1, IKBKB, IL1A, IL1B, KRAS, MYC, NFKB1, NFKB2, PDGFRA, MAP2K1, RASGRF2, TGFB1, TNF, TP53, TRAF6, RASGRP1, MAP3K20	1.48743597388247e-06
T-Cell Lymphoma	hsa05160	Hepatitis C	7.43717986941233e-07	AKT1, AKT2, EGFR, IFNA1, IFNA13, IKBKB, JAK1, KRAS, NFKB1, EIF2AK2, STAT3, TNF, TP53, TRAF6, SOCS3, PIAS2, PIK3R5	1.48743597388247e-06
T-Cell Lymphoma	hsa05340	Primary immunodeficiency	8.40187493914204e-07	ADA, CD3E, CD40LG, IL2RG, JAK3, LCK, RAG1, ZAP70, TNFRSF13C	1.63095219406875e-06
T-Cell Lymphoma	hsa05310	Asthma	2.59733116997856e-06	CD40LG, HLA-DQB1, IL3, IL4, IL5, IL9, IL10, TNF	4.89782449195958e-06
T-Cell Lymphoma	hsa04662	B cell receptor signaling pathway	2.92717181630511e-06	AKT1, AKT2, IKBKB, KRAS, NFKB1, MAP2K1, PTPN6, SYK, VAV1, BCL10, MALT1, PIK3R5	5.36648166322603e-06
T-Cell Lymphoma	hsa05323	Rheumatoid arthritis	4.16962661984676e-06	CD28, CSF2, CTLA4, HLA-DQB1, IL1A, IL1B, IL6, IL15, CXCL12, TGFB1, TNF, VEGFA, TNFSF13B	7.43771234891584e-06
T-Cell Lymphoma	hsa04664	Fc epsilon RI signaling pathway	5.14184241249036e-06	AKT1, AKT2, CSF2, IL3, IL4, IL5, KRAS, MAP2K1, SYK, TNF, VAV1, PIK3R5	8.93056840064115e-06
T-Cell Lymphoma	hsa05020	Prion diseases	9.12925130597179e-06	EGR1, IL1A, IL1B, IL6, NCAM1, NOTCH1, MAP2K1, PRNP	1.5174637292862e-05
T-Cell Lymphoma	hsa05211	Renal cell carcinoma	9.19674987446181e-06	AKT1, AKT2, EP300, ETS1, HIF1A, KRAS, MET, MAP2K1, TGFB1, VEGFA, PIK3R5	1.5174637292862e-05
T-Cell Lymphoma	hsa04620	Toll-like receptor signaling pathway	1.50363468110583e-05	AKT1, AKT2, MAP3K8, IFNA1, IFNA13, IKBKB, IL1B, IL6, NFKB1, MAP2K1, TNF, TRAF6, PIK3R5	2.42048509641426e-05
T-Cell Lymphoma	hsa05216	Thyroid cancer	2.30935538971685e-05	CTNNB1, KRAS, MYC, PPARG, MAP2K1, TP53, LEF1	3.60111996853551e-05
T-Cell Lymphoma	hsa05144	Malaria	2.34618422192465e-05	CD40LG, IL1B, IL6, IL10, LRP1, MET, TGFB1, TNF, KLRK1	3.60111996853551e-05
T-Cell Lymphoma	hsa04920	Adipocytokine signaling pathway	4.30339605130163e-05	AKT1, AKT2, MTOR, IKBKB, JAK2, NFKB1, PRKCQ, STAT3, TNF, SOCS3	6.45509407695245e-05
T-Cell Lymphoma	hsa04621	NOD-like receptor signaling pathway	6.79556478102422e-05	BIRC2, BIRC3, IKBKB, IL1B, IL6, MEFV, NFKB1, TNF, TRAF6	9.96682834550219e-05
T-Cell Lymphoma	hsa04722	Neurotrophin signaling pathway	0.000153974900501801	AKT1, AKT2, FASLG, RHOA, BCL2, IKBKB, KRAS, NFKB1, MAP2K1, TP53, TP73, TRAF6, PIK3R5	0.000220920509415628
T-Cell Lymphoma	hsa04150	mTOR signaling pathway	0.000184951482651163	AKT1, AKT2, EIF4EBP1, MTOR, HIF1A, IGF1, VEGFA, PIK3R5	0.000259719103297378
T-Cell Lymphoma	hsa04012	ErbB signaling pathway	0.000353461407527934	AKT1, AKT2, EGFR, EIF4EBP1, MTOR, KRAS, MYC, MAP2K1, STAT5B, PIK3R5	0.000486009435350909
T-Cell Lymphoma	hsa04520	Adherens junction	0.000413275130333508	RHOA, CTNNB1, EGFR, EP300, FGFR1, IGF1R, MET, PTPN6, LEF1	0.000556656298000235
T-Cell Lymphoma	hsa05143	African trypanosomiasis	0.000665590199452643	FAS, FASLG, IL1B, IL6, IL10, TNF	0.000878579063277489
T-Cell Lymphoma	hsa04320	Dorso-ventral axis formation	0.000750302248345661	EGFR, ETS1, KRAS, NOTCH1, MAP2K1	0.000970979380212031
T-Cell Lymphoma	hsa04350	TGF-beta signaling pathway	0.00116561261694456	RHOA, CDKN2B, EP300, ID2, ID3, MYC, TGFB1, TNF, CUL1	0.00147943139842963
T-Cell Lymphoma	hsa04144	Endocytosis	0.00149522727711933	RHOA, CAV1, EGFR, HLA-G, IGF1R, IL2RA, IL2RB, IL2RG, KDR, KIT, MET, PDGFRA, TGFB1, TRAF6, CXCR4	0.00186198113754483
T-Cell Lymphoma	hsa04930	Type II diabetes mellitus	0.00359199075912548	MTOR, IKBKB, PKLR, TNF, SOCS3, PIK3R5	0.00439021092782003
T-Cell Lymphoma	hsa05146	Amoebiasis	0.00576659980785562	CSF2, IL1B, IL6, IL10, NFKB1, NOS2, TGFB1, TNF, PIK3R5	0.00691991976942674
T-Cell Lymphoma	hsa04622	RIG-I-like receptor signaling pathway	0.00649596910335239	DDX3X, IFNA1, IFNA13, IKBKB, NFKB1, TNF, TRAF6	0.00765596358609389
T-Cell Lymphoma	hsa04623	Cytosolic DNA-sensing pathway	0.00773271586006136	IFNA1, IFNA13, IKBKB, IL1B, IL6, NFKB1	0.00895367099586052
T-Cell Lymphoma	hsa04530	Tight junction	0.0081836844166887	AKT1, AKT2, RHOA, CDK4, CTNNB1, KRAS, PRKCQ, PTEN, EPB41L3, MAP3K20	0.00931246847416301
T-Cell Lymphoma	hsa04514	Cell adhesion molecules (CAMs)	0.00861460841723841	CD28, CD40LG, CTLA4, HLA-DQB1, HLA-G, ITGB7, NCAM1, PDCD1, CADM1, PDCD1LG2	0.00963668060233449
T-Cell Lymphoma	hsa04370	VEGF signaling pathway	0.00937107777658661	AKT1, AKT2, KDR, KRAS, MAP2K1, VEGFA, PIK3R5	0.0103081855542453
T-Cell Lymphoma	hsa04910	Insulin signaling pathway	0.0110368117695853	AKT1, AKT2, EIF4EBP1, MTOR, IKBKB, KRAS, PKLR, MAP2K1, SOCS3, PIK3R5	0.0119414684720103
T-Cell Lymphoma	hsa04914	Progesterone-mediated oocyte maturation	0.0177541888419125	AKT1, AKT2, IGF1, IGF1R, KRAS, MAP2K1, PIK3R5	0.0188996203801004
T-Cell Lymphoma	hsa05416	Viral myocarditis	0.0218192840940886	CAV1, CD28, CD40LG, HLA-DQB1, HLA-G, PRF1	0.0228582976223785
T-Cell Lymphoma	hsa04666	Fc gamma R-mediated phagocytosis	0.0274908865416205	AKT1, AKT2, MAP2K1, SYK, VAV1, PIK3R5, MARCKSL1	0.0283499767460461
T-Cell Lymphoma	hsa04670	Leukocyte transendothelial migration	0.0286441544063489	RHOA, CTNNB1, CYBA, ITK, CXCL12, VAV1, CXCR4, PIK3R5	0.0290848337049081
T-Cell Lymphoma	hsa04310	Wnt signaling pathway	0.045361367639238	RHOA, CCND2, CCND3, CTNNB1, EP300, MYC, TP53, CUL1, LEF1	0.045361367639238
Corpus callosum agenesis neuronopathy	hsa00061	Fatty acid biosynthesis	0.00204377023778546	ACACA	0.0102188511889273
Corpus callosum agenesis neuronopathy	hsa00640	Propanoate metabolism	0.0108759494823528	ACACA	0.0226427419007336
Corpus callosum agenesis neuronopathy	hsa00620	Pyruvate metabolism	0.0135856451404401	ACACA	0.0226427419007336
Corpus callosum agenesis neuronopathy	hsa03008	Ribosome biogenesis in eukaryotes	0.0270783731558707	BMS1	0.0338479664448384
Corpus callosum agenesis neuronopathy	hsa04910	Insulin signaling pathway	0.0464777847349475	ACACA	0.0464777847349475
Phosphorus measurement	hsa00740	Riboflavin metabolism	0.0018742545578464	ENPP3	0.00681547111944107
Phosphorus measurement	hsa00770	Pantothenate and CoA biosynthesis	0.0027261884477765	ENPP3	0.00681547111944107
Phosphorus measurement	hsa00760	Nicotinate and nicotinamide metabolism	0.00408928267166464	ENPP3	0.00681547111944107
Phosphorus measurement	hsa00500	Starch and sucrose metabolism	0.00920088601124547	ENPP3	0.0115011075140568
Phosphorus measurement	hsa00230	Purine metabolism	0.0276026580337366	ENPP3	0.0276026580337366
Global brain atrophy	hsa00604	Glycosphingolipid biosynthesis - ganglio series	0.0202764328336975	ST3GAL5	0.0495689118513359
Global brain atrophy	hsa00770	Pantothenate and CoA biosynthesis	0.0216153102743076	PANK2	0.0495689118513359
Global brain atrophy	hsa00592	alpha-Linolenic acid metabolism	0.0269548239031042	PLA2G6	0.0495689118513359
Global brain atrophy	hsa00650	Butanoate metabolism	0.0401922078138979	L2HGDH	0.0495689118513359
Global brain atrophy	hsa00591	Linoleic acid metabolism	0.0401922078138979	PLA2G6	0.0495689118513359
Global brain atrophy	hsa05020	Prion diseases	0.0467516081208156	PRNP	0.0495689118513359
Global brain atrophy	hsa00565	Ether lipid metabolism	0.048058770811085	PLA2G6	0.0495689118513359
Global brain atrophy	hsa01100	Metabolic pathways	0.0495689118513359	PLA2G6, ST3GAL5, ALG9, PANK2	0.0495689118513359
Thyroid Hypoplasia	hsa05216	Thyroid cancer	0.00985885540271836	PAX8	0.0176432198431953
Thyroid Hypoplasia	hsa05320	Autoimmune thyroid disease	0.0176432198431953	TSHR	0.0176432198431953
Congenital hypoplasia of aortic arch	hsa05412	Arrhythmogenic right ventricular cardiomyopathy (ARVC)	0.012608621570966	GJA1	0.0153348100187426
Congenital hypoplasia of aortic arch	hsa04540	Gap junction	0.0153348100187426	GJA1	0.0153348100187426
Beta thalassemia trait	hsa05143	African trypanosomiasis	3.10339753973075e-05	HBA1, HBA2, HBB	0.000186203852383845
Beta thalassemia trait	hsa05144	Malaria	9.71365516551147e-05	HBA1, HBA2, HBB	0.000291409654965344
Beta thalassemia trait	hsa00561	Glycerolipid metabolism	0.00372516556959657	LPL, PNPLA3	0.00745033113919313
Beta thalassemia trait	hsa03320	PPAR signaling pathway	0.00719515927795285	LPL, ANGPTL4	0.0107927389169293
Beta thalassemia trait	hsa00061	Fatty acid biosynthesis	0.0111977148472742	ACACA	0.013437257816729
Beta thalassemia trait	hsa05010	Alzheimer's disease	0.0373970230012238	LPL, NOS1	0.0373970230012238
Splenic Hypoplasia	hsa05323	Rheumatoid arthritis	4.33276954557426e-08	ICAM1, IL1B, MMP3, CCL2, CCL3	4.76604650013168e-07
Splenic Hypoplasia	hsa05144	Malaria	3.45217314333992e-07	ICAM1, IL1B, CCL2, SELE	1.89869522883696e-06
Splenic Hypoplasia	hsa05143	African trypanosomiasis	1.06629791149101e-05	ICAM1, IL1B, SELE	3.90975900880038e-05
Splenic Hypoplasia	hsa05142	Chagas disease (American trypanosomiasis)	0.000283796315904579	IL1B, CCL2, CCL3	0.000780439868737592
Splenic Hypoplasia	hsa04621	NOD-like receptor signaling pathway	0.0025870250588818	IL1B, CCL2	0.00569145512953995
Splenic Hypoplasia	hsa04060	Cytokine-cytokine receptor interaction	0.00430394888881248	IL1B, CCL2, CCL3	0.00789057296282289
Splenic Hypoplasia	hsa04620	Toll-like receptor signaling pathway	0.0078224898160258	IL1B, CCL3	0.012292483996612
Splenic Hypoplasia	hsa04670	Leukocyte transendothelial migration	0.0100326228428774	ICAM1, MMP9	0.0137948564089565
Splenic Hypoplasia	hsa04514	Cell adhesion molecules (CAMs)	0.0130504028590177	ICAM1, SELE	0.0159504923832438
Splenic Hypoplasia	hsa04062	Chemokine signaling pathway	0.0254170809755882	CCL2, CCL3	0.0279587890731471
Splenic Hypoplasia	hsa05020	Prion diseases	0.0467516081208156	IL1B	0.0467516081208156
Thyroid Agenesis	hsa05320	Autoimmune thyroid disease	5.30869727233802e-05	TPO, TSHB, TSHR	0.000212347890893521
Thyroid Agenesis	hsa04080	Neuroactive ligand-receptor interaction	0.000472699068868203	THRA, TRHR, TSHB, TSHR	0.000945398137736407
Thyroid Agenesis	hsa04020	Calcium signaling pathway	0.0283218807826691	GNAS, TRHR	0.0377625077102255
Thyroid Agenesis	hsa05216	Thyroid cancer	0.0436312051924872	PAX8	0.0436312051924872
Coronary sinus defect	hsa04722	Neurotrophin signaling pathway	0.0216391208042256	NTF3	0.0432782416084512
Coronary sinus defect	hsa04010	MAPK signaling pathway	0.0456636565002557	NTF3	0.0456636565002557
ATRIAL FIBRILLATION, FAMILIAL, 1 (disorder)	hsa04971	Gastric acid secretion	3.7460295620073e-05	KCNJ2, KCNQ1, KCNE2	7.4920591240146e-05
ATRIAL FIBRILLATION, FAMILIAL, 1 (disorder)	hsa02010	ABC transporters	0.0441658750848148	ABCC9	0.0441658750848148
Dilatation of the aortic arch	hsa04320	Dorso-ventral axis formation	0.0122198235051519	NOTCH1	0.0317822477334138
Dilatation of the aortic arch	hsa05020	Prion diseases	0.0177871453736534	NOTCH1	0.0317822477334138
Dilatation of the aortic arch	hsa04330	Notch signaling pathway	0.0238366858000604	NOTCH1	0.0317822477334138
Dilatation of the aortic arch	hsa04350	TGF-beta signaling pathway	0.0423329679369964	SMAD6	0.0423329679369964
Growth failure	hsa00190	Oxidative phosphorylation	2.8395279485926e-06	NDUFA1, NDUFB3, NDUFB9, NDUFS1, NDUFS2, NDUFS3, NDUFV1, NDUFS4, NDUFS6, NDUFV2, TCIRG1, ATP6V0A4, NDUFA11	7.0988198714815e-05
Growth failure	hsa05012	Parkinson's disease	1.37091599621866e-05	NDUFA1, NDUFB3, NDUFB9, NDUFS1, NDUFS2, NDUFS3, NDUFV1, NDUFS4, NDUFS6, NDUFV2, HTRA2, NDUFA11	0.000171364499527333
Growth failure	hsa05016	Huntington's disease	9.64552028502123e-05	NDUFA1, NDUFB3, NDUFB9, NDUFS1, NDUFS2, NDUFS3, NDUFV1, NDUFS4, NDUFS6, NDUFV2, SOD1, SIN3A, NDUFA11	0.000673155184689367
Growth failure	hsa01100	Metabolic pathways	0.000107704829550299	ACACA, ADSL, ALOX12B, CYP11B2, CYP19A1, CYP27B1, DGUOK, DHCR7, DPYD, DPYS, HADH, HLCS, NDST1, NDUFA1, NDUFB3, NDUFB9, NDUFS1, NDUFS2, NDUFS3, NDUFV1, NDUFS4, NDUFS6, NDUFV2, PAFAH1B1, PAH, PRPS1, SPR, TAT, SUCLG1, TCIRG1, FTCD, SDS, LIAS, PHGDH, ATP6V0A4, AGK, PIGO, PIGY, CYP2R1, NDUFA11, GLYCTK	0.000673155184689367
Growth failure	hsa00100	Steroid biosynthesis	0.000540942693470353	CYP27B1, DHCR7, LIPA, CYP2R1	0.00270471346735176
Growth failure	hsa05010	Alzheimer's disease	0.000649270848900124	NDUFA1, NDUFB3, NDUFB9, NDUFS1, NDUFS2, NDUFS3, NDUFV1, NDUFS4, NDUFS6, NDUFV2, NDUFA11	0.00270529520375052
Growth failure	hsa03450	Non-homologous end-joining	0.00215233911571188	LIG4, XRCC4, NHEJ1	0.00768692541325673
Growth failure	hsa05216	Thyroid cancer	0.0028233512629242	BRAF, KRAS, MYC, PAX8	0.00882297269663812
Growth failure	hsa00400	Phenylalanine, tyrosine and tryptophan biosynthesis	0.00411369452980035	PAH, TAT	0.0113930888856385
Growth failure	hsa04630	Jak-STAT signaling pathway	0.00474731739484136	CSF2, CSH1, GH1, GHR, IL2RG, IL6, MYC, STAT5B, IL21	0.0113930888856385
Growth failure	hsa05110	Vibrio cholerae infection	0.00501295910968096	ACTB, ACTG1, GNAS, TCIRG1, ATP6V0A4	0.0113930888856385
Growth failure	hsa05219	Bladder cancer	0.0108166081301811	BRAF, FGFR3, KRAS, MYC	0.0225346002712106
Growth failure	hsa04142	Lysosome	0.0126264200837793	AP1S1, CTNS, LIPA, MAN2B1, TCIRG1, SLC17A5, ATP6V0A4	0.0242815770841909
Growth failure	hsa04730	Long-term depression	0.0147596173435671	BRAF, GNAS, IGF1, IGF1R, KRAS	0.0263564595420841
Growth failure	hsa04122	Sulfur relay system	0.0172931335588695	MOCS1, MOCS2	0.0288218892647826
Growth failure	hsa00260	Glycine, serine and threonine metabolism	0.0280401663264901	SDS, PHGDH, GLYCTK	0.0418425346845544
Growth failure	hsa05410	Hypertrophic cardiomyopathy (HCM)	0.0286564639685521	ACTB, ACTG1, IGF1, IL6, LMNA	0.0418425346845544
Growth failure	hsa05221	Acute myeloid leukemia	0.0301266249728792	BRAF, KRAS, MYC, STAT5B	0.0418425346845544
Growth failure	hsa04621	NOD-like receptor signaling pathway	0.0318544429051319	IL6, NLRP1, NOD2, NLRP3	0.0419137406646472
Growth failure	hsa05414	Dilated cardiomyopathy	0.0387302794653314	ACTB, ACTG1, GNAS, IGF1, LMNA	0.0462269159752991
Growth failure	hsa05323	Rheumatoid arthritis	0.0403254050238183	CSF2, IL6, TNFSF11, TCIRG1, ATP6V0A4	0.0462269159752991
Growth failure	hsa00780	Biotin metabolism	0.041145735516282	HLCS	0.0462269159752991
Growth failure	hsa00770	Pantothenate and CoA biosynthesis	0.0425287626972752	DPYD, DPYS	0.0462269159752991
Growth failure	hsa05214	Glioma	0.0455595766871855	BRAF, IGF1, IGF1R, KRAS	0.0474578923824849
Growth failure	hsa00360	Phenylalanine metabolism	0.047557107377962	PAH, TAT	0.047557107377962
Thoracic aorta calcification	hsa04320	Dorso-ventral axis formation	0.00816253713926518	NOTCH1	0.0212714399974695
Thoracic aorta calcification	hsa05020	Prion diseases	0.011892520903159	NOTCH1	0.0212714399974695
Thoracic aorta calcification	hsa04330	Notch signaling pathway	0.0159535799981021	NOTCH1	0.0212714399974695
Thoracic aorta calcification	hsa04350	TGF-beta signaling pathway	0.0284225355155384	SMAD6	0.0284225355155384
Patent or persistent ostium secundum defect (type II)	hsa04722	Neurotrophin signaling pathway	0.0216391208042256	NTF3	0.0432782416084512
Patent or persistent ostium secundum defect (type II)	hsa04010	MAPK signaling pathway	0.0456636565002557	NTF3	0.0456636565002557
Patent or persistent sinus venosus defect	hsa04722	Neurotrophin signaling pathway	0.0216391208042256	NTF3	0.0432782416084512
Patent or persistent sinus venosus defect	hsa04010	MAPK signaling pathway	0.0456636565002557	NTF3	0.0456636565002557
HYPOPLASTIC LEFT HEART SYNDROME 2	hsa00510	N-Glycan biosynthesis	0.0166296101557486	MGAT4A	0.0355708531987242
HYPOPLASTIC LEFT HEART SYNDROME 2	hsa05416	Viral myocarditis	0.0237139021324828	MYH7B	0.0355708531987242
HYPOPLASTIC LEFT HEART SYNDROME 2	hsa04530	Tight junction	0.0444800084740419	MYH7B	0.0444800084740419
Discordant ventriculoarterial connection	hsa04150	mTOR signaling pathway	0.00266398111197715	HIF1A, TSC1	0.00799194333593145
Discordant ventriculoarterial connection	hsa00563	Glycosylphosphatidylinositol(GPI)-anchor biosynthesis	0.0377155393363416	PIGL	0.048046717692057
Discordant ventriculoarterial connection	hsa00260	Glycine, serine and threonine metabolism	0.048046717692057	PHGDH	0.048046717692057
Hospital acquired pneumonia	hsa05323	Rheumatoid arthritis	0.00474709709325033	TNF, IL23A	0.0356898619609231
Hospital acquired pneumonia	hsa00061	Fatty acid biosynthesis	0.00713797239218461	ACACA	0.0356898619609231
Hospital acquired pneumonia	hsa05310	Asthma	0.0352549249322827	TNF	0.0490555435097548
Hospital acquired pneumonia	hsa04060	Cytokine-cytokine receptor interaction	0.0366972321252167	TNF, IL23A	0.0490555435097548
Hospital acquired pneumonia	hsa00640	Propanoate metabolism	0.037566877396557	ACACA	0.0490555435097548
Hospital acquired pneumonia	hsa05143	African trypanosomiasis	0.0410259012878366	TNF	0.0490555435097548
Hospital acquired pneumonia	hsa05330	Allograft rejection	0.0433259925415025	TNF	0.0490555435097548
Hospital acquired pneumonia	hsa00620	Pyruvate metabolism	0.0467672627127785	ACACA	0.0490555435097548
Hospital acquired pneumonia	hsa05332	Graft-versus-host disease	0.0479119923681243	TNF	0.0490555435097548
Hospital acquired pneumonia	hsa00380	Tryptophan metabolism	0.0490555435097548	CYP1A1	0.0490555435097548
Aortic Valve Disease 1	hsa04320	Dorso-ventral axis formation	0.00816253713926518	NOTCH1	0.0212714399974695
Aortic Valve Disease 1	hsa05020	Prion diseases	0.011892520903159	NOTCH1	0.0212714399974695
Aortic Valve Disease 1	hsa04330	Notch signaling pathway	0.0159535799981021	NOTCH1	0.0212714399974695
Aortic Valve Disease 1	hsa04350	TGF-beta signaling pathway	0.0284225355155384	SMAD6	0.0284225355155384
Athyroidal hypothyroidism	hsa05216	Thyroid cancer	0.00985885540271836	PAX8	0.0176432198431953
Athyroidal hypothyroidism	hsa05320	Autoimmune thyroid disease	0.0176432198431953	TSHR	0.0176432198431953
Abnormality of cardiovascular system morphology	hsa05200	Pathways in cancer	6.07606242826468e-06	DVL1, FGFR1, FGFR2, KRAS, PIK3CA, RARB, RB1, RET, FGF20	0.00015772955515819
Abnormality of cardiovascular system morphology	hsa05218	Melanoma	1.21330427044762e-05	FGFR1, KRAS, PIK3CA, RB1, FGF20	0.00015772955515819
Abnormality of cardiovascular system morphology	hsa04810	Regulation of actin cytoskeleton	2.74321399836447e-05	FGFR1, FGFR2, KRAS, PIK3CA, ITGA8, WASF2, FGF20	0.000237745213191587
Abnormality of cardiovascular system morphology	hsa05215	Prostate cancer	3.6645867670185e-05	FGFR1, FGFR2, KRAS, PIK3CA, RB1	0.000238198139856202
Abnormality of cardiovascular system morphology	hsa05223	Non-small cell lung cancer	8.2373624478688e-05	KRAS, PIK3CA, RARB, RB1	0.000428342847289177
Abnormality of cardiovascular system morphology	hsa05220	Chronic myeloid leukemia	0.000267755984158275	KRAS, PIK3CA, PTPN11, RB1	0.00116027593135253
Abnormality of cardiovascular system morphology	hsa05214	Glioma	0.00281058103023388	KRAS, PIK3CA, RB1	0.0100272491381986
Abnormality of cardiovascular system morphology	hsa05211	Renal cell carcinoma	0.00347097085553028	KRAS, PIK3CA, PTPN11	0.0100272491381986
Abnormality of cardiovascular system morphology	hsa05212	Pancreatic cancer	0.00347097085553028	KRAS, PIK3CA, RB1	0.0100272491381986
Abnormality of cardiovascular system morphology	hsa04010	MAPK signaling pathway	0.00570980127921767	FGFR1, FGFR2, FLNA, KRAS, FGF20	0.014166568140767
Abnormality of cardiovascular system morphology	hsa05222	Small cell lung cancer	0.00599354805955527	PIK3CA, RARB, RB1	0.014166568140767
Abnormality of cardiovascular system morphology	hsa05216	Thyroid cancer	0.00711957328346981	KRAS, RET	0.0154257421141846
Abnormality of cardiovascular system morphology	hsa05219	Bladder cancer	0.0145755618235812	KRAS, RB1	0.0270689005295079
Abnormality of cardiovascular system morphology	hsa04960	Aldosterone-regulated sodium reabsorption	0.0145755618235812	KRAS, PIK3CA	0.0270689005295079
Abnormality of cardiovascular system morphology	hsa04722	Neurotrophin signaling pathway	0.0178925638156645	KRAS, PIK3CA, PTPN11	0.0310137772804852
Abnormality of cardiovascular system morphology	hsa04650	Natural killer cell mediated cytotoxicity	0.021437084465809	KRAS, PIK3CA, PTPN11	0.031723342128563
Abnormality of cardiovascular system morphology	hsa05213	Endometrial cancer	0.0218485755873883	KRAS, PIK3CA	0.031723342128563
Abnormality of cardiovascular system morphology	hsa00400	Phenylalanine, tyrosine and tryptophan biosynthesis	0.0219623137813129	PAH	0.031723342128563
Abnormality of cardiovascular system morphology	hsa05221	Acute myeloid leukemia	0.0259448711940926	KRAS, PIK3CA	0.0355035079498109
Abnormality of cardiovascular system morphology	hsa04310	Wnt signaling pathway	0.0276702512234312	DVL1, DAAM1, VANGL1	0.0359713265904606
Abnormality of cardiovascular system morphology	hsa05210	Colorectal cancer	0.0303288628993406	KRAS, PIK3CA	0.0375500207325169
Abnormality of cardiovascular system morphology	hsa05100	Bacterial invasion of epithelial cells	0.0379079108622563	PIK3CA, WASF2	0.0448002582917575
Abnormality of cardiovascular system morphology	hsa04520	Adherens junction	0.0409200147142558	FGFR1, WASF2	0.0457813805454205
Abnormality of cardiovascular system morphology	hsa04662	B cell receptor signaling pathway	0.0429773829304585	KRAS, PIK3CA	0.0457813805454205
Abnormality of cardiovascular system morphology	hsa04370	VEGF signaling pathway	0.0440205582167505	KRAS, PIK3CA	0.0457813805454205
Abnormality of cardiovascular system morphology	hsa04664	Fc epsilon RI signaling pathway	0.0472068716384314	KRAS, PIK3CA	0.0472068716384314
Hereditary persistence of fetal hemoglobin thalassemia	hsa05143	African trypanosomiasis	1.06629791149101e-05	HBA1, HBA2, HBB	4.26519164596405e-05
Hereditary persistence of fetal hemoglobin thalassemia	hsa05144	Malaria	3.35810194356579e-05	HBA1, HBA2, HBB	6.71620388713157e-05
Hereditary persistence of fetal hemoglobin thalassemia	hsa04614	Renin-angiotensin system	0.0229525864605037	LNPEP	0.0282857114751294
Hereditary persistence of fetal hemoglobin thalassemia	hsa01040	Biosynthesis of unsaturated fatty acids	0.0282857114751294	HACD1	0.0282857114751294
Stinging Sensation	hsa04614	Renin-angiotensin system	0.0115389938910598	LNPEP	0.0284789499404516
Stinging Sensation	hsa01040	Biosynthesis of unsaturated fatty acids	0.0142394749702258	HACD1	0.0284789499404516
Stinging Sensation	hsa03320	PPAR signaling pathway	0.0468733005382516	SORBS1	0.0488446064659301
Stinging Sensation	hsa04520	Adherens junction	0.0488446064659301	SORBS1	0.0488446064659301
Perry Syndrome	hsa04614	Renin-angiotensin system	0.0201108745648373	LNPEP	0.0247921315985635
Perry Syndrome	hsa01040	Biosynthesis of unsaturated fatty acids	0.0247921315985635	HACD1	0.0247921315985635
Toeing-in	hsa00532	Glycosaminoglycan biosynthesis - chondroitin sulfate / dermatan sulfate	3.00555737114038e-05	CHST3, B3GAT3, B3GALT6	0.000150277868557019
Toeing-in	hsa04146	Peroxisome	0.00139343037142185	PEX1, PEX2, PEX5	0.00348357592855463
Toeing-in	hsa00534	Glycosaminoglycan biosynthesis - heparan sulfate / heparin	0.00246396819357363	B3GAT3, B3GALT6	0.00410661365595605
Toeing-in	hsa03050	Proteasome	0.00695577733750888	PSMB8, PSMB9	0.0086947216718861
Toeing-in	hsa05416	Viral myocarditis	0.0169904194388844	MYH3, MYH8	0.0169904194388844
Pitt-Rogers-Danks Syndrome	hsa00310	Lysine degradation	0.0149390992126086	NSD2	0.0239303699971531
Pitt-Rogers-Danks Syndrome	hsa04330	Notch signaling pathway	0.0159535799981021	CTBP1	0.0239303699971531
Pitt-Rogers-Danks Syndrome	hsa05220	Chronic myeloid leukemia	0.0247238532081322	CTBP1	0.0247238532081322
Atypical Teratoid Rhabdoid Tumor	hsa05213	Endometrial cancer	7.41966352089155e-14	CCND1, BRAF, EGF, MYC, PIK3CA, PIK3CB, PIK3CD, PIK3CG, TP53	3.78402839565469e-12
Atypical Teratoid Rhabdoid Tumor	hsa05215	Prostate cancer	2.13854186738971e-13	CCND1, BCL2, BRAF, EGF, IGF1R, PIK3CA, PIK3CB, PIK3CD, PIK3CG, TP53	5.45328176184376e-12
Atypical Teratoid Rhabdoid Tumor	hsa05210	Colorectal cancer	4.0097651964001e-13	CCND1, BCL2, BRAF, MYC, PIK3CA, PIK3CB, PIK3CD, PIK3CG, TP53	6.81660083388017e-12
Atypical Teratoid Rhabdoid Tumor	hsa05214	Glioma	6.28037159708604e-13	CCND1, BRAF, EGF, IGF1R, PIK3CA, PIK3CB, PIK3CD, PIK3CG, TP53	8.0074737862847e-12
Atypical Teratoid Rhabdoid Tumor	hsa05218	Melanoma	1.44557832422974e-12	CCND1, BRAF, EGF, IGF1R, PIK3CA, PIK3CB, PIK3CD, PIK3CG, TP53	1.47448989071434e-11
Atypical Teratoid Rhabdoid Tumor	hsa05223	Non-small cell lung cancer	8.68083849435355e-12	CCND1, BRAF, EGF, PIK3CA, PIK3CB, PIK3CD, PIK3CG, TP53	7.37871272020052e-11
Atypical Teratoid Rhabdoid Tumor	hsa05212	Pancreatic cancer	7.61117361678105e-11	CCND1, BRAF, EGF, PIK3CA, PIK3CB, PIK3CD, PIK3CG, TP53	5.54528363508334e-10
Atypical Teratoid Rhabdoid Tumor	hsa05220	Chronic myeloid leukemia	1.07681200918543e-10	CCND1, BRAF, MYC, PIK3CA, PIK3CB, PIK3CD, PIK3CG, TP53	6.8646765585571e-10
Atypical Teratoid Rhabdoid Tumor	hsa05222	Small cell lung cancer	3.75717444583945e-10	CCND1, BCL2, MYC, PIK3CA, PIK3CB, PIK3CD, PIK3CG, TP53	2.12906551930902e-09
Atypical Teratoid Rhabdoid Tumor	hsa04012	ErbB signaling pathway	4.54247866162511e-10	BRAF, EGF, MYC, PIK3CA, PIK3CB, PIK3CD, PIK3CG, MAP2K7	2.31666411742881e-09
Atypical Teratoid Rhabdoid Tumor	hsa04510	Focal adhesion	7.64705949550513e-10	CCND1, BCL2, BRAF, EGF, IGF1R, PIK3CA, PIK3CB, PIK3CD, PIK3CG, SPP1	3.54545485700692e-09
Atypical Teratoid Rhabdoid Tumor	hsa05221	Acute myeloid leukemia	8.49764687138014e-10	CCND1, BRAF, MYC, PIK3CA, PIK3CB, PIK3CD, PIK3CG	3.61149992033656e-09
Atypical Teratoid Rhabdoid Tumor	hsa05200	Pathways in cancer	5.35095859046219e-09	CCND1, BCL2, BRAF, EGF, IGF1R, MYC, PIK3CA, PIK3CB, PIK3CD, PIK3CG, TP53	2.09922221625824e-08
Atypical Teratoid Rhabdoid Tumor	hsa04722	Neurotrophin signaling pathway	9.56001189851079e-09	BCL2, BRAF, PIK3CA, PIK3CB, PIK3CD, PIK3CG, MAP2K7, TP53	3.48257576302893e-08
Atypical Teratoid Rhabdoid Tumor	hsa05160	Hepatitis C	1.46388406530178e-08	BRAF, EGF, PIK3CA, PIK3CB, PIK3CD, PIK3CG, TP53, CLDN6	4.97720582202605e-08
Atypical Teratoid Rhabdoid Tumor	hsa04210	Apoptosis	1.75509119282646e-08	ATM, BCL2, PIK3CA, PIK3CB, PIK3CD, PIK3CG, TP53	5.59435317713435e-08
Atypical Teratoid Rhabdoid Tumor	hsa05219	Bladder cancer	3.53554948137373e-07	CCND1, BRAF, EGF, MYC, TP53	1.00173901972256e-06
Atypical Teratoid Rhabdoid Tumor	hsa04960	Aldosterone-regulated sodium reabsorption	3.53554948137373e-07	INSR, PIK3CA, PIK3CB, PIK3CD, PIK3CG	1.00173901972256e-06
Atypical Teratoid Rhabdoid Tumor	hsa04910	Insulin signaling pathway	4.33467215092855e-07	ACACA, BRAF, INSR, PIK3CA, PIK3CB, PIK3CD, PIK3CG	1.16351726156503e-06
Atypical Teratoid Rhabdoid Tumor	hsa04914	Progesterone-mediated oocyte maturation	5.13366451815478e-07	BRAF, IGF1R, PIK3CA, PIK3CB, PIK3CD, PIK3CG	1.30908445212947e-06
Atypical Teratoid Rhabdoid Tumor	hsa04930	Type II diabetes mellitus	7.0138410218692e-07	INSR, PIK3CA, PIK3CB, PIK3CD, PIK3CG	1.70336139102538e-06
Atypical Teratoid Rhabdoid Tumor	hsa04150	mTOR signaling pathway	1.05428625502214e-06	BRAF, PIK3CA, PIK3CB, PIK3CD, PIK3CG	2.44402722755132e-06
Atypical Teratoid Rhabdoid Tumor	hsa04620	Toll-like receptor signaling pathway	1.4157722899681e-06	PIK3CA, PIK3CB, PIK3CD, PIK3CG, MAP2K7, SPP1	3.13932116471187e-06
Atypical Teratoid Rhabdoid Tumor	hsa04670	Leukocyte transendothelial migration	3.0181077979885e-06	PTK2B, PIK3CA, PIK3CB, PIK3CD, PIK3CG, CLDN6	6.41347907072557e-06
Atypical Teratoid Rhabdoid Tumor	hsa05216	Thyroid cancer	3.30820512251448e-06	CCND1, BRAF, MYC, TP53	6.74873844992954e-06
Atypical Teratoid Rhabdoid Tumor	hsa05211	Renal cell carcinoma	4.69963902686238e-06	BRAF, PIK3CA, PIK3CB, PIK3CD, PIK3CG	9.21852270653774e-06
Atypical Teratoid Rhabdoid Tumor	hsa04650	Natural killer cell mediated cytotoxicity	7.62335234731428e-06	BRAF, PTK2B, PIK3CA, PIK3CB, PIK3CD, PIK3CG	1.4399665544927e-05
Atypical Teratoid Rhabdoid Tumor	hsa04664	Fc epsilon RI signaling pathway	8.56196656208704e-06	PIK3CA, PIK3CB, PIK3CD, PIK3CG, MAP2K7	1.55950105238014e-05
Atypical Teratoid Rhabdoid Tumor	hsa04630	Jak-STAT signaling pathway	1.61933422626455e-05	CCND1, MYC, PIK3CA, PIK3CB, PIK3CD, PIK3CG	2.84779467377559e-05
Atypical Teratoid Rhabdoid Tumor	hsa04973	Carbohydrate digestion and absorption	1.82230007244001e-05	PIK3CA, PIK3CB, PIK3CD, PIK3CG	3.09791012314801e-05
Atypical Teratoid Rhabdoid Tumor	hsa04660	T cell receptor signaling pathway	3.94600438333404e-05	PIK3CA, PIK3CB, PIK3CD, PIK3CG, MAP2K7	6.49181366290438e-05
Atypical Teratoid Rhabdoid Tumor	hsa04062	Chemokine signaling pathway	4.99686910822122e-05	BRAF, PTK2B, PIK3CA, PIK3CB, PIK3CD, PIK3CG	7.9366699815889e-05
Atypical Teratoid Rhabdoid Tumor	hsa00562	Inositol phosphate metabolism	5.13549234102812e-05	PIK3CA, PIK3CB, PIK3CD, PIK3CG	7.9366699815889e-05
Atypical Teratoid Rhabdoid Tumor	hsa04380	Osteoclast differentiation	8.91973875260598e-05	PIK3CA, PIK3CB, PIK3CD, PIK3CG, MAP2K7	0.00013379608128909
Atypical Teratoid Rhabdoid Tumor	hsa04810	Regulation of actin cytoskeleton	9.75625254706165e-05	BRAF, EGF, PIK3CA, PIK3CB, PIK3CD, PIK3CG	0.000142162537114327
Atypical Teratoid Rhabdoid Tumor	hsa05145	Toxoplasmosis	0.000103272286650698	BCL2, PIK3CA, PIK3CB, PIK3CD, PIK3CG	0.000146302406088489
Atypical Teratoid Rhabdoid Tumor	hsa05100	Bacterial invasion of epithelial cells	0.000115447481588981	PIK3CA, PIK3CB, PIK3CD, PIK3CG	0.000159130312460487
Atypical Teratoid Rhabdoid Tumor	hsa04662	B cell receptor signaling pathway	0.000151164796840776	PIK3CA, PIK3CB, PIK3CD, PIK3CG	0.0002028790694442
Atypical Teratoid Rhabdoid Tumor	hsa04370	VEGF signaling pathway	0.000159170065781557	PIK3CA, PIK3CB, PIK3CD, PIK3CG	0.000208145470637421
Atypical Teratoid Rhabdoid Tumor	hsa04070	Phosphatidylinositol signaling system	0.000176096736949866	PIK3CA, PIK3CB, PIK3CD, PIK3CG	0.000224523339611079
Atypical Teratoid Rhabdoid Tumor	hsa04666	Fc gamma R-mediated phagocytosis	0.000361909092973397	PIK3CA, PIK3CB, PIK3CD, PIK3CG	0.000450179603454714
Atypical Teratoid Rhabdoid Tumor	hsa05142	Chagas disease (American trypanosomiasis)	0.000532402320515833	PIK3CA, PIK3CB, PIK3CD, PIK3CG	0.00064648853205494
Atypical Teratoid Rhabdoid Tumor	hsa05146	Amoebiasis	0.000572362061553407	PIK3CA, PIK3CB, PIK3CD, PIK3CG	0.000678848026493575
Atypical Teratoid Rhabdoid Tumor	hsa04110	Cell cycle	0.00103392007760305	ATM, CCND1, MYC, TP53	0.00119840736267626
Atypical Teratoid Rhabdoid Tumor	hsa04115	p53 signaling pathway	0.00195696796589453	ATM, CCND1, TP53	0.0022178970280138
Atypical Teratoid Rhabdoid Tumor	hsa04010	MAPK signaling pathway	0.00265403247357489	BRAF, EGF, MYC, MAP2K7, TP53	0.00294251426418086
Atypical Teratoid Rhabdoid Tumor	hsa05014	Amyotrophic lateral sclerosis (ALS)	0.0164682510907867	BCL2, TP53	0.017869804375109
Atypical Teratoid Rhabdoid Tumor	hsa04310	Wnt signaling pathway	0.0176482185368132	CCND1, MYC, TP53	0.018751232195364
Atypical Teratoid Rhabdoid Tumor	hsa00061	Fatty acid biosynthesis	0.0222907434272194	ACACA	0.0232005696895549
Atypical Teratoid Rhabdoid Tumor	hsa04730	Long-term depression	0.0277767438538108	BRAF, IGF1R	0.028332278730887
Atypical Teratoid Rhabdoid Tumor	hsa04520	Adherens junction	0.0300233603690306	IGF1R, INSR	0.0300233603690306
Periventricular cysts	hsa00910	Nitrogen metabolism	0.0155876386312851	GLUL	0.0446781345183818
Periventricular cysts	hsa00250	Alanine, aspartate and glutamate metabolism	0.0216372701471165	GLUL	0.0446781345183818
Periventricular cysts	hsa00310	Lysine degradation	0.0296600197894691	NSD2	0.0446781345183818
Periventricular cysts	hsa04330	Notch signaling pathway	0.0316579738613283	CTBP1	0.0446781345183818
Periventricular cysts	hsa00330	Arginine and proline metabolism	0.0363078673221632	GLUL	0.0446781345183818
Periventricular cysts	hsa00562	Inositol phosphate metabolism	0.0382955438728987	OCRL	0.0446781345183818
Periventricular cysts	hsa05220	Chronic myeloid leukemia	0.0488446064659301	CTBP1	0.0488446064659301
Persistent cavum septum pellucidum	hsa00310	Lysine degradation	0.000326485519964963	NSD2, NSD1	0.00587673935936933
Persistent cavum septum pellucidum	hsa05220	Chronic myeloid leukemia	0.00090098918439255	CTBP1, PIK3CA	0.00810890265953295
Persistent cavum septum pellucidum	hsa05200	Pathways in cancer	0.0171274875471733	CTBP1, PIK3CA	0.0475307426485889
Persistent cavum septum pellucidum	hsa04960	Aldosterone-regulated sodium reabsorption	0.0283263338547531	PIK3CA	0.0475307426485889
Persistent cavum septum pellucidum	hsa04973	Carbohydrate digestion and absorption	0.0296600197894691	PIK3CA	0.0475307426485889
Persistent cavum septum pellucidum	hsa04330	Notch signaling pathway	0.0316579738613283	CTBP1	0.0475307426485889
Persistent cavum septum pellucidum	hsa04930	Type II diabetes mellitus	0.0323232724021314	PIK3CA	0.0475307426485889
Persistent cavum septum pellucidum	hsa04150	mTOR signaling pathway	0.0349810389587348	PIK3CA	0.0475307426485889
Persistent cavum septum pellucidum	hsa05213	Endometrial cancer	0.0349810389587348	PIK3CA	0.0475307426485889
Persistent cavum septum pellucidum	hsa05223	Non-small cell lung cancer	0.0363078673221632	PIK3CA	0.0475307426485889
Persistent cavum septum pellucidum	hsa05221	Acute myeloid leukemia	0.0382955438728987	PIK3CA	0.0475307426485889
Persistent cavum septum pellucidum	hsa00562	Inositol phosphate metabolism	0.0382955438728987	PIK3CA	0.0475307426485889
Persistent cavum septum pellucidum	hsa05210	Colorectal cancer	0.0416015033170906	PIK3CA	0.0475307426485889
Persistent cavum septum pellucidum	hsa05214	Glioma	0.0435809832740012	PIK3CA	0.0475307426485889
Persistent cavum septum pellucidum	hsa05100	Bacterial invasion of epithelial cells	0.0468733005382516	PIK3CA	0.0475307426485889
Persistent cavum septum pellucidum	hsa05211	Renal cell carcinoma	0.0468733005382516	PIK3CA	0.0475307426485889
Persistent cavum septum pellucidum	hsa05212	Pancreatic cancer	0.0468733005382516	PIK3CA	0.0475307426485889
Persistent cavum septum pellucidum	hsa05218	Melanoma	0.0475307426485889	PIK3CA	0.0475307426485889
Hyperconvex fingernails	hsa00310	Lysine degradation	0.0296600197894691	NSD2	0.0488446064659301
Hyperconvex fingernails	hsa04330	Notch signaling pathway	0.0316579738613283	CTBP1	0.0488446064659301
Hyperconvex fingernails	hsa04150	mTOR signaling pathway	0.0349810389587348	RPS6KA3	0.0488446064659301
Hyperconvex fingernails	hsa04720	Long-term potentiation	0.0468733005382516	RPS6KA3	0.0488446064659301
Hyperconvex fingernails	hsa05220	Chronic myeloid leukemia	0.0488446064659301	CTBP1	0.0488446064659301
Abnormal sternal ossification	hsa00310	Lysine degradation	0.0149390992126086	NSD2	0.0239303699971531
Abnormal sternal ossification	hsa04330	Notch signaling pathway	0.0159535799981021	CTBP1	0.0239303699971531
Abnormal sternal ossification	hsa05220	Chronic myeloid leukemia	0.0247238532081322	CTBP1	0.0247238532081322
Malrotation of small bowel	hsa04310	Wnt signaling pathway	0.00191416260755273	CTBP1, WNT4	0.0133991382528691
Malrotation of small bowel	hsa05200	Pathways in cancer	0.00888949766432845	CTBP1, WNT4	0.0311132418251496
Malrotation of small bowel	hsa00310	Lysine degradation	0.022326636222093	NSD2	0.0330837542514186
Malrotation of small bowel	hsa04330	Notch signaling pathway	0.0238366858000604	CTBP1	0.0330837542514186
Malrotation of small bowel	hsa05217	Basal cell carcinoma	0.0278558812917985	WNT4	0.0330837542514186
Malrotation of small bowel	hsa04340	Hedgehog signaling pathway	0.0283575036440731	WNT4	0.0330837542514186
Malrotation of small bowel	hsa05220	Chronic myeloid leukemia	0.0368587021455459	CTBP1	0.0368587021455459
Prominent glabella	hsa00310	Lysine degradation	0.0149390992126086	NSD2	0.0239303699971531
Prominent glabella	hsa04330	Notch signaling pathway	0.0159535799981021	CTBP1	0.0239303699971531
Prominent glabella	hsa05220	Chronic myeloid leukemia	0.0247238532081322	CTBP1	0.0247238532081322
Pseudoepiphyses of the metacarpals	hsa00310	Lysine degradation	0.022326636222093	NSD2	0.043326055017696
Pseudoepiphyses of the metacarpals	hsa04330	Notch signaling pathway	0.0238366858000604	CTBP1	0.043326055017696
Pseudoepiphyses of the metacarpals	hsa04150	mTOR signaling pathway	0.0263499784196662	RPS6KA3	0.043326055017696
Pseudoepiphyses of the metacarpals	hsa04720	Long-term potentiation	0.0353621085157666	RPS6KA3	0.043326055017696
Pseudoepiphyses of the metacarpals	hsa05220	Chronic myeloid leukemia	0.0368587021455459	CTBP1	0.043326055017696
Pseudoepiphyses of the metacarpals	hsa04914	Progesterone-mediated oocyte maturation	0.043326055017696	RPS6KA3	0.043326055017696
Rib segmentation abnormalities	hsa04330	Notch signaling pathway	1.91517211431883e-06	CTBP1, LFNG, DLL3	7.66068845727531e-06
Rib segmentation abnormalities	hsa00310	Lysine degradation	0.0296600197894691	NSD2	0.0413231097655986
Rib segmentation abnormalities	hsa00514	Other types of O-glycan biosynthesis	0.030992332324199	LFNG	0.0413231097655986
Rib segmentation abnormalities	hsa05220	Chronic myeloid leukemia	0.0488446064659301	CTBP1	0.0488446064659301
Craniofacial asymmetry	hsa00740	Riboflavin metabolism	0.00561318649467046	ENPP1	0.0285129215120212
Craniofacial asymmetry	hsa00770	Pantothenate and CoA biosynthesis	0.00815767561931091	ENPP1	0.0285129215120212
Craniofacial asymmetry	hsa00760	Nicotinate and nicotinamide metabolism	0.0122198235051519	ENPP1	0.0285129215120212
Craniofacial asymmetry	hsa00310	Lysine degradation	0.022326636222093	NSD2	0.0319131007106749
Craniofacial asymmetry	hsa04330	Notch signaling pathway	0.0238366858000604	CTBP1	0.0319131007106749
Craniofacial asymmetry	hsa00500	Starch and sucrose metabolism	0.0273540863234356	ENPP1	0.0319131007106749
Craniofacial asymmetry	hsa05220	Chronic myeloid leukemia	0.0368587021455459	CTBP1	0.0368587021455459
Metatarsus Varus	hsa00532	Glycosaminoglycan biosynthesis - chondroitin sulfate / dermatan sulfate	2.02087468073554e-05	CHST3, B3GAT3, B3GALT6	0.000141461227651488
Metatarsus Varus	hsa04146	Peroxisome	0.000950632787421329	PEX1, PEX2, PEX5	0.00332721475597465
Metatarsus Varus	hsa00534	Glycosaminoglycan biosynthesis - heparan sulfate / heparin	0.00191271616900361	B3GAT3, B3GALT6	0.00446300439434176
Metatarsus Varus	hsa05416	Viral myocarditis	0.0133202868391784	MYH3, MYH8	0.0233105019685623
Metatarsus Varus	hsa04530	Tight junction	0.04353697112545	MYH3, MYH8	0.0475305131383728
Metatarsus Varus	hsa00531	Glycosaminoglycan degradation	0.0475305131383728	GUSB	0.0475305131383728
Metatarsus Varus	hsa00100	Steroid biosynthesis	0.0475305131383728	DHCR7	0.0475305131383728
Poor growth	hsa00190	Oxidative phosphorylation	2.48360760356799e-07	NDUFA1, NDUFB3, NDUFB9, NDUFS1, NDUFS2, NDUFS3, NDUFV1, NDUFS4, NDUFS6, NDUFV2, TCIRG1, ATP6V0A4, NDUFA11	3.97377216570878e-06
Poor growth	hsa05012	Parkinson's disease	1.50523972503392e-06	NDUFA1, NDUFB3, NDUFB9, NDUFS1, NDUFS2, NDUFS3, NDUFV1, NDUFS4, NDUFS6, NDUFV2, HTRA2, NDUFA11	1.20419178002714e-05
Poor growth	hsa01100	Metabolic pathways	2.26859734991475e-06	ACACA, ADSL, ALOX12B, CYP11B2, CYP19A1, CYP27B1, DGUOK, DPYD, DPYS, HADH, HLCS, NDST1, NDUFA1, NDUFB3, NDUFB9, NDUFS1, NDUFS2, NDUFS3, NDUFV1, NDUFS4, NDUFS6, NDUFV2, PAFAH1B1, PAH, PRPS1, SPR, TAT, SUCLG1, TCIRG1, FTCD, LIAS, PHGDH, ATP6V0A4, AGK, PIGO, PIGY, CYP2R1, NDUFA11, GLYCTK	1.2099185866212e-05
Poor growth	hsa05016	Huntington's disease	5.08570701452026e-05	NDUFA1, NDUFB3, NDUFB9, NDUFS1, NDUFS2, NDUFS3, NDUFV1, NDUFS4, NDUFS6, NDUFV2, SIN3A, NDUFA11	0.000203428280580811
Poor growth	hsa05010	Alzheimer's disease	0.000102631977157408	NDUFA1, NDUFB3, NDUFB9, NDUFS1, NDUFS2, NDUFS3, NDUFV1, NDUFS4, NDUFS6, NDUFV2, NDUFA11	0.000328422326903705
Poor growth	hsa03450	Non-homologous end-joining	0.00117777701361603	LIG4, XRCC4, NHEJ1	0.00314073870297607
Poor growth	hsa05110	Vibrio cholerae infection	0.00202863836847008	ACTB, ACTG1, GNAS, TCIRG1, ATP6V0A4	0.00463688769936018
Poor growth	hsa00400	Phenylalanine, tyrosine and tryptophan biosynthesis	0.00272511739545471	PAH, TAT	0.00545023479090942
Poor growth	hsa00100	Steroid biosynthesis	0.00370788634621921	CYP27B1, LIPA, CYP2R1	0.00659179794883416
Poor growth	hsa04142	Lysosome	0.00413351812568283	AP1S1, CTNS, LIPA, MAN2B1, TCIRG1, SLC17A5, ATP6V0A4	0.00661362900109254
Poor growth	hsa04122	Sulfur relay system	0.0116060617103397	MOCS1, MOCS2	0.0165071263568673
Poor growth	hsa05216	Thyroid cancer	0.0123803447676505	BRAF, KRAS, PAX8	0.0165071263568673
Poor growth	hsa00770	Pantothenate and CoA biosynthesis	0.0289844373735549	DPYD, DPYS	0.0356731536905291
Poor growth	hsa00360	Phenylalanine metabolism	0.0324935073724593	PAH, TAT	0.0356851935283683
Poor growth	hsa00780	Biotin metabolism	0.0334548689328453	HLCS	0.0356851935283683
Poor growth	hsa00785	Lipoic acid metabolism	0.0497643913421942	LIAS	0.0497643913421942
Abdominal obesity metabolic syndrome	hsa04920	Adipocytokine signaling pathway	0.000118908753469697	LEP, PPARA, PPARGC1A	0.000832361274287877
Abdominal obesity metabolic syndrome	hsa03320	PPAR signaling pathway	0.00478271467397211	PPARA, PPARG	0.0167395013589024
Abdominal obesity metabolic syndrome	hsa04910	Insulin signaling pathway	0.0177323158363917	PRKCI, PPARGC1A	0.0386509452016675
Abdominal obesity metabolic syndrome	hsa04630	Jak-STAT signaling pathway	0.0220862544009528	CTF1, LEP	0.0386509452016675
Abdominal obesity metabolic syndrome	hsa05016	Huntington's disease	0.0301353451389499	PPARG, PPARGC1A	0.0421894831945298
Abdominal obesity metabolic syndrome	hsa05216	Thyroid cancer	0.0436312051924872	PPARG	0.0495145229928571
Abdominal obesity metabolic syndrome	hsa03410	Base excision repair	0.0495145229928571	NEIL1	0.0495145229928571
Tendinitis	hsa05219	Bladder cancer	0.000297285792871044	MMP1, TP53	0.00505385847880775
Tendinitis	hsa04310	Wnt signaling pathway	0.00376407289789034	LRP5, TP53	0.0319946196320679
Tendinitis	hsa05200	Pathways in cancer	0.0171274875471733	MMP1, TP53	0.0488446064659301
Tendinitis	hsa05216	Thyroid cancer	0.0196238334623628	TP53	0.0488446064659301
Tendinitis	hsa05213	Endometrial cancer	0.0349810389587348	TP53	0.0488446064659301
Tendinitis	hsa05014	Amyotrophic lateral sclerosis (ALS)	0.0356446242852203	TP53	0.0488446064659301
Tendinitis	hsa05223	Non-small cell lung cancer	0.0363078673221632	TP53	0.0488446064659301
Tendinitis	hsa05217	Basal cell carcinoma	0.0369707681872896	TP53	0.0488446064659301
Tendinitis	hsa04621	NOD-like receptor signaling pathway	0.0389574189287328	NOD2	0.0488446064659301
Tendinitis	hsa05131	Shigellosis	0.0409409943600382	NOD2	0.0488446064659301
Tendinitis	hsa05210	Colorectal cancer	0.0416015033170906	TP53	0.0488446064659301
Tendinitis	hsa05214	Glioma	0.0435809832740012	TP53	0.0488446064659301
Tendinitis	hsa04115	p53 signaling pathway	0.0455573953273322	TP53	0.0488446064659301
Tendinitis	hsa03320	PPAR signaling pathway	0.0468733005382516	MMP1	0.0488446064659301
Tendinitis	hsa05212	Pancreatic cancer	0.0468733005382516	TP53	0.0488446064659301
Tendinitis	hsa05218	Melanoma	0.0475307426485889	TP53	0.0488446064659301
Tendinitis	hsa05220	Chronic myeloid leukemia	0.0488446064659301	TP53	0.0488446064659301
Chronic glomerulonephritis	hsa04060	Cytokine-cytokine receptor interaction	4.38250869838031e-10	EDA, EGF, IL6, LTA, CCL2, TGFB1, TGFB2, TGFB3, TNF, VEGFA	1.4024027834817e-08
Chronic glomerulonephritis	hsa05323	Rheumatoid arthritis	2.92609873514032e-09	IL6, CCL2, TGFB1, TGFB2, TGFB3, TNF, VEGFA	3.90511606207177e-08
Chronic glomerulonephritis	hsa05144	Malaria	3.66104630819228e-09	IL6, CCL2, TGFB1, TGFB2, TGFB3, TNF	3.90511606207177e-08
Chronic glomerulonephritis	hsa05142	Chagas disease (American trypanosomiasis)	7.53039335262291e-09	IL6, SERPINE1, CCL2, TGFB1, TGFB2, TGFB3, TNF	6.02431468209833e-08
Chronic glomerulonephritis	hsa05146	Amoebiasis	3.1717182341031e-07	FN1, IL6, TGFB1, TGFB2, TGFB3, TNF	2.02989966982599e-06
Chronic glomerulonephritis	hsa05211	Renal cell carcinoma	1.15668215622495e-06	HIF1A, TGFB1, TGFB2, TGFB3, VEGFA	5.2088390565895e-06
Chronic glomerulonephritis	hsa05212	Pancreatic cancer	1.15668215622495e-06	EGF, TGFB1, TGFB2, TGFB3, VEGFA	5.2088390565895e-06
Chronic glomerulonephritis	hsa05200	Pathways in cancer	1.30220976414738e-06	EGF, FN1, HIF1A, IL6, TGFB1, TGFB2, TGFB3, VEGFA	5.2088390565895e-06
Chronic glomerulonephritis	hsa05410	Hypertrophic cardiomyopathy (HCM)	2.71350578435923e-06	IL6, TGFB1, TGFB2, TGFB3, TNF	9.64802056661058e-06
Chronic glomerulonephritis	hsa05140	Leishmaniasis	4.39309953413566e-05	TGFB1, TGFB2, TGFB3, TNF	0.000140579185092341
Chronic glomerulonephritis	hsa04010	MAPK signaling pathway	6.92989993038717e-05	EGF, TGFB1, TGFB2, TGFB3, TNF, GADD45G	0.00020159708888399
Chronic glomerulonephritis	hsa04350	TGF-beta signaling pathway	8.06481883773766e-05	TGFB1, TGFB2, TGFB3, TNF	0.000215061835673004
Chronic glomerulonephritis	hsa05414	Dilated cardiomyopathy	0.000105662957299955	TGFB1, TGFB2, TGFB3, TNF	0.000260093433353736
Chronic glomerulonephritis	hsa04110	Cell cycle	0.000365070332294185	TGFB1, TGFB2, TGFB3, GADD45G	0.00083444647381528
Chronic glomerulonephritis	hsa05145	Toxoplasmosis	0.00046351810589271	TGFB1, TGFB2, TGFB3, TNF	0.000988838625904447
Chronic glomerulonephritis	hsa04621	NOD-like receptor signaling pathway	0.00056457016867979	IL6, CCL2, TNF	0.00112914033735958
Chronic glomerulonephritis	hsa05210	Colorectal cancer	0.000687044757622719	TGFB1, TGFB2, TGFB3	0.001293260720231
Chronic glomerulonephritis	hsa05220	Chronic myeloid leukemia	0.00110779540036005	TGFB1, TGFB2, TGFB3	0.00196941404508454
Chronic glomerulonephritis	hsa04144	Endocytosis	0.00223713914357806	EGF, TGFB1, TGFB2, TGFB3	0.00376781329444726
Chronic glomerulonephritis	hsa05143	African trypanosomiasis	0.00444239697730591	IL6, TNF	0.00710783516368946
Chronic glomerulonephritis	hsa04380	Osteoclast differentiation	0.00550916200555443	TGFB1, TGFB2, TNF	0.00839491353227341
Chronic glomerulonephritis	hsa05332	Graft-versus-host disease	0.00606014564174445	IL6, TNF	0.00881475729708284
Chronic glomerulonephritis	hsa05219	Bladder cancer	0.00635234486096089	EGF, VEGFA	0.00883804502394559
Chronic glomerulonephritis	hsa04940	Type I diabetes mellitus	0.00665090035832016	LTA, TNF	0.00886786714442687
Chronic glomerulonephritis	hsa04672	Intestinal immune network for IgA production	0.00823780861571832	IL6, TGFB1	0.0105443950281194
Chronic glomerulonephritis	hsa04150	mTOR signaling pathway	0.00961823299849016	HIF1A, VEGFA	0.011837825228911
Chronic glomerulonephritis	hsa04115	p53 signaling pathway	0.0160810133725255	SERPINE1, GADD45G	0.0188948412788801
Chronic glomerulonephritis	hsa04610	Complement and coagulation cascades	0.0165329861190201	CFH, SERPINE1	0.0188948412788801
Chronic glomerulonephritis	hsa04510	Focal adhesion	0.0186271828820553	EGF, FN1, VEGFA	0.0205541328353713
Chronic glomerulonephritis	hsa04810	Regulation of actin cytoskeleton	0.0220022721540786	EGF, FN1, MYH9	0.0234690902976838
Chronic glomerulonephritis	hsa04640	Hematopoietic cell lineage	0.0261226621957172	IL6, TNF	0.0269653287181597
Chronic glomerulonephritis	hsa04620	Toll-like receptor signaling pathway	0.0343284950332101	IL6, TNF	0.0343284950332101
Pulmonary congestion	hsa04621	NOD-like receptor signaling pathway	9.16263894225351e-07	IL1B, NFKB1, TNF	3.54200017186932e-05
Pulmonary congestion	hsa05140	Leishmaniasis	1.77100008593466e-06	IL1B, NFKB1, TNF	3.54200017186932e-05
Pulmonary congestion	hsa04210	Apoptosis	3.14750426070831e-06	IL1B, NFKB1, TNF	3.81915198500465e-05
Pulmonary congestion	hsa04620	Toll-like receptor signaling pathway	5.09860353378573e-06	IL1B, NFKB1, TNF	3.81915198500465e-05
Pulmonary congestion	hsa05142	Chagas disease (American trypanosomiasis)	5.40754861919928e-06	IL1B, NFKB1, TNF	3.81915198500465e-05
Pulmonary congestion	hsa05146	Amoebiasis	5.72872797750697e-06	IL1B, NFKB1, TNF	3.81915198500465e-05
Pulmonary congestion	hsa04380	Osteoclast differentiation	1.01371047172373e-05	IL1B, NFKB1, TNF	5.79263126699274e-05
Pulmonary congestion	hsa04010	MAPK signaling pathway	9.42014069183752e-05	IL1B, NFKB1, TNF	0.00045898649853651
Pulmonary congestion	hsa05143	African trypanosomiasis	0.000103271962170715	IL1B, TNF	0.00045898649853651
Pulmonary congestion	hsa05332	Graft-versus-host disease	0.000142226985774553	IL1B, TNF	0.000568907943098213
Pulmonary congestion	hsa04940	Type I diabetes mellitus	0.000156587379311742	IL1B, TNF	0.000569408652042697
Pulmonary congestion	hsa05144	Malaria	0.000220893212009534	IL1B, TNF	0.000736310706698447
Pulmonary congestion	hsa04623	Cytosolic DNA-sensing pathway	0.000266651916694684	IL1B, NFKB1	0.000820467435983642
Pulmonary congestion	hsa04920	Adipocytokine signaling pathway	0.000393895897282119	NFKB1, TNF	0.00112541684937748
Pulmonary congestion	hsa04622	RIG-I-like receptor signaling pathway	0.000429541312509403	NFKB1, TNF	0.00114544350002508
Pulmonary congestion	hsa04640	Hematopoietic cell lineage	0.000660395479462368	IL1B, TNF	0.00165098869865592
Pulmonary congestion	hsa05323	Rheumatoid arthritis	0.000706214345887527	IL1B, TNF	0.001661680813853
Pulmonary congestion	hsa04660	T cell receptor signaling pathway	0.000994516144736019	NFKB1, TNF	0.00221003587719115
Pulmonary congestion	hsa05145	Toxoplasmosis	0.00148405180745701	NFKB1, TNF	0.00305837039652411
Pulmonary congestion	hsa05160	Hepatitis C	0.00152918519826205	NFKB1, TNF	0.00305837039652411
Pulmonary congestion	hsa05010	Alzheimer's disease	0.00236958199068402	IL1B, TNF	0.0045134895060648
Pulmonary congestion	hsa04060	Cytokine-cytokine receptor interaction	0.00591207874931453	IL1B, TNF	0.0107492340896628
Pulmonary congestion	hsa05310	Asthma	0.0152591450496953	TNF	0.0265376435646874
Pulmonary congestion	hsa05020	Prion diseases	0.0177871453736534	IL1B	0.0296452422894224
Pulmonary congestion	hsa05330	Allograft rejection	0.0187971328254781	TNF	0.030075412520765
Pulmonary congestion	hsa04930	Type II diabetes mellitus	0.0243396899124961	TNF	0.0374456767884556
Pulmonary congestion	hsa05014	Amyotrophic lateral sclerosis (ALS)	0.0268521187092897	TNF	0.0397809166063551
Pulmonary congestion	hsa05221	Acute myeloid leukemia	0.0288589534099545	NFKB1	0.041227076299935
Pulmonary congestion	hsa05131	Shigellosis	0.0308630272034426	NFKB1	0.0425696926944036
Pulmonary congestion	hsa05120	Epithelial cell signaling in Helicobacter pylori infection	0.0343635186254103	NFKB1	0.0450837866736503
Pulmonary congestion	hsa05212	Pancreatic cancer	0.0353621085157666	NFKB1	0.0450837866736503
Pulmonary congestion	hsa05220	Chronic myeloid leukemia	0.0368587021455459	NFKB1	0.0450837866736503
Pulmonary congestion	hsa04662	B cell receptor signaling pathway	0.0378555707746683	NFKB1	0.0450837866736503
Pulmonary congestion	hsa04612	Antigen processing and presentation	0.0383537470410951	TNF	0.0450837866736503
Pulmonary congestion	hsa04664	Fc epsilon RI signaling pathway	0.0398472440041747	TNF	0.0450837866736503
Pulmonary congestion	hsa05410	Hypertrophic cardiomyopathy (HCM)	0.0418361667790873	TNF	0.0450837866736503
Pulmonary congestion	hsa04350	TGF-beta signaling pathway	0.0423329679369964	TNF	0.0450837866736503
Pulmonary congestion	hsa05222	Small cell lung cancer	0.0428295973399678	NFKB1	0.0450837866736503
Pulmonary congestion	hsa05215	Prostate cancer	0.0448143979963705	NFKB1	0.0453101690700749
Pulmonary congestion	hsa05414	Dilated cardiomyopathy	0.0453101690700749	TNF	0.0453101690700749
Pancreatitis, Acute Necrotizing	hsa05142	Chagas disease (American trypanosomiasis)	3.24060267524515e-08	IL1B, IL10, SERPINE1, TGFB1, TLR2	6.4812053504903e-07
Pancreatitis, Acute Necrotizing	hsa05144	Malaria	1.73721947350897e-07	IL1B, IL10, TGFB1, TLR2	1.73721947350897e-06
Pancreatitis, Acute Necrotizing	hsa05140	Leishmaniasis	7.09015258665957e-07	IL1B, IL10, TGFB1, TLR2	4.72676839110638e-06
Pancreatitis, Acute Necrotizing	hsa05146	Amoebiasis	3.37578882235696e-06	IL1B, IL10, TGFB1, TLR2	1.68789441117848e-05
Pancreatitis, Acute Necrotizing	hsa05323	Rheumatoid arthritis	0.000120679611064669	IL1B, TGFB1, TLR2	0.000425675745672375
Pancreatitis, Acute Necrotizing	hsa04060	Cytokine-cytokine receptor interaction	0.000127702723701712	GH1, IL1B, IL10, TGFB1	0.000425675745672375
Pancreatitis, Acute Necrotizing	hsa05145	Toxoplasmosis	0.000364366624369581	IL10, TGFB1, TLR2	0.0010410474981988
Pancreatitis, Acute Necrotizing	hsa05143	African trypanosomiasis	0.000712130837513564	IL1B, IL10	0.00178032709378391
Pancreatitis, Acute Necrotizing	hsa04672	Intestinal immune network for IgA production	0.00134009712804794	IL10, TGFB1	0.0029779936178843
Pancreatitis, Acute Necrotizing	hsa05150	Staphylococcus aureus infection	0.00175719985409094	IL10, PLG	0.00351439970818188
Pancreatitis, Acute Necrotizing	hsa04610	Complement and coagulation cascades	0.00275394804697337	SERPINE1, PLG	0.00500717826722431
Pancreatitis, Acute Necrotizing	hsa04620	Toll-like receptor signaling pathway	0.00593384937715398	IL1B, TLR2	0.0098897489619233
Pancreatitis, Acute Necrotizing	hsa04380	Osteoclast differentiation	0.00922510274406429	IL1B, TGFB1	0.0141924657600989
Pancreatitis, Acute Necrotizing	hsa04630	Jak-STAT signaling pathway	0.0133381162530532	GH1, IL10	0.019054451790076
Pancreatitis, Acute Necrotizing	hsa05310	Asthma	0.0352549249322827	IL10	0.0453054152075475
Pancreatitis, Acute Necrotizing	hsa04010	MAPK signaling pathway	0.0374695518633272	IL1B, TGFB1	0.0453054152075475
Pancreatitis, Acute Necrotizing	hsa04080	Neuroactive ligand-receptor interaction	0.0385096029264154	GH1, PLG	0.0453054152075475
Pancreatitis, Acute Necrotizing	hsa05020	Prion diseases	0.0410259012878366	IL1B	0.0455843347642629
Pancreatitis, Acute Necrotizing	hsa05330	Allograft rejection	0.0433259925415025	IL10	0.0456063079384237
Pancreatitis, Acute Necrotizing	hsa05332	Graft-versus-host disease	0.0479119923681243	IL1B	0.0479119923681243
Diffuse malignant mesothelioma	hsa05218	Melanoma	0.0120974612370082	FGF2	0.0362923837110245
Diffuse malignant mesothelioma	hsa04810	Regulation of actin cytoskeleton	0.0362923837110242	FGF2	0.0456636565002557
Diffuse malignant mesothelioma	hsa04010	MAPK signaling pathway	0.0456636565002557	FGF2	0.0456636565002557
Myocardial Failure	hsa04380	Osteoclast differentiation	1.08047619240803e-05	CYBB, IFNG, IL1B, PIK3CG, PPARG, MAP2K7, RAC1, TNF, TNFRSF1A, NOX1	0.000410303185609287
Myocardial Failure	hsa05142	Chagas disease (American trypanosomiasis)	1.34525634625996e-05	ACE, IFNG, IL1B, IL6, NOS2, SERPINE1, PIK3CG, TNF, TNFRSF1A	0.000410303185609287
Myocardial Failure	hsa04020	Calcium signaling pathway	3.35959729046126e-05	ADRB1, ADRB2, ADRB3, AGTR1, ATP2A1, ATP2A2, EDNRA, EDNRB, HTR2B, NOS2, NOS3	0.000683118115727123
Myocardial Failure	hsa03320	PPAR signaling pathway	5.11986178280783e-05	OLR1, PCK1, PDPK1, PPARG, SCD, UCP1, ADIPOQ	0.000780778921878195
Myocardial Failure	hsa04614	Renin-angiotensin system	7.69449550831993e-05	AGT, AGTR1, ACE, REN	0.000915086089353463
Myocardial Failure	hsa05014	Amyotrophic lateral sclerosis (ALS)	9.00084678052587e-05	CAT, RAC1, SOD1, TNF, TNFRSF1A, TP53	0.000915086089353463
Myocardial Failure	hsa05146	Amoebiasis	0.000111587433517998	CSF2, HSPB1, IFNG, IL1B, IL6, NOS2, PIK3CG, TNF	0.00096904920509561
Myocardial Failure	hsa04910	Insulin signaling pathway	0.000127088420340408	ACACA, FASN, GSK3B, INS, PCK1, PDPK1, PIK3CG, PRKAR2B, PPARGC1A	0.00096904920509561
Myocardial Failure	hsa05332	Graft-versus-host disease	0.000251781000974364	HLA-C, IFNG, IL1B, IL6, TNF	0.00160801543628817
Myocardial Failure	hsa04960	Aldosterone-regulated sodium reabsorption	0.000282659206225229	ATP1A3, INS, NR3C2, PDPK1, PIK3CG	0.00160801543628817
Myocardial Failure	hsa04060	Cytokine-cytokine receptor interaction	0.000307889955713208	CCR7, CSF2, CSF3, CXCL2, IFNG, IL1B, IL6, PRL, CCL21, TNF, TNFRSF1A, VEGFA	0.00160801543628817
Myocardial Failure	hsa04940	Type I diabetes mellitus	0.000316330905499313	HLA-C, IFNG, IL1B, INS, TNF	0.00160801543628817
Myocardial Failure	hsa04920	Adipocytokine signaling pathway	0.000362464022172286	PCK1, POMC, TNF, TNFRSF1A, ADIPOQ, PPARGC1A	0.0017007927194238
Myocardial Failure	hsa05140	Leishmaniasis	0.000494648030649318	IFNG, IL1B, ITGB1, NOS2, PTGS2, TNF	0.00215525213354346
Myocardial Failure	hsa04370	VEGF signaling pathway	0.000661723713863944	HSPB1, NOS3, PIK3CG, PTGS2, RAC1, VEGFA	0.00269100976971337
Myocardial Failure	hsa05144	Malaria	0.000706605559565848	CSF3, IFNG, IL1B, IL6, TNF	0.0026939336958448
Myocardial Failure	hsa04150	mTOR signaling pathway	0.000773188787694505	HIF1A, INS, PDPK1, PIK3CG, VEGFA	0.00275677434456566
Myocardial Failure	hsa04146	Peroxisome	0.000813474396757081	CAT, EPHX2, NOS2, SOD1, SOD2, XDH	0.00275677434456566
Myocardial Failure	hsa05410	Hypertrophic cardiomyopathy (HCM)	0.0010561230350303	ATP2A2, ACE, IL6, ITGB1, TNF, TNNT2	0.00339071079667621
Myocardial Failure	hsa04210	Apoptosis	0.00135097089689909	IL1B, PIK3CG, PRKAR2B, TNF, TNFRSF1A, TP53	0.00405151447648357
Myocardial Failure	hsa05143	African trypanosomiasis	0.00139478367223205	IFNG, IL1B, IL6, TNF	0.00405151447648357
Myocardial Failure	hsa05323	Rheumatoid arthritis	0.00170504646262877	CSF2, IFNG, IL1B, IL6, TNF, VEGFA	0.00472762882819794
Myocardial Failure	hsa00061	Fatty acid biosynthesis	0.00285687343550523	ACACA, FASN	0.00757692519851387
Myocardial Failure	hsa04620	Toll-like receptor signaling pathway	0.00304521890885878	IL1B, IL6, PIK3CG, MAP2K7, RAC1, TNF	0.0077399313933494
Myocardial Failure	hsa04660	T cell receptor signaling pathway	0.00404665369471853	CSF2, GSK3B, IFNG, PIK3CG, MAP2K7, TNF	0.00987383501511322
Myocardial Failure	hsa04930	Type II diabetes mellitus	0.00451029045252071	INS, PIK3CG, TNF, ADIPOQ	0.0105818352924524
Myocardial Failure	hsa04080	Neuroactive ligand-receptor interaction	0.00471577339783986	ADRA2C, ADRB1, ADRB2, ADRB3, AGTR1, AVPR2, EDNRA, EDNRB, HTR2B, PRL	0.0106541547136382
Myocardial Failure	hsa04664	Fc epsilon RI signaling pathway	0.00498073545710233	CSF2, PIK3CG, MAP2K7, RAC1, TNF	0.0108508879601158
Myocardial Failure	hsa04145	Phagosome	0.00564583646203806	CYBB, HLA-C, ITGB1, OLR1, RAC1, NOX1, TUBB	0.0118266846066761
Myocardial Failure	hsa05200	Pathways in cancer	0.00581640226557841	GSK3B, HIF1A, IL6, ITGB1, NOS2, PIK3CG, PPARG, PTGS2, RAC1, TP53, VEGFA	0.0118266846066761
Myocardial Failure	hsa05213	Endometrial cancer	0.00601324670013614	GSK3B, PDPK1, PIK3CG, TP53	0.0118325177002679
Myocardial Failure	hsa05222	Small cell lung cancer	0.00678748226857153	ITGB1, NOS2, PIK3CG, PTGS2, TP53	0.0129386380744645
Myocardial Failure	hsa04640	Hematopoietic cell lineage	0.00784444912687166	CSF2, CSF3, IL1B, IL6, TNF	0.0141917062479609
Myocardial Failure	hsa04970	Salivary secretion	0.00822089535225436	ADRB1, ADRB2, ADRB3, ATP1A3, SLC9A1	0.0141917062479609
Myocardial Failure	hsa05215	Prostate cancer	0.00822089535225436	GSK3B, INS, PDPK1, PIK3CG, TP53	0.0141917062479609
Myocardial Failure	hsa00020	Citrate cycle (TCA cycle)	0.00840958533791845	ACLY, CS, PCK1	0.0141917062479609
Myocardial Failure	hsa05414	Dilated cardiomyopathy	0.00860973756183054	ADRB1, ATP2A2, ITGB1, TNF, TNNT2	0.0141917062479609
Myocardial Failure	hsa04621	NOD-like receptor signaling pathway	0.00884073503971337	CXCL2, IL1B, IL6, TNF	0.0141917062479609
Myocardial Failure	hsa05145	Toxoplasmosis	0.0105937450579049	IFNG, ITGB1, NOS2, PIK3CG, TNF, TNFRSF1A	0.0165697038085179
Myocardial Failure	hsa05210	Colorectal cancer	0.0111405447018449	GSK3B, PIK3CG, RAC1, TP53	0.0169893306703135
Myocardial Failure	hsa04650	Natural killer cell mediated cytotoxicity	0.0121619624195561	CSF2, HLA-C, IFNG, PIK3CG, RAC1, TNF	0.0180946270144616
Myocardial Failure	hsa05020	Prion diseases	0.0128887680413044	IL1B, IL6, SOD1	0.0187194012028468
Myocardial Failure	hsa04972	Pancreatic secretion	0.0137599086639401	ATP1A3, ATP2A1, ATP2A2, RAC1, SLC9A1	0.0195198704302406
Myocardial Failure	hsa05016	Huntington's disease	0.0144280570614563	PPARG, SOD1, SOD2, TFAM, TP53, UCP1, PPARGC1A	0.0200025336533826
Myocardial Failure	hsa05330	Allograft rejection	0.0149955827306	HLA-C, IFNG, TNF	0.0203273454792578
Myocardial Failure	hsa04610	Complement and coagulation cascades	0.0160301385234552	CFD, SERPINE1, PLAT, VWF	0.0211218412189595
Myocardial Failure	hsa05211	Renal cell carcinoma	0.0168227098104497	HIF1A, PIK3CG, RAC1, VEGFA	0.0211218412189595
Myocardial Failure	hsa05212	Pancreatic cancer	0.0168227098104497	PIK3CG, RAC1, TP53, VEGFA	0.0211218412189595
Myocardial Failure	hsa04062	Chemokine signaling pathway	0.0169667249135904	GRK2, CCR7, CXCL2, GSK3B, PIK3CG, RAC1, CCL21	0.0211218412189595
Myocardial Failure	hsa04630	Jak-STAT signaling pathway	0.0218868616497489	CSF2, CSF3, IFNG, IL6, PIK3CG, PRL	0.0267019712126937
Myocardial Failure	hsa04510	Focal adhesion	0.0224197196537221	GSK3B, ITGB1, PDPK1, PIK3CG, RAC1, VEGFA, VWF	0.0268157431152362
Myocardial Failure	hsa04260	Cardiac muscle contraction	0.0230594291717452	ATP1A3, ATP2A2, SLC9A1, TNNT2	0.0270504842207011
Myocardial Failure	hsa04670	Leukocyte transendothelial migration	0.0236647888940315	CYBB, ITGB1, PIK3CG, RAC1, NOX1	0.0272368325006778
Myocardial Failure	hsa05010	Alzheimer's disease	0.0301936714326956	ATP2A1, ATP2A2, GSK3B, IL1B, TNF, TNFRSF1A	0.0341076658776747
Myocardial Failure	hsa04722	Neurotrophin signaling pathway	0.0332929889201762	GSK3B, PIK3CG, MAP2K7, RAC1, TP53	0.0369249513478317
Myocardial Failure	hsa04012	ErbB signaling pathway	0.0341395861853799	GSK3B, NRG1, PIK3CG, MAP2K7	0.0371877635233602
Myocardial Failure	hsa01040	Biosynthesis of unsaturated fatty acids	0.0348723833514348	SCD, ELOVL6	0.0373195681480267
Myocardial Failure	hsa00330	Arginine and proline metabolism	0.0403706607303934	GATM, NOS2, NOS3	0.0412089818047192
Myocardial Failure	hsa05223	Non-small cell lung cancer	0.0403706607303934	PDPK1, PIK3CG, TP53	0.0412089818047192
Myocardial Failure	hsa05160	Hepatitis C	0.0405334247259534	GSK3B, PIK3CG, TNF, TNFRSF1A, TP53	0.0412089818047192
Myocardial Failure	hsa04964	Proximal tubule bicarbonate reclamation	0.0412589369277122	ATP1A3, PCK1	0.0412589369277122
Scleroderma-like secondary cutaneous sclerosis	hsa00860	Porphyrin and chlorophyll metabolism	0.000311716399389947	UROD, UROS	0.00155858199694973
Scleroderma-like secondary cutaneous sclerosis	hsa00400	Phenylalanine, tyrosine and tryptophan biosynthesis	0.00340425235522479	PAH	0.00851063088806198
Scleroderma-like secondary cutaneous sclerosis	hsa00360	Phenylalanine metabolism	0.0115389938910598	PAH	0.0192316564850997
Scleroderma-like secondary cutaneous sclerosis	hsa01100	Metabolic pathways	0.0243835936231578	PAH, UROD, UROS	0.0304794920289472
Scleroderma-like secondary cutaneous sclerosis	hsa05412	Arrhythmogenic right ventricular cardiomyopathy (ARVC)	0.0495010284076379	LMNA	0.0495010284076379
Encapsulating Peritoneal Sclerosis	hsa04672	Intestinal immune network for IgA production	0.00817856534332939	TGFB1	0.0263968439126048
Encapsulating Peritoneal Sclerosis	hsa05144	Malaria	0.00868972567728732	TGFB1	0.0263968439126048
Encapsulating Peritoneal Sclerosis	hsa05210	Colorectal cancer	0.0105639802351337	TGFB1	0.0263968439126048
Encapsulating Peritoneal Sclerosis	hsa05211	Renal cell carcinoma	0.011927074459022	TGFB1	0.0263968439126048
Encapsulating Peritoneal Sclerosis	hsa05212	Pancreatic cancer	0.011927074459022	TGFB1	0.0263968439126048
Encapsulating Peritoneal Sclerosis	hsa05140	Leishmaniasis	0.012267848014994	TGFB1	0.0263968439126048
Encapsulating Peritoneal Sclerosis	hsa05220	Chronic myeloid leukemia	0.0124382347929801	TGFB1	0.0263968439126048
Encapsulating Peritoneal Sclerosis	hsa05410	Hypertrophic cardiomyopathy (HCM)	0.0141421025728402	TGFB1	0.0263968439126048
Encapsulating Peritoneal Sclerosis	hsa04350	TGF-beta signaling pathway	0.0143124893508263	TGFB1	0.0263968439126048
Encapsulating Peritoneal Sclerosis	hsa05414	Dilated cardiomyopathy	0.0153348100187426	TGFB1	0.0263968439126048
Encapsulating Peritoneal Sclerosis	hsa05323	Rheumatoid arthritis	0.0155051967967285	TGFB1	0.0263968439126048
Encapsulating Peritoneal Sclerosis	hsa05142	Chagas disease (American trypanosomiasis)	0.0177202249105469	TGFB1	0.0263968439126048
Encapsulating Peritoneal Sclerosis	hsa05146	Amoebiasis	0.0180609984665191	TGFB1	0.0263968439126048
Encapsulating Peritoneal Sclerosis	hsa04110	Cell cycle	0.0211279604702675	TGFB1	0.0267081274493099
Encapsulating Peritoneal Sclerosis	hsa04380	Osteoclast differentiation	0.0218095075822118	TGFB1	0.0267081274493099
Encapsulating Peritoneal Sclerosis	hsa05145	Toxoplasmosis	0.0224910546941557	TGFB1	0.0267081274493099
Encapsulating Peritoneal Sclerosis	hsa04144	Endocytosis	0.0342477423751917	TGFB1	0.0382768885369789
Encapsulating Peritoneal Sclerosis	hsa04060	Cytokine-cytokine receptor interaction	0.0451524961662976	TGFB1	0.0456636565002557
Encapsulating Peritoneal Sclerosis	hsa04010	MAPK signaling pathway	0.0456636565002557	TGFB1	0.0456636565002557
BORNHOLM EYE DISEASE	hsa04540	Gap junction	0.0153348100187426	DRD2	0.0306696200374852
BORNHOLM EYE DISEASE	hsa04080	Neuroactive ligand-receptor interaction	0.0463452036121997	DRD2	0.0463452036121997
Cystathioninuria	hsa04977	Vitamin digestion and absorption	4.79644074917077e-05	MMACHC, LMBRD1	0.000239822037458539
Cystathioninuria	hsa00450	Selenocompound metabolism	0.00866605200289927	CTH	0.0182922256897108
Cystathioninuria	hsa00910	Nitrogen metabolism	0.0117126627094161	CTH	0.0182922256897108
Cystathioninuria	hsa00260	Glycine, serine and threonine metabolism	0.0162708650467921	CTH	0.0182922256897108
Cystathioninuria	hsa00270	Cysteine and methionine metabolism	0.0182922256897108	CTH	0.0182922256897108
Gamma-cystathionase deficiency	hsa00450	Selenocompound metabolism	0.0028965752257627	CTH	0.00613392400749713
Gamma-cystathionase deficiency	hsa00910	Nitrogen metabolism	0.00391889589367878	CTH	0.00613392400749713
Gamma-cystathionase deficiency	hsa00260	Glycine, serine and threonine metabolism	0.00545237689555289	CTH	0.00613392400749713
Gamma-cystathionase deficiency	hsa00270	Cysteine and methionine metabolism	0.00613392400749713	CTH	0.00613392400749713
Cystathionase Deficiency	hsa00450	Selenocompound metabolism	0.0028965752257627	CTH	0.00613392400749713
Cystathionase Deficiency	hsa00910	Nitrogen metabolism	0.00391889589367878	CTH	0.00613392400749713
Cystathionase Deficiency	hsa00260	Glycine, serine and threonine metabolism	0.00545237689555289	CTH	0.00613392400749713
Cystathionase Deficiency	hsa00270	Cysteine and methionine metabolism	0.00613392400749713	CTH	0.00613392400749713
Cellulitis of periorbital region	hsa03022	Basal transcription factors	0.00128192829165055	GTF2I, GTF2IRD1	0.00897349804155386
Cellulitis of periorbital region	hsa05320	Autoimmune thyroid disease	0.00266398111197715	CTLA4, HLA-DPB1	0.00932393389192003
Cellulitis of periorbital region	hsa05323	Rheumatoid arthritis	0.00797515245005287	CTLA4, HLA-DPB1	0.0186086890501234
Cellulitis of periorbital region	hsa05145	Toxoplasmosis	0.0162963933369367	HLA-DPB1, TNFRSF1A	0.023144785188016
Cellulitis of periorbital region	hsa04514	Cell adhesion molecules (CAMs)	0.0165319894200114	CTLA4, HLA-DPB1	0.023144785188016
Cellulitis of periorbital region	hsa03430	Mismatch repair	0.0347455273126085	RFC2	0.0405364485313766
Cellulitis of periorbital region	hsa05310	Asthma	0.0451050612118821	HLA-DPB1	0.0451050612118821
Periorbital edema	hsa03022	Basal transcription factors	0.00128192829165055	GTF2I, GTF2IRD1	0.00897349804155386
Periorbital edema	hsa05320	Autoimmune thyroid disease	0.00266398111197715	CTLA4, HLA-DPB1	0.00932393389192003
Periorbital edema	hsa05323	Rheumatoid arthritis	0.00797515245005287	CTLA4, HLA-DPB1	0.0186086890501234
Periorbital edema	hsa05145	Toxoplasmosis	0.0162963933369367	HLA-DPB1, TNFRSF1A	0.023144785188016
Periorbital edema	hsa04514	Cell adhesion molecules (CAMs)	0.0165319894200114	CTLA4, HLA-DPB1	0.023144785188016
Periorbital edema	hsa03430	Mismatch repair	0.0347455273126085	RFC2	0.0405364485313766
Periorbital edema	hsa05310	Asthma	0.0451050612118821	HLA-DPB1	0.0451050612118821
Chronic infectious disease	hsa05320	Autoimmune thyroid disease	0.000456796802459837	CTLA4, HLA-DPB1	0.00502476482705821
Chronic infectious disease	hsa05323	Rheumatoid arthritis	0.00139816113755153	CTLA4, HLA-DPB1	0.00768988625653344
Chronic infectious disease	hsa04514	Cell adhesion molecules (CAMs)	0.00296829853281708	CTLA4, HLA-DPB1	0.010883761286996
Chronic infectious disease	hsa05310	Asthma	0.0202953239873886	HLA-DPB1	0.0444444995529307
Chronic infectious disease	hsa05330	Allograft rejection	0.0249861042004281	HLA-DPB1	0.0444444995529307
Chronic infectious disease	hsa05332	Graft-versus-host disease	0.0276589755675655	HLA-DPB1	0.0444444995529307
Chronic infectious disease	hsa04940	Type I diabetes mellitus	0.0289933485560712	HLA-DPB1	0.0444444995529307
Chronic infectious disease	hsa04672	Intestinal immune network for IgA production	0.0323232724021314	HLA-DPB1	0.0444444995529307
Chronic infectious disease	hsa05150	Staphylococcus aureus infection	0.0369707681872896	HLA-DPB1	0.0451864944511318
Chronic infectious disease	hsa05416	Viral myocarditis	0.0468733005382516	HLA-DPB1	0.0481878445853614
Chronic infectious disease	hsa05140	Leishmaniasis	0.0481878445853614	HLA-DPB1	0.0481878445853614
Heart Decompensation	hsa04380	Osteoclast differentiation	6.12996261937902e-06	CYBB, IFNG, IL1B, PIK3CG, PPARG, MAP2K7, RAC1, TNF, TNFRSF1A, NOX1	0.000244989384274593
Heart Decompensation	hsa05142	Chagas disease (American trypanosomiasis)	8.03243882867519e-06	ACE, IFNG, IL1B, IL6, NOS2, SERPINE1, PIK3CG, TNF, TNFRSF1A	0.000244989384274593
Heart Decompensation	hsa03320	PPAR signaling pathway	3.41527235485989e-05	OLR1, PCK1, PDPK1, PPARG, SCD, UCP1, ADIPOQ	0.000678731468272538
Heart Decompensation	hsa04614	Renin-angiotensin system	6.02624523897202e-05	AGT, AGTR1, ACE, REN	0.000678731468272538
Heart Decompensation	hsa05014	Amyotrophic lateral sclerosis (ALS)	6.33980894053959e-05	CAT, RAC1, SOD1, TNF, TNFRSF1A, TP53	0.000678731468272538
Heart Decompensation	hsa05146	Amoebiasis	7.14677005857203e-05	CSF2, HSPB1, IFNG, IL1B, IL6, NOS2, PIK3CG, TNF	0.000678731468272538
Heart Decompensation	hsa04910	Insulin signaling pathway	7.78872176706191e-05	ACACA, FASN, GSK3B, INS, PCK1, PDPK1, PIK3CG, PRKAR2B, PPARGC1A	0.000678731468272538
Heart Decompensation	hsa04020	Calcium signaling pathway	0.000102749737052412	ADRB1, ADRB3, AGTR1, ATP2A1, ATP2A2, EDNRA, EDNRB, HTR2B, NOS2, NOS3	0.00078346674502464
Heart Decompensation	hsa04960	Aldosterone-regulated sodium reabsorption	0.000211006994887064	ATP1A3, INS, NR3C2, PDPK1, PIK3CG	0.00143015852090121
Heart Decompensation	hsa04920	Adipocytokine signaling pathway	0.000258093872645282	PCK1, POMC, TNF, TNFRSF1A, ADIPOQ, PPARGC1A	0.00157437262313622
Heart Decompensation	hsa05140	Leishmaniasis	0.000353234059047231	IFNG, IL1B, ITGB1, NOS2, PTGS2, TNF	0.00195884341835283
Heart Decompensation	hsa04370	VEGF signaling pathway	0.000473908203756855	HSPB1, NOS3, PIK3CG, PTGS2, RAC1, VEGFA	0.00237430722886485
Heart Decompensation	hsa05144	Malaria	0.000530831949637173	CSF3, IFNG, IL1B, IL6, TNF	0.00237430722886485
Heart Decompensation	hsa04150	mTOR signaling pathway	0.000581259110406309	HIF1A, INS, PDPK1, PIK3CG, VEGFA	0.00237430722886485
Heart Decompensation	hsa04146	Peroxisome	0.0005838460398848	CAT, EPHX2, NOS2, SOD1, SOD2, XDH	0.00237430722886485
Heart Decompensation	hsa05410	Hypertrophic cardiomyopathy (HCM)	0.000760179488984418	ATP2A2, ACE, IL6, ITGB1, TNF, TNNT2	0.00289818430175309
Heart Decompensation	hsa04210	Apoptosis	0.000975197156248783	IL1B, PIK3CG, PRKAR2B, TNF, TNFRSF1A, TP53	0.00349923685477505
Heart Decompensation	hsa05143	African trypanosomiasis	0.00110578393620028	IFNG, IL1B, IL6, TNF	0.00374737889490093
Heart Decompensation	hsa05323	Rheumatoid arthritis	0.00123431220655087	CSF2, IFNG, IL1B, IL6, TNF, VEGFA	0.00396279182103176
Heart Decompensation	hsa05332	Graft-versus-host disease	0.00201365698555416	IFNG, IL1B, IL6, TNF	0.0061416538059402
Heart Decompensation	hsa04620	Toll-like receptor signaling pathway	0.00222183064215767	IL1B, IL6, PIK3CG, MAP2K7, RAC1, TNF	0.0064223745431191
Heart Decompensation	hsa04940	Type I diabetes mellitus	0.00240516347251572	IFNG, IL1B, INS, TNF	0.0064223745431191
Heart Decompensation	hsa04060	Cytokine-cytokine receptor interaction	0.00247150316479187	CSF2, CSF3, CXCL2, IFNG, IL1B, IL6, PRL, TNF, TNFRSF1A, VEGFA	0.0064223745431191
Heart Decompensation	hsa00061	Fatty acid biosynthesis	0.00252683588581735	ACACA, FASN	0.0064223745431191
Heart Decompensation	hsa04660	T cell receptor signaling pathway	0.00296508235400641	CSF2, GSK3B, IFNG, PIK3CG, MAP2K7, TNF	0.00723480094377564
Heart Decompensation	hsa05200	Pathways in cancer	0.00358833596354173	GSK3B, HIF1A, IL6, ITGB1, NOS2, PIK3CG, PPARG, PTGS2, RAC1, TP53, VEGFA	0.0081490714040863
Heart Decompensation	hsa04930	Type II diabetes mellitus	0.00360696603131689	INS, PIK3CG, TNF, ADIPOQ	0.0081490714040863
Heart Decompensation	hsa04664	Fc epsilon RI signaling pathway	0.0038152045551902	CSF2, PIK3CG, MAP2K7, RAC1, TNF	0.00831169563809294
Heart Decompensation	hsa05213	Endometrial cancer	0.00482168360247037	GSK3B, PDPK1, PIK3CG, TP53	0.0101421620603687
Heart Decompensation	hsa05222	Small cell lung cancer	0.00522061425150576	ITGB1, NOS2, PIK3CG, PTGS2, TP53	0.0106152489780617
Heart Decompensation	hsa04640	Hematopoietic cell lineage	0.00604597975721429	CSF2, CSF3, IL1B, IL6, TNF	0.0118969279093572
Heart Decompensation	hsa05215	Prostate cancer	0.00634044925398778	GSK3B, INS, PDPK1, PIK3CG, TP53	0.0120864813904142
Heart Decompensation	hsa05414	Dilated cardiomyopathy	0.00664488204497023	ADRB1, ATP2A2, ITGB1, TNF, TNNT2	0.0122829637800965
Heart Decompensation	hsa00020	Citrate cycle (TCA cycle)	0.00708343812243396	ACLY, CS, PCK1	0.0124039425774182
Heart Decompensation	hsa04621	NOD-like receptor signaling pathway	0.00711701623294487	CXCL2, IL1B, IL6, TNF	0.0124039425774182
Heart Decompensation	hsa05145	Toxoplasmosis	0.00789444233434497	IFNG, ITGB1, NOS2, PIK3CG, TNF, TNFRSF1A	0.0133766939554179
Heart Decompensation	hsa05210	Colorectal cancer	0.00899201333743988	GSK3B, PIK3CG, RAC1, TP53	0.0148246706374009
Heart Decompensation	hsa04080	Neuroactive ligand-receptor interaction	0.00952506679283142	ADRA2C, ADRB1, ADRB3, AGTR1, AVPR2, EDNRA, EDNRB, HTR2B, PRL	0.0152902387990189
Heart Decompensation	hsa04972	Pancreatic secretion	0.0106993883520639	ATP1A3, ATP2A1, ATP2A2, RAC1, SLC9A1	0.0166073573776242
Heart Decompensation	hsa05020	Prion diseases	0.0108900704115569	IL1B, IL6, SOD1	0.0166073573776242
Heart Decompensation	hsa04610	Complement and coagulation cascades	0.0129979022242892	CFD, SERPINE1, PLAT, VWF	0.0193383423336985
Heart Decompensation	hsa05211	Renal cell carcinoma	0.0136494264781011	HIF1A, PIK3CG, RAC1, VEGFA	0.0193631398875388
Heart Decompensation	hsa05212	Pancreatic cancer	0.0136494264781011	PIK3CG, RAC1, TP53, VEGFA	0.0193631398875388
Heart Decompensation	hsa04145	Phagosome	0.0156316089665396	CYBB, ITGB1, OLR1, RAC1, NOX1, TUBB	0.0216710942490663
Heart Decompensation	hsa04510	Focal adhesion	0.0164338111557481	GSK3B, ITGB1, PDPK1, PIK3CG, RAC1, VEGFA, VWF	0.021976198541516
Heart Decompensation	hsa04630	Jak-STAT signaling pathway	0.0165722152936022	CSF2, CSF3, IFNG, IL6, PIK3CG, PRL	0.021976198541516
Heart Decompensation	hsa04670	Leukocyte transendothelial migration	0.0185877406874577	CYBB, ITGB1, PIK3CG, RAC1, NOX1	0.0238849529170238
Heart Decompensation	hsa04260	Cardiac muscle contraction	0.0187947170494614	ATP1A3, ATP2A2, SLC9A1, TNNT2	0.0238849529170238
Heart Decompensation	hsa05010	Alzheimer's disease	0.0230506712174771	ATP2A1, ATP2A2, GSK3B, IL1B, TNF, TNFRSF1A	0.0286957335564511
Heart Decompensation	hsa04722	Neurotrophin signaling pathway	0.0263423046172162	GSK3B, PIK3CG, MAP2K7, RAC1, TP53	0.0321376116330038
Heart Decompensation	hsa04012	ErbB signaling pathway	0.0280047582448049	GSK3B, NRG1, PIK3CG, MAP2K7	0.0334958873124137
Heart Decompensation	hsa04970	Salivary secretion	0.030119118603698	ADRB1, ADRB3, ATP1A3, SLC9A1	0.035332042977415
Heart Decompensation	hsa01040	Biosynthesis of unsaturated fatty acids	0.0311037235727311	SCD, ELOVL6	0.0357986252440868
Heart Decompensation	hsa05160	Hepatitis C	0.0322195668770619	GSK3B, PIK3CG, TNF, TNFRSF1A, TP53	0.0362932860449755
Heart Decompensation	hsa04650	Natural killer cell mediated cytotoxicity	0.0340384272634811	CSF2, IFNG, PIK3CG, RAC1, TNF	0.0362932860449755
Heart Decompensation	hsa05016	Huntington's disease	0.0340909752519642	PPARG, SOD1, SOD2, TP53, UCP1, PPARGC1A	0.0362932860449755
Heart Decompensation	hsa00330	Arginine and proline metabolism	0.0345083703378455	GATM, NOS2, NOS3	0.0362932860449755
Heart Decompensation	hsa05223	Non-small cell lung cancer	0.0345083703378455	PDPK1, PIK3CG, TP53	0.0362932860449755
Heart Decompensation	hsa04964	Proximal tubule bicarbonate reclamation	0.0368404788013384	ATP1A3, PCK1	0.0380893085912142
Heart Decompensation	hsa00590	Arachidonic acid metabolism	0.0431621912362666	EPHX2, PTGS1, PTGS2	0.0438815610902044
Heart Decompensation	hsa04916	Melanogenesis	0.044760793249486	EDN1, EDNRB, GSK3B, POMC	0.044760793249486
Lobomycosis	hsa04060	Cytokine-cytokine receptor interaction	2.28509431045069e-09	IFNG, IL4, IL5, IL10, IL13, IL17A, TGFB1, IL22	4.57018862090139e-08
Lobomycosis	hsa04630	Jak-STAT signaling pathway	1.2765263935503e-07	IFNG, IL4, IL5, IL10, IL13, IL22	1.19083326095848e-06
Lobomycosis	hsa05310	Asthma	1.78624989143771e-07	IL4, IL5, IL10, IL13	1.19083326095848e-06
Lobomycosis	hsa05330	Allograft rejection	4.27601918199654e-07	IFNG, IL4, IL5, IL10	2.13800959099827e-06
Lobomycosis	hsa04660	T cell receptor signaling pathway	8.13769516200048e-07	CTLA4, IFNG, IL4, IL5, IL10	3.25507806480019e-06
Lobomycosis	hsa04672	Intestinal immune network for IgA production	1.24656973398571e-06	IL4, IL5, IL10, TGFB1	4.15523244661902e-06
Lobomycosis	hsa05320	Autoimmune thyroid disease	1.72774454871375e-06	CTLA4, IL4, IL5, IL10	4.93641299632501e-06
Lobomycosis	hsa05140	Leishmaniasis	6.44067886785705e-06	IFNG, IL4, IL10, TGFB1	1.61016971696426e-05
Lobomycosis	hsa05323	Rheumatoid arthritis	1.64287886422842e-05	CTLA4, IFNG, IL17A, TGFB1	3.6508419205076e-05
Lobomycosis	hsa05144	Malaria	9.71365516551147e-05	IFNG, IL10, TGFB1	0.000194273103310229
Lobomycosis	hsa04664	Fc epsilon RI signaling pathway	0.000358395766729459	IL4, IL5, IL13	0.000651628666780835
Lobomycosis	hsa05142	Chagas disease (American trypanosomiasis)	0.00080434904144847	IFNG, IL10, TGFB1	0.0013082599267816
Lobomycosis	hsa05146	Amoebiasis	0.00085036895240804	IFNG, IL10, TGFB1	0.0013082599267816
Lobomycosis	hsa05145	Toxoplasmosis	0.00160776631156006	IFNG, IL10, TGFB1	0.00229680901651438
Lobomycosis	hsa05143	African trypanosomiasis	0.00183734851230089	IFNG, IL10	0.00244979801640118
Lobomycosis	hsa04350	TGF-beta signaling pathway	0.0102383699871459	IFNG, TGFB1	0.0127979624839324
Lobomycosis	hsa04640	Hematopoietic cell lineage	0.0111969144710606	IL4, IL5	0.0131728405541889
Lobomycosis	hsa04380	Osteoclast differentiation	0.0228214315095488	IFNG, TGFB1	0.0253571461217209
Lobomycosis	hsa05322	Systemic lupus erythematosus	0.0255651970098858	IFNG, IL10	0.0269107336946166
Lobomycosis	hsa04710	Circadian rhythm	0.0405032770148207	RORC	0.0405032770148207
Insulin-dependent diabetes mellitus secretory diarrhea syndrome	hsa04630	Jak-STAT signaling pathway	6.33012639976756e-07	IL2, IL2RA, IL2RG, IL7R, IL10	7.59615167972107e-06
Insulin-dependent diabetes mellitus secretory diarrhea syndrome	hsa04060	Cytokine-cytokine receptor interaction	9.05422063740745e-06	IL2, IL2RA, IL2RG, IL7R, IL10	5.43253238244447e-05
Insulin-dependent diabetes mellitus secretory diarrhea syndrome	hsa05320	Autoimmune thyroid disease	3.56141157138999e-05	CTLA4, IL2, IL10	0.000142456462855599
Insulin-dependent diabetes mellitus secretory diarrhea syndrome	hsa04660	T cell receptor signaling pathway	0.000317342199972989	CTLA4, IL2, IL10	0.000952026599918967
Insulin-dependent diabetes mellitus secretory diarrhea syndrome	hsa05340	Primary immunodeficiency	0.000945953456979781	IL2RG, IL7R	0.00211477323320881
Insulin-dependent diabetes mellitus secretory diarrhea syndrome	hsa05330	Allograft rejection	0.0010573866166044	IL2, IL10	0.00211477323320881
Insulin-dependent diabetes mellitus secretory diarrhea syndrome	hsa04672	Intestinal immune network for IgA production	0.0017774814453759	IL2, IL10	0.00304711104921583
Insulin-dependent diabetes mellitus secretory diarrhea syndrome	hsa04640	Hematopoietic cell lineage	0.00586932144305229	IL2RA, IL7R	0.00880398216457843
Insulin-dependent diabetes mellitus secretory diarrhea syndrome	hsa05142	Chagas disease (American trypanosomiasis)	0.00812267716772747	IL2, IL10	0.0108302362236366
Insulin-dependent diabetes mellitus secretory diarrhea syndrome	hsa04144	Endocytosis	0.0285200744142606	IL2RA, IL2RG	0.0342240892971127
Insulin-dependent diabetes mellitus secretory diarrhea syndrome	hsa05310	Asthma	0.0401922078138979	IL10	0.0438460448878886
Insulin-dependent diabetes mellitus secretory diarrhea syndrome	hsa05143	African trypanosomiasis	0.0467516081208156	IL10	0.0467516081208156
Periorbital swelling	hsa03022	Basal transcription factors	0.00128192829165055	GTF2I, GTF2IRD1	0.00897349804155386
Periorbital swelling	hsa05320	Autoimmune thyroid disease	0.00266398111197715	CTLA4, HLA-DPB1	0.00932393389192003
Periorbital swelling	hsa05323	Rheumatoid arthritis	0.00797515245005287	CTLA4, HLA-DPB1	0.0186086890501234
Periorbital swelling	hsa05145	Toxoplasmosis	0.0162963933369367	HLA-DPB1, TNFRSF1A	0.023144785188016
Periorbital swelling	hsa04514	Cell adhesion molecules (CAMs)	0.0165319894200114	CTLA4, HLA-DPB1	0.023144785188016
Periorbital swelling	hsa03430	Mismatch repair	0.0347455273126085	RFC2	0.0405364485313766
Periorbital swelling	hsa05310	Asthma	0.0451050612118821	HLA-DPB1	0.0451050612118821
Granulomatosis	hsa04145	Phagosome	2.27232013333033e-07	CYBA, CYBB, HLA-DPB1, NCF2, NCF1	2.27232013333033e-06
Granulomatosis	hsa05140	Leishmaniasis	7.09015258665957e-07	CYBA, HLA-DPB1, NCF2, NCF1	3.54507629332978e-06
Granulomatosis	hsa04670	Leukocyte transendothelial migration	4.84559581376063e-06	CYBA, CYBB, NCF2, NCF1	1.61519860458688e-05
Granulomatosis	hsa04380	Osteoclast differentiation	7.18352362329919e-06	CYBA, CYBB, NCF2, NCF1	1.7958809058248e-05
Granulomatosis	hsa05320	Autoimmune thyroid disease	0.00157174033970238	CTLA4, HLA-DPB1	0.00314348067940475
Granulomatosis	hsa05323	Rheumatoid arthritis	0.00474709709325033	CTLA4, HLA-DPB1	0.00791182848875055
Granulomatosis	hsa04514	Cell adhesion molecules (CAMs)	0.00993436769676	CTLA4, HLA-DPB1	0.0141919538525143
Granulomatosis	hsa05310	Asthma	0.0352549249322827	HLA-DPB1	0.0440686561653533
Granulomatosis	hsa05330	Allograft rejection	0.0433259925415025	HLA-DPB1	0.0479119923681243
Granulomatosis	hsa05332	Graft-versus-host disease	0.0479119923681243	HLA-DPB1	0.0479119923681243
Blood autoimmune disorders	hsa05320	Autoimmune thyroid disease	0.00886011245527352	CTLA4	0.0226614414721419
Blood autoimmune disorders	hsa05323	Rheumatoid arthritis	0.0155051967967285	CTLA4	0.0226614414721419
Blood autoimmune disorders	hsa04660	T cell receptor signaling pathway	0.0184017720224912	CTLA4	0.0226614414721419
Blood autoimmune disorders	hsa04514	Cell adhesion molecules (CAMs)	0.0226614414721419	CTLA4	0.0226614414721419
Deficiency of vitamin D3	hsa04630	Jak-STAT signaling pathway	0.000340851080028632	IL2, IL2RA, IL7R	0.00374936188031495
Deficiency of vitamin D3	hsa00510	N-Glycan biosynthesis	0.00100271966766292	MGAT1, MGAT5	0.00413992840293085
Deficiency of vitamin D3	hsa05320	Autoimmune thyroid disease	0.00112907138261751	CTLA4, IL2	0.00413992840293085
Deficiency of vitamin D3	hsa04060	Cytokine-cytokine receptor interaction	0.00164464389046934	IL2, IL2RA, IL7R	0.00452277069879068
Deficiency of vitamin D3	hsa04640	Hematopoietic cell lineage	0.00320632824220316	IL2RA, IL7R	0.00705392213284695
Deficiency of vitamin D3	hsa04660	T cell receptor signaling pathway	0.00479554651758189	CTLA4, IL2	0.00879183528223347
Deficiency of vitamin D3	hsa05340	Primary immunodeficiency	0.0352667912235044	IL7R	0.0474985269877223
Deficiency of vitamin D3	hsa05330	Allograft rejection	0.0372503079764549	IL2	0.0474985269877223
Deficiency of vitamin D3	hsa05332	Graft-versus-host disease	0.0412071472439554	IL2	0.0474985269877223
Deficiency of vitamin D3	hsa04940	Type I diabetes mellitus	0.0431804790797475	IL2	0.0474985269877223
Deficiency of vitamin D3	hsa04672	Intestinal immune network for IgA production	0.0480990065780759	IL2	0.0480990065780759
Dysplasia of colon	hsa05143	African trypanosomiasis	0.011892520903159	MYD88	0.0445719964278008
Dysplasia of colon	hsa05144	Malaria	0.0173054080205831	MYD88	0.0445719964278008
Dysplasia of colon	hsa05320	Autoimmune thyroid disease	0.0176432198431953	CTLA4	0.0445719964278008
Dysplasia of colon	hsa05140	Leishmaniasis	0.0243872609227854	MYD88	0.0445719964278008
Dysplasia of colon	hsa04210	Apoptosis	0.029430047516656	MYD88	0.0445719964278008
Dysplasia of colon	hsa05323	Rheumatoid arthritis	0.0307725838266362	CTLA4	0.0445719964278008
Dysplasia of colon	hsa04620	Toll-like receptor signaling pathway	0.0344597676398224	MYD88	0.0445719964278008
Dysplasia of colon	hsa05142	Chagas disease (American trypanosomiasis)	0.035129409745125	MYD88	0.0445719964278008
Dysplasia of colon	hsa04660	T cell receptor signaling pathway	0.0364679970772915	CTLA4	0.0445719964278008
Dysplasia of colon	hsa05145	Toxoplasmosis	0.0444800084740419	MYD88	0.0448131163672006
Dysplasia of colon	hsa04514	Cell adhesion molecules (CAMs)	0.0448131163672006	CTLA4	0.0448131163672006
Latent Autoimmune Diabetes in Adults	hsa04940	Type I diabetes mellitus	7.94422960587184e-07	GAD1, GAD2, HLA-DOA, IFNG	1.7477305132918e-05
Latent Autoimmune Diabetes in Adults	hsa05323	Rheumatoid arthritis	1.64287886422842e-05	CTLA4, HLA-DOA, IFNG, IL6	0.000180716675065126
Latent Autoimmune Diabetes in Adults	hsa05332	Graft-versus-host disease	5.02356560378627e-05	HLA-DOA, IFNG, IL6	0.000368394810944326
Latent Autoimmune Diabetes in Adults	hsa00430	Taurine and hypotaurine metabolism	0.000142559463890011	GAD1, GAD2	0.000784077051395059
Latent Autoimmune Diabetes in Adults	hsa00410	beta-Alanine metabolism	0.000722874931145415	GAD1, GAD2	0.00318064969703983
Latent Autoimmune Diabetes in Adults	hsa00650	Butanoate metabolism	0.00135016108886501	GAD1, GAD2	0.00482851898403911
Latent Autoimmune Diabetes in Adults	hsa00250	Alanine, aspartate and glutamate metabolism	0.00153634694946699	GAD1, GAD2	0.00482851898403911
Latent Autoimmune Diabetes in Adults	hsa05143	African trypanosomiasis	0.00183734851230089	IFNG, IL6	0.00501695588818454
Latent Autoimmune Diabetes in Adults	hsa05330	Allograft rejection	0.0020523910451664	HLA-DOA, IFNG	0.00501695588818454
Latent Autoimmune Diabetes in Adults	hsa04672	Intestinal immune network for IgA production	0.00343721937559996	HLA-DOA, IL6	0.0073774418773622
Latent Autoimmune Diabetes in Adults	hsa05144	Malaria	0.0038732483866554	IFNG, IL6	0.0073774418773622
Latent Autoimmune Diabetes in Adults	hsa05320	Autoimmune thyroid disease	0.00402405920583393	CTLA4, HLA-DOA	0.0073774418773622
Latent Autoimmune Diabetes in Adults	hsa05140	Leishmaniasis	0.00759968426444256	HLA-DOA, IFNG	0.0128610041398259
Latent Autoimmune Diabetes in Adults	hsa04612	Antigen processing and presentation	0.00843922242251338	HLA-DOA, IFNG	0.0132616352353782
Latent Autoimmune Diabetes in Adults	hsa05142	Chagas disease (American trypanosomiasis)	0.015412015860839	IFNG, IL6	0.0214285811138493
Latent Autoimmune Diabetes in Adults	hsa05146	Amoebiasis	0.0159806949157222	IFNG, IL6	0.0214285811138493
Latent Autoimmune Diabetes in Adults	hsa04660	T cell receptor signaling pathway	0.0165584490425199	CTLA4, IFNG	0.0214285811138493
Latent Autoimmune Diabetes in Adults	hsa05145	Toxoplasmosis	0.0241767557132446	HLA-DOA, IFNG	0.0281217167108743
Latent Autoimmune Diabetes in Adults	hsa04514	Cell adhesion molecules (CAMs)	0.0245207798961442	CTLA4, HLA-DOA	0.0281217167108743
Latent Autoimmune Diabetes in Adults	hsa05322	Systemic lupus erythematosus	0.0255651970098858	HLA-DOA, IFNG	0.0281217167108743
Latent Autoimmune Diabetes in Adults	hsa04630	Jak-STAT signaling pathway	0.032598102674353	IFNG, IL6	0.0341503932778936
Latent Autoimmune Diabetes in Adults	hsa04950	Maturity onset diabetes of the young	0.0459093411789322	HNF4A	0.0459093411789322
DIABETES MELLITUS, INSULIN-DEPENDENT, 12	hsa05320	Autoimmune thyroid disease	0.00886011245527352	CTLA4	0.0226614414721419
DIABETES MELLITUS, INSULIN-DEPENDENT, 12	hsa05323	Rheumatoid arthritis	0.0155051967967285	CTLA4	0.0226614414721419
DIABETES MELLITUS, INSULIN-DEPENDENT, 12	hsa04660	T cell receptor signaling pathway	0.0184017720224912	CTLA4	0.0226614414721419
DIABETES MELLITUS, INSULIN-DEPENDENT, 12	hsa04514	Cell adhesion molecules (CAMs)	0.0226614414721419	CTLA4	0.0226614414721419
Latent autoimmune diabetes mellitus in adult	hsa04940	Type I diabetes mellitus	2.74836952242615e-16	GAD1, GAD2, HLA-B, HLA-C, HLA-DOA, HLA-DQB1, HLA-DRB1, IFNG, INS	8.51994551952107e-15
Latent autoimmune diabetes mellitus in adult	hsa05330	Allograft rejection	2.38539741152074e-12	HLA-B, HLA-C, HLA-DOA, HLA-DQB1, HLA-DRB1, IFNG, IL10	3.69736598785715e-11
Latent autoimmune diabetes mellitus in adult	hsa05332	Graft-versus-host disease	5.18087791523414e-12	HLA-B, HLA-C, HLA-DOA, HLA-DQB1, HLA-DRB1, IFNG, KIR3DL1	5.35357384574195e-11
Latent autoimmune diabetes mellitus in adult	hsa05320	Autoimmune thyroid disease	3.03753123139783e-11	CTLA4, HLA-B, HLA-C, HLA-DOA, HLA-DQB1, HLA-DRB1, IL10	2.35408670433332e-10
Latent autoimmune diabetes mellitus in adult	hsa04612	Antigen processing and presentation	4.80492985724405e-10	HLA-B, HLA-C, HLA-DOA, HLA-DQB1, HLA-DRB1, IFNG, KIR3DL1	2.97905651149131e-09
Latent autoimmune diabetes mellitus in adult	hsa04514	Cell adhesion molecules (CAMs)	8.04246944383308e-07	CTLA4, HLA-B, HLA-C, HLA-DOA, HLA-DQB1, HLA-DRB1	3.33353182735662e-06
Latent autoimmune diabetes mellitus in adult	hsa05416	Viral myocarditis	8.24083342585051e-07	HLA-B, HLA-C, HLA-DOA, HLA-DQB1, HLA-DRB1	3.33353182735662e-06
Latent autoimmune diabetes mellitus in adult	hsa05140	Leishmaniasis	9.49675807481056e-07	HLA-DOA, HLA-DQB1, HLA-DRB1, IFNG, IL10	3.33353182735662e-06
Latent autoimmune diabetes mellitus in adult	hsa05310	Asthma	9.67799562780954e-07	HLA-DOA, HLA-DQB1, HLA-DRB1, IL10	3.33353182735662e-06
Latent autoimmune diabetes mellitus in adult	hsa05323	Rheumatoid arthritis	3.06334473742384e-06	CTLA4, HLA-DOA, HLA-DQB1, HLA-DRB1, IFNG	9.49636868601391e-06
Latent autoimmune diabetes mellitus in adult	hsa04672	Intestinal immune network for IgA production	6.6713756337603e-06	HLA-DOA, HLA-DQB1, HLA-DRB1, IL10	1.88011495133245e-05
Latent autoimmune diabetes mellitus in adult	hsa05150	Staphylococcus aureus infection	1.15596420295294e-05	HLA-DOA, HLA-DQB1, HLA-DRB1, IL10	2.98624085762842e-05
Latent autoimmune diabetes mellitus in adult	hsa05145	Toxoplasmosis	1.90964702444889e-05	HLA-DOA, HLA-DQB1, HLA-DRB1, IFNG, IL10	4.55377367368581e-05
Latent autoimmune diabetes mellitus in adult	hsa05322	Systemic lupus erythematosus	2.20808038146451e-05	HLA-DOA, HLA-DQB1, HLA-DRB1, IFNG, IL10	4.88932084467141e-05
Latent autoimmune diabetes mellitus in adult	hsa04145	Phagosome	3.90560966187629e-05	HLA-B, HLA-C, HLA-DOA, HLA-DQB1, HLA-DRB1	8.071593301211e-05
Latent autoimmune diabetes mellitus in adult	hsa00430	Taurine and hypotaurine metabolism	0.000309627452192794	GAD1, GAD2	0.000599903188623538
Latent autoimmune diabetes mellitus in adult	hsa04650	Natural killer cell mediated cytotoxicity	0.000404326471318643	HLA-B, HLA-C, IFNG, KIR3DL1	0.000737301212404584
Latent autoimmune diabetes mellitus in adult	hsa00410	beta-Alanine metabolism	0.0015593723799681	GAD1, GAD2	0.00268558576550062
Latent autoimmune diabetes mellitus in adult	hsa04660	T cell receptor signaling pathway	0.00285026135882626	CTLA4, IFNG, IL10	0.0044940391975612
Latent autoimmune diabetes mellitus in adult	hsa00650	Butanoate metabolism	0.00289938012745884	GAD1, GAD2	0.0044940391975612
Latent autoimmune diabetes mellitus in adult	hsa00250	Alanine, aspartate and glutamate metabolism	0.003295471868531	GAD1, GAD2	0.0048647441868791
Latent autoimmune diabetes mellitus in adult	hsa04140	Regulation of autophagy	0.00371551513357162	IFNG, INS	0.00523549859730546
Latent autoimmune diabetes mellitus in adult	hsa05143	African trypanosomiasis	0.00393444373087399	IFNG, IL10	0.0053029458981345
Latent autoimmune diabetes mellitus in adult	hsa04630	Jak-STAT signaling pathway	0.00785728641624892	IFNG, IL2RA, IL10	0.0101489949543215
Latent autoimmune diabetes mellitus in adult	hsa05144	Malaria	0.00821953030235036	IFNG, IL10	0.0101922175749144
Latent autoimmune diabetes mellitus in adult	hsa04144	Endocytosis	0.015939332572002	HLA-B, HLA-C, IL2RA	0.0190045888358485
Latent autoimmune diabetes mellitus in adult	hsa04640	Hematopoietic cell lineage	0.0232732512222038	HLA-DRB1, IL2RA	0.0263175027448983
Latent autoimmune diabetes mellitus in adult	hsa05215	Prostate cancer	0.0237706476405533	INS, TCF7L2	0.0263175027448983
Latent autoimmune diabetes mellitus in adult	hsa05142	Chagas disease (American trypanosomiasis)	0.0317500222086138	IFNG, IL10	0.0329453388457603
Latent autoimmune diabetes mellitus in adult	hsa05146	Amoebiasis	0.0328849359668733	IFNG, IL10	0.0329453388457603
Latent autoimmune diabetes mellitus in adult	hsa04060	Cytokine-cytokine receptor interaction	0.0329453388457603	IFNG, IL2RA, IL10	0.0329453388457603
aggressive cancer	hsa05213	Endometrial cancer	4.84815360831395e-12	BRAF, EGFR, KRAS, MYC, PIK3CA, PIK3CB, PIK3CD, PIK3CG, PTEN, TP53	2.37559526807384e-10
aggressive cancer	hsa05200	Pathways in cancer	1.67084446265077e-11	BRAF, CDKN1B, EGFR, GLI1, HIF1A, IGF1R, KRAS, MMP9, MYC, NOS2, PIK3CA, PIK3CB, PIK3CD, PIK3CG, PTEN, PTGS2, RET, TP53	4.09356893349438e-10
aggressive cancer	hsa05214	Glioma	5.08840391299593e-11	BRAF, EGFR, IGF1R, KRAS, PIK3CA, PIK3CB, PIK3CD, PIK3CG, PTEN, TP53	7.08640838272646e-10
aggressive cancer	hsa05215	Prostate cancer	5.78482316957262e-11	BRAF, CDKN1B, EGFR, IGF1R, KRAS, PIK3CA, PIK3CB, PIK3CD, PIK3CG, PTEN, TP53	7.08640838272646e-10
aggressive cancer	hsa05218	Melanoma	1.26763764567845e-10	BRAF, EGFR, IGF1R, KRAS, PIK3CA, PIK3CB, PIK3CD, PIK3CG, PTEN, TP53	1.24228489276488e-09
aggressive cancer	hsa05222	Small cell lung cancer	7.92076755972754e-10	CDKN1B, MYC, NOS2, PIK3CA, PIK3CB, PIK3CD, PIK3CG, PTEN, PTGS2, TP53	6.46862684044416e-09
aggressive cancer	hsa05220	Chronic myeloid leukemia	4.01510607280653e-09	BRAF, CDKN1B, KRAS, MYC, PIK3CA, PIK3CB, PIK3CD, PIK3CG, TP53	2.81057425096457e-08
aggressive cancer	hsa05223	Non-small cell lung cancer	7.16387531430789e-09	BRAF, EGFR, KRAS, PIK3CA, PIK3CB, PIK3CD, PIK3CG, TP53	4.38787363001359e-08
aggressive cancer	hsa04012	ErbB signaling pathway	1.95335229815669e-08	BRAF, CDKN1B, EGFR, KRAS, MYC, PIK3CA, PIK3CB, PIK3CD, PIK3CG	1.0634918067742e-07
aggressive cancer	hsa05210	Colorectal cancer	2.21966872465334e-08	BRAF, KRAS, MYC, PIK3CA, PIK3CB, PIK3CD, PIK3CG, TP53	1.08763767508013e-07
aggressive cancer	hsa05212	Pancreatic cancer	5.90903157328988e-08	BRAF, EGFR, KRAS, PIK3CA, PIK3CB, PIK3CD, PIK3CG, TP53	2.6322049735564e-07
aggressive cancer	hsa05221	Acute myeloid leukemia	2.59808826059087e-07	BRAF, KRAS, MYC, PIK3CA, PIK3CB, PIK3CD, PIK3CG	1.06088603974127e-06
aggressive cancer	hsa05219	Bladder cancer	8.01205527629628e-07	BRAF, EGFR, KRAS, MMP9, MYC, TP53	3.01992852721937e-06
aggressive cancer	hsa05211	Renal cell carcinoma	1.08954040590572e-06	BRAF, HIF1A, KRAS, PIK3CA, PIK3CB, PIK3CD, PIK3CG	3.81339142067001e-06
aggressive cancer	hsa04370	VEGF signaling pathway	1.91661852080347e-06	KRAS, PIK3CA, PIK3CB, PIK3CD, PIK3CG, PTGS2, SPHK1	6.26095383462466e-06
aggressive cancer	hsa05216	Thyroid cancer	2.72384918751487e-06	BRAF, KRAS, MYC, RET, TP53	8.34178813676428e-06
aggressive cancer	hsa04150	mTOR signaling pathway	2.92785063101356e-06	BRAF, HIF1A, PIK3CA, PIK3CB, PIK3CD, PIK3CG	8.43909887762733e-06
aggressive cancer	hsa04914	Progesterone-mediated oocyte maturation	4.43582936984382e-06	BRAF, IGF1R, KRAS, PIK3CA, PIK3CB, PIK3CD, PIK3CG	1.20753132845748e-05
aggressive cancer	hsa04666	Fc gamma R-mediated phagocytosis	8.05328411052419e-06	MYO10, PIK3CA, PIK3CB, PIK3CD, PIK3CG, PLPP1, SPHK1	2.07689958639834e-05
aggressive cancer	hsa05160	Hepatitis C	8.89841557938775e-06	BRAF, EGFR, KRAS, PIK3CA, PIK3CB, PIK3CD, PIK3CG, TP53	2.18011181695e-05
aggressive cancer	hsa04910	Insulin signaling pathway	1.1062068612363e-05	ACACA, BRAF, FASN, KRAS, PIK3CA, PIK3CB, PIK3CD, PIK3CG	2.58114934288469e-05
aggressive cancer	hsa04960	Aldosterone-regulated sodium reabsorption	1.80519004894386e-05	KRAS, PIK3CA, PIK3CB, PIK3CD, PIK3CG	4.02065056355679e-05
aggressive cancer	hsa04930	Type II diabetes mellitus	3.50561036015668e-05	PIK3CA, PIK3CB, PIK3CD, PIK3CG, PKM	7.46847424555118e-05
aggressive cancer	hsa04722	Neurotrophin signaling pathway	5.76386365977091e-05	BRAF, KRAS, PIK3CA, PIK3CB, PIK3CD, PIK3CG, TP53	0.000117678883053656
aggressive cancer	hsa00562	Inositol phosphate metabolism	8.12331788844675e-05	PIK3CA, PIK3CB, PIK3CD, PIK3CG, PTEN	0.000159217030613556
aggressive cancer	hsa04062	Chemokine signaling pathway	0.000106706554577165	BRAF, CXCL3, KRAS, PIK3CA, PIK3CB, PIK3CD, PIK3CG, CCR2	0.000201100814395427
aggressive cancer	hsa04510	Focal adhesion	0.000158365021275695	BRAF, EGFR, IGF1R, PIK3CA, PIK3CB, PIK3CD, PIK3CG, PTEN	0.000287403186759594
aggressive cancer	hsa04630	Jak-STAT signaling pathway	0.000202545387266906	IL2RA, IL4R, MYC, PIK3CA, PIK3CB, PIK3CD, PIK3CG	0.000354454427717085
aggressive cancer	hsa04810	Regulation of actin cytoskeleton	0.000244515363655271	BRAF, EGFR, KRAS, PIK3CA, PIK3CB, PIK3CD, PIK3CG, EZR	0.000413146648934768
aggressive cancer	hsa04670	Leukocyte transendothelial migration	0.000290302194154836	MMP9, PIK3CA, PIK3CB, PIK3CD, PIK3CG, EZR	0.000474160250452898
aggressive cancer	hsa04662	B cell receptor signaling pathway	0.000300708121265059	KRAS, PIK3CA, PIK3CB, PIK3CD, PIK3CG	0.000475312836838318
aggressive cancer	hsa04070	Phosphatidylinositol signaling system	0.000361285737153966	PIK3CA, PIK3CB, PIK3CD, PIK3CG, PTEN	0.000553218785017011
aggressive cancer	hsa04664	Fc epsilon RI signaling pathway	0.000383401010789333	KRAS, PIK3CA, PIK3CB, PIK3CD, PIK3CG	0.000558723888281824
aggressive cancer	hsa04973	Carbohydrate digestion and absorption	0.000387685963297592	PIK3CA, PIK3CB, PIK3CD, PIK3CG	0.000558723888281824
aggressive cancer	hsa04210	Apoptosis	0.000599268070614833	PIK3CA, PIK3CB, PIK3CD, PIK3CG, TP53	0.000838975298860766
aggressive cancer	hsa04650	Natural killer cell mediated cytotoxicity	0.000681642202355679	BRAF, KRAS, PIK3CA, PIK3CB, PIK3CD, PIK3CG	0.000927790775428564
aggressive cancer	hsa04320	Dorso-ventral axis formation	0.000865931048301683	EGFR, KRAS, NOTCH1	0.00114677355045358
aggressive cancer	hsa00061	Fatty acid biosynthesis	0.00092255880817261	ACACA, FASN	0.00118961530527521
aggressive cancer	hsa05142	Chagas disease (American trypanosomiasis)	0.0013476532579215	NOS2, PIK3CA, PIK3CB, PIK3CD, PIK3CG	0.00169320537533727
aggressive cancer	hsa05146	Amoebiasis	0.001467484079189	NOS2, PIK3CA, PIK3CB, PIK3CD, PIK3CG	0.00179766799700653
aggressive cancer	hsa04660	T cell receptor signaling pathway	0.00159501797111688	KRAS, PIK3CA, PIK3CB, PIK3CD, PIK3CG	0.0019062409898714
aggressive cancer	hsa05100	Bacterial invasion of epithelial cells	0.00224925462067758	PIK3CA, PIK3CB, PIK3CD, PIK3CG	0.00262413039079051
aggressive cancer	hsa04380	Osteoclast differentiation	0.00336047572565453	PIK3CA, PIK3CB, PIK3CD, PIK3CG, TNFRSF11A	0.00382937931528074
aggressive cancer	hsa05145	Toxoplasmosis	0.00383647290346003	NOS2, PIK3CA, PIK3CB, PIK3CD, PIK3CG	0.00427243573339867
aggressive cancer	hsa04060	Cytokine-cytokine receptor interaction	0.0047148091367672	ACVR1B, EGFR, CXCL3, IL2RA, IL4R, TNFRSF11A, CCR2	0.00513390328225762
aggressive cancer	hsa04620	Toll-like receptor signaling pathway	0.00865235195172328	PIK3CA, PIK3CB, PIK3CD, PIK3CG	0.00921663577466176
aggressive cancer	hsa04730	Long-term depression	0.0181192080891145	BRAF, IGF1R, KRAS	0.0188902382205662
aggressive cancer	hsa00620	Pyruvate metabolism	0.0403757022367393	ACACA, PKM	0.0403757022367393
aggressive cancer	hsa00600	Sphingolipid metabolism	0.0403757022367393	PLPP1, SPHK1	0.0403757022367393
Recurrent intrapulmonary hemorrhage	hsa05320	Autoimmune thyroid disease	7.70050673515587e-05	CTLA4, HLA-DPB1	0.00115507601027338
Recurrent intrapulmonary hemorrhage	hsa05323	Rheumatoid arthritis	0.000237809766820991	CTLA4, HLA-DPB1	0.00178357325115743
Recurrent intrapulmonary hemorrhage	hsa04514	Cell adhesion molecules (CAMs)	0.000509766577082944	CTLA4, HLA-DPB1	0.00254883288541472
Recurrent intrapulmonary hemorrhage	hsa05310	Asthma	0.0101979448357998	HLA-DPB1	0.0305467952128634
Recurrent intrapulmonary hemorrhage	hsa05330	Allograft rejection	0.0125699448176807	HLA-DPB1	0.0305467952128634
Recurrent intrapulmonary hemorrhage	hsa05332	Graft-versus-host disease	0.0139240957682872	HLA-DPB1	0.0305467952128634
Recurrent intrapulmonary hemorrhage	hsa04940	Type I diabetes mellitus	0.0146008228043711	HLA-DPB1	0.0305467952128634
Recurrent intrapulmonary hemorrhage	hsa04672	Intestinal immune network for IgA production	0.0162916241135271	HLA-DPB1	0.0305467952128634
Recurrent intrapulmonary hemorrhage	hsa05150	Staphylococcus aureus infection	0.0186563068718139	HLA-DPB1	0.0310938447863564
Recurrent intrapulmonary hemorrhage	hsa05416	Viral myocarditis	0.0237139021324828	HLA-DPB1	0.0321666020311911
Recurrent intrapulmonary hemorrhage	hsa05140	Leishmaniasis	0.0243872609227854	HLA-DPB1	0.0321666020311911
Recurrent intrapulmonary hemorrhage	hsa04612	Antigen processing and presentation	0.0257332816249529	HLA-DPB1	0.0321666020311911
Recurrent intrapulmonary hemorrhage	hsa04660	T cell receptor signaling pathway	0.0364679970772915	CTLA4	0.0420784581661056
Recurrent intrapulmonary hemorrhage	hsa05145	Toxoplasmosis	0.0444800084740419	HLA-DPB1	0.045812091607458
Recurrent intrapulmonary hemorrhage	hsa05322	Systemic lupus erythematosus	0.045812091607458	HLA-DPB1	0.045812091607458
CTLA4 Haploinsufficiency	hsa05320	Autoimmune thyroid disease	0.00886011245527352	CTLA4	0.0226614414721419
CTLA4 Haploinsufficiency	hsa05323	Rheumatoid arthritis	0.0155051967967285	CTLA4	0.0226614414721419
CTLA4 Haploinsufficiency	hsa04660	T cell receptor signaling pathway	0.0184017720224912	CTLA4	0.0226614414721419
CTLA4 Haploinsufficiency	hsa04514	Cell adhesion molecules (CAMs)	0.0226614414721419	CTLA4	0.0226614414721419
Small vessel vasculitis	hsa04145	Phagosome	0.00199106626703552	MBL2, MPO	0.00995533133517761
Small vessel vasculitis	hsa05320	Autoimmune thyroid disease	0.0263499784196662	CTLA4	0.043578624588461
Small vessel vasculitis	hsa05150	Staphylococcus aureus infection	0.0278558812917985	MBL2	0.043578624588461
Small vessel vasculitis	hsa04610	Complement and coagulation cascades	0.0348628996707688	MBL2	0.043578624588461
Small vessel vasculitis	hsa05323	Rheumatoid arthritis	0.0458057685670105	CTLA4	0.0458057685670105
Abnormality of the oral cavity	hsa05320	Autoimmune thyroid disease	7.70050673515587e-05	CTLA4, HLA-DPB1	0.00115507601027338
Abnormality of the oral cavity	hsa05323	Rheumatoid arthritis	0.000237809766820991	CTLA4, HLA-DPB1	0.00178357325115743
Abnormality of the oral cavity	hsa04514	Cell adhesion molecules (CAMs)	0.000509766577082944	CTLA4, HLA-DPB1	0.00254883288541472
Abnormality of the oral cavity	hsa05310	Asthma	0.0101979448357998	HLA-DPB1	0.0305467952128634
Abnormality of the oral cavity	hsa05330	Allograft rejection	0.0125699448176807	HLA-DPB1	0.0305467952128634
Abnormality of the oral cavity	hsa05332	Graft-versus-host disease	0.0139240957682872	HLA-DPB1	0.0305467952128634
Abnormality of the oral cavity	hsa04940	Type I diabetes mellitus	0.0146008228043711	HLA-DPB1	0.0305467952128634
Abnormality of the oral cavity	hsa04672	Intestinal immune network for IgA production	0.0162916241135271	HLA-DPB1	0.0305467952128634
Abnormality of the oral cavity	hsa05150	Staphylococcus aureus infection	0.0186563068718139	HLA-DPB1	0.0310938447863564
Abnormality of the oral cavity	hsa05416	Viral myocarditis	0.0237139021324828	HLA-DPB1	0.0321666020311911
Abnormality of the oral cavity	hsa05140	Leishmaniasis	0.0243872609227854	HLA-DPB1	0.0321666020311911
Abnormality of the oral cavity	hsa04612	Antigen processing and presentation	0.0257332816249529	HLA-DPB1	0.0321666020311911
Abnormality of the oral cavity	hsa04660	T cell receptor signaling pathway	0.0364679970772915	CTLA4	0.0420784581661056
Abnormality of the oral cavity	hsa05145	Toxoplasmosis	0.0444800084740419	HLA-DPB1	0.045812091607458
Abnormality of the oral cavity	hsa05322	Systemic lupus erythematosus	0.045812091607458	HLA-DPB1	0.045812091607458
Macular Dystrophy, Butterfly-Shaped Pigmentary, 2	hsa05213	Endometrial cancer	0.0263499784196662	CTNNA1	0.0383537470410951
Macular Dystrophy, Butterfly-Shaped Pigmentary, 2	hsa05014	Amyotrophic lateral sclerosis (ALS)	0.0268521187092897	PRPH2	0.0383537470410951
Macular Dystrophy, Butterfly-Shaped Pigmentary, 2	hsa05100	Bacterial invasion of epithelial cells	0.0353621085157666	CTNNA1	0.0383537470410951
Macular Dystrophy, Butterfly-Shaped Pigmentary, 2	hsa04520	Adherens junction	0.0368587021455459	CTNNA1	0.0383537470410951
Macular Dystrophy, Butterfly-Shaped Pigmentary, 2	hsa05412	Arrhythmogenic right ventricular cardiomyopathy (ARVC)	0.0373572224860503	CTNNA1	0.0383537470410951
Macular Dystrophy, Butterfly-Shaped Pigmentary, 2	hsa04370	VEGF signaling pathway	0.0383537470410951	MAPKAPK3	0.0383537470410951
Patterned dystrophy of retinal pigment epithelium	hsa05213	Endometrial cancer	0.0263499784196662	CTNNA1	0.0383537470410951
Patterned dystrophy of retinal pigment epithelium	hsa05014	Amyotrophic lateral sclerosis (ALS)	0.0268521187092897	PRPH2	0.0383537470410951
Patterned dystrophy of retinal pigment epithelium	hsa05100	Bacterial invasion of epithelial cells	0.0353621085157666	CTNNA1	0.0383537470410951
Patterned dystrophy of retinal pigment epithelium	hsa04520	Adherens junction	0.0368587021455459	CTNNA1	0.0383537470410951
Patterned dystrophy of retinal pigment epithelium	hsa05412	Arrhythmogenic right ventricular cardiomyopathy (ARVC)	0.0373572224860503	CTNNA1	0.0383537470410951
Patterned dystrophy of retinal pigment epithelium	hsa04370	VEGF signaling pathway	0.0383537470410951	MAPKAPK3	0.0383537470410951
Butterfly-shaped pigmentary macular dystrophy	hsa05213	Endometrial cancer	0.0176432198431953	CTNNA1	0.0350845423883858
Butterfly-shaped pigmentary macular dystrophy	hsa05014	Amyotrophic lateral sclerosis (ALS)	0.0179809735926045	PRPH2	0.0350845423883858
Butterfly-shaped pigmentary macular dystrophy	hsa05100	Bacterial invasion of epithelial cells	0.0237139021324828	CTNNA1	0.0350845423883858
Butterfly-shaped pigmentary macular dystrophy	hsa04520	Adherens junction	0.0247238532081322	CTNNA1	0.0350845423883858
Butterfly-shaped pigmentary macular dystrophy	hsa05412	Arrhythmogenic right ventricular cardiomyopathy (ARVC)	0.0250603874202756	CTNNA1	0.0350845423883858
Butterfly-shaped pigmentary macular dystrophy	hsa04670	Leukocyte transendothelial migration	0.0391423842278754	CTNNA1	0.0444800084740419
Butterfly-shaped pigmentary macular dystrophy	hsa04530	Tight junction	0.0444800084740419	CTNNA1	0.0444800084740419
Interleukin 10 Measurement	hsa05213	Endometrial cancer	0.00886011245527352	CTNNA2	0.018912932356449
Interleukin 10 Measurement	hsa05100	Bacterial invasion of epithelial cells	0.011927074459022	CTNNA2	0.018912932356449
Interleukin 10 Measurement	hsa04520	Adherens junction	0.0124382347929801	CTNNA2	0.018912932356449
Interleukin 10 Measurement	hsa05412	Arrhythmogenic right ventricular cardiomyopathy (ARVC)	0.012608621570966	CTNNA2	0.018912932356449
Interleukin 10 Measurement	hsa04670	Leukocyte transendothelial migration	0.0197648662463792	CTNNA2	0.0224910546941557
Interleukin 10 Measurement	hsa04530	Tight junction	0.0224910546941557	CTNNA2	0.0224910546941557
Juvenile nephropathic cystinosis (disorder)	hsa04520	Adherens junction	0.0247238532081322	FARP2	0.0408119888178885
Juvenile nephropathic cystinosis (disorder)	hsa04142	Lysosome	0.0408119888178885	CTNS	0.0408119888178885
PEROXISOME BIOGENESIS DISORDER, COMPLEMENTATION GROUP A	hsa00061	Fatty acid biosynthesis	0.0051028982965603	ACACA	0.0255144914828015
PEROXISOME BIOGENESIS DISORDER, COMPLEMENTATION GROUP A	hsa00640	Propanoate metabolism	0.0269753106169021	ACACA	0.043537046797464
PEROXISOME BIOGENESIS DISORDER, COMPLEMENTATION GROUP A	hsa00620	Pyruvate metabolism	0.0336273092213708	ACACA	0.043537046797464
PEROXISOME BIOGENESIS DISORDER, COMPLEMENTATION GROUP A	hsa00280	Valine, leucine and isoleucine degradation	0.0369396377143223	MCCC1	0.043537046797464
PEROXISOME BIOGENESIS DISORDER, COMPLEMENTATION GROUP A	hsa05320	Autoimmune thyroid disease	0.043537046797464	CGA	0.043537046797464
Hyperchloremic metabolic acidosis	hsa04950	Maturity onset diabetes of the young	0.0211248093402964	NEUROG3	0.0303989931782311
Hyperchloremic metabolic acidosis	hsa00052	Galactose metabolism	0.0227992448836734	GALT	0.0303989931782311
Hyperchloremic metabolic acidosis	hsa04966	Collecting duct acid secretion	0.0227992448836734	SLC4A1	0.0303989931782311
Hyperchloremic metabolic acidosis	hsa00520	Amino sugar and nucleotide sugar metabolism	0.0402428773338785	GALT	0.0402428773338785
Epithelial corneal erosions	hsa04010	MAPK signaling pathway	0.000257328334594316	FGF10, FGFR3, FGFR2, NTRK1	0.00154397000756589
Epithelial corneal erosions	hsa05200	Pathways in cancer	0.000547421871284378	FGF10, FGFR3, FGFR2, NTRK1	0.00164226561385313
Epithelial corneal erosions	hsa04144	Endocytosis	0.00195118620894848	FGFR3, FGFR2, NTRK1	0.00345869530832626
Epithelial corneal erosions	hsa04810	Regulation of actin cytoskeleton	0.0023057968722175	FGF10, FGFR3, FGFR2	0.00345869530832626
Epithelial corneal erosions	hsa00533	Glycosaminoglycan biosynthesis - keratan sulfate	0.0202764328336975	CHST6	0.024331719400437
Epithelial corneal erosions	hsa05216	Thyroid cancer	0.0388755990454671	NTRK1	0.0388755990454671
Industrial Dermatosis	hsa00232	Caffeine metabolism	7.30891116621993e-06	NAT1, NAT2	0.000182722779155498
Industrial Dermatosis	hsa00983	Drug metabolism - other enzymes	0.000456796802459837	NAT1, NAT2	0.00570996003074796
Industrial Dermatosis	hsa00410	beta-Alanine metabolism	0.0149137297753078	ALDH2	0.0420122365764655
Industrial Dermatosis	hsa00053	Ascorbate and aldarate metabolism	0.0176072906880286	ALDH2	0.0420122365764655
Industrial Dermatosis	hsa00340	Histidine metabolism	0.0196238334623628	ALDH2	0.0420122365764655
Industrial Dermatosis	hsa05310	Asthma	0.0202953239873886	HLA-DMA	0.0420122365764655
Industrial Dermatosis	hsa00640	Propanoate metabolism	0.0216372701471165	ALDH2	0.0420122365764655
Industrial Dermatosis	hsa00040	Pentose and glucuronate interconversions	0.0216372701471165	ALDH2	0.0420122365764655
Industrial Dermatosis	hsa01100	Metabolic pathways	0.0243835936231578	NAT1, NAT2, ALDH2	0.0420122365764655
Industrial Dermatosis	hsa05330	Allograft rejection	0.0249861042004281	HLA-DMA	0.0420122365764655
Industrial Dermatosis	hsa00620	Pyruvate metabolism	0.0269912735765392	ALDH2	0.0420122365764655
Industrial Dermatosis	hsa05332	Graft-versus-host disease	0.0276589755675655	HLA-DMA	0.0420122365764655
Industrial Dermatosis	hsa00380	Tryptophan metabolism	0.0283263338547531	ALDH2	0.0420122365764655
Industrial Dermatosis	hsa00071	Fatty acid degradation	0.0289933485560712	ALDH2	0.0420122365764655
Industrial Dermatosis	hsa04940	Type I diabetes mellitus	0.0289933485560712	HLA-DMA	0.0420122365764655
Industrial Dermatosis	hsa00280	Valine, leucine and isoleucine degradation	0.0296600197894691	ALDH2	0.0420122365764655
Industrial Dermatosis	hsa00310	Lysine degradation	0.0296600197894691	ALDH2	0.0420122365764655
Industrial Dermatosis	hsa04672	Intestinal immune network for IgA production	0.0323232724021314	HLA-DMA	0.0420122365764655
Industrial Dermatosis	hsa00561	Glycerolipid metabolism	0.0336528409661296	ALDH2	0.0420122365764655
Industrial Dermatosis	hsa05320	Autoimmune thyroid disease	0.0349810389587348	HLA-DMA	0.0420122365764655
Industrial Dermatosis	hsa00330	Arginine and proline metabolism	0.0363078673221632	ALDH2	0.0420122365764655
Industrial Dermatosis	hsa05150	Staphylococcus aureus infection	0.0369707681872896	HLA-DMA	0.0420122365764655
Industrial Dermatosis	hsa00010	Glycolysis / Gluconeogenesis	0.0435809832740012	ALDH2	0.0473706339934795
Industrial Dermatosis	hsa05416	Viral myocarditis	0.0468733005382516	HLA-DMA	0.0481878445853614
Industrial Dermatosis	hsa05140	Leishmaniasis	0.0481878445853614	HLA-DMA	0.0481878445853614
Very poor growth	hsa00190	Oxidative phosphorylation	4.99745686204024e-07	NDUFA1, NDUFB3, NDUFB9, NDUFS1, NDUFS2, NDUFS3, NDUFV1, NDUFS4, NDUFS6, NDUFV2, TCIRG1, ATP6V0A4, NDUFA11	7.99593097926439e-06
Very poor growth	hsa05012	Parkinson's disease	2.83864745485748e-06	NDUFA1, NDUFB3, NDUFB9, NDUFS1, NDUFS2, NDUFS3, NDUFV1, NDUFS4, NDUFS6, NDUFV2, HTRA2, NDUFA11	2.27091796388598e-05
Very poor growth	hsa01100	Metabolic pathways	4.53075358463851e-06	ACACA, ADSL, ALOX12B, CYP11B2, CYP19A1, CYP27B1, DGUOK, DPYD, DPYS, HADH, HLCS, NDST1, NDUFA1, NDUFB3, NDUFB9, NDUFS1, NDUFS2, NDUFS3, NDUFV1, NDUFS4, NDUFS6, NDUFV2, PAFAH1B1, PAH, PRPS1, SPR, TAT, SUCLG1, TCIRG1, FTCD, LIAS, PHGDH, ATP6V0A4, PNPO, AGK, PIGO, PIGY, CYP2R1, NDUFA11, GLYCTK	2.41640191180721e-05
Very poor growth	hsa05016	Huntington's disease	9.11965765853685e-05	NDUFA1, NDUFB3, NDUFB9, NDUFS1, NDUFS2, NDUFS3, NDUFV1, NDUFS4, NDUFS6, NDUFV2, SIN3A, NDUFA11	0.000364786306341474
Very poor growth	hsa05010	Alzheimer's disease	0.000175026593779979	NDUFA1, NDUFB3, NDUFB9, NDUFS1, NDUFS2, NDUFS3, NDUFV1, NDUFS4, NDUFS6, NDUFV2, NDUFA11	0.000560085100095932
Very poor growth	hsa04142	Lysosome	0.00135987964912038	AP1S1, CTNS, LIPA, MAN2B1, TCIRG1, SLC17A5, ATP6V0A4, MCOLN1	0.00319272931755508
Very poor growth	hsa03450	Non-homologous end-joining	0.00139681907643035	LIG4, XRCC4, NHEJ1	0.00319272931755508
Very poor growth	hsa05110	Vibrio cholerae infection	0.00262712505242053	ACTB, ACTG1, GNAS, TCIRG1, ATP6V0A4	0.00525425010484106
Very poor growth	hsa00400	Phenylalanine, tyrosine and tryptophan biosynthesis	0.00306091024758631	PAH, TAT	0.00544161821793122
Very poor growth	hsa00100	Steroid biosynthesis	0.0043774430845913	CYP27B1, LIPA, CYP2R1	0.00700390893534607
Very poor growth	hsa04122	Sulfur relay system	0.0129919328233148	MOCS1, MOCS2	0.0188973568339124
Very poor growth	hsa05216	Thyroid cancer	0.014506700409433	BRAF, KRAS, PAX8	0.0193422672125774
Very poor growth	hsa00770	Pantothenate and CoA biosynthesis	0.0323154539483751	DPYD, DPYS	0.0385945634224574
Very poor growth	hsa00780	Biotin metabolism	0.0354641436879716	HLCS	0.0385945634224574
Very poor growth	hsa00360	Phenylalanine metabolism	0.0362038235922145	PAH, TAT	0.0385945634224574
Very poor growth	hsa05219	Bladder cancer	0.0385945634224574	BRAF, FGFR3, KRAS	0.0385945634224574
Primary Hypothyroidism	hsa04080	Neuroactive ligand-receptor interaction	0.0120676348910811	TRHR, TSHB	0.0481878445853614
Primary Hypothyroidism	hsa05320	Autoimmune thyroid disease	0.0349810389587348	TSHB	0.0481878445853614
Primary Hypothyroidism	hsa05212	Pancreatic cancer	0.0468733005382516	STAT1	0.0481878445853614
Primary Hypothyroidism	hsa05140	Leishmaniasis	0.0481878445853614	STAT1	0.0481878445853614
Benign neoplasm of skin	hsa05216	Thyroid cancer	0.000140599726134488	CTNNB1, NTRK1	0.00182779643974834
Benign neoplasm of skin	hsa05200	Pathways in cancer	0.000651507781483612	CTNNB1, FGFR3, NTRK1	0.00423480057964348
Benign neoplasm of skin	hsa04144	Endocytosis	0.00669090044528847	FGFR3, NTRK1	0.0289939019295834
Benign neoplasm of skin	hsa04010	MAPK signaling pathway	0.0117256139262367	FGFR3, NTRK1	0.0381082452602693
Benign neoplasm of skin	hsa05219	Bladder cancer	0.0283263338547531	FGFR3	0.0495010284076379
Benign neoplasm of skin	hsa05213	Endometrial cancer	0.0349810389587348	CTNNB1	0.0495010284076379
Benign neoplasm of skin	hsa05217	Basal cell carcinoma	0.0369707681872896	CTNNB1	0.0495010284076379
Benign neoplasm of skin	hsa05130	Pathogenic Escherichia coli infection	0.0376333269983061	CTNNB1	0.0495010284076379
Benign neoplasm of skin	hsa05210	Colorectal cancer	0.0416015033170906	CTNNB1	0.0495010284076379
Benign neoplasm of skin	hsa05100	Bacterial invasion of epithelial cells	0.0468733005382516	CTNNB1	0.0495010284076379
Benign neoplasm of skin	hsa04622	RIG-I-like receptor signaling pathway	0.0475307426485889	CYLD	0.0495010284076379
Benign neoplasm of skin	hsa04520	Adherens junction	0.0488446064659301	CTNNB1	0.0495010284076379
Benign neoplasm of skin	hsa05412	Arrhythmogenic right ventricular cardiomyopathy (ARVC)	0.0495010284076379	CTNNB1	0.0495010284076379
Osteoma	hsa04916	Melanogenesis	0.000293269675810989	CTNNB1, GNAS	0.00762501157108572
Osteoma	hsa05216	Thyroid cancer	0.00985885540271836	CTNNB1	0.0404682308042598
Osteoma	hsa04962	Vasopressin-regulated water reabsorption	0.0149390992126086	GNAS	0.0404682308042598
Osteoma	hsa04742	Taste transduction	0.0176432198431953	GNAS	0.0404682308042598
Osteoma	hsa05213	Endometrial cancer	0.0176432198431953	CTNNB1	0.0404682308042598
Osteoma	hsa05110	Vibrio cholerae infection	0.0183186692688107	GNAS	0.0404682308042598
Osteoma	hsa05217	Basal cell carcinoma	0.0186563068718139	CTNNB1	0.0404682308042598
Osteoma	hsa05130	Pathogenic Escherichia coli infection	0.0189938864016135	CTNNB1	0.0404682308042598
Osteoma	hsa05210	Colorectal cancer	0.0210181440431467	CTNNB1	0.0404682308042598
Osteoma	hsa05100	Bacterial invasion of epithelial cells	0.0237139021324828	CTNNB1	0.0404682308042598
Osteoma	hsa04730	Long-term depression	0.0237139021324828	GNAS	0.0404682308042598
Osteoma	hsa04976	Bile secretion	0.0240506105642356	GNAS	0.0404682308042598
Osteoma	hsa04520	Adherens junction	0.0247238532081322	CTNNB1	0.0404682308042598
Osteoma	hsa04971	Gastric acid secretion	0.0250603874202756	GNAS	0.0404682308042598
Osteoma	hsa05412	Arrhythmogenic right ventricular cardiomyopathy (ARVC)	0.0250603874202756	CTNNB1	0.0404682308042598
Osteoma	hsa04970	Salivary secretion	0.0301014318180526	GNAS	0.0404682308042598
Osteoma	hsa05215	Prostate cancer	0.0301014318180526	CTNNB1	0.0404682308042598
Osteoma	hsa05414	Dilated cardiomyopathy	0.0304370368589456	GNAS	0.0404682308042598
Osteoma	hsa04540	Gap junction	0.0304370368589456	GNAS	0.0404682308042598
Osteoma	hsa04912	GnRH signaling pathway	0.0341248594773667	GNAS	0.0404682308042598
Osteoma	hsa04972	Pancreatic secretion	0.0341248594773667	GNAS	0.0404682308042598
Osteoma	hsa05142	Chagas disease (American trypanosomiasis)	0.035129409745125	GNAS	0.0404682308042598
Osteoma	hsa05146	Amoebiasis	0.0357988195576144	GNAS	0.0404682308042598
Osteoma	hsa04270	Vascular smooth muscle contraction	0.0391423842278754	GNAS	0.0407080795969904
Osteoma	hsa04670	Leukocyte transendothelial migration	0.0391423842278754	CTNNB1	0.0407080795969904
Osteoma	hsa04530	Tight junction	0.0444800084740419	CTNNB1	0.0444800084740419
Epigastric pain	hsa05100	Bacterial invasion of epithelial cells	0.000140246785561097	CTNNB1, MET	0.00144985558936577
Epigastric pain	hsa04520	Adherens junction	0.000152616377827976	CTNNB1, MET	0.00144985558936577
Epigastric pain	hsa04510	Focal adhesion	0.00115565674230469	CTNNB1, MET	0.0073191593679297
Epigastric pain	hsa05200	Pathways in cancer	0.00307642793585884	CTNNB1, MET	0.0146130326953295
Epigastric pain	hsa05216	Thyroid cancer	0.00985885540271836	CTNNB1	0.0340105257846598
Epigastric pain	hsa05144	Malaria	0.0173054080205831	MET	0.0340105257846598
Epigastric pain	hsa05213	Endometrial cancer	0.0176432198431953	CTNNB1	0.0340105257846598
Epigastric pain	hsa05217	Basal cell carcinoma	0.0186563068718139	CTNNB1	0.0340105257846598
Epigastric pain	hsa05130	Pathogenic Escherichia coli infection	0.0189938864016135	CTNNB1	0.0340105257846598
Epigastric pain	hsa05210	Colorectal cancer	0.0210181440431467	CTNNB1	0.0340105257846598
Epigastric pain	hsa05120	Epithelial cell signaling in Helicobacter pylori infection	0.0230403110493677	MET	0.0340105257846598
Epigastric pain	hsa05211	Renal cell carcinoma	0.0237139021324828	MET	0.0340105257846598
Epigastric pain	hsa05218	Melanoma	0.0240506105642356	MET	0.0340105257846598
Epigastric pain	hsa05412	Arrhythmogenic right ventricular cardiomyopathy (ARVC)	0.0250603874202756	CTNNB1	0.0340105257846598
Epigastric pain	hsa05215	Prostate cancer	0.0301014318180526	CTNNB1	0.0381284803028666
Epigastric pain	hsa04916	Melanogenesis	0.0341248594773667	CTNNB1	0.0405232706293729
Epigastric pain	hsa04670	Leukocyte transendothelial migration	0.0391423842278754	CTNNB1	0.0437473706076255
Epigastric pain	hsa04360	Axon guidance	0.0434803363553468	MET	0.0444800084740419
Epigastric pain	hsa04530	Tight junction	0.0444800084740419	CTNNB1	0.0444800084740419
Small intestine carcinoma	hsa05213	Endometrial cancer	0.00075700760381875	CTNNB1, ERBB2	0.00741802647345319
Small intestine carcinoma	hsa05210	Colorectal cancer	0.00107587208480385	CTNNB1, MSH2	0.00741802647345319
Small intestine carcinoma	hsa04520	Adherens junction	0.00148955533004825	CTNNB1, ERBB2	0.00741802647345319
Small intestine carcinoma	hsa05200	Pathways in cancer	0.00156168978388488	CTNNB1, ERBB2, MSH2	0.00741802647345319
Small intestine carcinoma	hsa05215	Prostate cancer	0.00220744007811093	CTNNB1, ERBB2	0.00838827229682153
Small intestine carcinoma	hsa04510	Focal adhesion	0.0107960152266947	CTNNB1, ERBB2	0.0341873815512
Small intestine carcinoma	hsa03430	Mismatch repair	0.0194480792641036	MSH2	0.0468221647967879
Small intestine carcinoma	hsa00053	Ascorbate and aldarate metabolism	0.0219623137813125	UGT1A1	0.0468221647967879
Small intestine carcinoma	hsa05216	Thyroid cancer	0.0244713882500173	CTNNB1	0.0468221647967879
Small intestine carcinoma	hsa00040	Pentose and glucuronate interconversions	0.0269753106169021	UGT1A1	0.0468221647967879
Small intestine carcinoma	hsa05219	Bladder cancer	0.0352846107478649	ERBB2	0.0468221647967879
Small intestine carcinoma	hsa00860	Porphyrin and chlorophyll metabolism	0.0361124084046798	UGT1A1	0.0468221647967879
Small intestine carcinoma	hsa00514	Other types of O-glycan biosynthesis	0.038592392462833	UGT1A1	0.0468221647967879
Small intestine carcinoma	hsa00983	Drug metabolism - other enzymes	0.043537046797464	UGT1A1	0.0468221647967879
Small intestine carcinoma	hsa00500	Starch and sucrose metabolism	0.0451807360629308	UGT1A1	0.0468221647967879
Small intestine carcinoma	hsa05223	Non-small cell lung cancer	0.0451807360629308	ERBB2	0.0468221647967879
Small intestine carcinoma	hsa05217	Basal cell carcinoma	0.0460017328504948	CTNNB1	0.0468221647967879
Small intestine carcinoma	hsa05130	Pathogenic Escherichia coli infection	0.0468221647967879	CTNNB1	0.0468221647967879
Small intestine carcinoma	hsa00140	Steroid hormone biosynthesis	0.0468221647967879	UGT1A1	0.0468221647967879
Childhood Hepatocellular Carcinoma	hsa05100	Bacterial invasion of epithelial cells	0.000417489365915214	CTNNB1, MET	0.00363324266643755
Childhood Hepatocellular Carcinoma	hsa04520	Adherens junction	0.000454155333304694	CTNNB1, MET	0.00363324266643755
Childhood Hepatocellular Carcinoma	hsa04510	Focal adhesion	0.00338896782876295	CTNNB1, MET	0.0180744950867357
Childhood Hepatocellular Carcinoma	hsa05200	Pathways in cancer	0.00888949766432845	CTNNB1, MET	0.0355579906573138
Childhood Hepatocellular Carcinoma	hsa05216	Thyroid cancer	0.0147530250283059	CTNNB1	0.0398477039851204
Childhood Hepatocellular Carcinoma	hsa05144	Malaria	0.0258476654248697	MET	0.0398477039851204
Childhood Hepatocellular Carcinoma	hsa05213	Endometrial cancer	0.0263499784196662	CTNNB1	0.0398477039851204
Childhood Hepatocellular Carcinoma	hsa05217	Basal cell carcinoma	0.0278558812917985	CTNNB1	0.0398477039851204
Childhood Hepatocellular Carcinoma	hsa05130	Pathogenic Escherichia coli infection	0.0283575036440731	CTNNB1	0.0398477039851204
Childhood Hepatocellular Carcinoma	hsa05210	Colorectal cancer	0.0313636144827795	CTNNB1	0.0398477039851204
Childhood Hepatocellular Carcinoma	hsa05120	Epithelial cell signaling in Helicobacter pylori infection	0.0343635186254103	MET	0.0398477039851204
Childhood Hepatocellular Carcinoma	hsa04610	Complement and coagulation cascades	0.0348628996707688	F2	0.0398477039851204
Childhood Hepatocellular Carcinoma	hsa05211	Renal cell carcinoma	0.0353621085157666	MET	0.0398477039851204
Childhood Hepatocellular Carcinoma	hsa05218	Melanoma	0.0358611451900989	MET	0.0398477039851204
Childhood Hepatocellular Carcinoma	hsa05412	Arrhythmogenic right ventricular cardiomyopathy (ARVC)	0.0373572224860503	CTNNB1	0.0398477039851204
Childhood Hepatocellular Carcinoma	hsa05215	Prostate cancer	0.0448143979963705	CTNNB1	0.0448143979963705
Familial Exudative Vitreoretinopathy	hsa04310	Wnt signaling pathway	2.05715695677753e-07	CTNNB1, LRP5, FZD5, FZD1, FZD4	1.42019754487915e-06
Familial Exudative Vitreoretinopathy	hsa05217	Basal cell carcinoma	2.36699590813192e-07	CTNNB1, FZD5, FZD1, FZD4	1.42019754487915e-06
Familial Exudative Vitreoretinopathy	hsa04916	Melanogenesis	2.78030265571323e-06	CTNNB1, FZD5, FZD1, FZD4	1.11212106228529e-05
Familial Exudative Vitreoretinopathy	hsa05200	Pathways in cancer	9.82457374751591e-06	CTNNB1, VEGFA, FZD5, FZD1, FZD4	2.94737212425477e-05
Familial Exudative Vitreoretinopathy	hsa00360	Phenylalanine metabolism	0.0201108745648373	MAOA	0.0433452192159445
Familial Exudative Vitreoretinopathy	hsa04510	Focal adhesion	0.0216726096079723	CTNNB1, VEGFA	0.0433452192159445
Familial Exudative Vitreoretinopathy	hsa00340	Histidine metabolism	0.0340971646844729	MAOA	0.0490555435097548
Familial Exudative Vitreoretinopathy	hsa05216	Thyroid cancer	0.0340971646844729	CTNNB1	0.0490555435097548
Familial Exudative Vitreoretinopathy	hsa00260	Glycine, serine and threonine metabolism	0.037566877396557	MAOA	0.0490555435097548
Familial Exudative Vitreoretinopathy	hsa00350	Tyrosine metabolism	0.0479119923681243	MAOA	0.0490555435097548
Familial Exudative Vitreoretinopathy	hsa00380	Tryptophan metabolism	0.0490555435097548	MAOA	0.0490555435097548
Familial Exudative Vitreoretinopathy	hsa05219	Bladder cancer	0.0490555435097548	VEGFA	0.0490555435097548
Vascular calcification	hsa00511	Other glycan degradation	0.00578525249589912	GBA	0.0375905811304134
Vascular calcification	hsa05216	Thyroid cancer	0.00985885540271836	CTNNB1	0.0375905811304134
Vascular calcification	hsa00600	Sphingolipid metabolism	0.0135856451404401	GBA	0.0375905811304134
Vascular calcification	hsa05213	Endometrial cancer	0.0176432198431953	CTNNB1	0.0375905811304134
Vascular calcification	hsa05217	Basal cell carcinoma	0.0186563068718139	CTNNB1	0.0375905811304134
Vascular calcification	hsa05130	Pathogenic Escherichia coli infection	0.0189938864016135	CTNNB1	0.0375905811304134
Vascular calcification	hsa05210	Colorectal cancer	0.0210181440431467	CTNNB1	0.0375905811304134
Vascular calcification	hsa05100	Bacterial invasion of epithelial cells	0.0237139021324828	CTNNB1	0.0375905811304134
Vascular calcification	hsa04520	Adherens junction	0.0247238532081322	CTNNB1	0.0375905811304134
Vascular calcification	hsa05412	Arrhythmogenic right ventricular cardiomyopathy (ARVC)	0.0250603874202756	CTNNB1	0.0375905811304134
Vascular calcification	hsa05215	Prostate cancer	0.0301014318180526	CTNNB1	0.0410474070246172
Vascular calcification	hsa04916	Melanogenesis	0.0341248594773667	CTNNB1	0.0426560743467083
Vascular calcification	hsa04670	Leukocyte transendothelial migration	0.0391423842278754	CTNNB1	0.0437271308763091
Vascular calcification	hsa04142	Lysosome	0.0408119888178885	GBA	0.0437271308763091
Vascular calcification	hsa04530	Tight junction	0.0444800084740419	CTNNB1	0.0444800084740419
Transitional cell dysplasia	hsa05200	Pathways in cancer	0.00307642793585884	CTNNB1, FGFR3	0.0350845423883858
Transitional cell dysplasia	hsa05216	Thyroid cancer	0.00985885540271836	CTNNB1	0.0350845423883858
Transitional cell dysplasia	hsa05219	Bladder cancer	0.0142624883229305	FGFR3	0.0350845423883858
Transitional cell dysplasia	hsa05213	Endometrial cancer	0.0176432198431953	CTNNB1	0.0350845423883858
Transitional cell dysplasia	hsa05217	Basal cell carcinoma	0.0186563068718139	CTNNB1	0.0350845423883858
Transitional cell dysplasia	hsa05130	Pathogenic Escherichia coli infection	0.0189938864016135	CTNNB1	0.0350845423883858
Transitional cell dysplasia	hsa05210	Colorectal cancer	0.0210181440431467	CTNNB1	0.0350845423883858
Transitional cell dysplasia	hsa05100	Bacterial invasion of epithelial cells	0.0237139021324828	CTNNB1	0.0350845423883858
Transitional cell dysplasia	hsa04520	Adherens junction	0.0247238532081322	CTNNB1	0.0350845423883858
Transitional cell dysplasia	hsa05412	Arrhythmogenic right ventricular cardiomyopathy (ARVC)	0.0250603874202756	CTNNB1	0.0350845423883858
Transitional cell dysplasia	hsa05215	Prostate cancer	0.0301014318180526	CTNNB1	0.038310913222976
Transitional cell dysplasia	hsa04916	Melanogenesis	0.0341248594773667	CTNNB1	0.0398123360569278
Transitional cell dysplasia	hsa04670	Leukocyte transendothelial migration	0.0391423842278754	CTNNB1	0.0421533368607889
Transitional cell dysplasia	hsa04530	Tight junction	0.0444800084740419	CTNNB1	0.0444800084740419
Nephrogenic rest, intralobar	hsa04670	Leukocyte transendothelial migration	0.00114699188781539	CTNNB1, MMP2	0.0124420569490928
Nephrogenic rest, intralobar	hsa04310	Wnt signaling pathway	0.00191416260755273	CTNNB1, SFRP4	0.0124420569490928
Nephrogenic rest, intralobar	hsa05200	Pathways in cancer	0.00888949766432845	CTNNB1, MMP2	0.0385211565454233
Nephrogenic rest, intralobar	hsa05216	Thyroid cancer	0.0147530250283059	CTNNB1	0.0404703243598879
Nephrogenic rest, intralobar	hsa05219	Bladder cancer	0.0213190718392827	MMP2	0.0404703243598879
Nephrogenic rest, intralobar	hsa05213	Endometrial cancer	0.0263499784196662	CTNNB1	0.0404703243598879
Nephrogenic rest, intralobar	hsa05217	Basal cell carcinoma	0.0278558812917985	CTNNB1	0.0404703243598879
Nephrogenic rest, intralobar	hsa05130	Pathogenic Escherichia coli infection	0.0283575036440731	CTNNB1	0.0404703243598879
Nephrogenic rest, intralobar	hsa05210	Colorectal cancer	0.0313636144827795	CTNNB1	0.0404703243598879
Nephrogenic rest, intralobar	hsa05100	Bacterial invasion of epithelial cells	0.0353621085157666	CTNNB1	0.0404703243598879
Nephrogenic rest, intralobar	hsa04520	Adherens junction	0.0368587021455459	CTNNB1	0.0404703243598879
Nephrogenic rest, intralobar	hsa05412	Arrhythmogenic right ventricular cardiomyopathy (ARVC)	0.0373572224860503	CTNNB1	0.0404703243598879
Nephrogenic rest, intralobar	hsa05215	Prostate cancer	0.0448143979963705	CTNNB1	0.0448143979963705
Adenoid Cystic Carcinoma	hsa05219	Bladder cancer	4.52876268789545e-20	CCND1, CDH1, CDKN2A, DAPK1, EGFR, ERBB2, HRAS, KRAS, MDM2, MMP2, MMP9, MAPK1, MAPK3, MAP2K2, TP53, VEGFC, RASSF1	2.80783286649518e-18
Adenoid Cystic Carcinoma	hsa05200	Pathways in cancer	1.19733146764629e-19	CCND1, CDH1, CDK2, CDKN2A, CREBBP, CTNNB1, DAPK1, EGFR, EP300, ERBB2, FGF2, FN1, MTOR, HIF1A, HRAS, KIT, KRAS, MDM2, MMP2, MMP9, NFKB1, NOS2, NTRK1, PIK3CA, MAPK1, MAPK3, MAP2K2, PTEN, SKP2, TGFB1, TP53, VEGFC, FGF16, RASSF1, WNT5B	3.71172754970351e-18
Adenoid Cystic Carcinoma	hsa05215	Prostate cancer	2.24947765772959e-16	CCND1, CDK2, CREBBP, CTNNB1, EGFR, EP300, ERBB2, MTOR, HRAS, INSRR, KRAS, MDM2, NFKB1, PIK3CA, MAPK1, MAPK3, MAP2K2, PTEN, TP53	4.64892049264116e-15
Adenoid Cystic Carcinoma	hsa05213	Endometrial cancer	8.20686579566061e-14	CCND1, CDH1, CTNNB1, EGFR, ERBB2, FOXO3, HRAS, KRAS, PIK3CA, MAPK1, MAPK3, MAP2K2, PTEN, TP53	1.27206419832739e-12
Adenoid Cystic Carcinoma	hsa05218	Melanoma	4.9246208897067e-13	CCND1, CDH1, CDKN2A, EGFR, FGF2, HRAS, KRAS, MDM2, PIK3CA, MAPK1, MAPK3, MAP2K2, PTEN, TP53, FGF16	6.10652990323631e-12
Adenoid Cystic Carcinoma	hsa05223	Non-small cell lung cancer	3.26911785983886e-12	CCND1, CDKN2A, EGFR, ERBB2, FOXO3, HRAS, KRAS, PIK3CA, MAPK1, MAPK3, MAP2K2, TP53, RASSF1	3.37808845516682e-11
Adenoid Cystic Carcinoma	hsa05216	Thyroid cancer	2.21483718687187e-11	CCND1, CDH1, CTNNB1, HRAS, KRAS, NTRK1, MAPK1, MAPK3, MAP2K2, TP53	1.96171293694366e-10
Adenoid Cystic Carcinoma	hsa05214	Glioma	4.14794434996385e-11	CCND1, CDKN2A, EGFR, MTOR, HRAS, KRAS, MDM2, PIK3CA, MAPK1, MAPK3, MAP2K2, PTEN, TP53	3.21465687122198e-10
Adenoid Cystic Carcinoma	hsa05212	Pancreatic cancer	1.61848667120503e-09	CCND1, CDKN2A, EGFR, ERBB2, KRAS, NFKB1, PIK3CA, MAPK1, MAPK3, TGFB1, TP53, VEGFC	1.11495748460791e-08
Adenoid Cystic Carcinoma	hsa04110	Cell cycle	2.04648179459672e-09	ATM, CCND1, CDK2, CDKN2A, CREBBP, EP300, SFN, MDM2, PCNA, PRKDC, SKP2, TGFB1, TP53, SMC1A, ESPL1	1.26881871264996e-08
Adenoid Cystic Carcinoma	hsa05220	Chronic myeloid leukemia	2.68046770457893e-09	CCND1, CDKN2A, HRAS, KRAS, MDM2, NFKB1, PIK3CA, MAPK1, MAPK3, MAP2K2, TGFB1, TP53	1.51080906985358e-08
Adenoid Cystic Carcinoma	hsa05211	Renal cell carcinoma	2.10616360769589e-08	CREBBP, EP300, HIF1A, HRAS, KRAS, PIK3CA, MAPK1, MAPK3, MAP2K2, TGFB1, VEGFC	1.08818453064288e-07
Adenoid Cystic Carcinoma	hsa05221	Acute myeloid leukemia	3.20531638605225e-08	CCND1, MTOR, HRAS, KIT, KRAS, NFKB1, PIK3CA, MAPK1, MAPK3, MAP2K2	1.52868935334799e-07
Adenoid Cystic Carcinoma	hsa04115	p53 signaling pathway	1.84520294432095e-07	ATM, CCND1, CDK2, CDKN2A, SFN, MDM2, PTEN, TP53, TP73, PPM1D	8.17161303913564e-07
Adenoid Cystic Carcinoma	hsa04722	Neurotrophin signaling pathway	1.99875820124579e-07	FOXO3, HRAS, KRAS, NFKB1, NGF, NTRK1, NTRK3, PIK3CA, MAPK1, MAPK3, MAP2K2, TP53, TP73	8.26153389848262e-07
Adenoid Cystic Carcinoma	hsa04012	ErbB signaling pathway	1.93692428820997e-06	EGFR, ERBB2, EREG, MTOR, HRAS, KRAS, PIK3CA, MAPK1, MAPK3, MAP2K2	7.50558161681363e-06
Adenoid Cystic Carcinoma	hsa04520	Adherens junction	3.60355288537896e-06	CDH1, CREBBP, CTNNB1, EGFR, EP300, ERBB2, MAPK1, MAPK3, SNAI1	1.31423693466762e-05
Adenoid Cystic Carcinoma	hsa04916	Melanogenesis	7.61943486867335e-06	CREBBP, CTNNB1, EP300, HRAS, KIT, KRAS, MAPK1, MAPK3, MAP2K2, WNT5B	2.62447201032082e-05
Adenoid Cystic Carcinoma	hsa05210	Colorectal cancer	9.13841456867879e-06	CCND1, CTNNB1, KRAS, PIK3CA, MAPK1, MAPK3, TGFB1, TP53	2.98200896451624e-05
Adenoid Cystic Carcinoma	hsa05222	Small cell lung cancer	1.28844336803731e-05	CCND1, CDK2, FN1, NFKB1, NOS2, PIK3CA, PTEN, SKP2, TP53	3.99417444091565e-05
Adenoid Cystic Carcinoma	hsa04320	Dorso-ventral axis formation	4.47940215390103e-05	EGFR, KRAS, NOTCH1, MAPK1, MAPK3	0.000132249015972316
Adenoid Cystic Carcinoma	hsa04810	Regulation of actin cytoskeleton	6.35343311138162e-05	EGFR, FGF2, FGFR4, FN1, HRAS, INSRR, ITGB4, KRAS, PIK3CA, MAPK1, MAPK3, MAP2K2, FGF16	0.0001790512967753
Adenoid Cystic Carcinoma	hsa04330	Notch signaling pathway	0.000135710166039797	JAG1, CREBBP, EP300, NOTCH1, DTX4, MAML3	0.00036582740410728
Adenoid Cystic Carcinoma	hsa04510	Focal adhesion	0.000146101615630109	CCND1, CTNNB1, EGFR, ERBB2, FN1, HRAS, ITGB4, PIK3CA, MAPK1, MAPK3, PTEN, VEGFC	0.000377429173711115
Adenoid Cystic Carcinoma	hsa04010	MAPK signaling pathway	0.000175123227007904	EGFR, FGF2, FGFR4, HRAS, KRAS, NFKB1, NGF, NTRK1, MAPK1, MAPK3, MAP2K2, TGFB1, TP53, FGF16	0.000410943805549032
Adenoid Cystic Carcinoma	hsa04720	Long-term potentiation	0.000178959399190707	CREBBP, EP300, HRAS, KRAS, MAPK1, MAPK3, MAP2K2	0.000410943805549032
Adenoid Cystic Carcinoma	hsa04730	Long-term depression	0.000178959399190707	GUCY1A1, HRAS, KRAS, NOS1, MAPK1, MAPK3, MAP2K2	0.000410943805549032
Adenoid Cystic Carcinoma	hsa04150	mTOR signaling pathway	0.00024004909540782	MTOR, HIF1A, PIK3CA, MAPK1, MAPK3, VEGFC	0.000531537282688744
Adenoid Cystic Carcinoma	hsa04662	B cell receptor signaling pathway	0.000276219160743895	HRAS, KRAS, NFKB1, PIK3CA, MAPK1, MAPK3, MAP2K2	0.000590537516073154
Adenoid Cystic Carcinoma	hsa05020	Prion diseases	0.000294428789662308	NCAM1, NOTCH1, MAPK1, MAPK3, MAP2K2	0.000608486165302104
Adenoid Cystic Carcinoma	hsa04910	Insulin signaling pathway	0.000564631893456206	ACACB, MTOR, HRAS, KRAS, PIK3CA, MAPK1, MAPK3, MAP2K2, PYGB	0.00112926378691241
Adenoid Cystic Carcinoma	hsa04210	Apoptosis	0.000687236680722103	ATM, NFKB1, NGF, NTRK1, PIK3CA, TP53, TNFSF10	0.00131778379661427
Adenoid Cystic Carcinoma	hsa04960	Aldosterone-regulated sodium reabsorption	0.000701401053036627	SFN, KRAS, PIK3CA, MAPK1, MAPK3	0.00131778379661427
Adenoid Cystic Carcinoma	hsa04540	Gap junction	0.000842542030159814	EGFR, GUCY1A1, HRAS, KRAS, MAPK1, MAPK3, MAP2K2	0.00153640017264437
Adenoid Cystic Carcinoma	hsa04912	GnRH signaling pathway	0.00166283675634195	EGFR, HRAS, KRAS, MMP2, MAPK1, MAPK3, MAP2K2	0.00294559653980574
Adenoid Cystic Carcinoma	hsa04370	VEGF signaling pathway	0.00184897525031453	HRAS, KRAS, PIK3CA, MAPK1, MAPK3, MAP2K2	0.00318434626443058
Adenoid Cystic Carcinoma	hsa04514	Cell adhesion molecules (CAMs)	0.00194061091326592	ALCAM, CDH1, CDH5, VCAN, NCAM1, SDC1, SDC2, SPN	0.00325183450331046
Adenoid Cystic Carcinoma	hsa05160	Hepatitis C	0.00203494068803265	EGFR, HRAS, KRAS, NFKB1, PIK3CA, MAPK1, MAPK3, TP53	0.00332016638573748
Adenoid Cystic Carcinoma	hsa04664	Fc epsilon RI signaling pathway	0.00225550079020255	HRAS, KRAS, PIK3CA, MAPK1, MAPK3, MAP2K2	0.0035856679228861
Adenoid Cystic Carcinoma	hsa04660	T cell receptor signaling pathway	0.00244446751438188	HRAS, KRAS, NFKB1, PIK3CA, MAPK1, MAPK3, MAP2K2	0.00378892464729192
Adenoid Cystic Carcinoma	hsa04350	TGF-beta signaling pathway	0.0030785518531366	CREBBP, EP300, ID1, MAPK1, MAPK3, TGFB1	0.00465537109498706
Adenoid Cystic Carcinoma	hsa04512	ECM-receptor interaction	0.00326702370049899	CD44, FN1, HSPG2, ITGB4, SDC1, SDC2	0.00482274927216517
Adenoid Cystic Carcinoma	hsa04310	Wnt signaling pathway	0.00409859941667383	CCND1, CREBBP, CTNNB1, EP300, MMP7, TP53, DKK2, WNT5B	0.00590960846125064
Adenoid Cystic Carcinoma	hsa04062	Chemokine signaling pathway	0.00499761884210584	FOXO3, HRAS, JAK3, KRAS, NFKB1, PIK3CA, MAPK1, MAPK3, CXCR4	0.00704209927751278
Adenoid Cystic Carcinoma	hsa05140	Leishmaniasis	0.00768704279491696	NFKB1, NOS2, MAPK1, MAPK3, TGFB1	0.0105910367396634
Adenoid Cystic Carcinoma	hsa04650	Natural killer cell mediated cytotoxicity	0.00866091630347195	HRAS, KRAS, PIK3CA, MAPK1, MAPK3, MAP2K2, TNFSF10	0.0115145852077739
Adenoid Cystic Carcinoma	hsa05142	Chagas disease (American trypanosomiasis)	0.00872879846395763	NFKB1, NOS2, PIK3CA, MAPK1, MAPK3, TGFB1	0.0115145852077739
Adenoid Cystic Carcinoma	hsa04930	Type II diabetes mellitus	0.00900331687538398	MTOR, PIK3CA, MAPK1, MAPK3	0.011629284297371
Adenoid Cystic Carcinoma	hsa04670	Leukocyte transendothelial migration	0.014482125052405	CDH5, CTNNB1, MMP2, MMP9, PIK3CA, CXCR4	0.0183243214948798
Adenoid Cystic Carcinoma	hsa04914	Progesterone-mediated oocyte maturation	0.0158543727408613	CDK2, KRAS, PIK3CA, MAPK1, MAPK3	0.019659422198668
Adenoid Cystic Carcinoma	hsa04621	NOD-like receptor signaling pathway	0.0172352117997583	NFKB1, MAPK1, MAPK3, ERBIN	0.0209526104232356
Adenoid Cystic Carcinoma	hsa03450	Non-homologous end-joining	0.0202148956250135	PRKDC, XRCC4	0.0238528505681667
Adenoid Cystic Carcinoma	hsa05131	Shigellosis	0.0203903400018199	CD44, NFKB1, MAPK1, MAPK3	0.0238528505681667
Adenoid Cystic Carcinoma	hsa04144	Endocytosis	0.0218843519348977	EGFR, FGFR4, HRAS, KIT, MDM2, NTRK1, TGFB1, CXCR4	0.0251264781474752
Adenoid Cystic Carcinoma	hsa04380	Osteoclast differentiation	0.0224716193146179	CYLD, NFKB1, PIK3CA, MAPK1, MAPK3, TGFB1	0.0253316435910238
Adenoid Cystic Carcinoma	hsa04360	Axon guidance	0.0232488690696038	EPHB2, HRAS, KRAS, MAPK1, MAPK3, CXCR4	0.0257398193270614
Adenoid Cystic Carcinoma	hsa04530	Tight junction	0.0256890042903947	CTNNB1, HRAS, KRAS, PTEN, MAGI1, MAGI2	0.0274606597586978
Adenoid Cystic Carcinoma	hsa05145	Toxoplasmosis	0.0256890042903947	NFKB1, NOS2, PIK3CA, MAPK1, MAPK3, TGFB1	0.0274606597586978
Adenoid Cystic Carcinoma	hsa04620	Toll-like receptor signaling pathway	0.0306240551530181	NFKB1, PIK3CA, MAPK1, MAPK3, MAP2K2	0.0321812104997818
Adenoid Cystic Carcinoma	hsa05100	Bacterial invasion of epithelial cells	0.0318907363317012	CDH1, CTNNB1, FN1, PIK3CA	0.0329537608760913
Adenoid Cystic Carcinoma	hsa05146	Amoebiasis	0.0353300769594224	FN1, NFKB1, NOS2, PIK3CA, TGFB1	0.0359092585489212
Adenoid Cystic Carcinoma	hsa04114	Oocyte meiosis	0.0431900781684881	CDK2, MAPK1, MAPK3, SMC1A, ESPL1	0.0431900781684881
Nephrogenic rest, perilobar	hsa05216	Thyroid cancer	0.00494121656159496	CTNNB1	0.0220650877491905
Nephrogenic rest, perilobar	hsa05213	Endometrial cancer	0.00886011245527352	CTNNB1	0.0220650877491905
Nephrogenic rest, perilobar	hsa05217	Basal cell carcinoma	0.00937127278923144	CTNNB1	0.0220650877491905
Nephrogenic rest, perilobar	hsa05130	Pathogenic Escherichia coli infection	0.00954165956721764	CTNNB1	0.0220650877491905
Nephrogenic rest, perilobar	hsa05210	Colorectal cancer	0.0105639802351337	CTNNB1	0.0220650877491905
Nephrogenic rest, perilobar	hsa05100	Bacterial invasion of epithelial cells	0.011927074459022	CTNNB1	0.0220650877491905
Nephrogenic rest, perilobar	hsa04520	Adherens junction	0.0124382347929801	CTNNB1	0.0220650877491905
Nephrogenic rest, perilobar	hsa05412	Arrhythmogenic right ventricular cardiomyopathy (ARVC)	0.012608621570966	CTNNB1	0.0220650877491905
Nephrogenic rest, perilobar	hsa05215	Prostate cancer	0.0151644232407567	CTNNB1	0.0235891028189549
Nephrogenic rest, perilobar	hsa04916	Melanogenesis	0.0172090645765888	CTNNB1	0.0240926904072243
Nephrogenic rest, perilobar	hsa04670	Leukocyte transendothelial migration	0.0197648662463792	CTNNB1	0.0251552843135735
Nephrogenic rest, perilobar	hsa04530	Tight junction	0.0224910546941557	CTNNB1	0.0262395638098483
Nephrogenic rest, perilobar	hsa04310	Wnt signaling pathway	0.0255580166979043	CTNNB1	0.0275240179823584
Nephrogenic rest, perilobar	hsa04510	Focal adhesion	0.0340773555972058	CTNNB1	0.0340773555972058
Biphasic Pulmonary Blastoma	hsa05216	Thyroid cancer	0.00494121656159496	CTNNB1	0.0220650877491905
Biphasic Pulmonary Blastoma	hsa05213	Endometrial cancer	0.00886011245527352	CTNNB1	0.0220650877491905
Biphasic Pulmonary Blastoma	hsa05217	Basal cell carcinoma	0.00937127278923144	CTNNB1	0.0220650877491905
Biphasic Pulmonary Blastoma	hsa05130	Pathogenic Escherichia coli infection	0.00954165956721764	CTNNB1	0.0220650877491905
Biphasic Pulmonary Blastoma	hsa05210	Colorectal cancer	0.0105639802351337	CTNNB1	0.0220650877491905
Biphasic Pulmonary Blastoma	hsa05100	Bacterial invasion of epithelial cells	0.011927074459022	CTNNB1	0.0220650877491905
Biphasic Pulmonary Blastoma	hsa04520	Adherens junction	0.0124382347929801	CTNNB1	0.0220650877491905
Biphasic Pulmonary Blastoma	hsa05412	Arrhythmogenic right ventricular cardiomyopathy (ARVC)	0.012608621570966	CTNNB1	0.0220650877491905
Biphasic Pulmonary Blastoma	hsa05215	Prostate cancer	0.0151644232407567	CTNNB1	0.0235891028189549
Biphasic Pulmonary Blastoma	hsa04916	Melanogenesis	0.0172090645765888	CTNNB1	0.0240926904072243
Biphasic Pulmonary Blastoma	hsa04670	Leukocyte transendothelial migration	0.0197648662463792	CTNNB1	0.0251552843135735
Biphasic Pulmonary Blastoma	hsa04530	Tight junction	0.0224910546941557	CTNNB1	0.0262395638098483
Biphasic Pulmonary Blastoma	hsa04310	Wnt signaling pathway	0.0255580166979043	CTNNB1	0.0275240179823584
Biphasic Pulmonary Blastoma	hsa04510	Focal adhesion	0.0340773555972058	CTNNB1	0.0340773555972058
Exudative vitreoretinopathy 1	hsa04310	Wnt signaling pathway	1.63707637051606e-05	CTNNB1, LRP5, FZD4	0.000196449164461927
Exudative vitreoretinopathy 1	hsa05217	Basal cell carcinoma	0.000257158031844338	CTNNB1, FZD4	0.00154294819106603
Exudative vitreoretinopathy 1	hsa04916	Melanogenesis	0.000869911738220325	CTNNB1, FZD4	0.0034796469528813
Exudative vitreoretinopathy 1	hsa05200	Pathways in cancer	0.00888949766432845	CTNNB1, FZD4	0.0266684929929853
Exudative vitreoretinopathy 1	hsa05216	Thyroid cancer	0.0147530250283059	CTNNB1	0.0354072600679341
Exudative vitreoretinopathy 1	hsa05213	Endometrial cancer	0.0263499784196662	CTNNB1	0.0407533336211458
Exudative vitreoretinopathy 1	hsa05130	Pathogenic Escherichia coli infection	0.0283575036440731	CTNNB1	0.0407533336211458
Exudative vitreoretinopathy 1	hsa05210	Colorectal cancer	0.0313636144827795	CTNNB1	0.0407533336211458
Exudative vitreoretinopathy 1	hsa05100	Bacterial invasion of epithelial cells	0.0353621085157666	CTNNB1	0.0407533336211458
Exudative vitreoretinopathy 1	hsa04520	Adherens junction	0.0368587021455459	CTNNB1	0.0407533336211458
Exudative vitreoretinopathy 1	hsa05412	Arrhythmogenic right ventricular cardiomyopathy (ARVC)	0.0373572224860503	CTNNB1	0.0407533336211458
Exudative vitreoretinopathy 1	hsa05215	Prostate cancer	0.0448143979963705	CTNNB1	0.0448143979963705
MENTAL RETARDATION, AUTOSOMAL DOMINANT 19	hsa05216	Thyroid cancer	0.00494121656159496	CTNNB1	0.0220650877491905
MENTAL RETARDATION, AUTOSOMAL DOMINANT 19	hsa05213	Endometrial cancer	0.00886011245527352	CTNNB1	0.0220650877491905
MENTAL RETARDATION, AUTOSOMAL DOMINANT 19	hsa05217	Basal cell carcinoma	0.00937127278923144	CTNNB1	0.0220650877491905
MENTAL RETARDATION, AUTOSOMAL DOMINANT 19	hsa05130	Pathogenic Escherichia coli infection	0.00954165956721764	CTNNB1	0.0220650877491905
MENTAL RETARDATION, AUTOSOMAL DOMINANT 19	hsa05210	Colorectal cancer	0.0105639802351337	CTNNB1	0.0220650877491905
MENTAL RETARDATION, AUTOSOMAL DOMINANT 19	hsa05100	Bacterial invasion of epithelial cells	0.011927074459022	CTNNB1	0.0220650877491905
MENTAL RETARDATION, AUTOSOMAL DOMINANT 19	hsa04520	Adherens junction	0.0124382347929801	CTNNB1	0.0220650877491905
MENTAL RETARDATION, AUTOSOMAL DOMINANT 19	hsa05412	Arrhythmogenic right ventricular cardiomyopathy (ARVC)	0.012608621570966	CTNNB1	0.0220650877491905
MENTAL RETARDATION, AUTOSOMAL DOMINANT 19	hsa05215	Prostate cancer	0.0151644232407567	CTNNB1	0.0235891028189549
MENTAL RETARDATION, AUTOSOMAL DOMINANT 19	hsa04916	Melanogenesis	0.0172090645765888	CTNNB1	0.0240926904072243
MENTAL RETARDATION, AUTOSOMAL DOMINANT 19	hsa04670	Leukocyte transendothelial migration	0.0197648662463792	CTNNB1	0.0251552843135735
MENTAL RETARDATION, AUTOSOMAL DOMINANT 19	hsa04530	Tight junction	0.0224910546941557	CTNNB1	0.0262395638098483
MENTAL RETARDATION, AUTOSOMAL DOMINANT 19	hsa04310	Wnt signaling pathway	0.0255580166979043	CTNNB1	0.0275240179823584
MENTAL RETARDATION, AUTOSOMAL DOMINANT 19	hsa04510	Focal adhesion	0.0340773555972058	CTNNB1	0.0340773555972058
Pancreaticobiliary Malunion	hsa05216	Thyroid cancer	0.00494121656159496	CTNNB1	0.0220650877491905
Pancreaticobiliary Malunion	hsa05213	Endometrial cancer	0.00886011245527352	CTNNB1	0.0220650877491905
Pancreaticobiliary Malunion	hsa05217	Basal cell carcinoma	0.00937127278923144	CTNNB1	0.0220650877491905
Pancreaticobiliary Malunion	hsa05130	Pathogenic Escherichia coli infection	0.00954165956721764	CTNNB1	0.0220650877491905
Pancreaticobiliary Malunion	hsa05210	Colorectal cancer	0.0105639802351337	CTNNB1	0.0220650877491905
Pancreaticobiliary Malunion	hsa05100	Bacterial invasion of epithelial cells	0.011927074459022	CTNNB1	0.0220650877491905
Pancreaticobiliary Malunion	hsa04520	Adherens junction	0.0124382347929801	CTNNB1	0.0220650877491905
Pancreaticobiliary Malunion	hsa05412	Arrhythmogenic right ventricular cardiomyopathy (ARVC)	0.012608621570966	CTNNB1	0.0220650877491905
Pancreaticobiliary Malunion	hsa05215	Prostate cancer	0.0151644232407567	CTNNB1	0.0235891028189549
Pancreaticobiliary Malunion	hsa04916	Melanogenesis	0.0172090645765888	CTNNB1	0.0240926904072243
Pancreaticobiliary Malunion	hsa04670	Leukocyte transendothelial migration	0.0197648662463792	CTNNB1	0.0251552843135735
Pancreaticobiliary Malunion	hsa04530	Tight junction	0.0224910546941557	CTNNB1	0.0262395638098483
Pancreaticobiliary Malunion	hsa04310	Wnt signaling pathway	0.0255580166979043	CTNNB1	0.0275240179823584
Pancreaticobiliary Malunion	hsa04510	Focal adhesion	0.0340773555972058	CTNNB1	0.0340773555972058
EXUDATIVE VITREORETINOPATHY 7	hsa05216	Thyroid cancer	0.00494121656159496	CTNNB1	0.0220650877491905
EXUDATIVE VITREORETINOPATHY 7	hsa05213	Endometrial cancer	0.00886011245527352	CTNNB1	0.0220650877491905
EXUDATIVE VITREORETINOPATHY 7	hsa05217	Basal cell carcinoma	0.00937127278923144	CTNNB1	0.0220650877491905
EXUDATIVE VITREORETINOPATHY 7	hsa05130	Pathogenic Escherichia coli infection	0.00954165956721764	CTNNB1	0.0220650877491905
EXUDATIVE VITREORETINOPATHY 7	hsa05210	Colorectal cancer	0.0105639802351337	CTNNB1	0.0220650877491905
EXUDATIVE VITREORETINOPATHY 7	hsa05100	Bacterial invasion of epithelial cells	0.011927074459022	CTNNB1	0.0220650877491905
EXUDATIVE VITREORETINOPATHY 7	hsa04520	Adherens junction	0.0124382347929801	CTNNB1	0.0220650877491905
EXUDATIVE VITREORETINOPATHY 7	hsa05412	Arrhythmogenic right ventricular cardiomyopathy (ARVC)	0.012608621570966	CTNNB1	0.0220650877491905
EXUDATIVE VITREORETINOPATHY 7	hsa05215	Prostate cancer	0.0151644232407567	CTNNB1	0.0235891028189549
EXUDATIVE VITREORETINOPATHY 7	hsa04916	Melanogenesis	0.0172090645765888	CTNNB1	0.0240926904072243
EXUDATIVE VITREORETINOPATHY 7	hsa04670	Leukocyte transendothelial migration	0.0197648662463792	CTNNB1	0.0251552843135735
EXUDATIVE VITREORETINOPATHY 7	hsa04530	Tight junction	0.0224910546941557	CTNNB1	0.0262395638098483
EXUDATIVE VITREORETINOPATHY 7	hsa04310	Wnt signaling pathway	0.0255580166979043	CTNNB1	0.0275240179823584
EXUDATIVE VITREORETINOPATHY 7	hsa04510	Focal adhesion	0.0340773555972058	CTNNB1	0.0340773555972058
Microretrognathia	hsa03040	Spliceosome	0.0186605893133446	EIF4A3, SF3B4	0.0368868768253957
Microretrognathia	hsa00100	Steroid biosynthesis	0.0319300510036985	EBP	0.0368868768253957
Microretrognathia	hsa00532	Glycosaminoglycan biosynthesis - chondroitin sulfate / dermatan sulfate	0.0368868768253957	CHST14	0.0368868768253957
Severe viral infections	hsa00240	Pyrimidine metabolism	0.0334548689328458	CTPS1	0.0431469961693753
Severe viral infections	hsa04380	Osteoclast differentiation	0.0431469961693753	NFKB2	0.0431469961693753
Insulin Resistance	hsa04920	Adipocytokine signaling pathway	6.90526817772314e-14	ACACB, AKT2, CD36, IRS1, LEP, LEPR, PPARA, PRKAA1, PRKAA2, SLC2A4, TNF, IRS2, ADIPOQ	2.4168438622031e-12
Insulin Resistance	hsa04930	Type II diabetes mellitus	8.24212473544891e-13	GCK, INS, INSR, IRS1, KCNJ11, PIK3R1, SLC2A4, ABCC8, TNF, IRS2, ADIPOQ	1.44237182870356e-11
Insulin Resistance	hsa04910	Insulin signaling pathway	3.72573416509631e-12	ACACB, AKT2, GCK, INS, INSR, IRS1, LIPE, PIK3R1, PPP1R3A, PRKAA1, PRKAA2, PTPN1, SLC2A4, SREBF1, IRS2	4.34668985927902e-11
Insulin Resistance	hsa04960	Aldosterone-regulated sodium reabsorption	1.66377923944557e-07	HSD11B1, IGF1, INS, INSR, IRS1, PIK3R1, IRS2	1.45580683451488e-06
Insulin Resistance	hsa04150	mTOR signaling pathway	1.25045142718541e-05	AKT2, IGF1, INS, PIK3R1, PRKAA1, PRKAA2	8.75315999029785e-05
Insulin Resistance	hsa05215	Prostate cancer	2.92433982362196e-05	AKT2, AR, EGFR, IGF1, INS, PIK3R1, PTEN	0.000170586489711281
Insulin Resistance	hsa03320	PPAR signaling pathway	6.98402240543447e-05	CD36, PLTP, PPARA, PPARG, SCD, ADIPOQ	0.000331125502772369
Insulin Resistance	hsa05218	Melanoma	7.5685829205113e-05	AKT2, EGFR, IGF1, PIK3R1, PTEN, FGF19	0.000331125502772369
Insulin Resistance	hsa04950	Maturity onset diabetes of the young	0.000106360610897642	GCK, INS, PAX4, HNF1B	0.000413624597935274
Insulin Resistance	hsa05214	Glioma	0.000486919505874387	AKT2, EGFR, IGF1, PIK3R1, PTEN	0.00170421827056035
Insulin Resistance	hsa05142	Chagas disease (American trypanosomiasis)	0.000617737661110357	AKT2, C3, FOS, GNAS, PIK3R1, TNF	0.00196552892171477
Insulin Resistance	hsa05410	Hypertrophic cardiomyopathy (HCM)	0.00148751647696463	IGF1, LMNA, PRKAA1, PRKAA2, TNF	0.00433858972448018
Insulin Resistance	hsa05213	Endometrial cancer	0.00185307944699203	AKT2, EGFR, PIK3R1, PTEN	0.00498906004959392
Insulin Resistance	hsa00140	Steroid hormone biosynthesis	0.00243884765220618	STS, CYP19A1, HSD3B2, HSD11B1	0.00609711913051545
Insulin Resistance	hsa04630	Jak-STAT signaling pathway	0.00475482470603177	AKT2, CTF1, GH1, LEP, LEPR, PIK3R1	0.0106160969154083
Insulin Resistance	hsa04140	Regulation of autophagy	0.00485307287561522	INS, PRKAA1, PRKAA2	0.0106160969154083
Insulin Resistance	hsa05200	Pathways in cancer	0.00540698628482461	AKT2, AR, EGFR, FOS, IGF1, PIK3R1, PPARG, PTEN, FGF19	0.0111320305864036
Insulin Resistance	hsa04940	Type I diabetes mellitus	0.00937906996846256	CPE, INS, TNF	0.0176063007046771
Insulin Resistance	hsa04380	Osteoclast differentiation	0.00955770609682474	AKT2, FOS, PIK3R1, PPARG, TNF	0.0176063007046771
Insulin Resistance	hsa04914	Progesterone-mediated oocyte maturation	0.0112381695357873	AKT2, IGF1, INS, PIK3R1	0.0191899229575427
Insulin Resistance	hsa05160	Hepatitis C	0.0115139537745256	AKT2, EGFR, PIK3R1, PPARA, TNF	0.0191899229575427
Insulin Resistance	hsa05414	Dilated cardiomyopathy	0.013121075234977	GNAS, IGF1, LMNA, TNF	0.020874437873827
Insulin Resistance	hsa04510	Focal adhesion	0.0157540508522969	AKT2, CAV1, EGFR, IGF1, PIK3R1, PTEN	0.0239735556447996
Insulin Resistance	hsa05223	Non-small cell lung cancer	0.0174174489757914	AKT2, EGFR, PIK3R1	0.0254004464230291
Insulin Resistance	hsa04620	Toll-like receptor signaling pathway	0.0199394641521478	AKT2, FOS, PIK3R1, TNF	0.0279152498130069
Insulin Resistance	hsa04660	T cell receptor signaling pathway	0.0240389789797733	AKT2, FOS, PIK3R1, TNF	0.0323601640112333
Insulin Resistance	hsa05210	Colorectal cancer	0.0250786335336696	AKT2, FOS, PIK3R1	0.032509339765868
Insulin Resistance	hsa05212	Pancreatic cancer	0.0342840410596208	AKT2, EGFR, PIK3R1	0.042855051324526
Insulin Resistance	hsa05140	Leishmaniasis	0.0368247341303138	C3, FOS, TNF	0.0444436446400339
Insulin Resistance	hsa04520	Adherens junction	0.0381306210812707	EGFR, INSR, PTPN1	0.0444857245948158
Insulin Resistance	hsa04722	Neurotrophin signaling pathway	0.0402199064875976	AKT2, IRS1, PIK3R1, IRS2	0.0446392702647137
Insulin Resistance	hsa04662	B cell receptor signaling pathway	0.0408130470991668	AKT2, FOS, PIK3R1	0.0446392702647137
Insulin Resistance	hsa04370	VEGF signaling pathway	0.0421893975541574	AKT2, NOS3, PIK3R1	0.0447463307392578
Insulin Resistance	hsa03410	Base excision repair	0.0443119101287214	POLD1, NEIL1	0.0456152016030956
Insulin Resistance	hsa04664	Fc epsilon RI signaling pathway	0.0464577534389722	AKT2, PIK3R1, TNF	0.0464577534389722
Fascioliasis	hsa04612	Antigen processing and presentation	0.000492350792669798	CTSB, CTSL	0.00393880634135838
Fascioliasis	hsa04142	Lysosome	0.00124773132580218	CTSB, CTSL	0.00499092530320873
Fascioliasis	hsa00471	D-Glutamine and D-glutamate metabolism	0.00204359613695537	GLUD1	0.00544958969854766
Fascioliasis	hsa00910	Nitrogen metabolism	0.0117126627094161	GLUD1	0.0187402603350657
Fascioliasis	hsa04964	Proximal tubule bicarbonate reclamation	0.0117126627094161	GLUD1	0.0187402603350657
Fascioliasis	hsa00250	Alanine, aspartate and glutamate metabolism	0.0162708650467921	GLUD1	0.0216944867290561
Fascioliasis	hsa00330	Arginine and proline metabolism	0.0273540863234356	GLUD1	0.0312618129410693
Fascioliasis	hsa05323	Rheumatoid arthritis	0.0458057685670105	CTSL	0.0458057685670105
alpha-Mannosidosis	hsa04142	Lysosome	1.72021695350534e-07	CTSB, LAMP1, MAN2B1, NPC2	3.44043390701069e-07
alpha-Mannosidosis	hsa00511	Other glycan degradation	0.0115389938910598	MAN2B1	0.0115389938910598
Meleda Disease	hsa05145	Toxoplasmosis	4.62336110291011e-05	HLA-DOA, JAK1, PIK3CA, STAT3	0.000739737776465618
Meleda Disease	hsa05212	Pancreatic cancer	0.000183673941783899	JAK1, PIK3CA, STAT3	0.00146939153427119
Meleda Disease	hsa05160	Hepatitis C	0.00124179110322478	JAK1, PIK3CA, STAT3	0.00662288588386547
Meleda Disease	hsa04630	Jak-STAT signaling pathway	0.00189151088628723	JAK1, PIK3CA, STAT3	0.00756604354514893
Meleda Disease	hsa04672	Intestinal immune network for IgA production	0.00282698397068714	HLA-DOA, CXCL12	0.0088982729001222
Meleda Disease	hsa04062	Chemokine signaling pathway	0.00333685233754582	PIK3CA, CXCL12, STAT3	0.0088982729001222
Meleda Disease	hsa05221	Acute myeloid leukemia	0.00396725527265542	PIK3CA, STAT3	0.00906801205178381
Meleda Disease	hsa04610	Complement and coagulation cascades	0.00576822340229815	KLKB1, PLAU	0.0111406818048392
Meleda Disease	hsa05140	Leishmaniasis	0.00626742321739254	HLA-DOA, JAK1	0.0111406818048392
Meleda Disease	hsa04612	Antigen processing and presentation	0.00696292612802447	CTSB, HLA-DOA	0.0111406818048392
Meleda Disease	hsa05323	Rheumatoid arthritis	0.009868942532316	HLA-DOA, CXCL12	0.0143548255015505
Meleda Disease	hsa05200	Pathways in cancer	0.0152138272532327	JAK1, PIK3CA, STAT3	0.0193389881818985
Meleda Disease	hsa04670	Leukocyte transendothelial migration	0.0157129278977926	PIK3CA, CXCL12	0.0193389881818985
Meleda Disease	hsa04380	Osteoclast differentiation	0.018939534040475	JAK1, PIK3CA	0.0216451817605428
Meleda Disease	hsa05322	Systemic lupus erythematosus	0.0212355868221913	GRIN2B, HLA-DOA	0.0226512926103374
Meleda Disease	hsa05310	Asthma	0.0499936018541421	HLA-DOA	0.0499936018541421
Sparganosis	hsa04612	Antigen processing and presentation	0.012949395126938	CTSB	0.0206168001363094
Sparganosis	hsa04142	Lysosome	0.0206168001363094	CTSB	0.0206168001363094
Necrotizing fasciitis	hsa04142	Lysosome	0.00404765076230762	CTSB, GALNS	0.0202382538115381
Necrotizing fasciitis	hsa00531	Glycosaminoglycan degradation	0.01608772608207	GALNS	0.040219315205175
Necrotizing fasciitis	hsa05219	Bladder cancer	0.0352846107478649	CXCL8	0.048461335331484
Necrotizing fasciitis	hsa05144	Malaria	0.0427143537360477	CXCL8	0.048461335331484
Necrotizing fasciitis	hsa04621	NOD-like receptor signaling pathway	0.048461335331484	CXCL8	0.048461335331484
Keratolytic winter erythema	hsa00100	Steroid biosynthesis	0.0064647670457334	FDFT1	0.0193943011372002
Keratolytic winter erythema	hsa04612	Antigen processing and presentation	0.0257332816249529	CTSB	0.0385999224374294
Keratolytic winter erythema	hsa04142	Lysosome	0.0408119888178885	CTSB	0.0408119888178885
glycosphingolipidoses	hsa04612	Antigen processing and presentation	0.012949395126938	CTSB	0.0206168001363094
glycosphingolipidoses	hsa04142	Lysosome	0.0206168001363094	CTSB	0.0206168001363094
Giardia duodenalis Infection	hsa04612	Antigen processing and presentation	0.012949395126938	CTSB	0.0206168001363094
Giardia duodenalis Infection	hsa04142	Lysosome	0.0206168001363094	CTSB	0.0206168001363094
Malignant neoplasm of salivary gland	hsa05219	Bladder cancer	7.91244832815952e-10	CCND1, CDH1, CDKN1A, DAPK1, EGFR, ERBB2, VEGFA	1.66190054418965e-08
Malignant neoplasm of salivary gland	hsa05200	Pathways in cancer	1.14613830633769e-09	CCND1, CDH1, CDKN1A, DAPK1, EGFR, ERBB2, MET, NFKB1, PPARG, STAT5A, STAT5B, VEGFA, WNT5B	1.66190054418965e-08
Malignant neoplasm of salivary gland	hsa05212	Pancreatic cancer	1.98636691846409e-05	CCND1, EGFR, ERBB2, NFKB1, VEGFA	0.000141517131507576
Malignant neoplasm of salivary gland	hsa05218	Melanoma	2.1295398941614e-05	CCND1, CDH1, CDKN1A, EGFR, MET	0.000141517131507576
Malignant neoplasm of salivary gland	hsa05220	Chronic myeloid leukemia	2.43995054323407e-05	CCND1, CDKN1A, NFKB1, STAT5A, STAT5B	0.000141517131507576
Malignant neoplasm of salivary gland	hsa04012	ErbB signaling pathway	5.72100860700481e-05	CDKN1A, EGFR, ERBB2, STAT5A, STAT5B	0.000264429273700511
Malignant neoplasm of salivary gland	hsa05215	Prostate cancer	6.38277557208129e-05	CCND1, CDKN1A, EGFR, ERBB2, NFKB1	0.000264429273700511
Malignant neoplasm of salivary gland	hsa05213	Endometrial cancer	0.000110511237992319	CCND1, CDH1, EGFR, ERBB2	0.000400603237722155
Malignant neoplasm of salivary gland	hsa05221	Acute myeloid leukemia	0.000158515028450324	CCND1, NFKB1, STAT5A, STAT5B	0.000510770647228822
Malignant neoplasm of salivary gland	hsa04510	Focal adhesion	0.000358019700674754	CCND1, EGFR, ERBB2, ITGB4, MET, VEGFA	0.000958663545522249
Malignant neoplasm of salivary gland	hsa05216	Thyroid cancer	0.000363631000025681	CCND1, CDH1, PPARG	0.000958663545522249
Malignant neoplasm of salivary gland	hsa04520	Adherens junction	0.000413556723319466	CDH1, EGFR, ERBB2, MET	0.000999428748022043
Malignant neoplasm of salivary gland	hsa05223	Non-small cell lung cancer	0.0022718904050426	CCND1, EGFR, ERBB2	0.00506806321124888
Malignant neoplasm of salivary gland	hsa05214	Glioma	0.00385766866194512	CCND1, CDKN1A, EGFR	0.00799088508545775
Malignant neoplasm of salivary gland	hsa05120	Epithelial cell signaling in Helicobacter pylori infection	0.00438234291434871	EGFR, MET, NFKB1	0.0084725296344075
Malignant neoplasm of salivary gland	hsa04320	Dorso-ventral axis formation	0.00608321096865243	EGFR, ETV6	0.0110258198806825
Malignant neoplasm of salivary gland	hsa04060	Cytokine-cytokine receptor interaction	0.00880232956600484	EGFR, MET, CXCL12, VEGFA, CXCR4	0.01501573867142
Malignant neoplasm of salivary gland	hsa04062	Chemokine signaling pathway	0.0131730349703017	NFKB1, CXCL12, STAT5B, CXCR4	0.0212232230077082
Malignant neoplasm of salivary gland	hsa04330	Notch signaling pathway	0.0222139034138947	JAG1, MAML2	0.0319130680649323
Malignant neoplasm of salivary gland	hsa04110	Cell cycle	0.0225439966395503	CCND1, CDKN1A, ESPL1	0.0319130680649323
Malignant neoplasm of salivary gland	hsa04672	Intestinal immune network for IgA production	0.0231094630815027	CXCL12, CXCR4	0.0319130680649323
Malignant neoplasm of salivary gland	hsa04360	Axon guidance	0.024992491594575	MET, CXCL12, CXCR4	0.0329446480110307
Malignant neoplasm of salivary gland	hsa05160	Hepatitis C	0.0275805450654185	CDKN1A, EGFR, NFKB1	0.0347754698650929
Malignant neoplasm of salivary gland	hsa00061	Fatty acid biosynthesis	0.0292957964595579	ACACB	0.0353990873886325
Malignant neoplasm of salivary gland	hsa04630	Jak-STAT signaling pathway	0.0399672935666525	CCND1, STAT5A, STAT5B	0.0462899854437104
Malignant neoplasm of salivary gland	hsa04920	Adipocytokine signaling pathway	0.0439282929826186	ACACB, NFKB1	0.0462899854437104
Malignant neoplasm of salivary gland	hsa04115	p53 signaling pathway	0.0439282929826186	CCND1, CDKN1A	0.0462899854437104
Malignant neoplasm of salivary gland	hsa05100	Bacterial invasion of epithelial cells	0.0462899854437104	CDH1, MET	0.0462899854437104
Malignant neoplasm of salivary gland	hsa05211	Renal cell carcinoma	0.0462899854437104	MET, VEGFA	0.0462899854437104
Early fontanel closure	hsa03420	Nucleotide excision repair	0.0149390992126086	ERCC1	0.0298781984252172
Early fontanel closure	hsa04142	Lysosome	0.0408119888178885	CTSD	0.0408119888178885
Diabetic macular edema	hsa04060	Cytokine-cytokine receptor interaction	9.05422063740745e-06	EPO, IL1B, CCL2, VEGFA, VEGFC	0.000126759088923704
Diabetic macular edema	hsa05323	Rheumatoid arthritis	0.000190920340493963	IL1B, CCL2, VEGFA	0.00133644238345774
Diabetic macular edema	hsa05219	Bladder cancer	0.00136232102457332	VEGFA, VEGFC	0.00583459076022257
Diabetic macular edema	hsa05144	Malaria	0.00200500671057092	IL1B, CCL2	0.00583459076022257
Diabetic macular edema	hsa04150	mTOR signaling pathway	0.0020837824143652	VEGFA, VEGFC	0.00583459076022257
Diabetic macular edema	hsa04621	NOD-like receptor signaling pathway	0.0025870250588818	IL1B, CCL2	0.00603639180405753
Diabetic macular edema	hsa05211	Renal cell carcinoma	0.00374870689732145	VEGFA, VEGFC	0.00656023707031254
Diabetic macular edema	hsa05212	Pancreatic cancer	0.00374870689732145	VEGFA, VEGFC	0.00656023707031254
Diabetic macular edema	hsa04370	VEGF signaling pathway	0.00440582096334469	NOS3, VEGFA	0.00685349927631397
Diabetic macular edema	hsa04640	Hematopoietic cell lineage	0.00586932144305229	EPO, IL1B	0.0082170500202732
Diabetic macular edema	hsa05142	Chagas disease (American trypanosomiasis)	0.00812267716772747	IL1B, CCL2	0.0103379527589259
Diabetic macular edema	hsa04510	Focal adhesion	0.0282557073674415	VEGFA, VEGFC	0.0329649919286818
Diabetic macular edema	hsa05143	African trypanosomiasis	0.0467516081208156	IL1B	0.0467516081208156
Diabetic macular edema	hsa05020	Prion diseases	0.0467516081208156	IL1B	0.0467516081208156
Early closure of the bregma sutures	hsa03420	Nucleotide excision repair	0.0149390992126086	ERCC1	0.0298781984252172
Early closure of the bregma sutures	hsa04142	Lysosome	0.0408119888178885	CTSD	0.0408119888178885
Platelet thrombus	hsa04610	Complement and coagulation cascades	2.57941457434885e-07	F3, SERPINE1, PLG, VWF	1.28970728717443e-06
Platelet thrombus	hsa04512	ECM-receptor interaction	0.00299433308845142	ITGB3, VWF	0.00748583272112856
Platelet thrombus	hsa04510	Focal adhesion	0.0158327005483463	ITGB3, VWF	0.0215767314346647
Platelet thrombus	hsa04614	Renin-angiotensin system	0.0172613851477318	CTSG	0.0215767314346647
Platelet thrombus	hsa04080	Neuroactive ligand-receptor interaction	0.0283635856747013	CTSG, PLG	0.0283635856747013
Secondary malignant neoplasm of kidney	hsa05213	Endometrial cancer	0.0176432198431953	PTEN	0.0376267897725657
Secondary malignant neoplasm of kidney	hsa00562	Inositol phosphate metabolism	0.0193314078582104	PTEN	0.0376267897725657
Secondary malignant neoplasm of kidney	hsa05214	Glioma	0.0220294888756714	PTEN	0.0376267897725657
Secondary malignant neoplasm of kidney	hsa04115	p53 signaling pathway	0.0230403110493677	PTEN	0.0376267897725657
Secondary malignant neoplasm of kidney	hsa05218	Melanoma	0.0240506105642356	PTEN	0.0376267897725657
Secondary malignant neoplasm of kidney	hsa04070	Phosphatidylinositol signaling system	0.0264059435368182	PTEN	0.0376267897725657
Secondary malignant neoplasm of kidney	hsa05222	Small cell lung cancer	0.0287584309224475	PTEN	0.0376267897725657
Secondary malignant neoplasm of kidney	hsa05215	Prostate cancer	0.0301014318180526	PTEN	0.0376267897725657
Secondary malignant neoplasm of kidney	hsa04142	Lysosome	0.0408119888178885	CTSH	0.0444800084740419
Secondary malignant neoplasm of kidney	hsa04530	Tight junction	0.0444800084740419	PTEN	0.0444800084740419
Abnormal rapid eye movement sleep	hsa05310	Asthma	0.000250215526772704	HLA-DQB1, HLA-DRB1	0.00181480614528943
Abnormal rapid eye movement sleep	hsa05330	Allograft rejection	0.000382172985025498	HLA-DQB1, HLA-DRB1	0.00181480614528943
Abnormal rapid eye movement sleep	hsa05332	Graft-versus-host disease	0.000469900033563915	HLA-DQB1, HLA-DRB1	0.00181480614528943
Abnormal rapid eye movement sleep	hsa04940	Type I diabetes mellitus	0.00051710916163728	HLA-DQB1, HLA-DRB1	0.00181480614528943
Abnormal rapid eye movement sleep	hsa04672	Intestinal immune network for IgA production	0.000644852675142165	HLA-DQB1, HLA-DRB1	0.00181480614528943
Abnormal rapid eye movement sleep	hsa05320	Autoimmune thyroid disease	0.00075700760381875	HLA-DQB1, HLA-DRB1	0.00181480614528943
Abnormal rapid eye movement sleep	hsa05150	Staphylococcus aureus infection	0.000846909534468401	HLA-DQB1, HLA-DRB1	0.00181480614528943
Abnormal rapid eye movement sleep	hsa05416	Viral myocarditis	0.00137023560231133	HLA-DQB1, HLA-DRB1	0.00241540430057635
Abnormal rapid eye movement sleep	hsa05140	Leishmaniasis	0.00144924258034581	HLA-DQB1, HLA-DRB1	0.00241540430057635
Abnormal rapid eye movement sleep	hsa04612	Antigen processing and presentation	0.00161372375275213	HLA-DQB1, HLA-DRB1	0.0024205856291282
Abnormal rapid eye movement sleep	hsa05323	Rheumatoid arthritis	0.00230675668598036	HLA-DQB1, HLA-DRB1	0.00314557729906413
Abnormal rapid eye movement sleep	hsa05145	Toxoplasmosis	0.00480214835580172	HLA-DQB1, HLA-DRB1	0.00545540871478565
Abnormal rapid eye movement sleep	hsa04514	Cell adhesion molecules (CAMs)	0.00487378311451206	HLA-DQB1, HLA-DRB1	0.00545540871478565
Abnormal rapid eye movement sleep	hsa05322	Systemic lupus erythematosus	0.00509171480046661	HLA-DQB1, HLA-DRB1	0.00545540871478565
Abnormal rapid eye movement sleep	hsa04145	Phagosome	0.00641177964673064	HLA-DQB1, HLA-DRB1	0.00641177964673064
Pycnodysostosis	hsa04630	Jak-STAT signaling pathway	0.00401542872546169	GH1, IL6R	0.0321234298036935
Pycnodysostosis	hsa04060	Cytokine-cytokine receptor interaction	0.0114721126946527	GH1, IL6R	0.0458884507786109
Pycnodysostosis	hsa04960	Aldosterone-regulated sodium reabsorption	0.0283263338547531	IGF1	0.0475307426485889
Pycnodysostosis	hsa04150	mTOR signaling pathway	0.0349810389587348	IGF1	0.0475307426485889
Pycnodysostosis	hsa05214	Glioma	0.0435809832740012	IGF1	0.0475307426485889
Pycnodysostosis	hsa04115	p53 signaling pathway	0.0455573953273322	IGF1	0.0475307426485889
Pycnodysostosis	hsa04730	Long-term depression	0.0468733005382516	IGF1	0.0475307426485889
Pycnodysostosis	hsa05218	Melanoma	0.0475307426485889	IGF1	0.0475307426485889
Calcific tendinitis	hsa04620	Toll-like receptor signaling pathway	0.000299135069327209	CTSK, SPP1	0.00149567534663605
Calcific tendinitis	hsa04512	ECM-receptor interaction	0.0287584309224475	SPP1	0.0431469961693753
Calcific tendinitis	hsa05323	Rheumatoid arthritis	0.0307725838266362	CTSK	0.0431469961693753
Calcific tendinitis	hsa04142	Lysosome	0.0408119888178885	CTSK	0.0431469961693753
Calcific tendinitis	hsa04380	Osteoclast differentiation	0.0431469961693753	CTSK	0.0431469961693753
Adenocarcinoma of salivary gland	hsa05218	Melanoma	2.20726143279194e-09	CDK4, CDK6, EGFR, FGF1, FGF2, FGF13	4.63524900886308e-08
Adenocarcinoma of salivary gland	hsa05200	Pathways in cancer	9.52559239285619e-07	CDK4, CDK6, EGFR, ERBB2, FGF1, FGF2, FGF13	1.0001872012499e-05
Adenocarcinoma of salivary gland	hsa05223	Non-small cell lung cancer	3.00103760172454e-06	CDK4, CDK6, EGFR, ERBB2	2.10072632120718e-05
Adenocarcinoma of salivary gland	hsa05212	Pancreatic cancer	8.54929530512701e-06	CDK4, CDK6, EGFR, ERBB2	4.48838003519168e-05
Adenocarcinoma of salivary gland	hsa04320	Dorso-ventral axis formation	1.29064639685548e-05	EGFR, NOTCH1, NOTCH3	5.42071486679302e-05
Adenocarcinoma of salivary gland	hsa05219	Bladder cancer	7.17005398885773e-05	CDK4, EGFR, ERBB2	0.000250951889610021
Adenocarcinoma of salivary gland	hsa04330	Notch signaling pathway	0.000100691150471282	JAG2, NOTCH1, NOTCH3	0.000302073451413846
Adenocarcinoma of salivary gland	hsa04010	MAPK signaling pathway	0.000116297237892327	EGFR, FGF1, FGF2, FGF13, RAP1A	0.000305280249467357
Adenocarcinoma of salivary gland	hsa05214	Glioma	0.000265661551676418	CDK4, CDK6, EGFR	0.000619876953911642
Adenocarcinoma of salivary gland	hsa04810	Regulation of actin cytoskeleton	0.000663613997027323	EGFR, FGF1, FGF2, FGF13	0.00139358939375738
Adenocarcinoma of salivary gland	hsa05213	Endometrial cancer	0.00480158191605963	EGFR, ERBB2	0.00916665638520475
Adenocarcinoma of salivary gland	hsa04510	Focal adhesion	0.00683033178320763	EGFR, ERBB2, RAP1A	0.0119530806206133
Adenocarcinoma of salivary gland	hsa04115	p53 signaling pathway	0.00810031477204903	CDK4, CDK6	0.013008751960155
Adenocarcinoma of salivary gland	hsa05220	Chronic myeloid leukemia	0.00929196568582501	CDK4, CDK6	0.013008751960155
Adenocarcinoma of salivary gland	hsa04520	Adherens junction	0.00929196568582501	EGFR, ERBB2	0.013008751960155
Adenocarcinoma of salivary gland	hsa00061	Fatty acid biosynthesis	0.0122104860509131	ACACB	0.0150280051217805
Adenocarcinoma of salivary gland	hsa05222	Small cell lung cancer	0.012451831658828	CDK4, CDK6	0.0150280051217805
Adenocarcinoma of salivary gland	hsa04012	ErbB signaling pathway	0.0130186717744965	EGFR, ERBB2	0.0150280051217805
Adenocarcinoma of salivary gland	hsa05215	Prostate cancer	0.0135967665387538	EGFR, ERBB2	0.0150280051217805
Adenocarcinoma of salivary gland	hsa04110	Cell cycle	0.0254473094554316	CDK4, CDK6	0.0267196749282032
Adenocarcinoma of salivary gland	hsa04020	Calcium signaling pathway	0.0489454471445304	EGFR, ERBB2	0.0489454471445304
Perivascular Epithelioid Cell Neoplasms	hsa04150	mTOR signaling pathway	0.00112907138261751	TSC1, TSC2	0.00673950076564038
Perivascular Epithelioid Cell Neoplasms	hsa04115	p53 signaling pathway	0.00192557164732582	TP53, TSC2	0.00673950076564038
Perivascular Epithelioid Cell Neoplasms	hsa04910	Insulin signaling pathway	0.00773849643908796	TSC1, TSC2	0.0180564916912052
Perivascular Epithelioid Cell Neoplasms	hsa03440	Homologous recombination	0.0282976430368944	RAD51B	0.0410141150433817
Perivascular Epithelioid Cell Neoplasms	hsa05216	Thyroid cancer	0.0292957964595584	TP53	0.0410141150433817
Perivascular Epithelioid Cell Neoplasms	hsa05219	Bladder cancer	0.0421942366599708	TP53	0.0471169904225509
Perivascular Epithelioid Cell Neoplasms	hsa04330	Notch signaling pathway	0.0471169904225509	APH1A	0.0471169904225509
Skull Base Chordoma	hsa05323	Rheumatoid arthritis	0.0155051967967285	CTSK	0.0218095075822118
Skull Base Chordoma	hsa04620	Toll-like receptor signaling pathway	0.0173794513545749	CTSK	0.0218095075822118
Skull Base Chordoma	hsa04142	Lysosome	0.0206168001363094	CTSK	0.0218095075822118
Skull Base Chordoma	hsa04380	Osteoclast differentiation	0.0218095075822118	CTSK	0.0218095075822118
Abnormal pelvis bone ossification	hsa04962	Vasopressin-regulated water reabsorption	0.0149390992126086	DYNC2H1	0.0431469961693753
Abnormal pelvis bone ossification	hsa05323	Rheumatoid arthritis	0.0307725838266362	CTSK	0.0431469961693753
Abnormal pelvis bone ossification	hsa04620	Toll-like receptor signaling pathway	0.0344597676398224	CTSK	0.0431469961693753
Abnormal pelvis bone ossification	hsa04142	Lysosome	0.0408119888178885	CTSK	0.0431469961693753
Abnormal pelvis bone ossification	hsa04380	Osteoclast differentiation	0.0431469961693753	CTSK	0.0431469961693753
Abnormal maturation of the pelvis bone	hsa04962	Vasopressin-regulated water reabsorption	0.0149390992126086	DYNC2H1	0.0431469961693753
Abnormal maturation of the pelvis bone	hsa05323	Rheumatoid arthritis	0.0307725838266362	CTSK	0.0431469961693753
Abnormal maturation of the pelvis bone	hsa04620	Toll-like receptor signaling pathway	0.0344597676398224	CTSK	0.0431469961693753
Abnormal maturation of the pelvis bone	hsa04142	Lysosome	0.0408119888178885	CTSK	0.0431469961693753
Abnormal maturation of the pelvis bone	hsa04380	Osteoclast differentiation	0.0431469961693753	CTSK	0.0431469961693753
vascular aneurysm	hsa05221	Acute myeloid leukemia	0.0193314078582104	STAT3	0.0450332428436676
vascular aneurysm	hsa04920	Adipocytokine signaling pathway	0.0230403110493677	STAT3	0.0450332428436676
vascular aneurysm	hsa05212	Pancreatic cancer	0.0237139021324828	STAT3	0.0450332428436676
vascular aneurysm	hsa04612	Antigen processing and presentation	0.0257332816249529	CTSS	0.0450332428436676
vascular aneurysm	hsa04142	Lysosome	0.0408119888178885	CTSS	0.0451461661871562
vascular aneurysm	hsa05145	Toxoplasmosis	0.0444800084740419	STAT3	0.0451461661871562
vascular aneurysm	hsa05160	Hepatitis C	0.0451461661871562	STAT3	0.0451461661871562
Precursor T cell lymphoblastic leukemia/lymphoblastic lymphoma	hsa04320	Dorso-ventral axis formation	0.000332407651446138	NOTCH1, NOTCH3	0.00232685356012297
Precursor T cell lymphoblastic leukemia/lymphoblastic lymphoma	hsa04330	Notch signaling pathway	0.00128499166750425	NOTCH1, NOTCH3	0.00449747083626489
Precursor T cell lymphoblastic leukemia/lymphoblastic lymphoma	hsa05218	Melanoma	0.00291379253979955	FGFR1, PTEN	0.00679884925953229
Precursor T cell lymphoblastic leukemia/lymphoblastic lymphoma	hsa05215	Prostate cancer	0.0045447807842003	FGFR1, PTEN	0.00795336637235053
Precursor T cell lymphoblastic leukemia/lymphoblastic lymphoma	hsa04670	Leukocyte transendothelial migration	0.0076224546348595	PTPN11, CXCR4	0.0106714364888033
Precursor T cell lymphoblastic leukemia/lymphoblastic lymphoma	hsa04614	Renin-angiotensin system	0.0201108745648373	MME	0.0234626869923102
Precursor T cell lymphoblastic leukemia/lymphoblastic lymphoma	hsa05020	Prion diseases	0.0410259012878366	NOTCH1	0.0410259012878366
Vasculitis, Leukocytoclastic, Cutaneous	hsa05150	Staphylococcus aureus infection	3.29172348418185e-09	FCGR2A, FCGR2B, HLA-DRB1, CFI, FCGR2C	3.62089583260003e-08
Vasculitis, Leukocytoclastic, Cutaneous	hsa05322	Systemic lupus erythematosus	1.79713850862205e-05	FCGR2A, FCGR2B, HLA-DRB1, FCGR2C	9.8842617974213e-05
Vasculitis, Leukocytoclastic, Cutaneous	hsa04145	Phagosome	2.86588065896805e-05	FCGR2A, FCGR2B, HLA-DRB1, FCGR2C	0.000105082290828829
Vasculitis, Leukocytoclastic, Cutaneous	hsa05140	Leishmaniasis	9.48817229852455e-05	FCGR2A, HLA-DRB1, FCGR2C	0.000260924738209425
Vasculitis, Leukocytoclastic, Cutaneous	hsa04666	Fc gamma R-mediated phagocytosis	0.00021025037945601	FCGR2A, FCGR2B, FCGR2C	0.000462550834803223
Vasculitis, Leukocytoclastic, Cutaneous	hsa04380	Osteoclast differentiation	0.000523822868952441	FCGR2A, FCGR2B, FCGR2C	0.000960341926412809
Vasculitis, Leukocytoclastic, Cutaneous	hsa04610	Complement and coagulation cascades	0.00364409236980635	CFI, VWF	0.00572643086683855
Vasculitis, Leukocytoclastic, Cutaneous	hsa04062	Chemokine signaling pathway	0.0254170809755882	CX3CR1, CX3CL1	0.0349484863414338
Vasculitis, Leukocytoclastic, Cutaneous	hsa05310	Asthma	0.0401922078138979	HLA-DRB1	0.0491238095503196
Vasculitis, Leukocytoclastic, Cutaneous	hsa04060	Cytokine-cytokine receptor interaction	0.0474949932040181	CX3CR1, CX3CL1	0.0493643648164874
Vasculitis, Leukocytoclastic, Cutaneous	hsa05330	Allograft rejection	0.0493643648164874	HLA-DRB1	0.0493643648164874
Headache recurrent	hsa04062	Chemokine signaling pathway	0.0322031010393593	CX3CR1	0.0451524961662976
Headache recurrent	hsa04060	Cytokine-cytokine receptor interaction	0.0451524961662976	CX3CR1	0.0451524961662976
Acute otitis media	hsa05142	Chagas disease (American trypanosomiasis)	1.56636896551512e-11	IFNG, IL1B, IL6, IL10, SERPINE1, TGFB1, TNF	4.19139228262605e-10
Acute otitis media	hsa05144	Malaria	2.61962017664128e-11	IFNG, IL1B, IL6, IL10, TGFB1, TNF	4.19139228262605e-10
Acute otitis media	hsa05143	African trypanosomiasis	6.94129546858223e-10	IFNG, IL1B, IL6, IL10, TNF	7.40404849982105e-09
Acute otitis media	hsa05146	Amoebiasis	2.42162660387922e-09	IFNG, IL1B, IL6, IL10, TGFB1, TNF	1.93730128310338e-08
Acute otitis media	hsa04060	Cytokine-cytokine receptor interaction	1.17984792025853e-08	CX3CR1, IFNG, IL1B, IL6, IL10, TGFB1, TNF	7.55102668965462e-08
Acute otitis media	hsa05140	Leishmaniasis	2.92900913266508e-08	IFNG, IL1B, IL10, TGFB1, TNF	1.56213820408804e-07
Acute otitis media	hsa05323	Rheumatoid arthritis	9.62966232622337e-08	IFNG, IL1B, IL6, TGFB1, TNF	4.40213134913068e-07
Acute otitis media	hsa05332	Graft-versus-host disease	2.51921274728509e-07	IFNG, IL1B, IL6, TNF	1.00768509891404e-06
Acute otitis media	hsa05330	Allograft rejection	1.88813695159742e-05	IFNG, IL10, TNF	6.71337582790193e-05
Acute otitis media	hsa04380	Osteoclast differentiation	2.4995017384863e-05	IFNG, IL1B, TGFB1, TNF	7.96022984809162e-05
Acute otitis media	hsa05145	Toxoplasmosis	2.82315836822248e-05	IFNG, IL10, TGFB1, TNF	7.96022984809162e-05
Acute otitis media	hsa04940	Type I diabetes mellitus	2.98508619303436e-05	IFNG, IL1B, TNF	7.96022984809162e-05
Acute otitis media	hsa04672	Intestinal immune network for IgA production	4.16754018596957e-05	IL6, IL10, TGFB1	0.000102585604577712
Acute otitis media	hsa04621	NOD-like receptor signaling pathway	7.37779890989876e-05	IL1B, IL6, TNF	0.000168635403654829
Acute otitis media	hsa05410	Hypertrophic cardiomyopathy (HCM)	0.00021549301270225	IL6, TGFB1, TNF	0.00044660327124754
Acute otitis media	hsa04350	TGF-beta signaling pathway	0.00022330163562377	IFNG, TGFB1, TNF	0.00044660327124754
Acute otitis media	hsa04640	Hematopoietic cell lineage	0.000256376694251327	IL1B, IL6, TNF	0.000482591424473086
Acute otitis media	hsa04620	Toll-like receptor signaling pathway	0.000396823500830091	IL1B, IL6, TNF	0.000705464001475717
Acute otitis media	hsa04660	T cell receptor signaling pathway	0.000469647765279741	IFNG, IL10, TNF	0.000790985709944827
Acute otitis media	hsa05310	Asthma	0.000889380630027723	IL10, TNF	0.00140650424269285
Acute otitis media	hsa05322	Systemic lupus erythematosus	0.000923018409267181	IFNG, IL10, TNF	0.00140650424269285
Acute otitis media	hsa05020	Prion diseases	0.00121167470908188	IL1B, IL6	0.00176243594048274
Acute otitis media	hsa04630	Jak-STAT signaling pathway	0.00135010633788284	IFNG, IL6, IL10	0.00187840881792396
Acute otitis media	hsa05150	Staphylococcus aureus infection	0.00297629443505297	IL10, MBL2	0.00394760828341494
Acute otitis media	hsa04623	Cytosolic DNA-sensing pathway	0.00308406897141792	IL1B, IL6	0.00394760828341494
Acute otitis media	hsa04610	Complement and coagulation cascades	0.00464977081697417	MBL2, SERPINE1	0.00572279485166051
Acute otitis media	hsa04612	Antigen processing and presentation	0.00561726355404531	IFNG, TNF	0.00665749754553518
Acute otitis media	hsa04010	MAPK signaling pathway	0.00644210408671585	IL1B, TGFB1, TNF	0.0073624046705324
Acute otitis media	hsa04210	Apoptosis	0.00730900532342656	IL1B, TNF	0.00806510932240172
Acute otitis media	hsa05414	Dilated cardiomyopathy	0.00780609785716326	TGFB1, TNF	0.00832650438097414
Acute otitis media	hsa04650	Natural killer cell mediated cytotoxicity	0.0172477322404042	IFNG, TNF	0.0178041106997721
Acute otitis media	hsa05010	Alzheimer's disease	0.0254056856987386	IL1B, TNF	0.0254056856987386
Hepatopulmonary Syndrome	hsa04062	Chemokine signaling pathway	0.00163332850382173	CX3CR1, CCL2, CX3CL1	0.00816664251910867
Hepatopulmonary Syndrome	hsa04060	Cytokine-cytokine receptor interaction	0.00430394888881248	CX3CR1, CCL2, CX3CL1	0.0101533464596593
Hepatopulmonary Syndrome	hsa04916	Melanogenesis	0.00767436115415348	EDN1, EDNRB	0.0101533464596593
Hepatopulmonary Syndrome	hsa05142	Chagas disease (American trypanosomiasis)	0.00812267716772747	SERPINE1, CCL2	0.0101533464596593
Hepatopulmonary Syndrome	hsa04020	Calcium signaling pathway	0.0224683824311839	EDNRB, NOS3	0.0224683824311839
Insulin Sensitivity	hsa04920	Adipocytokine signaling pathway	2.46012287415714e-14	ACACB, CD36, IRS1, LEP, LEPR, PPARA, PRKAA1, PRKAA2, SLC2A4, TNF, IRS2, ADIPOQ	5.65828261056142e-13
Insulin Sensitivity	hsa04930	Type II diabetes mellitus	3.40629916530081e-11	INS, INSR, IRS1, KCNJ11, PIK3R1, SLC2A4, TNF, IRS2, ADIPOQ	3.91724404009593e-10
Insulin Sensitivity	hsa04910	Insulin signaling pathway	2.46427716380528e-09	ACACB, INS, INSR, IRS1, PIK3R1, PRKAA1, PRKAA2, PTPN1, SLC2A4, SREBF1, IRS2	1.88927915891738e-08
Insulin Sensitivity	hsa04960	Aldosterone-regulated sodium reabsorption	4.6461669794138e-07	HSD11B1, INS, INSR, IRS1, PIK3R1, IRS2	2.67154601316293e-06
Insulin Sensitivity	hsa03320	PPAR signaling pathway	9.97424415508672e-06	CD36, PLTP, PPARA, PPARG, SCD, ADIPOQ	4.58815231133989e-05
Insulin Sensitivity	hsa05215	Prostate cancer	0.000437793292131055	AR, EGFR, INS, PIK3R1, PTEN	0.00167820761983571
Insulin Sensitivity	hsa04150	mTOR signaling pathway	0.000523979083173766	INS, PIK3R1, PRKAA1, PRKAA2	0.00172164555899952
Insulin Sensitivity	hsa05218	Melanoma	0.00170022633336892	EGFR, PIK3R1, PTEN, FGF19	0.00478297924352783
Insulin Sensitivity	hsa04140	Regulation of autophagy	0.00187160057355437	INS, PRKAA1, PRKAA2	0.00478297924352783
Insulin Sensitivity	hsa04940	Type I diabetes mellitus	0.00368708645040965	CPE, INS, TNF	0.00848029883594219
Insulin Sensitivity	hsa04630	Jak-STAT signaling pathway	0.00515898721525777	CTF1, GH1, LEP, LEPR, PIK3R1	0.0107869732682663
Insulin Sensitivity	hsa05213	Endometrial cancer	0.00630780390023485	EGFR, PIK3R1, PTEN	0.0119548415499615
Insulin Sensitivity	hsa05142	Chagas disease (American trypanosomiasis)	0.00675708435432605	C3, GNAS, PIK3R1, TNF	0.0119548415499615
Insulin Sensitivity	hsa05214	Glioma	0.0116728242861871	EGFR, PIK3R1, PTEN	0.0183428992958049
Insulin Sensitivity	hsa04060	Cytokine-cytokine receptor interaction	0.0119627604103075	CTF1, EGFR, GH1, LEP, LEPR, TNF	0.0183428992958049
Insulin Sensitivity	hsa04520	Adherens junction	0.015962678518124	EGFR, INSR, PTPN1	0.0217962030247615
Insulin Sensitivity	hsa05160	Hepatitis C	0.016110237018302	EGFR, PIK3R1, PPARA, TNF	0.0217962030247615
Insulin Sensitivity	hsa05410	Hypertrophic cardiomyopathy (HCM)	0.0224223685208428	PRKAA1, PRKAA2, TNF	0.0286508042210769
Insulin Sensitivity	hsa05200	Pathways in cancer	0.0300819453623338	AR, EGFR, PIK3R1, PPARG, PTEN, FGF19	0.0364149864912462
Insulin Sensitivity	hsa04020	Calcium signaling pathway	0.0395774845319375	ADRB2, EGFR, GNAS, NOS3	0.0451432281288271
Insulin Sensitivity	hsa05146	Amoebiasis	0.0419478430729406	GNAS, PIK3R1, TNF	0.0451432281288271
Insulin Sensitivity	hsa00061	Fatty acid biosynthesis	0.0431804790797476	ACACB	0.0451432281288271
Insulin Sensitivity	hsa04080	Neuroactive ligand-receptor interaction	0.0471051385652086	ADRB2, GH1, LEP, LEPR, MC4R	0.0471051385652086
Leukocytoclastic vasculitis	hsa05150	Staphylococcus aureus infection	2.36699590813192e-07	FCGR2A, FCGR2B, CFI, FCGR2C	2.13029631731873e-06
Leukocytoclastic vasculitis	hsa04666	Fc gamma R-mediated phagocytosis	0.00013294929286766	FCGR2A, FCGR2B, FCGR2C	0.000598271817904472
Leukocytoclastic vasculitis	hsa04380	Osteoclast differentiation	0.00033268596793011	FCGR2A, FCGR2B, FCGR2C	0.00089538413862382
Leukocytoclastic vasculitis	hsa05322	Systemic lupus erythematosus	0.000397948506055031	FCGR2A, FCGR2B, FCGR2C	0.00089538413862382
Leukocytoclastic vasculitis	hsa04145	Phagosome	0.000563027585675811	FCGR2A, FCGR2B, FCGR2C	0.00101344965421646
Leukocytoclastic vasculitis	hsa04610	Complement and coagulation cascades	0.00275394804697337	CFI, VWF	0.00385114421105135
Leukocytoclastic vasculitis	hsa05140	Leishmaniasis	0.00299533438637327	FCGR2A, FCGR2C	0.00385114421105135
Leukocytoclastic vasculitis	hsa04062	Chemokine signaling pathway	0.0194711428576466	CX3CR1, CX3CL1	0.0219050357148524
Leukocytoclastic vasculitis	hsa04060	Cytokine-cytokine receptor interaction	0.0366972321252167	CX3CR1, CX3CL1	0.0366972321252167
MACULAR DEGENERATION, AGE-RELATED, 12	hsa04062	Chemokine signaling pathway	0.0322031010393593	CX3CR1	0.0451524961662976
MACULAR DEGENERATION, AGE-RELATED, 12	hsa04060	Cytokine-cytokine receptor interaction	0.0451524961662976	CX3CR1	0.0451524961662976
Swine Vesicular Disease	hsa05416	Viral myocarditis	0.000140246785561097	CXADR, CD55	0.000420740356683291
Swine Vesicular Disease	hsa04610	Complement and coagulation cascades	0.0233771356275266	CD55	0.029765768703956
Swine Vesicular Disease	hsa04640	Hematopoietic cell lineage	0.029765768703956	CD55	0.029765768703956
Decreased fertility in males	hsa00140	Steroid hormone biosynthesis	8.23140885011887e-07	CYP11B1, CYP17A1, HSD3B2	1.64628177002377e-06
Decreased fertility in males	hsa01100	Metabolic pathways	0.00712215108267904	CYP11B1, CYP17A1, HSD3B2	0.00712215108267904
Adrenal hyperplasia, congenital, type 5	hsa00140	Steroid hormone biosynthesis	0.0283575036440731	CYP17A1	0.0368587021455459
Adrenal hyperplasia, congenital, type 5	hsa00590	Arachidonic acid metabolism	0.0298613353013162	CYP2B6	0.0368587021455459
Adrenal hyperplasia, congenital, type 5	hsa00830	Retinol metabolism	0.0323642718464757	CYP2B6	0.0368587021455459
Adrenal hyperplasia, congenital, type 5	hsa04920	Adipocytokine signaling pathway	0.0343635186254103	POMC	0.0368587021455459
Adrenal hyperplasia, congenital, type 5	hsa00980	Metabolism of xenobiotics by cytochrome P450	0.0358611451900989	CYP2B6	0.0368587021455459
Adrenal hyperplasia, congenital, type 5	hsa00982	Drug metabolism - cytochrome P450	0.0368587021455459	CYP2B6	0.0368587021455459
Congenital Methemoglobinemia	hsa00020	Citrate cycle (TCA cycle)	0.0101979448357998	DLD	0.0195499489362326
Congenital Methemoglobinemia	hsa00260	Glycine, serine and threonine metabolism	0.0108759494823528	DLD	0.0195499489362326
Congenital Methemoglobinemia	hsa00620	Pyruvate metabolism	0.0135856451404401	DLD	0.0195499489362326
Congenital Methemoglobinemia	hsa00280	Valine, leucine and isoleucine degradation	0.0149390992126086	DLD	0.0195499489362326
Congenital Methemoglobinemia	hsa00520	Amino sugar and nucleotide sugar metabolism	0.0162916241135271	CYB5R3	0.0195499489362326
Congenital Methemoglobinemia	hsa00010	Glycolysis / Gluconeogenesis	0.0220294888756714	DLD	0.0220294888756714
Decreased testosterone level	hsa00140	Steroid hormone biosynthesis	0.0283575036440731	CYP17A1	0.0283575036440731
Decreased testosterone level	hsa04340	Hedgehog signaling pathway	0.0283575036440731	DHH	0.0283575036440731
Primary gonadal insufficiency	hsa03013	RNA transport	5.55440068391401e-07	EIF2B1, EIF2B4, EIF2B3, EIF2B2, EIF2B5	1.1108801367828e-06
Primary gonadal insufficiency	hsa03450	Non-homologous end-joining	0.0175938676152119	XRCC4	0.0175938676152119
Hypoglycemia	hsa04930	Type II diabetes mellitus	2.73653335988167e-15	CACNA1C, MTOR, GCK, INS, INSR, KCNJ11, PIK3CB, PIK3CD, PIK3CG, MAPK8, SLC2A2, SLC2A4, ABCC8, TNF, IRS2, SOCS3, ADIPOQ	1.641920015929e-13
Hypoglycemia	hsa00280	Valine, leucine and isoleucine degradation	2.47176553638366e-13	ACADM, ACADSB, BCKDHA, BCKDHB, DBT, DLD, HSD17B10, HADHA, HADH, HMGCL, HMGCS2, PCCA, PCCB, MCCC1, MCCC2	7.41529660915097e-12
Hypoglycemia	hsa04920	Adipocytokine signaling pathway	1.80195958014127e-12	AKT2, CD36, CPT1A, MTOR, G6PC, PCK1, PCK2, POMC, PPARA, MAPK8, SLC2A1, SLC2A4, TNF, IRS2, SOCS3, ADIPOQ, AKT3	3.60391916028253e-11
Hypoglycemia	hsa04910	Insulin signaling pathway	1.42190611332405e-11	AKT2, FBP1, MTOR, G6PC, GCK, GYS1, HRAS, INS, INSR, PCK1, PCK2, PHKA2, PIK3CB, PIK3CD, PIK3CG, MAPK8, PYGL, SLC2A4, SREBF1, IRS2, SOCS3, AKT3	2.13285916998607e-10
Hypoglycemia	hsa05010	Alzheimer's disease	1.03480719606583e-10	APOE, CACNA1C, GRIN1, GRIN2B, HSD17B10, IL1B, LPL, NDUFA1, NDUFB3, NDUFB9, NDUFS1, NDUFS2, NDUFS3, NDUFV1, NDUFS4, NDUFS6, NDUFV2, TNF, UQCRB, UQCRC2, EIF2AK3, UQCRQ, NDUFA11	1.24176863527899e-09
Hypoglycemia	hsa01100	Metabolic pathways	3.79947974469309e-10	ACADL, ACADM, ACADSB, AGL, ALDOB, BCKDHA, BCKDHB, CKB, CYP2C8, CYP2C9, CYP21A2, DBT, DGUOK, DLD, DNMT1, FAH, FBP1, G6PC, GAD2, GALT, GCDH, GCK, GK, GCLC, GLUD1, HSD17B10, HADHA, HADH, HMGCL, HMGCS2, MPI, MTHFR, NDUFA1, NDUFB3, NDUFB9, NDUFS1, NDUFS2, NDUFS3, NDUFV1, NDUFS4, NDUFS6, NDUFV2, OTC, PC, PCCA, PCCB, PCK1, PCK2, PNMT, TH, UGDH, UQCRB, UQCRC2, HSD17B6, SUCLG1, H6PD, MLYCD, NNT, UQCRQ, CR…	3.79947974469309e-09
Hypoglycemia	hsa05016	Huntington's disease	2.08687760047296e-08	GRIN1, GRIN2B, NDUFA1, NDUFB3, NDUFB9, NDUFS1, NDUFS2, NDUFS3, NDUFV1, NDUFS4, NDUFS6, NDUFV2, SOD2, TFAM, TGM2, TP53, UQCRB, UQCRC2, UQCRQ, NDUFA11, TBPL2	1.78875222897682e-07
Hypoglycemia	hsa03320	PPAR signaling pathway	3.4611247259605e-07	ACADL, ACADM, CD36, CPT1A, CPT2, GK, HMGCS2, LPL, PCK1, PCK2, PPARA, ADIPOQ	2.59584354447038e-06
Hypoglycemia	hsa04150	mTOR signaling pathway	1.1327790620328e-06	AKT2, MTOR, HIF1A, IGF1, INS, PIK3CB, PIK3CD, PIK3CG, VEGFA, AKT3	7.551860413552e-06
Hypoglycemia	hsa05012	Parkinson's disease	2.32414987506925e-06	NDUFA1, NDUFB3, NDUFB9, NDUFS1, NDUFS2, NDUFS3, NDUFV1, NDUFS4, NDUFS6, NDUFV2, TH, UQCRB, UQCRC2, UQCRQ, NDUFA11	1.39448992504155e-05
Hypoglycemia	hsa05214	Glioma	9.40815270264885e-06	AKT2, MTOR, HRAS, IGF1, PIK3CB, PIK3CD, PIK3CG, PTEN, TP53, AKT3	4.9499471747894e-05
Hypoglycemia	hsa05213	Endometrial cancer	9.89989434957881e-06	AKT2, HRAS, PIK3CB, PIK3CD, PIK3CG, PTEN, TP53, AKT3, APC2	4.9499471747894e-05
Hypoglycemia	hsa00190	Oxidative phosphorylation	1.38122282440637e-05	NDUFA1, NDUFB3, NDUFB9, NDUFS1, NDUFS2, NDUFS3, NDUFV1, NDUFS4, NDUFS6, NDUFV2, UQCRB, UQCRC2, UQCRQ, NDUFA11	6.37487457418325e-05
Hypoglycemia	hsa04960	Aldosterone-regulated sodium reabsorption	1.50451154107612e-05	IGF1, INS, INSR, NR3C2, PIK3CB, PIK3CD, PIK3CG, IRS2	6.44790660461195e-05
Hypoglycemia	hsa00071	Fatty acid degradation	1.80547712806603e-05	ACADL, ACADM, ACADSB, CPT1A, CPT2, GCDH, HADHA, HADH	6.53384743614477e-05
Hypoglycemia	hsa05211	Renal cell carcinoma	1.85125677357435e-05	AKT2, ARNT, HIF1A, HRAS, PIK3CB, PIK3CD, PIK3CG, SLC2A1, VEGFA, AKT3	6.53384743614477e-05
Hypoglycemia	hsa05212	Pancreatic cancer	1.85125677357435e-05	AKT2, SMAD3, PIK3CB, PIK3CD, PIK3CG, MAPK8, TP53, VEGFA, AKT3, RALBP1	6.53384743614477e-05
Hypoglycemia	hsa04973	Carbohydrate digestion and absorption	2.15546140737188e-05	AKT2, G6PC, SLC37A4, PIK3CB, PIK3CD, PIK3CG, SLC2A2, AKT3	7.18487135790626e-05
Hypoglycemia	hsa05200	Pathways in cancer	2.56161571329917e-05	AKT2, ARNT, MTOR, GLI2, HIF1A, HRAS, IGF1, IL6, KIT, LAMC2, SMAD3, NFKB2, PIK3CB, PIK3CD, PIK3CG, MAPK8, PTEN, SLC2A1, TP53, VEGFA, AKT3, APC2, RALBP1	8.0893127788395e-05
Hypoglycemia	hsa05215	Prostate cancer	2.86565981528218e-05	AKT2, MTOR, HRAS, IGF1, INS, PIK3CB, PIK3CD, PIK3CG, PTEN, TP53, AKT3	8.59697944584654e-05
Hypoglycemia	hsa05210	Colorectal cancer	4.30921120509371e-05	AKT2, SMAD3, PIK3CB, PIK3CD, PIK3CG, MAPK8, TP53, AKT3, APC2	0.000123120320145535
Hypoglycemia	hsa05160	Hepatitis C	7.29046859045494e-05	AKT2, HRAS, PIK3CB, PIK3CD, PIK3CG, PPARA, MAPK8, TNF, TP53, RIPK1, SOCS3, EIF2AK3, AKT3	0.000198830961557862
Hypoglycemia	hsa05142	Chagas disease (American trypanosomiasis)	0.000122429091822052	AKT2, ACE, IL1B, IL6, SMAD3, PIK3CB, PIK3CD, PIK3CG, MAPK8, TNF, AKT3	0.000319380239535787
Hypoglycemia	hsa05218	Melanoma	0.000127906483249608	AKT2, HRAS, IGF1, PIK3CB, PIK3CD, PIK3CG, PTEN, TP53, AKT3	0.000319766208124019
Hypoglycemia	hsa05221	Acute myeloid leukemia	0.000148143308849998	AKT2, MTOR, HRAS, KIT, PIK3CB, PIK3CD, PIK3CG, AKT3	0.000355543941239996
Hypoglycemia	hsa00640	Propanoate metabolism	0.000201388085079204	ACADM, HADHA, PCCA, PCCB, SUCLG1, MLYCD	0.000464741734798164
Hypoglycemia	hsa04664	Fc epsilon RI signaling pathway	0.000292703462617028	AKT2, CSF2, HRAS, PIK3CB, PIK3CD, PIK3CG, MAPK8, TNF, AKT3	0.000650452139148952
Hypoglycemia	hsa04620	Toll-like receptor signaling pathway	0.000465285639369903	AKT2, IL1B, IL6, PIK3CB, PIK3CD, PIK3CG, MAPK8, TNF, RIPK1, AKT3	0.000997040655792649
Hypoglycemia	hsa04950	Maturity onset diabetes of the young	0.000511422318854956	GCK, HNF4A, INS, SLC2A2, HNF1A	0.00105811514245853
Hypoglycemia	hsa04210	Apoptosis	0.000604212893949887	AKT2, IL1B, PIK3CB, PIK3CD, PIK3CG, TNF, TP53, RIPK1, AKT3	0.00120842578789977
Hypoglycemia	hsa05223	Non-small cell lung cancer	0.000637346678454848	AKT2, HRAS, PIK3CB, PIK3CD, PIK3CG, TP53, AKT3	0.00123357421636422
Hypoglycemia	hsa05220	Chronic myeloid leukemia	0.000829025257213062	AKT2, HRAS, SMAD3, PIK3CB, PIK3CD, PIK3CG, TP53, AKT3	0.00155442235727449
Hypoglycemia	hsa04370	VEGF signaling pathway	0.00108431452335744	AKT2, HRAS, KDR, PIK3CB, PIK3CD, PIK3CG, VEGFA, AKT3	0.001956009346185
Hypoglycemia	hsa04630	Jak-STAT signaling pathway	0.0011084052961715	AKT2, CSF2, GH1, GHR, IL6, PIK3CB, PIK3CD, PIK3CG, PRL, SOCS3, AKT3, SOCS7	0.001956009346185
Hypoglycemia	hsa00650	Butanoate metabolism	0.00122706802327616	GAD2, HADHA, HADH, HMGCL, HMGCS2	0.00204511337212693
Hypoglycemia	hsa00020	Citrate cycle (TCA cycle)	0.00122706802327616	DLD, PC, PCK1, PCK2, SUCLG1	0.00204511337212693
Hypoglycemia	hsa00010	Glycolysis / Gluconeogenesis	0.00194389383870958	ALDOB, DLD, FBP1, G6PC, GCK, PCK1, PCK2	0.00315226027898851
Hypoglycemia	hsa05222	Small cell lung cancer	0.0022441080571544	AKT2, LAMC2, PIK3CB, PIK3CD, PIK3CG, PTEN, TP53, AKT3	0.00354332851129642
Hypoglycemia	hsa04914	Progesterone-mediated oocyte maturation	0.00241739017539776	AKT2, IGF1, INS, PIK3CB, PIK3CD, PIK3CG, MAPK8, AKT3	0.00371906180830425
Hypoglycemia	hsa04012	ErbB signaling pathway	0.0026010030646583	AKT2, MTOR, HRAS, PIK3CB, PIK3CD, PIK3CG, MAPK8, AKT3	0.00390150459698745
Hypoglycemia	hsa04380	Osteoclast differentiation	0.00268072770256214	AKT2, IL1B, NFKB2, PIK3CB, PIK3CD, PIK3CG, MAPK8, TNF, SOCS3, AKT3	0.00392301615009094
Hypoglycemia	hsa00410	beta-Alanine metabolism	0.00277407439971724	ACADM, GAD2, HADHA, MLYCD	0.00396296342816749
Hypoglycemia	hsa00500	Starch and sucrose metabolism	0.00348012859778296	AGL, G6PC, GCK, GYS1, PYGL, UGDH	0.0048559933922553
Hypoglycemia	hsa00310	Lysine degradation	0.00685697586094899	GCDH, HADHA, HADH, SETD2, NSD1	0.0093504216285668
Hypoglycemia	hsa04722	Neurotrophin signaling pathway	0.00817713064395403	AKT2, HRAS, PIK3CB, PIK3CD, PIK3CG, MAPK8, TP53, IRS2, AKT3	0.0109028408586054
Hypoglycemia	hsa05146	Amoebiasis	0.00864129462033921	CSF2, IL1B, IL6, LAMC2, PIK3CB, PIK3CD, PIK3CG, TNF	0.0112712538526164
Hypoglycemia	hsa04510	Focal adhesion	0.00895842664450161	AKT2, HRAS, IGF1, KDR, LAMC2, PIK3CB, PIK3CD, PIK3CG, MAPK8, PTEN, VEGFA, AKT3	0.0114362893334063
Hypoglycemia	hsa04660	T cell receptor signaling pathway	0.00963117804912936	AKT2, CSF2, HRAS, PIK3CB, PIK3CD, PIK3CG, TNF, AKT3	0.0120389725614117
Hypoglycemia	hsa04614	Renin-angiotensin system	0.0105601468114691	AGT, ACE, REN	0.0129307920140438
Hypoglycemia	hsa04662	B cell receptor signaling pathway	0.016912173312518	AKT2, HRAS, PIK3CB, PIK3CD, PIK3CG, AKT3	0.0202946079750215
Hypoglycemia	hsa00062	Fatty acid elongation	0.0190063777124964	HADHA, HADH	0.0223604443676429
Hypoglycemia	hsa00620	Pyruvate metabolism	0.0236229703617732	DLD, PC, PCK1, PCK2	0.027088340547505
Hypoglycemia	hsa00072	Synthesis and degradation of ketone bodies	0.023998388777391	HMGCL, HMGCS2	0.027088340547505
Hypoglycemia	hsa04964	Proximal tubule bicarbonate reclamation	0.0243795064927545	GLUD1, PCK1, PCK2	0.027088340547505
Hypoglycemia	hsa05145	Toxoplasmosis	0.0290047720934504	AKT2, LAMC2, PIK3CB, PIK3CD, PIK3CG, MAPK8, TNF, AKT3	0.0316415695564913
Hypoglycemia	hsa04940	Type I diabetes mellitus	0.0299448461009308	GAD2, IL1B, INS, TNF	0.0320837636795687
Hypoglycemia	hsa04640	Hematopoietic cell lineage	0.0340609794184612	CD36, CSF2, IL1B, IL6, KIT, TNF	0.0358536625457486
Hypoglycemia	hsa00030	Pentose phosphate pathway	0.037177304911465	ALDOB, FBP1, H6PD	0.0378074287235238
Hypoglycemia	hsa00052	Galactose metabolism	0.037177304911465	G6PC, GALT, GCK	0.0378074287235238
Hypoglycemia	hsa00520	Amino sugar and nucleotide sugar metabolism	0.0425092581595321	GALT, GCK, MPI, UGDH	0.0425092581595321
Methemoglobinemia, Type I	hsa00520	Amino sugar and nucleotide sugar metabolism	0.0162916241135271	CYB5R3	0.0206809129525659
Methemoglobinemia, Type I	hsa05131	Shigellosis	0.0206809129525659	DIAPH1	0.0206809129525659
Abnormality of creatine metabolism	hsa00260	Glycine, serine and threonine metabolism	0.0108759494823528	GATM	0.025325181868818
Abnormality of creatine metabolism	hsa00330	Arginine and proline metabolism	0.0183186692688107	GATM	0.025325181868818
Abnormality of creatine metabolism	hsa00140	Steroid hormone biosynthesis	0.0189938864016135	CYP17A1	0.025325181868818
Abnormality of creatine metabolism	hsa01100	Metabolic pathways	0.0370440251791471	CYP17A1, GATM	0.0370440251791471
Absence of secondary sex characteristics	hsa00140	Steroid hormone biosynthesis	0.000345233727556861	CYP11A1, CYP17A1, HSD3B2	0.00189783964302513
Absence of secondary sex characteristics	hsa04080	Neuroactive ligand-receptor interaction	0.000421742142894474	GNRHR, LEP, LEPR, TACR3, KISS1R	0.00189783964302513
Absence of secondary sex characteristics	hsa05218	Melanoma	0.000695588750210688	FGF8, FGFR1, FGF17	0.00208676625063206
Absence of secondary sex characteristics	hsa04010	MAPK signaling pathway	0.00389215128452823	DUSP6, FGF8, FGFR1, FGF17	0.00875734039018852
Absence of secondary sex characteristics	hsa04630	Jak-STAT signaling pathway	0.00650867971487886	LEP, LEPR, SPRY4	0.011715623486782
Absence of secondary sex characteristics	hsa04920	Adipocytokine signaling pathway	0.0126016936694746	LEP, LEPR	0.0189025405042119
Absence of secondary sex characteristics	hsa04810	Regulation of actin cytoskeleton	0.0155266740997472	FGF8, FGFR1, FGF17	0.019962866699675
Absence of secondary sex characteristics	hsa04912	GnRH signaling pathway	0.0266127224752747	GNRH1, GNRHR	0.029939312784684
Absence of secondary sex characteristics	hsa05200	Pathways in cancer	0.0469776170755256	FGF8, FGFR1, FGF17	0.0469776170755256
Enlarged polycystic ovaries	hsa00140	Steroid hormone biosynthesis	1.09980816131673e-07	CYP11B1, CYP17A1, CYP19A1, HSD3B2	2.19961632263347e-07
Enlarged polycystic ovaries	hsa01100	Metabolic pathways	0.0147241951014491	CYP11B1, CYP17A1, CYP19A1, HSD3B2	0.0147241951014491
Decreased serum testosterone level	hsa00140	Steroid hormone biosynthesis	0.0283575036440731	CYP17A1	0.0283575036440731
Decreased serum testosterone level	hsa04340	Hedgehog signaling pathway	0.0283575036440731	DHH	0.0283575036440731
Coronary Artery Vasospasm	hsa05410	Hypertrophic cardiomyopathy (HCM)	0.00109775019232528	ACE, IL6, SGCD	0.00658650115395169
Coronary Artery Vasospasm	hsa04020	Calcium signaling pathway	0.0093915081439267	HTR2A, NOS3, PLCD1	0.0281745244317801
Coronary Artery Vasospasm	hsa05323	Rheumatoid arthritis	0.0218994808376645	IL6, MMP3	0.0355289733297329
Coronary Artery Vasospasm	hsa05142	Chagas disease (American trypanosomiasis)	0.0281011943970206	ACE, IL6	0.0355289733297329
Coronary Artery Vasospasm	hsa04080	Neuroactive ligand-receptor interaction	0.0296074777747774	UTS2R, HTR1B, HTR2A	0.0355289733297329
Coronary Artery Vasospasm	hsa04614	Renin-angiotensin system	0.0426284651658072	ACE	0.0426284651658072
Rectal abscess	hsa04670	Leukocyte transendothelial migration	5.63232508694518e-08	CYBA, CYBB, ITGB2, NCF2, NCF1	2.25293003477807e-07
Rectal abscess	hsa04145	Phagosome	2.27232013333033e-07	CYBA, CYBB, ITGB2, NCF2, NCF1	4.54464026666067e-07
Rectal abscess	hsa05140	Leishmaniasis	7.09015258665957e-07	CYBA, ITGB2, NCF2, NCF1	9.45353678221275e-07
Rectal abscess	hsa04380	Osteoclast differentiation	7.18352362329919e-06	CYBA, CYBB, NCF2, NCF1	7.18352362329919e-06
Perirectal abscess	hsa04670	Leukocyte transendothelial migration	5.63232508694518e-08	CYBA, CYBB, ITGB2, NCF2, NCF1	2.25293003477807e-07
Perirectal abscess	hsa04145	Phagosome	2.27232013333033e-07	CYBA, CYBB, ITGB2, NCF2, NCF1	4.54464026666067e-07
Perirectal abscess	hsa05140	Leishmaniasis	7.09015258665957e-07	CYBA, ITGB2, NCF2, NCF1	9.45353678221275e-07
Perirectal abscess	hsa04380	Osteoclast differentiation	7.18352362329919e-06	CYBA, CYBB, NCF2, NCF1	7.18352362329919e-06
Vomiting	hsa01100	Metabolic pathways	1.49599585939875e-17	ACADL, ACADM, ACADVL, ACAT1, ALAD, ALDOB, ALPL, ARG1, ASL, ASS1, BCKDHA, BCKDHB, BTD, COMT, CPOX, CPS1, CYP2E1, CYP11A1, CYP11B2, DBT, DGUOK, DHCR7, DLD, TYMP, GALC, GALE, GALT, GCDH, HADH, HLCS, HMBS, HMGCS2, HPRT1, HSD3B2, IVD, MPI, MVK, NDUFA1, NDUFB3, NDUFB9, NDUFS1, NDUFS2, NDUFS3, NDUFV1, NDUFS4, NDUFS6, NDUFV2, OTC, PCCA, PCCB, PMM2, POLG, PPOX, PPT1, ALDH18A1, RRM1, SMPD1, DGAT1, ST3GAL5,…	6.13358302353489e-16
Vomiting	hsa00280	Valine, leucine and isoleucine degradation	7.63805741508924e-13	ACADM, ACAT1, BCKDHA, BCKDHB, DBT, DLD, HADH, HMGCS2, IVD, OXCT1, PCCA, PCCB, MCCC1, MCCC2	1.5658017700933e-11
Vomiting	hsa05010	Alzheimer's disease	1.35962067131971e-08	FAS, CASP3, CASP8, CASP9, LPL, MME, NDUFA1, NDUFB3, NDUFB9, NDUFS1, NDUFS2, NDUFS3, NDUFV1, NDUFS4, NDUFS6, NDUFV2, MAPK3, TNFRSF1A, NDUFA11	1.85814825080361e-07
Vomiting	hsa05012	Parkinson's disease	1.29834756986555e-05	CASP3, CASP9, NDUFA1, NDUFB3, NDUFB9, NDUFS1, NDUFS2, NDUFS3, NDUFV1, NDUFS4, NDUFS6, NDUFV2, NDUFA11	0.000133080625911219
Vomiting	hsa05016	Huntington's disease	3.07344532806578e-05	CASP3, CASP8, CASP9, NDUFA1, NDUFB3, NDUFB9, NDUFS1, NDUFS2, NDUFS3, NDUFV1, NDUFS4, NDUFS6, NDUFV2, TP53, NDUFA11	0.000252022516901394
Vomiting	hsa00071	Fatty acid degradation	6.5070206723494e-05	ACADL, ACADM, ACADVL, ACAT1, CPT2, GCDH, HADH	0.000429141933310372
Vomiting	hsa00190	Oxidative phosphorylation	7.32681349554293e-05	NDUFA1, NDUFB3, NDUFB9, NDUFS1, NDUFS2, NDUFS3, NDUFV1, NDUFS4, NDUFS6, NDUFV2, ATP6V0A4, NDUFA11	0.000429141933310372
Vomiting	hsa00330	Arginine and proline metabolism	0.000286414884353153	ARG1, ASL, ASS1, CPS1, OTC, ALDH18A1, NAGS	0.00146787628230991
Vomiting	hsa04960	Aldosterone-regulated sodium reabsorption	0.000461785919431546	KCNJ1, NR3C2, MAPK3, SCNN1A, SCNN1B, SCNN1G	0.00210369141074371
Vomiting	hsa00860	Porphyrin and chlorophyll metabolism	0.000526118197167986	ALAD, CPOX, HMBS, PPOX, UGT1A1, MMAB	0.00215708460838874
Vomiting	hsa00780	Biotin metabolism	0.00058137083654333	BTD, HLCS	0.00216692766347968
Vomiting	hsa05210	Colorectal cancer	0.000677014931113919	BRAF, CASP3, CASP9, CTNNB1, MSH2, MAPK3, TP53	0.00231313434797256
Vomiting	hsa00640	Propanoate metabolism	0.000918874175747418	ACADM, ACAT1, PCCA, PCCB, MLYCD	0.00289798778504955
Vomiting	hsa00072	Synthesis and degradation of ketone bodies	0.00104675647837279	ACAT1, HMGCS2, OXCT1	0.00305865749457743
Vomiting	hsa04115	p53 signaling pathway	0.0011829338259401	FAS, CASP3, CASP8, CASP9, TP53, PPM1D, RRM2B	0.00305865749457743
Vomiting	hsa00480	Glutathione metabolism	0.00119362243690826	GSTM1, GSTP1, GSTT1, RRM1, OPLAH, RRM2B	0.00305865749457743
Vomiting	hsa05213	Endometrial cancer	0.00146985709176391	BRAF, CASP9, CTNNB1, EGFR, MAPK3, TP53	0.00354494945660707
Vomiting	hsa04142	Lysosome	0.00249969088515981	ACP2, CTNS, GALC, GLA, LIPA, PPT1, SMPD1, SLC17A5, ATP6V0A4	0.00569374034953069
Vomiting	hsa05219	Bladder cancer	0.00319802082724352	BRAF, TYMP, EGFR, MAPK3, TP53	0.00690099231142022
Vomiting	hsa04210	Apoptosis	0.00487339878293069	FAS, FASLG, CASP3, CASP8, CASP9, TNFRSF1A, TP53	0.00943271528150726
Vomiting	hsa05216	Thyroid cancer	0.00487434872136364	BRAF, CTNNB1, MAPK3, TP53	0.00943271528150726
Vomiting	hsa00900	Terpenoid backbone biosynthesis	0.00509670755484672	ACAT1, HMGCS2, MVK	0.00943271528150726
Vomiting	hsa00650	Butanoate metabolism	0.00552024562557322	ACAT1, HADH, HMGCS2, OXCT1	0.00943271528150726
Vomiting	hsa05215	Prostate cancer	0.00552158943307742	BRAF, CASP9, CTNNB1, EGFR, GSTP1, MAPK3, TP53	0.00943271528150726
Vomiting	hsa00982	Drug metabolism - cytochrome P450	0.00812510777944436	CYP2D6, CYP2E1, GSTM1, GSTP1, GSTT1, UGT1A1	0.0133251767582887
Vomiting	hsa00630	Glyoxylate and dicarboxylate metabolism	0.00866850014776814	ACAT1, PCCA, PCCB	0.0136695579253267
Vomiting	hsa05223	Non-small cell lung cancer	0.00943622787899768	BRAF, CASP9, EGFR, MAPK3, TP53	0.0143290867792187
Vomiting	hsa00140	Steroid hormone biosynthesis	0.0109685578657579	COMT, CYP11A1, CYP11B2, HSD3B2, UGT1A1	0.0160611025891455
Vomiting	hsa00062	Fatty acid elongation	0.0147919515942653	HADH, PPT1	0.020912759150513
Vomiting	hsa03420	Nucleotide excision repair	0.0210893700059473	ERCC1, ERCC2, ERCC4, XPC	0.0285757755525384
Vomiting	hsa04950	Maturity onset diabetes of the young	0.0216060741982607	HNF4A, HNF1A, NEUROG3	0.0285757755525384
Vomiting	hsa00052	Galactose metabolism	0.0265337415678152	GALE, GALT, GLA	0.031117891625962
Vomiting	hsa03320	PPAR signaling pathway	0.0266038051587131	ACADL, ACADM, CPT2, HMGCS2, LPL	0.031117891625962
Vomiting	hsa05212	Pancreatic cancer	0.0266038051587131	BRAF, CASP9, EGFR, MAPK3, TP53	0.031117891625962
Vomiting	hsa00980	Metabolism of xenobiotics by cytochrome P450	0.0280806405836892	CYP2E1, GSTM1, GSTP1, GSTT1, UGT1A1	0.031117891625962
Vomiting	hsa05218	Melanoma	0.0280806405836892	BRAF, EGFR, MET, MAPK3, TP53	0.031117891625962
Vomiting	hsa00520	Amino sugar and nucleotide sugar metabolism	0.0280819997600145	GALE, GALT, MPI, PMM2	0.031117891625962
Vomiting	hsa05014	Amyotrophic lateral sclerosis (ALS)	0.038557216889284	CASP3, CASP9, TNFRSF1A, TP53	0.0416012076963327
Vomiting	hsa05142	Chagas disease (American trypanosomiasis)	0.0395889687351435	FAS, FASLG, CASP8, IFNG, MAPK3, TNFRSF1A	0.0416191722600226
Vomiting	hsa00250	Alanine, aspartate and glutamate metabolism	0.0412459735002509	ASL, ASS1, CPS1	0.0422771228377571
Vomiting	hsa04650	Natural killer cell mediated cytotoxicity	0.046127484137065	FAS, FASLG, BRAF, CASP3, IFNA2, IFNG, MAPK3	0.046127484137065
Absence of bactericidal oxidative 'respiratory burst' in phagocytes	hsa04670	Leukocyte transendothelial migration	1.44986231862287e-07	CYBA, CYBB, NCF2, NCF1	4.3202798829003e-07
Absence of bactericidal oxidative 'respiratory burst' in phagocytes	hsa04380	Osteoclast differentiation	2.16013994145015e-07	CYBA, CYBB, NCF2, NCF1	4.3202798829003e-07
Absence of bactericidal oxidative 'respiratory burst' in phagocytes	hsa04145	Phagosome	4.44417204855238e-07	CYBA, CYBB, NCF2, NCF1	5.92556273140317e-07
Absence of bactericidal oxidative 'respiratory burst' in phagocytes	hsa05140	Leishmaniasis	7.02150511397585e-06	CYBA, NCF2, NCF1	7.02150511397585e-06
Deficiency or absence of cytochrome b(-245)	hsa04670	Leukocyte transendothelial migration	0.00038734826488303	CYBA, CYBB	0.000900366941341303
Deficiency or absence of cytochrome b(-245)	hsa04380	Osteoclast differentiation	0.000472018995047866	CYBA, CYBB	0.000900366941341303
Deficiency or absence of cytochrome b(-245)	hsa04145	Phagosome	0.000675275206005977	CYBA, CYBB	0.000900366941341303
Deficiency or absence of cytochrome b(-245)	hsa05140	Leishmaniasis	0.0243872609227854	CYBA	0.0243872609227854
Decreased activity of NADPH oxidase	hsa04670	Leukocyte transendothelial migration	1.44986231862287e-07	CYBA, CYBB, NCF2, NCF1	4.3202798829003e-07
Decreased activity of NADPH oxidase	hsa04380	Osteoclast differentiation	2.16013994145015e-07	CYBA, CYBB, NCF2, NCF1	4.3202798829003e-07
Decreased activity of NADPH oxidase	hsa04145	Phagosome	4.44417204855238e-07	CYBA, CYBB, NCF2, NCF1	5.92556273140317e-07
Decreased activity of NADPH oxidase	hsa05140	Leishmaniasis	7.02150511397585e-06	CYBA, NCF2, NCF1	7.02150511397585e-06
Granulomatous Disease, Chronic, Autosomal Recessive, Cytochrome B-Negative	hsa05140	Leishmaniasis	0.012267848014994	CYBA	0.0260691770318624
Granulomatous Disease, Chronic, Autosomal Recessive, Cytochrome B-Negative	hsa04670	Leukocyte transendothelial migration	0.0197648662463792	CYBA	0.0260691770318624
Granulomatous Disease, Chronic, Autosomal Recessive, Cytochrome B-Negative	hsa04380	Osteoclast differentiation	0.0218095075822118	CYBA	0.0260691770318624
Granulomatous Disease, Chronic, Autosomal Recessive, Cytochrome B-Negative	hsa04145	Phagosome	0.0260691770318624	CYBA	0.0260691770318624
Recurrent Staphylococcus aureus infections	hsa04670	Leukocyte transendothelial migration	7.13856337167477e-07	CYBA, CYBB, NCF2, NCF1	3.18540533872463e-06
Recurrent Staphylococcus aureus infections	hsa04380	Osteoclast differentiation	1.06180177957488e-06	CYBA, CYBB, NCF2, NCF1	3.18540533872463e-06
Recurrent Staphylococcus aureus infections	hsa04145	Phagosome	2.1769244464256e-06	CYBA, CYBB, NCF2, NCF1	4.35384889285119e-06
Recurrent Staphylococcus aureus infections	hsa05140	Leishmaniasis	1.73989738752808e-05	CYBA, NCF2, NCF1	2.60984608129213e-05
Recurrent Staphylococcus aureus infections	hsa04062	Chemokine signaling pathway	0.00967510472952155	STAT3, NCF1	0.0116101256754259
Recurrent Staphylococcus aureus infections	hsa05221	Acute myeloid leukemia	0.0476420321933158	STAT3	0.0476420321933158
Autosomal Recessive Chronic Granulomatous Disease	hsa04670	Leukocyte transendothelial migration	7.13856337167477e-07	CYBA, CYBB, NCF2, NCF1	3.18540533872463e-06
Autosomal Recessive Chronic Granulomatous Disease	hsa04380	Osteoclast differentiation	1.06180177957488e-06	CYBA, CYBB, NCF2, NCF1	3.18540533872463e-06
Autosomal Recessive Chronic Granulomatous Disease	hsa04145	Phagosome	2.1769244464256e-06	CYBA, CYBB, NCF2, NCF1	4.35384889285119e-06
Autosomal Recessive Chronic Granulomatous Disease	hsa05140	Leishmaniasis	1.73989738752808e-05	CYBA, NCF2, NCF1	2.60984608129213e-05
Autosomal Recessive Chronic Granulomatous Disease	hsa00030	Pentose phosphate pathway	0.0227992448836734	G6PD	0.027359093860408
Autosomal Recessive Chronic Granulomatous Disease	hsa00480	Glutathione metabolism	0.0418910946663333	G6PD	0.0418910946663333
Recurrent Klebsiella infections	hsa04670	Leukocyte transendothelial migration	1.44986231862287e-07	CYBA, CYBB, NCF2, NCF1	4.3202798829003e-07
Recurrent Klebsiella infections	hsa04380	Osteoclast differentiation	2.16013994145015e-07	CYBA, CYBB, NCF2, NCF1	4.3202798829003e-07
Recurrent Klebsiella infections	hsa04145	Phagosome	4.44417204855238e-07	CYBA, CYBB, NCF2, NCF1	5.92556273140317e-07
Recurrent Klebsiella infections	hsa05140	Leishmaniasis	7.02150511397585e-06	CYBA, NCF2, NCF1	7.02150511397585e-06
Recurrent Aspergillus infections	hsa04670	Leukocyte transendothelial migration	1.44986231862287e-07	CYBA, CYBB, NCF2, NCF1	4.3202798829003e-07
Recurrent Aspergillus infections	hsa04380	Osteoclast differentiation	2.16013994145015e-07	CYBA, CYBB, NCF2, NCF1	4.3202798829003e-07
Recurrent Aspergillus infections	hsa04145	Phagosome	4.44417204855238e-07	CYBA, CYBB, NCF2, NCF1	5.92556273140317e-07
Recurrent Aspergillus infections	hsa05140	Leishmaniasis	7.02150511397585e-06	CYBA, NCF2, NCF1	7.02150511397585e-06
Recurrent Burkholderia cepacia infections	hsa04670	Leukocyte transendothelial migration	1.44986231862287e-07	CYBA, CYBB, NCF2, NCF1	4.3202798829003e-07
Recurrent Burkholderia cepacia infections	hsa04380	Osteoclast differentiation	2.16013994145015e-07	CYBA, CYBB, NCF2, NCF1	4.3202798829003e-07
Recurrent Burkholderia cepacia infections	hsa04145	Phagosome	4.44417204855238e-07	CYBA, CYBB, NCF2, NCF1	5.92556273140317e-07
Recurrent Burkholderia cepacia infections	hsa05140	Leishmaniasis	7.02150511397585e-06	CYBA, NCF2, NCF1	7.02150511397585e-06
Recurrent Serratia marcescens infections	hsa04670	Leukocyte transendothelial migration	1.44986231862287e-07	CYBA, CYBB, NCF2, NCF1	4.3202798829003e-07
Recurrent Serratia marcescens infections	hsa04380	Osteoclast differentiation	2.16013994145015e-07	CYBA, CYBB, NCF2, NCF1	4.3202798829003e-07
Recurrent Serratia marcescens infections	hsa04145	Phagosome	4.44417204855238e-07	CYBA, CYBB, NCF2, NCF1	5.92556273140317e-07
Recurrent Serratia marcescens infections	hsa05140	Leishmaniasis	7.02150511397585e-06	CYBA, NCF2, NCF1	7.02150511397585e-06
Long chain acyl-CoA dehydrogenase deficiency	hsa00071	Fatty acid degradation	0.00732663145339929	ACADL	0.011927074459022
Long chain acyl-CoA dehydrogenase deficiency	hsa03320	PPAR signaling pathway	0.011927074459022	ACADL	0.011927074459022
End stage COPD	hsa05140	Leishmaniasis	0.012267848014994	CYBA	0.0260691770318624
End stage COPD	hsa04670	Leukocyte transendothelial migration	0.0197648662463792	CYBA	0.0260691770318624
End stage COPD	hsa04380	Osteoclast differentiation	0.0218095075822118	CYBA	0.0260691770318624
End stage COPD	hsa04145	Phagosome	0.0260691770318624	CYBA	0.0260691770318624
Negative nitroblue tetrazolium reduction test	hsa04670	Leukocyte transendothelial migration	1.44986231862287e-07	CYBA, CYBB, NCF2, NCF1	4.3202798829003e-07
Negative nitroblue tetrazolium reduction test	hsa04380	Osteoclast differentiation	2.16013994145015e-07	CYBA, CYBB, NCF2, NCF1	4.3202798829003e-07
Negative nitroblue tetrazolium reduction test	hsa04145	Phagosome	4.44417204855238e-07	CYBA, CYBB, NCF2, NCF1	5.92556273140317e-07
Negative nitroblue tetrazolium reduction test	hsa05140	Leishmaniasis	7.02150511397585e-06	CYBA, NCF2, NCF1	7.02150511397585e-06
Chronic granulomatous disease, type II	hsa04670	Leukocyte transendothelial migration	0.0197648662463792	CYBB	0.0260691770318624
Chronic granulomatous disease, type II	hsa04380	Osteoclast differentiation	0.0218095075822118	CYBB	0.0260691770318624
Chronic granulomatous disease, type II	hsa04145	Phagosome	0.0260691770318624	CYBB	0.0260691770318624
Dystrophic cardiomyopathy	hsa05416	Viral myocarditis	0.0237139021324828	DMD	0.0431469961693753
Dystrophic cardiomyopathy	hsa05412	Arrhythmogenic right ventricular cardiomyopathy (ARVC)	0.0250603874202756	DMD	0.0431469961693753
Dystrophic cardiomyopathy	hsa05410	Hypertrophic cardiomyopathy (HCM)	0.0280865820354262	DMD	0.0431469961693753
Dystrophic cardiomyopathy	hsa05414	Dilated cardiomyopathy	0.0304370368589456	DMD	0.0431469961693753
Dystrophic cardiomyopathy	hsa04670	Leukocyte transendothelial migration	0.0391423842278754	CYBB	0.0431469961693753
Dystrophic cardiomyopathy	hsa04380	Osteoclast differentiation	0.0431469961693753	CYBB	0.0431469961693753
Anterior Cerebral Circulation Infarction	hsa04610	Complement and coagulation cascades	0.0348628996707688	PLAT	0.0358611451900989
[truncated: 204,414+ more rows]
