# Supplementary material for: Pathway Maps of Orphan and Complex Diseases Using an Integrative Computational Approach
Source: Biomed Res Int. 2020 Nov 27;2020:4280467. doi: 10.1155/2020/4280467 (PMC7744584; doi:10.1155/2020/4280467)
Supplement: Supplementary 4 — Supplementary Table 4: Orphan Diseases and Complex Diseases Common pathways. [file 4280467.f4.xlsx]

## Sheet: Sheet1
Supplementary File4 : Orphan Diseases and Complex Diseases Common pathways
Orphan Disease	Complex Disease	Pathway
Microphthalmia with linear skin defects syndrome	Vitritis	Parkinson's disease
Microphthalmia with linear skin defects syndrome	Sclerocornea	Parkinson's disease
Distal 22q11.2 microdeletion syndrome	Adenocarcinoma	Chronic myeloid leukemia
Distal 22q11.2 microdeletion syndrome	Mental Depression	Pathways in cancer
Distal 22q11.2 microdeletion syndrome	Adenoid Cystic Carcinoma	Chronic myeloid leukemia
Distal 22q11.2 microdeletion syndrome	Liver and Intrahepatic Biliary Tract Carcinoma	Chronic myeloid leukemia
Distal 22q11.2 microdeletion syndrome	Malignant neoplasm of mouth	Chronic myeloid leukemia
Distal 22q11.2 microdeletion syndrome	Cholangiocarcinoma	Chronic myeloid leukemia
Distal 22q11.2 microdeletion syndrome	Lip and Oral Cavity Carcinoma	Chronic myeloid leukemia
Distal 22q11.2 microdeletion syndrome	Pancreatic carcinoma	Chronic myeloid leukemia
Distal 22q11.2 microdeletion syndrome	Anoxia	Chronic myeloid leukemia
Distal 22q11.2 microdeletion syndrome	Septicemia	Chronic myeloid leukemia
Distal 22q11.2 microdeletion syndrome	Sepsis	Chronic myeloid leukemia
Distal 22q11.2 microdeletion syndrome	Conventional (Clear Cell) Renal Cell Carcinoma	Chronic myeloid leukemia
Distal 22q11.2 microdeletion syndrome	Depressive disorder	Chronic myeloid leukemia
Distal 22q11.2 microdeletion syndrome	Adenocarcinoma of pancreas	Chronic myeloid leukemia
Distal 22q11.2 microdeletion syndrome	Brain Ischemia	Chronic myeloid leukemia
Distal 22q11.2 microdeletion syndrome	Hyperplastic Polyp	Chronic myeloid leukemia
Distal 22q11.2 microdeletion syndrome	Adenocarcinoma of colon	Chronic myeloid leukemia
Distal 22q11.2 microdeletion syndrome	Acute myelomonocytic leukemia	Chronic myeloid leukemia
Distal 22q11.2 microdeletion syndrome	Myasthenia Gravis	Chronic myeloid leukemia
Distal 22q11.2 microdeletion syndrome	Malignant neoplasm of pancreas	Chronic myeloid leukemia
Distal 22q11.2 microdeletion syndrome	Teratocarcinoma	Chronic myeloid leukemia
Distal 22q11.2 microdeletion syndrome	Malignant neoplasm of esophagus	Chronic myeloid leukemia
Distal 22q11.2 microdeletion syndrome	Carcinogenesis	Chronic myeloid leukemia
Distal 22q11.2 microdeletion syndrome	Leukemogenesis	Chronic myeloid leukemia
Distal 22q11.2 microdeletion syndrome	Carcinoma of lung	Chronic myeloid leukemia
Distal 22q11.2 microdeletion syndrome	Stomach Carcinoma	Chronic myeloid leukemia
Distal 22q11.2 microdeletion syndrome	Inflammatory disorder	Chronic myeloid leukemia
Distal 22q11.2 microdeletion syndrome	THANATOPHORIC DYSPLASIA, TYPE I (disorder)	Chronic myeloid leukemia
Distal 22q11.2 microdeletion syndrome	Neoplasm Invasiveness	Chronic myeloid leukemia
Distal 22q11.2 microdeletion syndrome	Central neuroblastoma	Chronic myeloid leukemia
Distal 22q11.2 microdeletion syndrome	Iron deficiency	Chronic myeloid leukemia
Distal 22q11.2 microdeletion syndrome	Arthritis	Chronic myeloid leukemia
Distal 22q11.2 microdeletion syndrome	Lupus Vulgaris	Chronic myeloid leukemia
Distal 22q11.2 microdeletion syndrome	Lupus Erythematosus, Discoid	Chronic myeloid leukemia
Distal 22q11.2 microdeletion syndrome	Lupus Erythematosus	Chronic myeloid leukemia
Distal 22q11.2 microdeletion syndrome	Squamous cell carcinoma of the head and neck	Chronic myeloid leukemia
Distal 22q11.2 microdeletion syndrome	Developmental Disabilities	Chronic myeloid leukemia
Distal 22q11.2 microdeletion syndrome	Colitis	Chronic myeloid leukemia
Distal 22q11.2 microdeletion syndrome	Dwarfism	Chronic myeloid leukemia
Distal 22q11.2 microdeletion syndrome	Fibroid Tumor	Chronic myeloid leukemia
Distal 22q11.2 microdeletion syndrome	Noonan Syndrome	Chronic myeloid leukemia
Distal 22q11.2 microdeletion syndrome	Turner Syndrome, Male	Chronic myeloid leukemia
Distal 22q11.2 microdeletion syndrome	Polycystic Kidney, Autosomal Dominant	Chronic myeloid leukemia
Distal 22q11.2 microdeletion syndrome	Diabetes Mellitus	Chronic myeloid leukemia
Distal 22q11.2 microdeletion syndrome	Primary malignant neoplasm of lung	Chronic myeloid leukemia
Distal 22q11.2 microdeletion syndrome	Metastatic Neoplasm	Chronic myeloid leukemia
Distal 22q11.2 microdeletion syndrome	Gaucher Disease	Shigellosis
Distal 22q11.2 microdeletion syndrome	Hairy Cell Leukemia	Chronic myeloid leukemia
Distal 22q11.2 microdeletion syndrome	Osteochondrodysplasias	Chronic myeloid leukemia
Distal 22q11.2 microdeletion syndrome	Mammary Neoplasms	Chronic myeloid leukemia
Distal 22q11.2 microdeletion syndrome	Skeletal dysplasia	Pathways in cancer
Distal 22q11.2 microdeletion syndrome	Colorectal Cancer	Chronic myeloid leukemia
Distal 22q11.2 microdeletion syndrome	Juvenile-Onset Still Disease	Pathways in cancer
Distal 22q11.2 microdeletion syndrome	Tumor Initiation	Chronic myeloid leukemia
Distal 22q11.2 microdeletion syndrome	Hyperalgesia, Thermal	Pathways in cancer
Distal 22q11.2 microdeletion syndrome	androgen independent prostate cancer	Chronic myeloid leukemia
Distal 22q11.2 microdeletion syndrome	Juvenile psoriatic arthritis	Pathways in cancer
Distal 22q11.2 microdeletion syndrome	Severe Acute Respiratory Syndrome	Chronic myeloid leukemia
Distal 22q11.2 microdeletion syndrome	Radiation Injuries, Experimental	Chronic myeloid leukemia
Distal 22q11.2 microdeletion syndrome	Allergic disposition	Chronic myeloid leukemia
Distal 22q11.2 microdeletion syndrome	Childhood Neuroblastoma	Chronic myeloid leukemia
Distal 22q11.2 microdeletion syndrome	Acquired Immunodeficiency Syndrome	Chronic myeloid leukemia
Distal 22q11.2 microdeletion syndrome	Cholestasis, Extrahepatic	Chronic myeloid leukemia
Distal 22q11.2 microdeletion syndrome	Dupuytren Contracture	Chronic myeloid leukemia
Distal 22q11.2 microdeletion syndrome	Brain Neoplasms	Chronic myeloid leukemia
Distal 22q11.2 microdeletion syndrome	Idiopathic pulmonary arterial hypertension	Chronic myeloid leukemia
Distal 22q11.2 microdeletion syndrome	Malignant neoplasm of thyroid	Chronic myeloid leukemia
Distal 22q11.2 microdeletion syndrome	Dupuytren's Disease	Chronic myeloid leukemia
Distal 22q11.2 microdeletion syndrome	Ataxia Telangiectasia	Chronic myeloid leukemia
Distal 22q11.2 microdeletion syndrome	Non-Small Cell Lung Carcinoma	Chronic myeloid leukemia
Distal 22q11.2 microdeletion syndrome	Fetal Alcohol Syndrome	Chronic myeloid leukemia
Distal 22q11.2 microdeletion syndrome	Renal Cell Carcinoma	Chronic myeloid leukemia
Distal 22q11.2 microdeletion syndrome	Malignant tumor of cervix	Chronic myeloid leukemia
Distal 22q11.2 microdeletion syndrome	Spinal Muscular Atrophy	Chronic myeloid leukemia
Distal 22q11.2 microdeletion syndrome	Pituitary Diseases	Chronic myeloid leukemia
Distal 22q11.2 microdeletion syndrome	Streptococcal pneumonia	Chronic myeloid leukemia
Distal 22q11.2 microdeletion syndrome	Crohn Disease	Chronic myeloid leukemia
Distal 22q11.2 microdeletion syndrome	Secondary malignant neoplasm of liver	Chronic myeloid leukemia
Distal 22q11.2 microdeletion syndrome	Hepatitis C, Chronic	Chronic myeloid leukemia
Distal 22q11.2 microdeletion syndrome	Endometrial adenocarcinoma	Chronic myeloid leukemia
Distal 22q11.2 microdeletion syndrome	Pointed chin	Chronic myeloid leukemia
Distal 22q11.2 microdeletion syndrome	Diabetic Nephropathy	Chronic myeloid leukemia
Distal 22q11.2 microdeletion syndrome	Highly arched eyebrow	Chronic myeloid leukemia
Distal 22q11.2 microdeletion syndrome	Bowed and upward slanting eyebrows	Chronic myeloid leukemia
Distal 22q11.2 microdeletion syndrome	Endometriosis	Chronic myeloid leukemia
Distal 22q11.2 microdeletion syndrome	Esophageal Neoplasms	Chronic myeloid leukemia
Distal 22q11.2 microdeletion syndrome	Hereditary Diffuse Gastric Cancer	Chronic myeloid leukemia
Distal 22q11.2 microdeletion syndrome	Osteoporosis	Chronic myeloid leukemia
Distal 22q11.2 microdeletion syndrome	Glioma	Chronic myeloid leukemia
Distal 22q11.2 microdeletion syndrome	Fibrosis	Chronic myeloid leukemia
Distal 22q11.2 microdeletion syndrome	Head and Neck Neoplasms	Chronic myeloid leukemia
Distal 22q11.2 microdeletion syndrome	IGA Glomerulonephritis	Chronic myeloid leukemia
Distal 22q11.2 microdeletion syndrome	AIDS-Associated Nephropathy	Chronic myeloid leukemia
Distal 22q11.2 microdeletion syndrome	Stage IV Ovarian Carcinoma	Chronic myeloid leukemia
Distal 22q11.2 microdeletion syndrome	Secondary malignant neoplasm of lymph node	Chronic myeloid leukemia
Distal 22q11.2 microdeletion syndrome	HIV Infections	Chronic myeloid leukemia
Distal 22q11.2 microdeletion syndrome	Invasive Skin Melanoma	Chronic myeloid leukemia
Distal 22q11.2 microdeletion syndrome	Huntington Disease	Chronic myeloid leukemia
Distal 22q11.2 microdeletion syndrome	Inflammatory Bowel Diseases	Chronic myeloid leukemia
Distal 22q11.2 microdeletion syndrome	Pilocytic Astrocytoma	Chronic myeloid leukemia
Distal 22q11.2 microdeletion syndrome	Malignant Glioma	Chronic myeloid leukemia
Distal 22q11.2 microdeletion syndrome	Myeloid Leukemia	Chronic myeloid leukemia
Distal 22q11.2 microdeletion syndrome	Curvature of little finger	Chronic myeloid leukemia
Distal 22q11.2 microdeletion syndrome	Pituitary Neoplasms	Chronic myeloid leukemia
Distal 22q11.2 microdeletion syndrome	Chondrosarcoma	Chronic myeloid leukemia
Distal 22q11.2 microdeletion syndrome	Dermatologic disorders	Chronic myeloid leukemia
Distal 22q11.2 microdeletion syndrome	Osteopenia	Chronic myeloid leukemia
Distal 22q11.2 microdeletion syndrome	Ovarian Carcinoma	Chronic myeloid leukemia
Distal 22q11.2 microdeletion syndrome	Liver neoplasms	Chronic myeloid leukemia
Distal 22q11.2 microdeletion syndrome	Pancreatic Neoplasm	Chronic myeloid leukemia
Distal 22q11.2 microdeletion syndrome	Parkinson Disease	Chronic myeloid leukemia
Distal 22q11.2 microdeletion syndrome	Systemic Scleroderma	Chronic myeloid leukemia
Distal 22q11.2 microdeletion syndrome	Stomach Neoplasms	Chronic myeloid leukemia
Distal 22q11.2 microdeletion syndrome	Pleural Effusion, Malignant	Chronic myeloid leukemia
Distal 22q11.2 microdeletion syndrome	Tuberculosis	Chronic myeloid leukemia
Distal 22q11.2 microdeletion syndrome	Tuberculosis, Pulmonary	Chronic myeloid leukemia
Distal 22q11.2 microdeletion syndrome	Anemia, Diamond-Blackfan	Chronic myeloid leukemia
Distal 22q11.2 microdeletion syndrome	Virus Diseases	Chronic myeloid leukemia
Distal 22q11.2 microdeletion syndrome	Glioblastoma	Chronic myeloid leukemia
Distal 22q11.2 microdeletion syndrome	B-Cell Lymphomas	Chronic myeloid leukemia
Distal 22q11.2 microdeletion syndrome	XERODERMA PIGMENTOSUM, COMPLEMENTATION GROUP C	Chronic myeloid leukemia
Distal 22q11.2 microdeletion syndrome	Epstein-Barr Virus Infections	Chronic myeloid leukemia
Distal 22q11.2 microdeletion syndrome	Secondary malignant neoplasm of lung	Chronic myeloid leukemia
Distal 22q11.2 microdeletion syndrome	Malignant neoplasm of kidney	Chronic myeloid leukemia
Distal 22q11.2 microdeletion syndrome	Renal carcinoma	Chronic myeloid leukemia
Distal 22q11.2 microdeletion syndrome	Severe Sepsis	Pathways in cancer
Distal 22q11.2 microdeletion syndrome	Metastatic melanoma	Chronic myeloid leukemia
Distal 22q11.2 microdeletion syndrome	Adenocarcinoma of lung (disorder)	Chronic myeloid leukemia
Distal 22q11.2 microdeletion syndrome	Mental disorders	ErbB signaling pathway
Distal 22q11.2 microdeletion syndrome	Abnormal behavior	Neurotrophin signaling pathway
Distal 22q11.2 microdeletion syndrome	Esophageal carcinoma	Chronic myeloid leukemia
Distal 22q11.2 microdeletion syndrome	Drug Dependence	ErbB signaling pathway
Distal 22q11.2 microdeletion syndrome	Substance Withdrawal Syndrome	Pathways in cancer
Distal 22q11.2 microdeletion syndrome	Drug Withdrawal Symptoms	Chemokine signaling pathway
Distal 22q11.2 microdeletion syndrome	Withdrawal Symptoms	Neurotrophin signaling pathway
Distal 22q11.2 microdeletion syndrome	Cardiomyopathies, Primary	Chronic myeloid leukemia
Distal 22q11.2 microdeletion syndrome	Myocardial Diseases, Secondary	Chronic myeloid leukemia
Distal 22q11.2 microdeletion syndrome	Lung Neoplasms	Chronic myeloid leukemia
Distal 22q11.2 microdeletion syndrome	Malignant neoplasm of gallbladder	Chronic myeloid leukemia
Distal 22q11.2 microdeletion syndrome	Neurofibromatosis 1	Chronic myeloid leukemia
Distal 22q11.2 microdeletion syndrome	Dermatitis, Allergic Contact	Chemokine signaling pathway
Distal 22q11.2 microdeletion syndrome	Tumor Progression	Chronic myeloid leukemia
Distal 22q11.2 microdeletion syndrome	HER2 gene amplification	Chronic myeloid leukemia
Distal 22q11.2 microdeletion syndrome	Head Neoplasms	Chronic myeloid leukemia
Distal 22q11.2 microdeletion syndrome	Neck Neoplasms	Chronic myeloid leukemia
Distal 22q11.2 microdeletion syndrome	Erythema	Pathways in cancer
Distal 22q11.2 microdeletion syndrome	Multiple Sclerosis	Chronic myeloid leukemia
Distal 22q11.2 microdeletion syndrome	Cancer of Neck	Chronic myeloid leukemia
Distal 22q11.2 microdeletion syndrome	Gallbladder Carcinoma	Chronic myeloid leukemia
Distal 22q11.2 microdeletion syndrome	Cancer of Head	Chronic myeloid leukemia
Distal 22q11.2 microdeletion syndrome	Upper Aerodigestive Tract Neoplasms	Chronic myeloid leukemia
Distal 22q11.2 microdeletion syndrome	Medullary carcinoma of thyroid	Chronic myeloid leukemia
Distal 22q11.2 microdeletion syndrome	Malignant neoplasm of endometrium	Chronic myeloid leukemia
Distal 22q11.2 microdeletion syndrome	Endometrial Carcinoma	Chronic myeloid leukemia
Distal 22q11.2 microdeletion syndrome	Uterine Corpus Cancer	Chronic myeloid leukemia
Distal 22q11.2 microdeletion syndrome	Encephalitis, St. Louis	Pathways in cancer
Distal 22q11.2 microdeletion syndrome	Malignant Head and Neck Neoplasm	Chronic myeloid leukemia
Distal 22q11.2 microdeletion syndrome	Glomerulonephritis	Pathways in cancer
Distal 22q11.2 microdeletion syndrome	Hyperalgesia	Chronic myeloid leukemia
Distal 22q11.2 microdeletion syndrome	Pyemia	Chronic myeloid leukemia
Distal 22q11.2 microdeletion syndrome	Squamous cell carcinoma of esophagus	Chronic myeloid leukemia
Distal 22q11.2 microdeletion syndrome	Renal fibrosis	Chronic myeloid leukemia
Distal 22q11.2 microdeletion syndrome	Transitional cell carcinoma of bladder	Chronic myeloid leukemia
Distal 22q11.2 microdeletion syndrome	Carcinoma, Lewis Lung	Chronic myeloid leukemia
Distal 22q11.2 microdeletion syndrome	Neoplasm Metastasis	Chronic myeloid leukemia
Distal 22q11.2 microdeletion syndrome	Solid Neoplasm	Chronic myeloid leukemia
Distal 22q11.2 microdeletion syndrome	Allodynia	Chronic myeloid leukemia
Distal 22q11.2 microdeletion syndrome	Central Serous Chorioretinopathy	Chronic myeloid leukemia
Distal 22q11.2 microdeletion syndrome	Hyperalgesia, Primary	Chronic myeloid leukemia
Distal 22q11.2 microdeletion syndrome	Hyperalgesia, Secondary	Chronic myeloid leukemia
Distal 22q11.2 microdeletion syndrome	Tactile Allodynia	Chronic myeloid leukemia
Distal 22q11.2 microdeletion syndrome	Angiogenic Switch	Chronic myeloid leukemia
Distal 22q11.2 microdeletion syndrome	tumor vasculature	Chronic myeloid leukemia
Distal 22q11.2 microdeletion syndrome	Mechanical Allodynia	Pathways in cancer
Distal 22q11.2 microdeletion syndrome	Nerve Degeneration	Pathways in cancer
Distal 22q11.2 microdeletion syndrome	Cervix carcinoma	Chronic myeloid leukemia
Distal 22q11.2 microdeletion syndrome	Malignant neoplasm of liver	Chronic myeloid leukemia
Distal 22q11.2 microdeletion syndrome	Malignant mesothelioma	Chronic myeloid leukemia
Distal 22q11.2 microdeletion syndrome	Anthrax disease	Chronic myeloid leukemia
Distal 22q11.2 microdeletion syndrome	Melanocytic nevus	Chronic myeloid leukemia
Distal 22q11.2 microdeletion syndrome	Trigeminal Neuralgia	Chronic myeloid leukemia
Distal 22q11.2 microdeletion syndrome	Central Nervous System Neoplasms	Chronic myeloid leukemia
Distal 22q11.2 microdeletion syndrome	Epithelial ovarian cancer	Chronic myeloid leukemia
Distal 22q11.2 microdeletion syndrome	Ewings sarcoma	Chronic myeloid leukemia
Distal 22q11.2 microdeletion syndrome	Lymphangioleiomyomatosis	Pathways in cancer
Distal 22q11.2 microdeletion syndrome	Ischemia of kidney	Chronic myeloid leukemia
Distal 22q11.2 microdeletion syndrome	Classical Hodgkin's Lymphoma	Chronic myeloid leukemia
Distal 22q11.2 microdeletion syndrome	Rash and Dermatitis Adverse Event Associated with Chemoradiation	Chronic myeloid leukemia
Distal 22q11.2 microdeletion syndrome	Experimental Organism Basal Cell Carcinoma	Chronic myeloid leukemia
Distal 22q11.2 microdeletion syndrome	Malignant Pleural Mesothelioma	Chronic myeloid leukemia
Distal 22q11.2 microdeletion syndrome	Malignant neoplasm of skin	Chronic myeloid leukemia
Distal 22q11.2 microdeletion syndrome	Cocaine Abuse	Chronic myeloid leukemia
Distal 22q11.2 microdeletion syndrome	Kaposi Sarcoma	Chronic myeloid leukemia
Distal 22q11.2 microdeletion syndrome	Cardiomyopathies	Chronic myeloid leukemia
Distal 22q11.2 microdeletion syndrome	Cocaine Dependence	ErbB signaling pathway
Distal 22q11.2 microdeletion syndrome	Malignant neoplasm of ovary	Chronic myeloid leukemia
Distal 22q11.2 microdeletion syndrome	Obesity	Chronic myeloid leukemia
Distal 22q11.2 microdeletion syndrome	Periodontitis	Chronic myeloid leukemia
Distal 22q11.2 microdeletion syndrome	Depressive Symptoms	Chronic myeloid leukemia
Distal 22q11.2 microdeletion syndrome	Hepatocarcinogenesis	Chronic myeloid leukemia
Distal 22q11.2 microdeletion syndrome	Smooth philtrum	Chronic myeloid leukemia
Distal 22q11.2 microdeletion syndrome	Coronary Artery Disease	Chronic myeloid leukemia
Distal 22q11.2 microdeletion syndrome	Alveolar rhabdomyosarcoma	Chronic myeloid leukemia
Distal 22q11.2 microdeletion syndrome	Precursor Cell Lymphoblastic Leukemia Lymphoma	Chronic myeloid leukemia
Distal 22q11.2 microdeletion syndrome	Hepatoma, Morris	Chronic myeloid leukemia
Distal 22q11.2 microdeletion syndrome	Hepatoma, Novikoff	Chronic myeloid leukemia
Distal 22q11.2 microdeletion syndrome	Liver Neoplasms, Experimental	Chronic myeloid leukemia
Distal 22q11.2 microdeletion syndrome	Experimental Hepatoma	Chronic myeloid leukemia
Distal 22q11.2 microdeletion syndrome	Ganglioglioma	Chronic myeloid leukemia
Distal 22q11.2 microdeletion syndrome	cervical cancer	Chronic myeloid leukemia
Distal 22q11.2 microdeletion syndrome	Achondroplasia	Chronic myeloid leukemia
Distal 22q11.2 microdeletion syndrome	Arthropathy	Chronic myeloid leukemia
Distal 22q11.2 microdeletion syndrome	Anaplasia	Chronic myeloid leukemia
Distal 22q11.2 microdeletion syndrome	Mucinous Adenocarcinoma	Chronic myeloid leukemia
Distal 22q11.2 microdeletion syndrome	Encephalomyelitis	Chronic myeloid leukemia
Distal 22q11.2 microdeletion syndrome	Hypertrophy	Chronic myeloid leukemia
Distal 22q11.2 microdeletion syndrome	Polycystic Kidney Diseases	Chronic myeloid leukemia
Distal 22q11.2 microdeletion syndrome	Prostatic Neoplasms	Chronic myeloid leukemia
Distal 22q11.2 microdeletion syndrome	Embryonal Rhabdomyosarcoma	Chronic myeloid leukemia
Distal 22q11.2 microdeletion syndrome	Congestive heart failure	Chronic myeloid leukemia
Distal 22q11.2 microdeletion syndrome	Hepatitis C	Chronic myeloid leukemia
Distal 22q11.2 microdeletion syndrome	Squamous cell carcinoma of skin	Chronic myeloid leukemia
Distal 22q11.2 microdeletion syndrome	Sjogren's Syndrome	Chronic myeloid leukemia
Distal 22q11.2 microdeletion syndrome	Enophthalmos	Chronic myeloid leukemia
Distal 22q11.2 microdeletion syndrome	Sunken eyes	Chronic myeloid leukemia
Distal 22q11.2 microdeletion syndrome	Malaria	Chronic myeloid leukemia
Distal 22q11.2 microdeletion syndrome	Intestinal Neoplasms	Chronic myeloid leukemia
Distal 22q11.2 microdeletion syndrome	Acute myocardial infarction	Chronic myeloid leukemia
Distal 22q11.2 microdeletion syndrome	Amyloidosis	Chronic myeloid leukemia
Distal 22q11.2 microdeletion syndrome	Peritoneal Fibrosis	Chronic myeloid leukemia
Distal 22q11.2 microdeletion syndrome	ovarian neoplasm	Chronic myeloid leukemia
Distal 22q11.2 microdeletion syndrome	Tauopathies	Pathways in cancer
Distal 22q11.2 microdeletion syndrome	Severe Dengue	Pathways in cancer
Distal 22q11.2 microdeletion syndrome	PACHYONYCHIA CONGENITA 3	Chronic myeloid leukemia
Distal 22q11.2 microdeletion syndrome	Rhabdomyosarcoma	Chronic myeloid leukemia
Distal 22q11.2 microdeletion syndrome	MYELODYSPLASTIC SYNDROME	Chronic myeloid leukemia
Distal 22q11.2 microdeletion syndrome	Tumor Promotion	Chronic myeloid leukemia
Distal 22q11.2 microdeletion syndrome	Autoimmune arthritis	Pathways in cancer
Distal 22q11.2 microdeletion syndrome	Retinoblastoma	Chronic myeloid leukemia
Distal 22q11.2 microdeletion syndrome	Trigeminal Neuralgia, Idiopathic	Chronic myeloid leukemia
Distal 22q11.2 microdeletion syndrome	Secondary Trigeminal Neuralgia	Chronic myeloid leukemia
Distal 22q11.2 microdeletion syndrome	Malignant neoplasm of large intestine	Chronic myeloid leukemia
Distal 22q11.2 microdeletion syndrome	Bronchioloalveolar Adenocarcinoma	Chronic myeloid leukemia
Distal 22q11.2 microdeletion syndrome	Hemangiosarcoma	Chronic myeloid leukemia
Distal 22q11.2 microdeletion syndrome	Secondary malignant neoplasm of bone	Chronic myeloid leukemia
Distal 22q11.2 microdeletion syndrome	Multiple Endocrine Neoplasia Type 2a	Chronic myeloid leukemia
Distal 22q11.2 microdeletion syndrome	Paget Disease Extramammary	Chronic myeloid leukemia
Distal 22q11.2 microdeletion syndrome	Papilloma	Chronic myeloid leukemia
Distal 22q11.2 microdeletion syndrome	Pseudomyxoma Peritonei	Chronic myeloid leukemia
Distal 22q11.2 microdeletion syndrome	synovial sarcoma	Chronic myeloid leukemia
Distal 22q11.2 microdeletion syndrome	LEOPARD Syndrome	Chronic myeloid leukemia
Distal 22q11.2 microdeletion syndrome	Major Depressive Disorder	Chronic myeloid leukemia
Distal 22q11.2 microdeletion syndrome	Primary malignant neoplasm	Chronic myeloid leukemia
Distal 22q11.2 microdeletion syndrome	Anaplastic thyroid carcinoma	Chronic myeloid leukemia
Distal 22q11.2 microdeletion syndrome	Infant, Small for Gestational Age	Chronic myeloid leukemia
Distal 22q11.2 microdeletion syndrome	Leukocyte adhesion deficiency type 1	Chronic myeloid leukemia
Distal 22q11.2 microdeletion syndrome	Costello syndrome (disorder)	Chronic myeloid leukemia
Distal 22q11.2 microdeletion syndrome	Breast adenocarcinoma	Chronic myeloid leukemia
Distal 22q11.2 microdeletion syndrome	Colorectal cancer metastatic	Chronic myeloid leukemia
Distal 22q11.2 microdeletion syndrome	Mesenchymal Cell Neoplasm	Chronic myeloid leukemia
Distal 22q11.2 microdeletion syndrome	Peripheral Neuropathy	Pathways in cancer
Distal 22q11.2 microdeletion syndrome	ECTRODACTYLY, ECTODERMAL DYSPLASIA, AND CLEFT LIP/PALATE SYNDROME 1	Chronic myeloid leukemia
Distal 22q11.2 microdeletion syndrome	Ataxia, Spinocerebellar	Pathways in cancer
Distal 22q11.2 microdeletion syndrome	Intrauterine retardation	Chronic myeloid leukemia
Distal 22q11.2 microdeletion syndrome	Mucoepidermoid Carcinoma	Chronic myeloid leukemia
Distal 22q11.2 microdeletion syndrome	Cognitive delay	Chronic myeloid leukemia
Distal 22q11.2 microdeletion syndrome	Intellectual Disability	Chronic myeloid leukemia
Distal 22q11.2 microdeletion syndrome	Mental and motor retardation	Chronic myeloid leukemia
Distal 22q11.2 microdeletion syndrome	Fanconi Anemia	Chronic myeloid leukemia
Distal 22q11.2 microdeletion syndrome	Herpes Simplex Infections	Chronic myeloid leukemia
Distal 22q11.2 microdeletion syndrome	Lyme Disease	Chronic myeloid leukemia
Distal 22q11.2 microdeletion syndrome	Scleroderma	Chronic myeloid leukemia
Distal 22q11.2 microdeletion syndrome	Malignant neoplasm of lung	Chronic myeloid leukemia
Distal 22q11.2 microdeletion syndrome	FANCONI ANEMIA, COMPLEMENTATION GROUP A (disorder)	Chronic myeloid leukemia
Distal 22q11.2 microdeletion syndrome	Pterygium	Chronic myeloid leukemia
Distal 22q11.2 microdeletion syndrome	Hypertrophic disorder of skin, unspecified	Chronic myeloid leukemia
Distal 22q11.2 microdeletion syndrome	Enterovirus Infections	Shigellosis
Distal 22q11.2 microdeletion syndrome	Mycobacterium Infections	Chronic myeloid leukemia
Distal 22q11.2 microdeletion syndrome	Extrahepatic Cholangiocarcinoma	Chronic myeloid leukemia
Distal 22q11.2 microdeletion syndrome	Guillain-Barre Syndrome	Chemokine signaling pathway
Distal 22q11.2 microdeletion syndrome	Periodic fever	Chronic myeloid leukemia
Distal 22q11.2 microdeletion syndrome	Bowen's Disease	Chronic myeloid leukemia
Distal 22q11.2 microdeletion syndrome	Malignant neoplasm of prostate	Chronic myeloid leukemia
Distal 22q11.2 microdeletion syndrome	SVEINSSON CHORIORETINAL ATROPHY	Chronic myeloid leukemia
Distal 22q11.2 microdeletion syndrome	Psoriasis vulgaris	Chronic myeloid leukemia
Distal 22q11.2 microdeletion syndrome	Arteriosclerosis	Chronic myeloid leukemia
Distal 22q11.2 microdeletion syndrome	Atherosclerosis	Chronic myeloid leukemia
Distal 22q11.2 microdeletion syndrome	Bipolar Disorder	Chronic myeloid leukemia
Distal 22q11.2 microdeletion syndrome	Rheumatism	Pathways in cancer
Distal 22q11.2 microdeletion syndrome	Cognition Disorders	Chronic myeloid leukemia
Distal 22q11.2 microdeletion syndrome	Fibrosarcoma	Chronic myeloid leukemia
Distal 22q11.2 microdeletion syndrome	Heart Diseases	Chronic myeloid leukemia
Distal 22q11.2 microdeletion syndrome	Hyperlipidemia	Thyroid cancer
Distal 22q11.2 microdeletion syndrome	Actinic keratosis	Chronic myeloid leukemia
Distal 22q11.2 microdeletion syndrome	Neurodegenerative Disorders	Chronic myeloid leukemia
Distal 22q11.2 microdeletion syndrome	Lymphoma, Large-Cell, Follicular	Chronic myeloid leukemia
Distal 22q11.2 microdeletion syndrome	Influenza	Chronic myeloid leukemia
Distal 22q11.2 microdeletion syndrome	Squamous cell carcinoma of mouth	Chronic myeloid leukemia
Distal 22q11.2 microdeletion syndrome	Mental Retardation	Chronic myeloid leukemia
Distal 22q11.2 microdeletion syndrome	Mesothelioma	Chronic myeloid leukemia
Distal 22q11.2 microdeletion syndrome	Leishmaniasis, Visceral	Pathways in cancer
Distal 22q11.2 microdeletion syndrome	Rheumatoid Arthritis	Chronic myeloid leukemia
Distal 22q11.2 microdeletion syndrome	Histiocytosis, Langerhans-Cell	Chronic myeloid leukemia
Distal 22q11.2 microdeletion syndrome	Female infertility	Chronic myeloid leukemia
Distal 22q11.2 microdeletion syndrome	Sterility, Postpartum	Chronic myeloid leukemia
Distal 22q11.2 microdeletion syndrome	Neurofibromatoses	Chronic myeloid leukemia
Distal 22q11.2 microdeletion syndrome	Nerve Sheath Tumors	Chronic myeloid leukemia
Distal 22q11.2 microdeletion syndrome	Subfertility, Female	Chronic myeloid leukemia
Distal 22q11.2 microdeletion syndrome	Prostate carcinoma	Chronic myeloid leukemia
Distal 22q11.2 microdeletion syndrome	Dry skin	Chronic myeloid leukemia
Distal 22q11.2 microdeletion syndrome	Female sterility	Chronic myeloid leukemia
Distal 22q11.2 microdeletion syndrome	Pulmonary Sclerosing Hemangioma	Chronic myeloid leukemia
Distal 22q11.2 microdeletion syndrome	Metastatic malignant neoplasm to brain	Chronic myeloid leukemia
Distal 22q11.2 microdeletion syndrome	Asbestosis	Chronic myeloid leukemia
Distal 22q11.2 microdeletion syndrome	Rhinovirus infection	Chronic myeloid leukemia
Distal 22q11.2 microdeletion syndrome	Dysplastic Nevus	Chronic myeloid leukemia
Distal 22q11.2 microdeletion syndrome	Respiratory syncytial virus (RSV) infection in conditions classified elsewhere and of unspecified site	Chronic myeloid leukemia
Distal 22q11.2 microdeletion syndrome	Breast Carcinoma	Chronic myeloid leukemia
Distal 22q11.2 microdeletion syndrome	Osteosarcoma of bone	Chronic myeloid leukemia
Distal 22q11.2 microdeletion syndrome	Endothelial dysfunction	Chronic myeloid leukemia
Distal 22q11.2 microdeletion syndrome	Vascular inflammations	Chronic myeloid leukemia
Distal 22q11.2 microdeletion syndrome	Genetic Diseases, Inborn	Chronic myeloid leukemia
Distal 22q11.2 microdeletion syndrome	Japanese Encephalitis	Chronic myeloid leukemia
Distal 22q11.2 microdeletion syndrome	Nasopharyngeal carcinoma	Chronic myeloid leukemia
Distal 22q11.2 microdeletion syndrome	Juvenile arthritis	Pathways in cancer
Distal 22q11.2 microdeletion syndrome	Acquired flat foot	Chronic myeloid leukemia
Distal 22q11.2 microdeletion syndrome	Pneumonitis	Chronic myeloid leukemia
Distal 22q11.2 microdeletion syndrome	Small cell carcinoma of lung	Chronic myeloid leukemia
Distal 22q11.2 microdeletion syndrome	Malignant tumor of colon	Chronic myeloid leukemia
Distal 22q11.2 microdeletion syndrome	Pneumonia	Chronic myeloid leukemia
Distal 22q11.2 microdeletion syndrome	Cocaine-Related Disorders	Chronic myeloid leukemia
Distal 22q11.2 microdeletion syndrome	Verrucous carcinoma	Chronic myeloid leukemia
Distal 22q11.2 microdeletion syndrome	Plasma cell dyscrasia	Chronic myeloid leukemia
Distal 22q11.2 microdeletion syndrome	Fetal Alcohol Spectrum Disorders	Chronic myeloid leukemia
Distal 22q11.2 microdeletion syndrome	Liver carcinoma	Chronic myeloid leukemia
Distal 22q11.2 microdeletion syndrome	Rat Adrenal Gland Pheochromocytoma	Chronic myeloid leukemia
Distal 22q11.2 microdeletion syndrome	Immune System Diseases	Chronic myeloid leukemia
Distal 22q11.2 microdeletion syndrome	Astrocytosis	Chronic myeloid leukemia
Distal 22q11.2 microdeletion syndrome	Hyperglycemia	Chronic myeloid leukemia
Distal 22q11.2 microdeletion syndrome	Tuberous Sclerosis	Chronic myeloid leukemia
Distal 22q11.2 microdeletion syndrome	Low intelligence	Chronic myeloid leukemia
Distal 22q11.2 microdeletion syndrome	Mental deficiency	Chronic myeloid leukemia
Distal 22q11.2 microdeletion syndrome	Cardio-facio-cutaneous syndrome	Chronic myeloid leukemia
Distal 22q11.2 microdeletion syndrome	Barrett's Adenocarcinoma	Chronic myeloid leukemia
Distal 22q11.2 microdeletion syndrome	Colonic Neoplasms	Chronic myeloid leukemia
Distal 22q11.2 microdeletion syndrome	Poor school performance	Chronic myeloid leukemia
Distal 22q11.2 microdeletion syndrome	Adenoma	Chronic myeloid leukemia
Distal 22q11.2 microdeletion syndrome	Gastrointestinal mucositis	Chronic myeloid leukemia
Distal 22q11.2 microdeletion syndrome	Alcoholic Intoxication, Chronic	Chronic myeloid leukemia
Distal 22q11.2 microdeletion syndrome	Infection	Chronic myeloid leukemia
Distal 22q11.2 microdeletion syndrome	Van der Woude syndrome	Chronic myeloid leukemia
Distal 22q11.2 microdeletion syndrome	Dull intelligence	Chronic myeloid leukemia
Distal 22q11.2 microdeletion syndrome	Burkitt Lymphoma	Chronic myeloid leukemia
Distal 22q11.2 microdeletion syndrome	Kidney Neoplasm	Chronic myeloid leukemia
Distal 22q11.2 microdeletion syndrome	Malignant Neoplasms	Chronic myeloid leukemia
Distal 22q11.2 microdeletion syndrome	Acute Erythroblastic Leukemia	Chronic myeloid leukemia
Distal 22q11.2 microdeletion syndrome	Muckle-Wells Syndrome	Chronic myeloid leukemia
Distal 22q11.2 microdeletion syndrome	Reoviridae Infections	Chronic myeloid leukemia
Distal 22q11.2 microdeletion syndrome	Leukemia, Myelomonocytic, Chronic	Chronic myeloid leukemia
Distal 22q11.2 microdeletion syndrome	Adult T-Cell Lymphoma/Leukemia	Chronic myeloid leukemia
Distal 22q11.2 microdeletion syndrome	Osteosclerosis	Chronic myeloid leukemia
Distal 22q11.2 microdeletion syndrome	Hereditary gingival fibromatosis	Chronic myeloid leukemia
Distal 22q11.2 microdeletion syndrome	Squamous cell carcinoma	Chronic myeloid leukemia
Distal 22q11.2 microdeletion syndrome	Sezary Syndrome	Chronic myeloid leukemia
Distal 22q11.2 microdeletion syndrome	Werner Syndrome	Chronic myeloid leukemia
Distal 22q11.2 microdeletion syndrome	Acute leukemia	Chronic myeloid leukemia
Distal 22q11.2 microdeletion syndrome	Primary infection NOS	Pathways in cancer
Distal 22q11.2 microdeletion syndrome	Disease due to Parvoviridae	Chronic myeloid leukemia
Distal 22q11.2 microdeletion syndrome	Cystic Fibrosis	Chronic myeloid leukemia
Distal 22q11.2 microdeletion syndrome	Neoplasm, Residual	Chronic myeloid leukemia
Distal 22q11.2 microdeletion syndrome	Carcinoma breast stage IV	Chronic myeloid leukemia
Distal 22q11.2 microdeletion syndrome	Periapical Periodontitis	Chronic myeloid leukemia
Distal 22q11.2 microdeletion syndrome	Ulcerative Colitis	Chronic myeloid leukemia
Distal 22q11.2 microdeletion syndrome	Adenocarcinoma Of Esophagus	Chronic myeloid leukemia
Distal 22q11.2 microdeletion syndrome	Juvenile Myelomonocytic Leukemia	Chronic myeloid leukemia
Distal 22q11.2 microdeletion syndrome	Colorectal Carcinoma	Chronic myeloid leukemia
Distal 22q11.2 microdeletion syndrome	Hematopoietic Neoplasms	Chronic myeloid leukemia
Distal 22q11.2 microdeletion syndrome	Refractory cancer	Chronic myeloid leukemia
Distal 22q11.2 microdeletion syndrome	Colorectal Neoplasms	Chronic myeloid leukemia
Distal 22q11.2 microdeletion syndrome	Precursor B-cell lymphoblastic leukemia	Chronic myeloid leukemia
Distal 22q11.2 microdeletion syndrome	Coronary Restenosis	Chronic myeloid leukemia
Distal 22q11.2 microdeletion syndrome	Cholesteatoma	Chronic myeloid leukemia
Distal 22q11.2 microdeletion syndrome	Hepatitis B	Chronic myeloid leukemia
Distal 22q11.2 microdeletion syndrome	Promyelocytic leukemia	Chronic myeloid leukemia
Distal 22q11.2 microdeletion syndrome	Triple Negative Breast Neoplasms	Chronic myeloid leukemia
Distal 22q11.2 microdeletion syndrome	leukemia	Chronic myeloid leukemia
Distal 22q11.2 microdeletion syndrome	Cardiomegaly	Chronic myeloid leukemia
Distal 22q11.2 microdeletion syndrome	Acute lymphocytic leukemia	Chronic myeloid leukemia
Distal 22q11.2 microdeletion syndrome	Pancreatic Ductal Adenocarcinoma	Chronic myeloid leukemia
Distal 22q11.2 microdeletion syndrome	Atrial Fibrillation	Chronic myeloid leukemia
Distal 22q11.2 microdeletion syndrome	Acute Promyelocytic Leukemia	Chronic myeloid leukemia
Distal 22q11.2 microdeletion syndrome	Cytomegalovirus Infections	Chronic myeloid leukemia
Distal 22q11.2 microdeletion syndrome	Graft-vs-Host Disease	Pathways in cancer
Distal 22q11.2 microdeletion syndrome	Lymphoma	Chronic myeloid leukemia
Distal 22q11.2 microdeletion syndrome	CEROID LIPOFUSCINOSIS, NEURONAL, 6	Chronic myeloid leukemia
Distal 22q11.2 microdeletion syndrome	Yellow Fever	Chronic myeloid leukemia
Distal 22q11.2 microdeletion syndrome	Lymphoma, Non-Hodgkin	Chronic myeloid leukemia
Distal 22q11.2 microdeletion syndrome	Vitiligo	Chronic myeloid leukemia
Distal 22q11.2 microdeletion syndrome	Malignant neoplasm of stomach	Chronic myeloid leukemia
Distal 22q11.2 microdeletion syndrome	Neuroendocrine Tumors	Chronic myeloid leukemia
Distal 22q11.2 microdeletion syndrome	Neoplasms	Chronic myeloid leukemia
Distal 22q11.2 microdeletion syndrome	Malignant neoplasm of gastrointestinal tract	Chronic myeloid leukemia
Distal 22q11.2 microdeletion syndrome	Neuroblastoma	Chronic myeloid leukemia
Distal 22q11.2 microdeletion syndrome	Cerebral Ischemia	Chronic myeloid leukemia
Distal 22q11.2 microdeletion syndrome	Cardiomyopathy, Familial Idiopathic	Chronic myeloid leukemia
Distal 22q11.2 microdeletion syndrome	VITILIGO-ASSOCIATED MULTIPLE AUTOIMMUNE DISEASE SUSCEPTIBILITY 1 (finding)	Chronic myeloid leukemia
Distal 22q11.2 microdeletion syndrome	Medulloblastoma	Chronic myeloid leukemia
Distal 22q11.2 microdeletion syndrome	Anaplastic astrocytoma	Chronic myeloid leukemia
Distal 22q11.2 microdeletion syndrome	Tumor Angiogenesis	Chronic myeloid leukemia
Distal 22q11.2 microdeletion syndrome	Rotavirus Infections	Chronic myeloid leukemia
Distal 22q11.2 microdeletion syndrome	Scrub Typhus	Chronic myeloid leukemia
Distal 22q11.2 microdeletion syndrome	Destructive Arthritis	Chronic myeloid leukemia
Distal 22q11.2 microdeletion syndrome	Parkinson Disease, Familial, Type 1	Chronic myeloid leukemia
Distal 22q11.2 microdeletion syndrome	Psoriasis	Chronic myeloid leukemia
Distal 22q11.2 microdeletion syndrome	Pemphigus Vulgaris	Chronic myeloid leukemia
Distal 22q11.2 microdeletion syndrome	Adrenocortical carcinoma	Chronic myeloid leukemia
Familial multiple meningioma	Depressive disorder	Pathways in cancer
Familial multiple meningioma	Carcinoma of lung	Pathways in cancer
Familial multiple meningioma	Mammary Neoplasms	Pathways in cancer
Familial multiple meningioma	Brain Neoplasms	Pathways in cancer
Familial multiple meningioma	Glioma	Pathways in cancer
Familial multiple meningioma	Fibrosis	Pathways in cancer
Familial multiple meningioma	IGA Glomerulonephritis	Pathways in cancer
Familial multiple meningioma	Subcutaneous nodule	Pathways in cancer
Familial multiple meningioma	Malignant Glioma	Pathways in cancer
Familial multiple meningioma	Multiple, subcutaneous nodules	Pathways in cancer
Familial multiple meningioma	Myeloid Leukemia	Pathways in cancer
Familial multiple meningioma	Pancreatic Neoplasm	Pathways in cancer
Familial multiple meningioma	Systemic Scleroderma	Pathways in cancer
Familial multiple meningioma	Thyroid Neoplasm	Pathways in cancer
Familial multiple meningioma	Glioblastoma	Pathways in cancer
Familial multiple meningioma	Carcinoma, Papillary	Pathways in cancer
Familial multiple meningioma	Lung Neoplasms	Pathways in cancer
Familial multiple meningioma	Neck Neoplasms	Pathways in cancer
Familial multiple meningioma	Glomerulonephritis	Pathways in cancer
Familial multiple meningioma	Neoplasm Metastasis	Pathways in cancer
Familial multiple meningioma	Malignant mesothelioma	Pathways in cancer
Familial multiple meningioma	Malignant neoplasm of skin	Pathways in cancer
Familial multiple meningioma	Meningioma, benign, no ICD-O subtype	Pathways in cancer
Familial multiple meningioma	Malignant Fibrous Histiocytoma	Pathways in cancer
Familial multiple meningioma	ovarian neoplasm	Pathways in cancer
Familial multiple meningioma	Fibromatosis, Aggressive	Pathways in cancer
Familial multiple meningioma	Skin carcinoma	Pathways in cancer
Familial multiple meningioma	Fibrosarcoma	Pathways in cancer
Familial multiple meningioma	Mesothelioma	Pathways in cancer
Familial multiple meningioma	Histiocytosis, Langerhans-Cell	Pathways in cancer
Familial multiple meningioma	Breast Carcinoma	Pathways in cancer
Familial multiple meningioma	Osteosarcoma of bone	Pathways in cancer
Familial multiple meningioma	Liver carcinoma	Pathways in cancer
Familial multiple meningioma	Colorectal Neoplasms	Pathways in cancer
Familial multiple meningioma	Medulloblastoma	Pathways in cancer
Autosomal dominant Robinow syndrome	Adenocarcinoma	Basal cell carcinoma
Autosomal dominant Robinow syndrome	Pancreatic carcinoma	Basal cell carcinoma
Autosomal dominant Robinow syndrome	Median cleft lip and palate	Basal cell carcinoma
Autosomal dominant Robinow syndrome	Malignant neoplasm of pancreas	Basal cell carcinoma
Autosomal dominant Robinow syndrome	Carcinogenesis	Basal cell carcinoma
Autosomal dominant Robinow syndrome	Leukemogenesis	Basal cell carcinoma
Autosomal dominant Robinow syndrome	Carcinoma of lung	Basal cell carcinoma
Autosomal dominant Robinow syndrome	Stomach Carcinoma	Basal cell carcinoma
Autosomal dominant Robinow syndrome	Carcinoma of bladder	Basal cell carcinoma
Autosomal dominant Robinow syndrome	Central neuroblastoma	Basal cell carcinoma
Autosomal dominant Robinow syndrome	Orbital separation excessive	Basal cell carcinoma
Autosomal dominant Robinow syndrome	Frontal bossing	Basal cell carcinoma
Autosomal dominant Robinow syndrome	Depressed nasal bridge	Basal cell carcinoma
Autosomal dominant Robinow syndrome	Depressed nasal root/bridge	Basal cell carcinoma
Autosomal dominant Robinow syndrome	Concave bridge of nose	Basal cell carcinoma
Autosomal dominant Robinow syndrome	Dwarfism	Basal cell carcinoma
Autosomal dominant Robinow syndrome	Primary malignant neoplasm of lung	Basal cell carcinoma
Autosomal dominant Robinow syndrome	Micromelia	Basal cell carcinoma
Autosomal dominant Robinow syndrome	Mammary Neoplasms	Basal cell carcinoma
Autosomal dominant Robinow syndrome	Colorectal Cancer	Basal cell carcinoma
Autosomal dominant Robinow syndrome	Pectus excavatum	Basal cell carcinoma
Autosomal dominant Robinow syndrome	Brain Neoplasms	Basal cell carcinoma
Autosomal dominant Robinow syndrome	Non-Small Cell Lung Carcinoma	Basal cell carcinoma
Autosomal dominant Robinow syndrome	Hydronephrosis	Basal cell carcinoma
Autosomal dominant Robinow syndrome	High forehead	Basal cell carcinoma
Autosomal dominant Robinow syndrome	Secondary malignant neoplasm of liver	Basal cell carcinoma
Autosomal dominant Robinow syndrome	Congenital euryblepharon	Basal cell carcinoma
Autosomal dominant Robinow syndrome	Long palpebral fissure	Basal cell carcinoma
Autosomal dominant Robinow syndrome	Hypoplastic mandible condyle	Basal cell carcinoma
Autosomal dominant Robinow syndrome	Long philtrum	Basal cell carcinoma
Autosomal dominant Robinow syndrome	Aplasia/Hypoplasia of the mandible	Basal cell carcinoma
Autosomal dominant Robinow syndrome	Kabuki syndrome eyelids	Basal cell carcinoma
Autosomal dominant Robinow syndrome	Decreased projection of lower jaw	Basal cell carcinoma
Autosomal dominant Robinow syndrome	Decreased projection of mandible	Basal cell carcinoma
Autosomal dominant Robinow syndrome	Retrusion of lower jaw	Basal cell carcinoma
Autosomal dominant Robinow syndrome	Glioma	Basal cell carcinoma
Autosomal dominant Robinow syndrome	Curvature of little finger	Basal cell carcinoma
Autosomal dominant Robinow syndrome	Ovarian Carcinoma	Basal cell carcinoma
Autosomal dominant Robinow syndrome	Pancreatic Neoplasm	Basal cell carcinoma
Autosomal dominant Robinow syndrome	Stomach Neoplasms	Basal cell carcinoma
Autosomal dominant Robinow syndrome	Thyroid Neoplasm	Basal cell carcinoma
Autosomal dominant Robinow syndrome	Glioblastoma	Basal cell carcinoma
Autosomal dominant Robinow syndrome	Secondary malignant neoplasm of lung	Melanogenesis
Autosomal dominant Robinow syndrome	Metastatic melanoma	Melanogenesis
Autosomal dominant Robinow syndrome	Lung Neoplasms	Basal cell carcinoma
Autosomal dominant Robinow syndrome	Tumor Progression	Basal cell carcinoma
Autosomal dominant Robinow syndrome	Increased head circumference	Basal cell carcinoma
Autosomal dominant Robinow syndrome	Increased size of skull	Basal cell carcinoma
Autosomal dominant Robinow syndrome	Big calvaria	Basal cell carcinoma
Autosomal dominant Robinow syndrome	Squamous cell carcinoma of esophagus	Basal cell carcinoma
Autosomal dominant Robinow syndrome	Neoplasm Metastasis	Basal cell carcinoma
Autosomal dominant Robinow syndrome	Epithelial ovarian cancer	Basal cell carcinoma
Autosomal dominant Robinow syndrome	Ewings sarcoma	Melanogenesis
Autosomal dominant Robinow syndrome	Experimental Organism Basal Cell Carcinoma	Basal cell carcinoma
Autosomal dominant Robinow syndrome	Malignant neoplasm of ovary	Basal cell carcinoma
Autosomal dominant Robinow syndrome	Obesity	Melanogenesis
Autosomal dominant Robinow syndrome	Embryonal Carcinoma	Basal cell carcinoma
Autosomal dominant Robinow syndrome	cervical cancer	Basal cell carcinoma
Autosomal dominant Robinow syndrome	Brachydactyly	Basal cell carcinoma
Autosomal dominant Robinow syndrome	Midface retrusion	Basal cell carcinoma
Autosomal dominant Robinow syndrome	Small midface	Basal cell carcinoma
Autosomal dominant Robinow syndrome	Hypotrophic midface	Basal cell carcinoma
Autosomal dominant Robinow syndrome	Decreased projection of midface	Basal cell carcinoma
Autosomal dominant Robinow syndrome	Prostatic Neoplasms	Basal cell carcinoma
Autosomal dominant Robinow syndrome	Malar flattening	Basal cell carcinoma
Autosomal dominant Robinow syndrome	Hypotrophic malar bone	Basal cell carcinoma
Autosomal dominant Robinow syndrome	Intestinal Neoplasms	Basal cell carcinoma
Autosomal dominant Robinow syndrome	Prominent eyes	Basal cell carcinoma
Autosomal dominant Robinow syndrome	Protruding eyes	Basal cell carcinoma
Autosomal dominant Robinow syndrome	Prominent globes	Basal cell carcinoma
Autosomal dominant Robinow syndrome	invasive cancer	Basal cell carcinoma
Autosomal dominant Robinow syndrome	Uterine Cervical Neoplasm	Basal cell carcinoma
Autosomal dominant Robinow syndrome	Cognitive delay	Basal cell carcinoma
Autosomal dominant Robinow syndrome	Intellectual Disability	Basal cell carcinoma
Autosomal dominant Robinow syndrome	Mental and motor retardation	Basal cell carcinoma
Autosomal dominant Robinow syndrome	Malignant neoplasm of lung	Basal cell carcinoma
Autosomal dominant Robinow syndrome	Congenital clinodactyly	Basal cell carcinoma
Autosomal dominant Robinow syndrome	Curvature of digit	Basal cell carcinoma
Autosomal dominant Robinow syndrome	Malignant neoplasm of prostate	Basal cell carcinoma
Autosomal dominant Robinow syndrome	Retrognathia	Basal cell carcinoma
Autosomal dominant Robinow syndrome	Mental Retardation	Basal cell carcinoma
Autosomal dominant Robinow syndrome	Prostate carcinoma	Basal cell carcinoma
Autosomal dominant Robinow syndrome	Metastatic malignant neoplasm to brain	Basal cell carcinoma
Autosomal dominant Robinow syndrome	Breast Carcinoma	Basal cell carcinoma
Autosomal dominant Robinow syndrome	Osteosarcoma of bone	Basal cell carcinoma
Autosomal dominant Robinow syndrome	Angle class 3 malocclusion	Melanogenesis
Autosomal dominant Robinow syndrome	Angle class 2 malocclusion	Melanogenesis
Autosomal dominant Robinow syndrome	Prominent forehead	Basal cell carcinoma
Autosomal dominant Robinow syndrome	Bulging forehead	Basal cell carcinoma
Autosomal dominant Robinow syndrome	Nasopharyngeal carcinoma	Melanogenesis
Autosomal dominant Robinow syndrome	Tooth size discrepancy	Basal cell carcinoma
Autosomal dominant Robinow syndrome	Tooth mass arch size discrepancy	Basal cell carcinoma
Autosomal dominant Robinow syndrome	Inadequate arch length for tooth size	Basal cell carcinoma
Autosomal dominant Robinow syndrome	Short palm	Basal cell carcinoma
Autosomal dominant Robinow syndrome	Robinow Syndrome	Basal cell carcinoma
Autosomal dominant Robinow syndrome	Malignant tumor of colon	Basal cell carcinoma
Autosomal dominant Robinow syndrome	Liver carcinoma	Basal cell carcinoma
Autosomal dominant Robinow syndrome	Agenesis	Basal cell carcinoma
Autosomal dominant Robinow syndrome	Low intelligence	Melanogenesis
Autosomal dominant Robinow syndrome	Open Bite	Basal cell carcinoma
Autosomal dominant Robinow syndrome	Mental deficiency	Melanogenesis
Autosomal dominant Robinow syndrome	Colonic Neoplasms	Basal cell carcinoma
Autosomal dominant Robinow syndrome	Congenital Abnormality	Basal cell carcinoma
Autosomal dominant Robinow syndrome	Desmoplastic	Basal cell carcinoma
Autosomal dominant Robinow syndrome	Poor school performance	Melanogenesis
Autosomal dominant Robinow syndrome	Nasal bridge wide	Basal cell carcinoma
Autosomal dominant Robinow syndrome	Dull intelligence	Melanogenesis
Autosomal dominant Robinow syndrome	Malignant neoplasm of urinary bladder	Basal cell carcinoma
Autosomal dominant Robinow syndrome	Bladder Neoplasm	Basal cell carcinoma
Autosomal dominant Robinow syndrome	Squamous cell carcinoma	Basal cell carcinoma
Autosomal dominant Robinow syndrome	Colorectal Carcinoma	Basal cell carcinoma
Autosomal dominant Robinow syndrome	Hematopoietic Neoplasms	Basal cell carcinoma
Autosomal dominant Robinow syndrome	Refractory cancer	Basal cell carcinoma
Autosomal dominant Robinow syndrome	Hepatitis B	Basal cell carcinoma
Autosomal dominant Robinow syndrome	leukemia	Basal cell carcinoma
Autosomal dominant Robinow syndrome	Acute lymphocytic leukemia	Basal cell carcinoma
Autosomal dominant Robinow syndrome	Carcinoma, Transitional Cell	Melanogenesis
Autosomal dominant Robinow syndrome	Acute Promyelocytic Leukemia	Basal cell carcinoma
Autosomal dominant Robinow syndrome	Malignant neoplasm of stomach	Basal cell carcinoma
Autosomal dominant Robinow syndrome	Neuroblastoma	Basal cell carcinoma
Autosomal dominant Robinow syndrome	polyps	Basal cell carcinoma
Autosomal dominant Robinow syndrome	Medulloblastoma	Basal cell carcinoma
Autosomal dominant Robinow syndrome	Tumor Angiogenesis	Melanogenesis
Baraitser-Winter cerebrofrontofacial syndrome	Aphasia	Vibrio cholerae infection
Baraitser-Winter cerebrofrontofacial syndrome	Echolalia	Vibrio cholerae infection
Baraitser-Winter cerebrofrontofacial syndrome	Mutism	Vibrio cholerae infection
Baraitser-Winter cerebrofrontofacial syndrome	Osteochondrosis	Vibrio cholerae infection
Baraitser-Winter cerebrofrontofacial syndrome	Ptosis	Vibrio cholerae infection
Baraitser-Winter cerebrofrontofacial syndrome	Retinoschisis	Vibrio cholerae infection
Baraitser-Winter cerebrofrontofacial syndrome	Trigonocephaly	Vibrio cholerae infection
Baraitser-Winter cerebrofrontofacial syndrome	Cranioschisis	Vibrio cholerae infection
Baraitser-Winter cerebrofrontofacial syndrome	Late fontanel closure	Vibrio cholerae infection
Baraitser-Winter cerebrofrontofacial syndrome	Heterochromia iridis	Vibrio cholerae infection
Baraitser-Winter cerebrofrontofacial syndrome	Large nose	Vibrio cholerae infection
Baraitser-Winter cerebrofrontofacial syndrome	Congenital neurologic anomalies	Vibrio cholerae infection
Baraitser-Winter cerebrofrontofacial syndrome	Dysphasia	Vibrio cholerae infection
Baraitser-Winter cerebrofrontofacial syndrome	Congenital euryblepharon	Vibrio cholerae infection
Baraitser-Winter cerebrofrontofacial syndrome	Hypertrophy of nose	Vibrio cholerae infection
Baraitser-Winter cerebrofrontofacial syndrome	Cerebrofrontofacial Syndrome	Vibrio cholerae infection
Baraitser-Winter cerebrofrontofacial syndrome	Long nose	Vibrio cholerae infection
Baraitser-Winter cerebrofrontofacial syndrome	Long palpebral fissure	Vibrio cholerae infection
Baraitser-Winter cerebrofrontofacial syndrome	Iris Coloboma with Ptosis, Hypertelorism, and Mental Retardation	Vibrio cholerae infection
Baraitser-Winter cerebrofrontofacial syndrome	Low posterior hairline	Vibrio cholerae infection
Baraitser-Winter cerebrofrontofacial syndrome	Short columella	Vibrio cholerae infection
Baraitser-Winter cerebrofrontofacial syndrome	Prominent metopic ridge	Vibrio cholerae infection
Baraitser-Winter cerebrofrontofacial syndrome	Depressed nasal tip	Vibrio cholerae infection
Baraitser-Winter cerebrofrontofacial syndrome	Highly arched eyebrow	Vibrio cholerae infection
Baraitser-Winter cerebrofrontofacial syndrome	Agyria	Vibrio cholerae infection
Baraitser-Winter cerebrofrontofacial syndrome	Bowed and upward slanting eyebrows	Vibrio cholerae infection
Baraitser-Winter cerebrofrontofacial syndrome	Uroureter	Vibrio cholerae infection
Baraitser-Winter cerebrofrontofacial syndrome	Cerebral cortical hemiatrophy	Vibrio cholerae infection
Baraitser-Winter cerebrofrontofacial syndrome	Subcortical cerebral atrophy	Vibrio cholerae infection
Baraitser-Winter cerebrofrontofacial syndrome	Large bregma sutures	Vibrio cholerae infection
Baraitser-Winter cerebrofrontofacial syndrome	Large, late-closing fontanelle	Vibrio cholerae infection
Baraitser-Winter cerebrofrontofacial syndrome	Wide bregma sutures	Vibrio cholerae infection
Baraitser-Winter cerebrofrontofacial syndrome	Kabuki syndrome eyelids	Vibrio cholerae infection
Baraitser-Winter cerebrofrontofacial syndrome	Repeated speech	Vibrio cholerae infection
Baraitser-Winter cerebrofrontofacial syndrome	Hypoplasia of columella	Vibrio cholerae infection
Baraitser-Winter cerebrofrontofacial syndrome	Hyperplasia of nose	Vibrio cholerae infection
Baraitser-Winter cerebrofrontofacial syndrome	Wedge shaped head	Vibrio cholerae infection
Baraitser-Winter cerebrofrontofacial syndrome	Triangular head shape	Vibrio cholerae infection
Isolated focal cortical dysplasia type IIb	Adenocarcinoma	mTOR signaling pathway
Isolated focal cortical dysplasia type IIb	Down Syndrome	Acute myeloid leukemia
Isolated focal cortical dysplasia type IIb	T-Cell Lymphoma	mTOR signaling pathway
Isolated focal cortical dysplasia type IIb	Adenoid Cystic Carcinoma	mTOR signaling pathway
Isolated focal cortical dysplasia type IIb	Hypoglycemia	mTOR signaling pathway
Isolated focal cortical dysplasia type IIb	Liver and Intrahepatic Biliary Tract Carcinoma	mTOR signaling pathway
Isolated focal cortical dysplasia type IIb	Malignant neoplasm of mouth	mTOR signaling pathway
Isolated focal cortical dysplasia type IIb	Lip and Oral Cavity Carcinoma	mTOR signaling pathway
Isolated focal cortical dysplasia type IIb	Pancreatic carcinoma	mTOR signaling pathway
Isolated focal cortical dysplasia type IIb	Anoxia	mTOR signaling pathway
Isolated focal cortical dysplasia type IIb	Septicemia	mTOR signaling pathway
Isolated focal cortical dysplasia type IIb	Sepsis	mTOR signaling pathway
Isolated focal cortical dysplasia type IIb	Conventional (Clear Cell) Renal Cell Carcinoma	mTOR signaling pathway
Isolated focal cortical dysplasia type IIb	Mammary Tumorigenesis	mTOR signaling pathway
Isolated focal cortical dysplasia type IIb	Clear-cell metastatic renal cell carcinoma	mTOR signaling pathway
Isolated focal cortical dysplasia type IIb	Gastric Adenocarcinoma	mTOR signaling pathway
Isolated focal cortical dysplasia type IIb	Chronic Kidney Diseases	mTOR signaling pathway
Isolated focal cortical dysplasia type IIb	Malignant neoplasm of pancreas	mTOR signaling pathway
Isolated focal cortical dysplasia type IIb	Malignant neoplasm of esophagus	mTOR signaling pathway
Isolated focal cortical dysplasia type IIb	Carcinogenesis	mTOR signaling pathway
Isolated focal cortical dysplasia type IIb	Leukemogenesis	mTOR signaling pathway
Isolated focal cortical dysplasia type IIb	Carcinoma of lung	mTOR signaling pathway
Isolated focal cortical dysplasia type IIb	Collecting Duct Carcinoma of the Kidney	mTOR signaling pathway
Isolated focal cortical dysplasia type IIb	Diabetes	mTOR signaling pathway
Isolated focal cortical dysplasia type IIb	Stomach Carcinoma	mTOR signaling pathway
Isolated focal cortical dysplasia type IIb	Papillary Renal Cell Carcinoma	mTOR signaling pathway
Isolated focal cortical dysplasia type IIb	Carcinoma of bladder	mTOR signaling pathway
Isolated focal cortical dysplasia type IIb	Central neuroblastoma	mTOR signaling pathway
Isolated focal cortical dysplasia type IIb	Lupus Vulgaris	Acute myeloid leukemia
Isolated focal cortical dysplasia type IIb	Lupus Erythematosus, Discoid	Type II diabetes mellitus
Isolated focal cortical dysplasia type IIb	Lupus Erythematosus	Type II diabetes mellitus
Isolated focal cortical dysplasia type IIb	Malignant Squamous Cell Neoplasm	mTOR signaling pathway
Isolated focal cortical dysplasia type IIb	Orbital separation excessive	mTOR signaling pathway
Isolated focal cortical dysplasia type IIb	Frontal bossing	mTOR signaling pathway
Isolated focal cortical dysplasia type IIb	Depressed nasal bridge	mTOR signaling pathway
Isolated focal cortical dysplasia type IIb	Squamous cell carcinoma of the head and neck	mTOR signaling pathway
Isolated focal cortical dysplasia type IIb	Depressed nasal root/bridge	mTOR signaling pathway
Isolated focal cortical dysplasia type IIb	Adenoma of large intestine	mTOR signaling pathway
Isolated focal cortical dysplasia type IIb	Concave bridge of nose	mTOR signaling pathway
Isolated focal cortical dysplasia type IIb	Fibroid Tumor	mTOR signaling pathway
Isolated focal cortical dysplasia type IIb	Diabetes Mellitus	mTOR signaling pathway
Isolated focal cortical dysplasia type IIb	Primary malignant neoplasm of lung	mTOR signaling pathway
Isolated focal cortical dysplasia type IIb	Mammary Neoplasms	mTOR signaling pathway
Isolated focal cortical dysplasia type IIb	Gastrointestinal Carcinoid Tumor	mTOR signaling pathway
Isolated focal cortical dysplasia type IIb	Colorectal Cancer	mTOR signaling pathway
Isolated focal cortical dysplasia type IIb	Non-medullary thyroid carcinoma	mTOR signaling pathway
Isolated focal cortical dysplasia type IIb	Brain Neoplasms	mTOR signaling pathway
Isolated focal cortical dysplasia type IIb	Endometrioma	mTOR signaling pathway
Isolated focal cortical dysplasia type IIb	Malignant neoplasm of thyroid	mTOR signaling pathway
Isolated focal cortical dysplasia type IIb	Ataxia Telangiectasia	mTOR signaling pathway
Isolated focal cortical dysplasia type IIb	Non-Small Cell Lung Carcinoma	mTOR signaling pathway
Isolated focal cortical dysplasia type IIb	Renal Cell Carcinoma	mTOR signaling pathway
Isolated focal cortical dysplasia type IIb	Malignant tumor of cervix	mTOR signaling pathway
Isolated focal cortical dysplasia type IIb	Pituitary Adenoma	mTOR signaling pathway
Isolated focal cortical dysplasia type IIb	High forehead	mTOR signaling pathway
Isolated focal cortical dysplasia type IIb	Carcinoma, Small Cell	mTOR signaling pathway
Isolated focal cortical dysplasia type IIb	Small nose	mTOR signaling pathway
Isolated focal cortical dysplasia type IIb	Hepatitis C, Chronic	Insulin signaling pathway
Isolated focal cortical dysplasia type IIb	Invasive carcinoma of breast	mTOR signaling pathway
Isolated focal cortical dysplasia type IIb	Kidney Failure, Acute	mTOR signaling pathway
Isolated focal cortical dysplasia type IIb	Short nose	mTOR signaling pathway
Isolated focal cortical dysplasia type IIb	Long philtrum	Insulin signaling pathway
Isolated focal cortical dysplasia type IIb	Malformations of Cortical Development	mTOR signaling pathway
Isolated focal cortical dysplasia type IIb	Endometriosis	mTOR signaling pathway
Isolated focal cortical dysplasia type IIb	Esophageal Neoplasms	mTOR signaling pathway
Isolated focal cortical dysplasia type IIb	Glioma	mTOR signaling pathway
Isolated focal cortical dysplasia type IIb	Adenocarcinoma, Clear Cell	mTOR signaling pathway
Isolated focal cortical dysplasia type IIb	Secondary malignant neoplasm of lymph node	mTOR signaling pathway
Isolated focal cortical dysplasia type IIb	Inflammatory Bowel Diseases	Glioma
Isolated focal cortical dysplasia type IIb	Sarcopenia	mTOR signaling pathway
Isolated focal cortical dysplasia type IIb	Childhood Acute Lymphoblastic Leukemia	Acute myeloid leukemia
Isolated focal cortical dysplasia type IIb	Subependymal Giant Cell Astrocytoma	mTOR signaling pathway
Isolated focal cortical dysplasia type IIb	Pilocytic Astrocytoma	mTOR signaling pathway
Isolated focal cortical dysplasia type IIb	Malignant Glioma	mTOR signaling pathway
Isolated focal cortical dysplasia type IIb	Pituitary Neoplasms	mTOR signaling pathway
Isolated focal cortical dysplasia type IIb	Chondrosarcoma	mTOR signaling pathway
Isolated focal cortical dysplasia type IIb	Ki-1+ Anaplastic Large Cell Lymphoma	mTOR signaling pathway
Isolated focal cortical dysplasia type IIb	Ovarian Carcinoma	mTOR signaling pathway
Isolated focal cortical dysplasia type IIb	Liver neoplasms	mTOR signaling pathway
Isolated focal cortical dysplasia type IIb	Pancreatic Neoplasm	mTOR signaling pathway
Isolated focal cortical dysplasia type IIb	Parkinson Disease	mTOR signaling pathway
Isolated focal cortical dysplasia type IIb	Stomach Neoplasms	mTOR signaling pathway
Isolated focal cortical dysplasia type IIb	Tuberculosis	mTOR signaling pathway
Isolated focal cortical dysplasia type IIb	Virus Diseases	mTOR signaling pathway
Isolated focal cortical dysplasia type IIb	Glioblastoma	mTOR signaling pathway
Isolated focal cortical dysplasia type IIb	Lung diseases	mTOR signaling pathway
Isolated focal cortical dysplasia type IIb	B-Cell Lymphomas	mTOR signaling pathway
Isolated focal cortical dysplasia type IIb	Diffuse Large B-Cell Lymphoma	mTOR signaling pathway
Isolated focal cortical dysplasia type IIb	Malignant lymphoma, lymphocytic, intermediate differentiation, diffuse	mTOR signaling pathway
Isolated focal cortical dysplasia type IIb	Malignant neoplasm of kidney	mTOR signaling pathway
Isolated focal cortical dysplasia type IIb	Renal carcinoma	mTOR signaling pathway
Isolated focal cortical dysplasia type IIb	Metastatic melanoma	mTOR signaling pathway
Isolated focal cortical dysplasia type IIb	Adenocarcinoma of lung (disorder)	mTOR signaling pathway
Isolated focal cortical dysplasia type IIb	Esophageal carcinoma	mTOR signaling pathway
Isolated focal cortical dysplasia type IIb	Lung Neoplasms	mTOR signaling pathway
Isolated focal cortical dysplasia type IIb	Neurofibromatosis 1	mTOR signaling pathway
Isolated focal cortical dysplasia type IIb	Tumor Progression	mTOR signaling pathway
Isolated focal cortical dysplasia type IIb	Mental impairment	mTOR signaling pathway
Isolated focal cortical dysplasia type IIb	Medullary carcinoma of thyroid	mTOR signaling pathway
Isolated focal cortical dysplasia type IIb	Malignant neoplasm of endometrium	mTOR signaling pathway
Isolated focal cortical dysplasia type IIb	Endometrial Carcinoma	mTOR signaling pathway
Isolated focal cortical dysplasia type IIb	Uterine Corpus Cancer	mTOR signaling pathway
Isolated focal cortical dysplasia type IIb	Drug Resistant Epilepsy	mTOR signaling pathway
Isolated focal cortical dysplasia type IIb	Increased head circumference	mTOR signaling pathway
Isolated focal cortical dysplasia type IIb	Increased size of skull	mTOR signaling pathway
Isolated focal cortical dysplasia type IIb	Big calvaria	mTOR signaling pathway
Isolated focal cortical dysplasia type IIb	Endometrial Neoplasms	mTOR signaling pathway
Isolated focal cortical dysplasia type IIb	Malignant Head and Neck Neoplasm	mTOR signaling pathway
Isolated focal cortical dysplasia type IIb	Skin Neoplasms	mTOR signaling pathway
Isolated focal cortical dysplasia type IIb	Transitional cell carcinoma of bladder	mTOR signaling pathway
Isolated focal cortical dysplasia type IIb	Neoplasm Metastasis	mTOR signaling pathway
Isolated focal cortical dysplasia type IIb	Solid Neoplasm	mTOR signaling pathway
Isolated focal cortical dysplasia type IIb	Cervix carcinoma	mTOR signaling pathway
Isolated focal cortical dysplasia type IIb	Malignant neoplasm of liver	mTOR signaling pathway
Isolated focal cortical dysplasia type IIb	Malignant mesothelioma	mTOR signaling pathway
Isolated focal cortical dysplasia type IIb	Epithelial ovarian cancer	mTOR signaling pathway
Isolated focal cortical dysplasia type IIb	Ewings sarcoma	mTOR signaling pathway
Isolated focal cortical dysplasia type IIb	Lymphangioleiomyomatosis	mTOR signaling pathway
Isolated focal cortical dysplasia type IIb	Urothelial Carcinoma	mTOR signaling pathway
Isolated focal cortical dysplasia type IIb	Experimental Organism Basal Cell Carcinoma	mTOR signaling pathway
Isolated focal cortical dysplasia type IIb	Stage IV Breast Cancer AJCC v6 and v7	mTOR signaling pathway
Isolated focal cortical dysplasia type IIb	Malignant Pleural Mesothelioma	mTOR signaling pathway
Isolated focal cortical dysplasia type IIb	Malignant neoplasm of ovary	mTOR signaling pathway
Isolated focal cortical dysplasia type IIb	Obesity	mTOR signaling pathway
Isolated focal cortical dysplasia type IIb	Strawberry nevus of skin	mTOR signaling pathway
Isolated focal cortical dysplasia type IIb	Hepatocarcinogenesis	mTOR signaling pathway
Isolated focal cortical dysplasia type IIb	Meningioma, benign, no ICD-O subtype	mTOR signaling pathway
Isolated focal cortical dysplasia type IIb	Autosomal Recessive Polycystic Kidney Disease	mTOR signaling pathway
Isolated focal cortical dysplasia type IIb	Ganglioglioma	mTOR signaling pathway
Isolated focal cortical dysplasia type IIb	cervical cancer	mTOR signaling pathway
Isolated focal cortical dysplasia type IIb	Midface retrusion	mTOR signaling pathway
Isolated focal cortical dysplasia type IIb	Small midface	mTOR signaling pathway
Isolated focal cortical dysplasia type IIb	Hypotrophic midface	mTOR signaling pathway
Isolated focal cortical dysplasia type IIb	Decreased projection of midface	mTOR signaling pathway
Isolated focal cortical dysplasia type IIb	Prostatic Neoplasms	mTOR signaling pathway
Isolated focal cortical dysplasia type IIb	Embryonal Rhabdomyosarcoma	mTOR signaling pathway
Isolated focal cortical dysplasia type IIb	Congestive heart failure	mTOR signaling pathway
Isolated focal cortical dysplasia type IIb	Cortical Dysplasia	mTOR signaling pathway
Isolated focal cortical dysplasia type IIb	Hepatitis C	mTOR signaling pathway
Isolated focal cortical dysplasia type IIb	Arthritis, Psoriatic	mTOR signaling pathway
Isolated focal cortical dysplasia type IIb	Vascular Diseases	Glioma
Isolated focal cortical dysplasia type IIb	Recurrent tumor	mTOR signaling pathway
Isolated focal cortical dysplasia type IIb	invasive cancer	mTOR signaling pathway
Isolated focal cortical dysplasia type IIb	ovarian neoplasm	mTOR signaling pathway
Isolated focal cortical dysplasia type IIb	Rhabdomyosarcoma	mTOR signaling pathway
Isolated focal cortical dysplasia type IIb	Uterine Cervical Neoplasm	mTOR signaling pathway
Isolated focal cortical dysplasia type IIb	Atrophic	mTOR signaling pathway
Isolated focal cortical dysplasia type IIb	Familial multiple trichoepitheliomata	mTOR signaling pathway
Isolated focal cortical dysplasia type IIb	Retinoblastoma	mTOR signaling pathway
Isolated focal cortical dysplasia type IIb	Unipolar Depression	mTOR signaling pathway
Isolated focal cortical dysplasia type IIb	Lymphoma, Lymphocytic, Intermediate	mTOR signaling pathway
Isolated focal cortical dysplasia type IIb	Bronchioloalveolar Adenocarcinoma	mTOR signaling pathway
Isolated focal cortical dysplasia type IIb	Epilepsies, Partial	mTOR signaling pathway
Isolated focal cortical dysplasia type IIb	Hamartoma Syndrome, Multiple	mTOR signaling pathway
Isolated focal cortical dysplasia type IIb	Hemangiosarcoma	mTOR signaling pathway
Isolated focal cortical dysplasia type IIb	Lipomatosis	mTOR signaling pathway
Isolated focal cortical dysplasia type IIb	Waldenstrom Macroglobulinemia	mTOR signaling pathway
Isolated focal cortical dysplasia type IIb	synovial sarcoma	mTOR signaling pathway
Isolated focal cortical dysplasia type IIb	LEOPARD Syndrome	mTOR signaling pathway
Isolated focal cortical dysplasia type IIb	Major Depressive Disorder	mTOR signaling pathway
Isolated focal cortical dysplasia type IIb	Liposarcoma, Myxoid	mTOR signaling pathway
Isolated focal cortical dysplasia type IIb	Mastocytosis, Systemic	Insulin signaling pathway
Isolated focal cortical dysplasia type IIb	Macrocephaly	mTOR signaling pathway
Isolated focal cortical dysplasia type IIb	Primary malignant neoplasm	mTOR signaling pathway
Isolated focal cortical dysplasia type IIb	Metastatic Renal Cell Cancer	mTOR signaling pathway
Isolated focal cortical dysplasia type IIb	Stage IV Bladder Cancer AJCC v6	mTOR signaling pathway
Isolated focal cortical dysplasia type IIb	Multiple malignancy	mTOR signaling pathway
Isolated focal cortical dysplasia type IIb	Hepatocellular Adenoma	mTOR signaling pathway
Isolated focal cortical dysplasia type IIb	Hemimegalencephaly	mTOR signaling pathway
Isolated focal cortical dysplasia type IIb	Biliary Tract Cancer	mTOR signaling pathway
Isolated focal cortical dysplasia type IIb	TUBEROUS SCLEROSIS 2 (disorder)	mTOR signaling pathway
Isolated focal cortical dysplasia type IIb	Megalencephaly cutis marmorata telangiectatica congenita	mTOR signaling pathway
Isolated focal cortical dysplasia type IIb	PTEN Hamartoma Tumor Syndrome	mTOR signaling pathway
Isolated focal cortical dysplasia type IIb	Macroencephaly	mTOR signaling pathway
Isolated focal cortical dysplasia type IIb	Epileptic encephalopathy	mTOR signaling pathway
Isolated focal cortical dysplasia type IIb	Mucoepidermoid Carcinoma	mTOR signaling pathway
Isolated focal cortical dysplasia type IIb	Intellectual Disability	Insulin signaling pathway
Isolated focal cortical dysplasia type IIb	Fanconi Anemia	Type II diabetes mellitus
Isolated focal cortical dysplasia type IIb	Multiple polyps	mTOR signaling pathway
Isolated focal cortical dysplasia type IIb	Herpes Simplex Infections	mTOR signaling pathway
Isolated focal cortical dysplasia type IIb	Malignant neoplasm of lung	mTOR signaling pathway
Isolated focal cortical dysplasia type IIb	FANCONI ANEMIA, COMPLEMENTATION GROUP A (disorder)	Type II diabetes mellitus
Isolated focal cortical dysplasia type IIb	Squamous cell carcinoma of penis	mTOR signaling pathway
Isolated focal cortical dysplasia type IIb	fibroma	mTOR signaling pathway
Isolated focal cortical dysplasia type IIb	Acinar Cell Carcinoma	mTOR signaling pathway
Isolated focal cortical dysplasia type IIb	Cervical Adenocarcinoma	mTOR signaling pathway
Isolated focal cortical dysplasia type IIb	Malignant neoplasm of prostate	mTOR signaling pathway
Isolated focal cortical dysplasia type IIb	Cognition Disorders	mTOR signaling pathway
Isolated focal cortical dysplasia type IIb	Heart Diseases	mTOR signaling pathway
Isolated focal cortical dysplasia type IIb	Neurodegenerative Disorders	mTOR signaling pathway
Isolated focal cortical dysplasia type IIb	Kidney Diseases	mTOR signaling pathway
Isolated focal cortical dysplasia type IIb	Lymphoproliferative Disorders	mTOR signaling pathway
Isolated focal cortical dysplasia type IIb	Mental Retardation	mTOR signaling pathway
Isolated focal cortical dysplasia type IIb	Mesothelioma	mTOR signaling pathway
Isolated focal cortical dysplasia type IIb	Metabolic Diseases	mTOR signaling pathway
Isolated focal cortical dysplasia type IIb	Phyllodes Tumor	mTOR signaling pathway
Isolated focal cortical dysplasia type IIb	Addictive Behavior	mTOR signaling pathway
Isolated focal cortical dysplasia type IIb	Prostate carcinoma	mTOR signaling pathway
Isolated focal cortical dysplasia type IIb	Malnutrition	mTOR signaling pathway
Isolated focal cortical dysplasia type IIb	Metastatic malignant neoplasm to brain	mTOR signaling pathway
Isolated focal cortical dysplasia type IIb	Papillary renal cell carcinoma, sporadic	mTOR signaling pathway
Isolated focal cortical dysplasia type IIb	Non-alcoholic Fatty Liver Disease	mTOR signaling pathway
Isolated focal cortical dysplasia type IIb	Metabolic Syndrome X	mTOR signaling pathway
Isolated focal cortical dysplasia type IIb	Breast Carcinoma	mTOR signaling pathway
Isolated focal cortical dysplasia type IIb	Osteosarcoma of bone	mTOR signaling pathway
Isolated focal cortical dysplasia type IIb	Pneumonitis	mTOR signaling pathway
Isolated focal cortical dysplasia type IIb	Small cell carcinoma of lung	mTOR signaling pathway
Isolated focal cortical dysplasia type IIb	Precursor T-Cell Lymphoblastic Leukemia-Lymphoma	mTOR signaling pathway
Isolated focal cortical dysplasia type IIb	Malignant tumor of colon	mTOR signaling pathway
Isolated focal cortical dysplasia type IIb	Pneumonia	mTOR signaling pathway
Isolated focal cortical dysplasia type IIb	Multiple Chronic Conditions	mTOR signaling pathway
Isolated focal cortical dysplasia type IIb	Interstitial lung fibrosis	mTOR signaling pathway
Isolated focal cortical dysplasia type IIb	Liver carcinoma	mTOR signaling pathway
Isolated focal cortical dysplasia type IIb	Graves Disease	mTOR signaling pathway
Isolated focal cortical dysplasia type IIb	Brain Diseases	mTOR signaling pathway
Isolated focal cortical dysplasia type IIb	Hamartoma	mTOR signaling pathway
Isolated focal cortical dysplasia type IIb	Hyperglycemia	mTOR signaling pathway
Isolated focal cortical dysplasia type IIb	Tuberous Sclerosis	mTOR signaling pathway
Isolated focal cortical dysplasia type IIb	Trichoepithelioma	mTOR signaling pathway
Isolated focal cortical dysplasia type IIb	Hematologic Neoplasms	mTOR signaling pathway
Isolated focal cortical dysplasia type IIb	Low intelligence	mTOR signaling pathway
Isolated focal cortical dysplasia type IIb	Malignant Uterine Corpus Neoplasm	mTOR signaling pathway
Isolated focal cortical dysplasia type IIb	Mental deficiency	mTOR signaling pathway
Isolated focal cortical dysplasia type IIb	Curly hair (finding)	mTOR signaling pathway
Isolated focal cortical dysplasia type IIb	Congenital Abnormality	mTOR signaling pathway
Isolated focal cortical dysplasia type IIb	Deep palmar crease	mTOR signaling pathway
Isolated focal cortical dysplasia type IIb	Poor school performance	mTOR signaling pathway
Isolated focal cortical dysplasia type IIb	Adenoma	mTOR signaling pathway
Isolated focal cortical dysplasia type IIb	Dull intelligence	mTOR signaling pathway
Isolated focal cortical dysplasia type IIb	Malignant neoplasm of urinary bladder	mTOR signaling pathway
Isolated focal cortical dysplasia type IIb	Primary Myelofibrosis	mTOR signaling pathway
Isolated focal cortical dysplasia type IIb	Bladder Neoplasm	mTOR signaling pathway
Isolated focal cortical dysplasia type IIb	Kidney Neoplasm	mTOR signaling pathway
Isolated focal cortical dysplasia type IIb	Malignant Neoplasms	mTOR signaling pathway
Isolated focal cortical dysplasia type IIb	Leukoencephalopathy, Progressive Multifocal	mTOR signaling pathway
Isolated focal cortical dysplasia type IIb	Other ureteric obstruction	mTOR signaling pathway
Isolated focal cortical dysplasia type IIb	Squamous cell carcinoma	mTOR signaling pathway
Isolated focal cortical dysplasia type IIb	Thymoma	mTOR signaling pathway
Isolated focal cortical dysplasia type IIb	Werner Syndrome	mTOR signaling pathway
Isolated focal cortical dysplasia type IIb	Severe Combined Immunodeficiency	mTOR signaling pathway
Isolated focal cortical dysplasia type IIb	Adenocarcinoma, Basal Cell	mTOR signaling pathway
Isolated focal cortical dysplasia type IIb	Adenocarcinoma, Oxyphilic	mTOR signaling pathway
Isolated focal cortical dysplasia type IIb	Carcinoma, Cribriform	mTOR signaling pathway
Isolated focal cortical dysplasia type IIb	Carcinoma, Granular Cell	mTOR signaling pathway
Isolated focal cortical dysplasia type IIb	Adenocarcinoma, Tubular	mTOR signaling pathway
Isolated focal cortical dysplasia type IIb	Congenital chromosomal disease	mTOR signaling pathway
Isolated focal cortical dysplasia type IIb	Carcinoma breast stage IV	mTOR signaling pathway
Isolated focal cortical dysplasia type IIb	Adenocarcinoma Of Esophagus	mTOR signaling pathway
Isolated focal cortical dysplasia type IIb	Large cell carcinoma of lung	mTOR signaling pathway
Isolated focal cortical dysplasia type IIb	Pre B-cell acute lymphoblastic leukemia	Acute myeloid leukemia
Isolated focal cortical dysplasia type IIb	Colorectal Carcinoma	mTOR signaling pathway
Isolated focal cortical dysplasia type IIb	Hereditary hemochromatosis	mTOR signaling pathway
Isolated focal cortical dysplasia type IIb	Refractory cancer	mTOR signaling pathway
Isolated focal cortical dysplasia type IIb	Colorectal Neoplasms	mTOR signaling pathway
Isolated focal cortical dysplasia type IIb	Hepatitis B	mTOR signaling pathway
Isolated focal cortical dysplasia type IIb	Philadelphia chromosome-positive acute lymphoblastic leukemia	mTOR signaling pathway
Isolated focal cortical dysplasia type IIb	Promyelocytic leukemia	mTOR signaling pathway
Isolated focal cortical dysplasia type IIb	Triple Negative Breast Neoplasms	mTOR signaling pathway
Isolated focal cortical dysplasia type IIb	leukemia	mTOR signaling pathway
Isolated focal cortical dysplasia type IIb	Acute lymphocytic leukemia	mTOR signaling pathway
Isolated focal cortical dysplasia type IIb	Pancreatic Ductal Adenocarcinoma	mTOR signaling pathway
Isolated focal cortical dysplasia type IIb	Carcinoma, Transitional Cell	mTOR signaling pathway
Isolated focal cortical dysplasia type IIb	Acute Promyelocytic Leukemia	mTOR signaling pathway
Isolated focal cortical dysplasia type IIb	Cytomegalovirus Infections	mTOR signaling pathway
Isolated focal cortical dysplasia type IIb	Lymphoma	mTOR signaling pathway
Isolated focal cortical dysplasia type IIb	Multiple Endocrine Neoplasia Type 1	mTOR signaling pathway
Isolated focal cortical dysplasia type IIb	Malignant neoplasm of stomach	mTOR signaling pathway
Isolated focal cortical dysplasia type IIb	Angiomyolipoma	mTOR signaling pathway
Isolated focal cortical dysplasia type IIb	Neuroendocrine Tumors	mTOR signaling pathway
Isolated focal cortical dysplasia type IIb	Neoplasms	mTOR signaling pathway
Isolated focal cortical dysplasia type IIb	Neuroblastoma	mTOR signaling pathway
Isolated focal cortical dysplasia type IIb	Adenomatous Polyposis Coli	mTOR signaling pathway
Isolated focal cortical dysplasia type IIb	polyps	mTOR signaling pathway
Isolated focal cortical dysplasia type IIb	Medulloblastoma	mTOR signaling pathway
Isolated focal cortical dysplasia type IIb	Tumor Angiogenesis	mTOR signaling pathway
Isolated focal cortical dysplasia type IIb	Pain	mTOR signaling pathway
Isolated focal cortical dysplasia type IIb	Adrenal Cortical Adenoma	mTOR signaling pathway
Isolated focal cortical dysplasia type IIb	Follicular thyroid carcinoma	mTOR signaling pathway
Microform holoprosencephaly	Adenocarcinoma	Basal cell carcinoma
Microform holoprosencephaly	Congenital defects	Hedgehog signaling pathway
Microform holoprosencephaly	Pancreatic carcinoma	Hedgehog signaling pathway
Microform holoprosencephaly	Malignant neoplasm of pancreas	Hedgehog signaling pathway
Microform holoprosencephaly	Carcinogenesis	Hedgehog signaling pathway
Microform holoprosencephaly	Stomach Carcinoma	Hedgehog signaling pathway
Microform holoprosencephaly	Carcinoma of bladder	Hedgehog signaling pathway
Microform holoprosencephaly	Lobar Holoprosencephaly	Hedgehog signaling pathway
Microform holoprosencephaly	Alobar Holoprosencephaly	Hedgehog signaling pathway
Microform holoprosencephaly	Semilobar Holoprosencephaly	Hedgehog signaling pathway
Microform holoprosencephaly	Central neuroblastoma	Hedgehog signaling pathway
Microform holoprosencephaly	Fibroid Tumor	Hedgehog signaling pathway
Microform holoprosencephaly	Metastatic Neoplasm	Hedgehog signaling pathway
Microform holoprosencephaly	Mammary Neoplasms	Hedgehog signaling pathway
Microform holoprosencephaly	Colorectal Cancer	Hedgehog signaling pathway
Microform holoprosencephaly	androgen independent prostate cancer	Basal cell carcinoma
Microform holoprosencephaly	Brain Neoplasms	Hedgehog signaling pathway
Microform holoprosencephaly	Malignant neoplasm of thyroid	Basal cell carcinoma
Microform holoprosencephaly	Non-Small Cell Lung Carcinoma	Basal cell carcinoma
Microform holoprosencephaly	Cleft upper lip	Hedgehog signaling pathway
Microform holoprosencephaly	Craniofacial Abnormalities	Hedgehog signaling pathway
Microform holoprosencephaly	Glioma	Basal cell carcinoma
Microform holoprosencephaly	Secondary malignant neoplasm of lymph node	Basal cell carcinoma
Microform holoprosencephaly	Chondrosarcoma	Hedgehog signaling pathway
Microform holoprosencephaly	Neural Tube Defects	Hedgehog signaling pathway
Microform holoprosencephaly	Osteopenia	Hedgehog signaling pathway
Microform holoprosencephaly	Ovarian Carcinoma	Basal cell carcinoma
Microform holoprosencephaly	Liver neoplasms	Basal cell carcinoma
Microform holoprosencephaly	Pancreatic Neoplasm	Hedgehog signaling pathway
Microform holoprosencephaly	Parkinson Disease	Hedgehog signaling pathway
Microform holoprosencephaly	Stomach Neoplasms	Hedgehog signaling pathway
Microform holoprosencephaly	Thyroid Neoplasm	Basal cell carcinoma
Microform holoprosencephaly	Glioblastoma	Basal cell carcinoma
Microform holoprosencephaly	Malignant lymphoma, lymphocytic, intermediate differentiation, diffuse	Hedgehog signaling pathway
Microform holoprosencephaly	Cyst	Hedgehog signaling pathway
Microform holoprosencephaly	Tumor Progression	Hedgehog signaling pathway
Microform holoprosencephaly	Medullary carcinoma of thyroid	Hedgehog signaling pathway
Microform holoprosencephaly	Hypospadias	Hedgehog signaling pathway
Microform holoprosencephaly	Skin Neoplasms	Hedgehog signaling pathway
Microform holoprosencephaly	Neoplasm Metastasis	Hedgehog signaling pathway
Microform holoprosencephaly	Malignant mesothelioma	Hedgehog signaling pathway
Microform holoprosencephaly	Experimental Organism Basal Cell Carcinoma	Hedgehog signaling pathway
Microform holoprosencephaly	Malignant neoplasm of skin	Hedgehog signaling pathway
Microform holoprosencephaly	Hypogonadism, Isolated Hypogonadotropic	Pathways in cancer
Microform holoprosencephaly	Malignant neoplasm of ovary	Basal cell carcinoma
Microform holoprosencephaly	Embryonal Carcinoma	Hedgehog signaling pathway
Microform holoprosencephaly	Midface retrusion	Hedgehog signaling pathway
Microform holoprosencephaly	Small midface	Hedgehog signaling pathway
Microform holoprosencephaly	Hypotrophic midface	Hedgehog signaling pathway
Microform holoprosencephaly	Decreased projection of midface	Hedgehog signaling pathway
Microform holoprosencephaly	Prostatic Neoplasms	Hedgehog signaling pathway
Microform holoprosencephaly	Malar flattening	Hedgehog signaling pathway
Microform holoprosencephaly	Hypotrophic malar bone	Hedgehog signaling pathway
Microform holoprosencephaly	Macrotia	Hedgehog signaling pathway
Microform holoprosencephaly	Large pinnae	Hedgehog signaling pathway
Microform holoprosencephaly	Pancreatitis, Chronic	Hedgehog signaling pathway
Microform holoprosencephaly	ovarian neoplasm	Basal cell carcinoma
Microform holoprosencephaly	Ameloblastoma	Hedgehog signaling pathway
Microform holoprosencephaly	Idiopathic hypogonadotropic hypogonadism	Hedgehog signaling pathway
Microform holoprosencephaly	Penile hypospadias	Hedgehog signaling pathway
Microform holoprosencephaly	Rhabdomyosarcoma	Hedgehog signaling pathway
Microform holoprosencephaly	Secondary malignant neoplasm of bone	Hedgehog signaling pathway
Microform holoprosencephaly	Xeroderma Pigmentosum	Hedgehog signaling pathway
Microform holoprosencephaly	Anaplastic thyroid carcinoma	Hedgehog signaling pathway
Microform holoprosencephaly	Skin carcinoma	Basal cell carcinoma
Microform holoprosencephaly	Cognitive delay	Hedgehog signaling pathway
Microform holoprosencephaly	Basal Cell Nevus Syndrome	Hedgehog signaling pathway
Microform holoprosencephaly	Oculo-dento-digital syndrome	Hedgehog signaling pathway
Microform holoprosencephaly	Intellectual Disability	Hedgehog signaling pathway
Microform holoprosencephaly	Decreased size of eyeball	Hedgehog signaling pathway
Microform holoprosencephaly	Abnormally small eyeball	Hedgehog signaling pathway
Microform holoprosencephaly	Mental and motor retardation	Hedgehog signaling pathway
Microform holoprosencephaly	Childhood Medulloblastoma	Hedgehog signaling pathway
Microform holoprosencephaly	Ulnar polydactyly of fingers	Hedgehog signaling pathway
Microform holoprosencephaly	Odontogenic Tumors	Hedgehog signaling pathway
Microform holoprosencephaly	Adult Medulloblastoma	Hedgehog signaling pathway
Microform holoprosencephaly	Desmoplastic Medulloblastoma	Hedgehog signaling pathway
Microform holoprosencephaly	Malignant neoplasm of prostate	Hedgehog signaling pathway
Microform holoprosencephaly	Hypopituitarism	Hedgehog signaling pathway
Microform holoprosencephaly	Mental Retardation	Basal cell carcinoma
Microform holoprosencephaly	Prostate carcinoma	Hedgehog signaling pathway
Microform holoprosencephaly	Breast Carcinoma	Hedgehog signaling pathway
Microform holoprosencephaly	Malignant neoplasm of brain	Basal cell carcinoma
Microform holoprosencephaly	Chronic graft-versus-host disease	Hedgehog signaling pathway
Microform holoprosencephaly	Malignant tumor of colon	Hedgehog signaling pathway
Microform holoprosencephaly	Jaw Keratocyst	Hedgehog signaling pathway
Microform holoprosencephaly	Keratocystic Odontogenic Tumor	Hedgehog signaling pathway
Microform holoprosencephaly	Liver carcinoma	Basal cell carcinoma
Microform holoprosencephaly	Colonic Neoplasms	Hedgehog signaling pathway
Microform holoprosencephaly	Congenital Abnormality	Hedgehog signaling pathway
Microform holoprosencephaly	Desmoplastic	Hedgehog signaling pathway
Microform holoprosencephaly	Adenoma	Hedgehog signaling pathway
Microform holoprosencephaly	Uranostaphyloschisis	Hedgehog signaling pathway
Microform holoprosencephaly	Malignant neoplasm of urinary bladder	Hedgehog signaling pathway
Microform holoprosencephaly	Bladder Neoplasm	Hedgehog signaling pathway
Microform holoprosencephaly	Malignant Neoplasms	Basal cell carcinoma
Microform holoprosencephaly	Squamous cell carcinoma	Hedgehog signaling pathway
Microform holoprosencephaly	Gastrointestinal Stromal Sarcoma	Hedgehog signaling pathway
Microform holoprosencephaly	Congenital chromosomal disease	Hedgehog signaling pathway
Microform holoprosencephaly	Colorectal Carcinoma	Hedgehog signaling pathway
Microform holoprosencephaly	Hereditary hemochromatosis	Hedgehog signaling pathway
Microform holoprosencephaly	Colorectal Neoplasms	Basal cell carcinoma
Microform holoprosencephaly	Pancreatic Ductal Adenocarcinoma	Hedgehog signaling pathway
Microform holoprosencephaly	Malignant neoplasm of stomach	Hedgehog signaling pathway
Microform holoprosencephaly	Neuroblastoma	Hedgehog signaling pathway
Microform holoprosencephaly	Infection caused by Helicobacter pylori	Basal cell carcinoma
Microform holoprosencephaly	Adenomatous Polyposis Coli	Hedgehog signaling pathway
Microform holoprosencephaly	Medulloblastoma	Hedgehog signaling pathway
Microform holoprosencephaly	Panhypopituitarism	Hedgehog signaling pathway
Microform holoprosencephaly	Neuroectodermal Tumor, Primitive	Hedgehog signaling pathway
Septopreoptic holoprosencephaly	Congenital defects	Hedgehog signaling pathway
Septopreoptic holoprosencephaly	Pancreatic carcinoma	Hedgehog signaling pathway
Septopreoptic holoprosencephaly	Malignant neoplasm of pancreas	Hedgehog signaling pathway
Septopreoptic holoprosencephaly	Carcinogenesis	Hedgehog signaling pathway
Septopreoptic holoprosencephaly	Stomach Carcinoma	Hedgehog signaling pathway
Septopreoptic holoprosencephaly	Carcinoma of bladder	Hedgehog signaling pathway
Septopreoptic holoprosencephaly	Lobar Holoprosencephaly	Hedgehog signaling pathway
Septopreoptic holoprosencephaly	Alobar Holoprosencephaly	Hedgehog signaling pathway
Septopreoptic holoprosencephaly	Semilobar Holoprosencephaly	Hedgehog signaling pathway
Septopreoptic holoprosencephaly	Central neuroblastoma	Hedgehog signaling pathway
Septopreoptic holoprosencephaly	Fibroid Tumor	Hedgehog signaling pathway
Septopreoptic holoprosencephaly	Metastatic Neoplasm	Hedgehog signaling pathway
Septopreoptic holoprosencephaly	Mammary Neoplasms	Hedgehog signaling pathway
Septopreoptic holoprosencephaly	Colorectal Cancer	Hedgehog signaling pathway
Septopreoptic holoprosencephaly	Brain Neoplasms	Hedgehog signaling pathway
Septopreoptic holoprosencephaly	Non-Small Cell Lung Carcinoma	Basal cell carcinoma
Septopreoptic holoprosencephaly	Cleft upper lip	Hedgehog signaling pathway
Septopreoptic holoprosencephaly	Craniofacial Abnormalities	Hedgehog signaling pathway
Septopreoptic holoprosencephaly	Glioma	Basal cell carcinoma
Septopreoptic holoprosencephaly	Neural Tube Defects	Hedgehog signaling pathway
Septopreoptic holoprosencephaly	Ovarian Carcinoma	Basal cell carcinoma
Septopreoptic holoprosencephaly	Pancreatic Neoplasm	Hedgehog signaling pathway
Septopreoptic holoprosencephaly	Parkinson Disease	Hedgehog signaling pathway
Septopreoptic holoprosencephaly	Stomach Neoplasms	Hedgehog signaling pathway
Septopreoptic holoprosencephaly	Glioblastoma	Basal cell carcinoma
Septopreoptic holoprosencephaly	Malignant lymphoma, lymphocytic, intermediate differentiation, diffuse	Hedgehog signaling pathway
Septopreoptic holoprosencephaly	Cyst	Hedgehog signaling pathway
Septopreoptic holoprosencephaly	Tumor Progression	Hedgehog signaling pathway
Septopreoptic holoprosencephaly	Medullary carcinoma of thyroid	Hedgehog signaling pathway
Septopreoptic holoprosencephaly	Hypospadias	Hedgehog signaling pathway
Septopreoptic holoprosencephaly	Skin Neoplasms	Hedgehog signaling pathway
Septopreoptic holoprosencephaly	Neoplasm Metastasis	Hedgehog signaling pathway
Septopreoptic holoprosencephaly	Experimental Organism Basal Cell Carcinoma	Hedgehog signaling pathway
Septopreoptic holoprosencephaly	Malignant neoplasm of skin	Hedgehog signaling pathway
Septopreoptic holoprosencephaly	Malignant neoplasm of ovary	Basal cell carcinoma
Septopreoptic holoprosencephaly	Midface retrusion	Hedgehog signaling pathway
Septopreoptic holoprosencephaly	Small midface	Hedgehog signaling pathway
Septopreoptic holoprosencephaly	Hypotrophic midface	Hedgehog signaling pathway
Septopreoptic holoprosencephaly	Decreased projection of midface	Hedgehog signaling pathway
Septopreoptic holoprosencephaly	Prostatic Neoplasms	Hedgehog signaling pathway
Septopreoptic holoprosencephaly	Malar flattening	Hedgehog signaling pathway
Septopreoptic holoprosencephaly	Hypotrophic malar bone	Hedgehog signaling pathway
Septopreoptic holoprosencephaly	Pancreatitis, Chronic	Hedgehog signaling pathway
Septopreoptic holoprosencephaly	Ameloblastoma	Hedgehog signaling pathway
Septopreoptic holoprosencephaly	Penile hypospadias	Hedgehog signaling pathway
Septopreoptic holoprosencephaly	Rhabdomyosarcoma	Hedgehog signaling pathway
Septopreoptic holoprosencephaly	Secondary malignant neoplasm of bone	Hedgehog signaling pathway
Septopreoptic holoprosencephaly	Xeroderma Pigmentosum	Hedgehog signaling pathway
Septopreoptic holoprosencephaly	Basal Cell Nevus Syndrome	Hedgehog signaling pathway
Septopreoptic holoprosencephaly	Oculo-dento-digital syndrome	Hedgehog signaling pathway
Septopreoptic holoprosencephaly	Intellectual Disability	Hedgehog signaling pathway
Septopreoptic holoprosencephaly	Decreased size of eyeball	Hedgehog signaling pathway
Septopreoptic holoprosencephaly	Abnormally small eyeball	Hedgehog signaling pathway
Septopreoptic holoprosencephaly	Childhood Medulloblastoma	Hedgehog signaling pathway
Septopreoptic holoprosencephaly	Ulnar polydactyly of fingers	Hedgehog signaling pathway
Septopreoptic holoprosencephaly	Odontogenic Tumors	Hedgehog signaling pathway
Septopreoptic holoprosencephaly	Adult Medulloblastoma	Hedgehog signaling pathway
Septopreoptic holoprosencephaly	Desmoplastic Medulloblastoma	Hedgehog signaling pathway
Septopreoptic holoprosencephaly	Malignant neoplasm of prostate	Hedgehog signaling pathway
Septopreoptic holoprosencephaly	Prostate carcinoma	Hedgehog signaling pathway
Septopreoptic holoprosencephaly	Breast Carcinoma	Hedgehog signaling pathway
Septopreoptic holoprosencephaly	Chronic graft-versus-host disease	Hedgehog signaling pathway
Septopreoptic holoprosencephaly	Malignant tumor of colon	Hedgehog signaling pathway
Septopreoptic holoprosencephaly	Keratocystic Odontogenic Tumor	Hedgehog signaling pathway
Septopreoptic holoprosencephaly	Liver carcinoma	Basal cell carcinoma
Septopreoptic holoprosencephaly	Colonic Neoplasms	Hedgehog signaling pathway
Septopreoptic holoprosencephaly	Congenital Abnormality	Hedgehog signaling pathway
Septopreoptic holoprosencephaly	Desmoplastic	Hedgehog signaling pathway
Septopreoptic holoprosencephaly	Adenoma	Hedgehog signaling pathway
Septopreoptic holoprosencephaly	Uranostaphyloschisis	Hedgehog signaling pathway
Septopreoptic holoprosencephaly	Malignant neoplasm of urinary bladder	Hedgehog signaling pathway
Septopreoptic holoprosencephaly	Bladder Neoplasm	Hedgehog signaling pathway
Septopreoptic holoprosencephaly	Squamous cell carcinoma	Hedgehog signaling pathway
Septopreoptic holoprosencephaly	Congenital chromosomal disease	Hedgehog signaling pathway
Septopreoptic holoprosencephaly	Colorectal Carcinoma	Hedgehog signaling pathway
Septopreoptic holoprosencephaly	Hereditary hemochromatosis	Hedgehog signaling pathway
Septopreoptic holoprosencephaly	Pancreatic Ductal Adenocarcinoma	Hedgehog signaling pathway
Septopreoptic holoprosencephaly	Malignant neoplasm of stomach	Hedgehog signaling pathway
Septopreoptic holoprosencephaly	Neuroblastoma	Hedgehog signaling pathway
Septopreoptic holoprosencephaly	Infection caused by Helicobacter pylori	Basal cell carcinoma
Septopreoptic holoprosencephaly	Adenomatous Polyposis Coli	Hedgehog signaling pathway
Septopreoptic holoprosencephaly	Medulloblastoma	Hedgehog signaling pathway
Septopreoptic holoprosencephaly	Panhypopituitarism	Hedgehog signaling pathway
Septopreoptic holoprosencephaly	Neuroectodermal Tumor, Primitive	Hedgehog signaling pathway
Mitochondrial trifunctional protein deficiency	Trifunctional Protein Deficiency With Myopathy And Neuropathy	Fatty acid elongation
Mitochondrial trifunctional protein deficiency	Cognitive delay	Fatty acid elongation
Mitochondrial trifunctional protein deficiency	Mental and motor retardation	Fatty acid elongation
Immunodeficiency by defective expression of MHC class II	Colitis	Primary immunodeficiency
Immunodeficiency by defective expression of MHC class II	Recurrent viral infection	Primary immunodeficiency
Immunodeficiency by defective expression of MHC class II	Increased susceptibility to bacterial infections	Primary immunodeficiency
Immunodeficiency by defective expression of MHC class II	Prone to bacterial infection	Primary immunodeficiency
Immunodeficiency by defective expression of MHC class II	Encephalitis	Primary immunodeficiency
Immunodeficiency by defective expression of MHC class II	Neutrophil count decreased	Primary immunodeficiency
Immunodeficiency by defective expression of MHC class II	Agammaglobulinemia	Primary immunodeficiency
Herpes simplex virus encephalitis	Squamous cell carcinoma of the head and neck	Toll-like receptor signaling pathway
Herpes simplex virus encephalitis	Virus Diseases	Toll-like receptor signaling pathway
Herpes simplex virus encephalitis	B-Cell Lymphomas	Toll-like receptor signaling pathway
Herpes simplex virus encephalitis	Diffuse Large B-Cell Lymphoma	Toll-like receptor signaling pathway
Herpes simplex virus encephalitis	Multiple Sclerosis	Toll-like receptor signaling pathway
Herpes simplex virus encephalitis	Kaposi Sarcoma	Toll-like receptor signaling pathway
Herpes simplex virus encephalitis	Congestive heart failure	Toll-like receptor signaling pathway
Herpes simplex virus encephalitis	Herpes Simplex Infections	Toll-like receptor signaling pathway
Herpes simplex virus encephalitis	Influenza	Toll-like receptor signaling pathway
Herpes simplex virus encephalitis	Ectodermal Dysplasia	Toll-like receptor signaling pathway
Herpes simplex virus encephalitis	Nasopharyngeal carcinoma	Toll-like receptor signaling pathway
Herpes simplex virus encephalitis	Liver carcinoma	Toll-like receptor signaling pathway
Herpes simplex virus encephalitis	Squamous cell carcinoma	Toll-like receptor signaling pathway
Herpes simplex virus encephalitis	Primary infection NOS	Toll-like receptor signaling pathway
Herpes simplex virus encephalitis	leukemia	Toll-like receptor signaling pathway
Herpes simplex virus encephalitis	Lymphoma	Toll-like receptor signaling pathway
Herpes simplex virus encephalitis	Herpes encephalitis	Toll-like receptor signaling pathway
Kallmann syndrome	Mental Depression	Melanoma
Kallmann syndrome	Absence of secondary sex characteristics	Melanoma
Kallmann syndrome	Eunuchoid habitus	Melanoma
Kallmann syndrome	Depressive disorder	Melanoma
Kallmann syndrome	Cartilage-hair hypoplasia	Melanoma
Kallmann syndrome	Increased female libido	Melanoma
Kallmann syndrome	Hypothalamic gonadotropin-releasing hormone deficiency	Melanoma
Kallmann syndrome	Anterior hypopituitarism	Melanoma
Kallmann syndrome	Abnormality of body height	Melanoma
Kallmann syndrome	Teratocarcinoma	Melanoma
Kallmann syndrome	Carcinogenesis	Melanoma
Kallmann syndrome	Central neuroblastoma	Melanoma
Kallmann syndrome	Mammary Neoplasms	Melanoma
Kallmann syndrome	Colorectal Cancer	Melanoma
Kallmann syndrome	androgen independent prostate cancer	Melanoma
Kallmann syndrome	Bicuspid aortic valve	Melanoma
Kallmann syndrome	Cleft upper lip	Melanoma
Kallmann syndrome	Craniofacial Abnormalities	Melanoma
Kallmann syndrome	Osteoporosis	Melanoma
Kallmann syndrome	Osteopenia	Melanoma
Kallmann syndrome	Ovarian Carcinoma	Melanoma
Kallmann syndrome	Parkinson Disease	Melanoma
Kallmann syndrome	Neoplasm Metastasis	Melanoma
Kallmann syndrome	Invasive Carcinoma	Melanoma
Kallmann syndrome	Hormone refractory prostate cancer	Melanoma
Kallmann syndrome	Prostatic Hypertrophy	Melanoma
Kallmann syndrome	Hypogonadism, Isolated Hypogonadotropic	Melanoma
Kallmann syndrome	Malignant neoplasm of ovary	Melanoma
Kallmann syndrome	Embryonal Carcinoma	Melanoma
Kallmann syndrome	Prostatic Neoplasms	Melanoma
Kallmann syndrome	Cardiovascular Abnormalities	Melanoma
Kallmann syndrome	Intraepithelial Neoplasia	Melanoma
Kallmann syndrome	ovarian neoplasm	Melanoma
Kallmann syndrome	Gynecomastia	Melanoma
Kallmann syndrome	Idiopathic hypogonadotropic hypogonadism	Melanoma
Kallmann syndrome	Absence of pubertal development	Melanoma
Kallmann syndrome	synovial sarcoma	Melanoma
Kallmann syndrome	DiGeorge Syndrome	MAPK signaling pathway
Kallmann syndrome	Ganglioneuroblastoma	Melanoma
Kallmann syndrome	Female hypogonadism syndrome	Melanoma
Kallmann syndrome	Malignant neoplasm of prostate	Melanoma
Kallmann syndrome	Anosmia	Melanoma
Kallmann syndrome	Bipolar Disorder	Melanoma
Kallmann syndrome	Prostate carcinoma	Melanoma
Kallmann syndrome	Decreased fertility	Melanoma
Kallmann syndrome	Non-obstructive azoospermia	Melanoma
Kallmann syndrome	Erectile abnormalities	Melanoma
Kallmann syndrome	Breast Carcinoma	Melanoma
Kallmann syndrome	Reduced bone mineral density	Melanoma
Kallmann syndrome	Congenital hypoplasia of ovary	Melanoma
Kallmann syndrome	Hypoplastic ovary	Melanoma
Kallmann syndrome	Liver carcinoma	Melanoma
Kallmann syndrome	Prostatic Hyperplasia	Melanoma
Kallmann syndrome	Infantile uterus	Melanoma
Kallmann syndrome	Secondary physiologic amenorrhea	Melanoma
Kallmann syndrome	Congenital Abnormality	Melanoma
Kallmann syndrome	Wide spaced nipples	Melanoma
Kallmann syndrome	Colorectal Carcinoma	Melanoma
Kallmann syndrome	Choriocarcinoma	Melanoma
Kallmann syndrome	Neuroblastoma	Melanoma
Kallmann syndrome	Anxiety	Melanoma
Systemic lupus erythematosus	Adenocarcinoma	Leishmaniasis
Systemic lupus erythematosus	Down Syndrome	Leishmaniasis
Systemic lupus erythematosus	Mental Depression	Leishmaniasis
Systemic lupus erythematosus	T-Cell Lymphoma	Leishmaniasis
Systemic lupus erythematosus	Pancreatitis, Acute Necrotizing	Staphylococcus aureus infection
Systemic lupus erythematosus	Lobomycosis	Leishmaniasis
Systemic lupus erythematosus	Latent autoimmune diabetes mellitus in adult	Staphylococcus aureus infection
Systemic lupus erythematosus	Vasculitis, Leukocytoclastic, Cutaneous	Staphylococcus aureus infection
Systemic lupus erythematosus	Acute otitis media	Staphylococcus aureus infection
Systemic lupus erythematosus	Leukocytoclastic vasculitis	Staphylococcus aureus infection
Systemic lupus erythematosus	Liver and Intrahepatic Biliary Tract Carcinoma	Leishmaniasis
Systemic lupus erythematosus	Colonic Diseases	Staphylococcus aureus infection
Systemic lupus erythematosus	Malignant neoplasm of mouth	Leishmaniasis
Systemic lupus erythematosus	Cholangiocarcinoma	Leishmaniasis
Systemic lupus erythematosus	Sudden infant death syndrome	Leishmaniasis
Systemic lupus erythematosus	Necrotizing Enterocolitis	Staphylococcus aureus infection
Systemic lupus erythematosus	Lip and Oral Cavity Carcinoma	Leishmaniasis
Systemic lupus erythematosus	Anaphylaxis (non medication)	Staphylococcus aureus infection
Systemic lupus erythematosus	Q Fever	Leishmaniasis
Systemic lupus erythematosus	Chronic Q Fever	Leishmaniasis
Systemic lupus erythematosus	Pancreatic carcinoma	Leishmaniasis
Systemic lupus erythematosus	Anoxia	Leishmaniasis
Systemic lupus erythematosus	Cardiac Arrest	Staphylococcus aureus infection
Systemic lupus erythematosus	Septicemia	Staphylococcus aureus infection
Systemic lupus erythematosus	Aortic Aneurysm, Thoracic	Leishmaniasis
Systemic lupus erythematosus	Sepsis	Staphylococcus aureus infection
Systemic lupus erythematosus	Depressive disorder	Leishmaniasis
Systemic lupus erythematosus	Asthma, Occupational	Staphylococcus aureus infection
Systemic lupus erythematosus	Gastric Adenocarcinoma	Leishmaniasis
Systemic lupus erythematosus	Chronic Kidney Diseases	Staphylococcus aureus infection
Systemic lupus erythematosus	Chromosome 11p11.2 Deletion Syndrome	Staphylococcus aureus infection
Systemic lupus erythematosus	Narcolepsy	Staphylococcus aureus infection
Systemic lupus erythematosus	Panic Disorder	Staphylococcus aureus infection
Systemic lupus erythematosus	Staphylococcal toxic shock syndrome	Staphylococcus aureus infection
Systemic lupus erythematosus	PANIC DISORDER 1	Staphylococcus aureus infection
Systemic lupus erythematosus	Injuries, Acute Brain	Leishmaniasis
Systemic lupus erythematosus	Lesion of brain	Leishmaniasis
Systemic lupus erythematosus	Brain Injuries	Leishmaniasis
Systemic lupus erythematosus	Brain Lacerations	Leishmaniasis
Systemic lupus erythematosus	Brain Injuries, Focal	Leishmaniasis
Systemic lupus erythematosus	Lambert-Eaton Myasthenic Syndrome	Leishmaniasis
Systemic lupus erythematosus	Adenocarcinoma of colon	Leishmaniasis
Systemic lupus erythematosus	Myasthenia Gravis	Staphylococcus aureus infection
Systemic lupus erythematosus	Schwartz-Jampel Syndrome	Staphylococcus aureus infection
Systemic lupus erythematosus	Malignant neoplasm of pancreas	Leishmaniasis
Systemic lupus erythematosus	Malignant neoplasm of esophagus	Leishmaniasis
Systemic lupus erythematosus	Neurologic Symptoms	Hematopoietic cell lineage
Systemic lupus erythematosus	Carcinogenesis	Leishmaniasis
Systemic lupus erythematosus	Rhinosinusitis	Staphylococcus aureus infection
Systemic lupus erythematosus	Adnexal Diseases	Staphylococcus aureus infection
Systemic lupus erythematosus	Leukemogenesis	Leishmaniasis
Systemic lupus erythematosus	Carcinoma of lung	Leishmaniasis
Systemic lupus erythematosus	Hepatitis C Virus Infection	Staphylococcus aureus infection
Systemic lupus erythematosus	Collagenous Sprue	Staphylococcus aureus infection
Systemic lupus erythematosus	Aplastic anemia, idiopathic	Staphylococcus aureus infection
Systemic lupus erythematosus	Lupus Vasculitis, Central Nervous System	Staphylococcus aureus infection
Systemic lupus erythematosus	Lupus Meningoencephalitis	Staphylococcus aureus infection
Systemic lupus erythematosus	Neuropsychiatric Systemic Lupus Erythematosus	Staphylococcus aureus infection
Systemic lupus erythematosus	Diabetes	Staphylococcus aureus infection
Systemic lupus erythematosus	Stomach Carcinoma	Leishmaniasis
Systemic lupus erythematosus	Inflammatory disorder	Staphylococcus aureus infection
Systemic lupus erythematosus	Leprosy, Paucibacillary	Staphylococcus aureus infection
Systemic lupus erythematosus	Cirrhosis	Staphylococcus aureus infection
Systemic lupus erythematosus	Carcinoma of bladder	Leishmaniasis
Systemic lupus erythematosus	Hemochromatosis	Leishmaniasis
Systemic lupus erythematosus	Toxoplasmosis	Staphylococcus aureus infection
Systemic lupus erythematosus	Central neuroblastoma	Leishmaniasis
Systemic lupus erythematosus	Arthritis	Staphylococcus aureus infection
Systemic lupus erythematosus	Fibromyalgia	Leishmaniasis
Systemic lupus erythematosus	Lupus Vulgaris	Staphylococcus aureus infection
Systemic lupus erythematosus	Lupus Erythematosus, Discoid	Staphylococcus aureus infection
Systemic lupus erythematosus	Lupus Erythematosus	Staphylococcus aureus infection
Systemic lupus erythematosus	early pregnancy	Staphylococcus aureus infection
Systemic lupus erythematosus	Job Syndrome	Leishmaniasis
Systemic lupus erythematosus	Mucocutaneous leishmaniasis	Leishmaniasis
Systemic lupus erythematosus	American cutaneous leishmaniasis	Leishmaniasis
Systemic lupus erythematosus	Malignant Squamous Cell Neoplasm	Leishmaniasis
Systemic lupus erythematosus	Polyp of large intestine	Leishmaniasis
Systemic lupus erythematosus	Squamous cell carcinoma of the head and neck	Leishmaniasis
Systemic lupus erythematosus	Adenoma of large intestine	Leishmaniasis
Systemic lupus erythematosus	Colitis	Staphylococcus aureus infection
Systemic lupus erythematosus	Neuropathy, Painful	Leishmaniasis
Systemic lupus erythematosus	Chronic Lymphocytic Leukemia/Small Lymphocytic Lymphoma	Leishmaniasis
Systemic lupus erythematosus	Parasitic Diseases	Staphylococcus aureus infection
Systemic lupus erythematosus	Autoimmune thyroid disease	Staphylococcus aureus infection
Systemic lupus erythematosus	Autoimmune thyroiditis	Staphylococcus aureus infection
Systemic lupus erythematosus	Diabetes Mellitus	Staphylococcus aureus infection
Systemic lupus erythematosus	Primary malignant neoplasm of lung	Leishmaniasis
Systemic lupus erythematosus	Cooley's anemia	Leishmaniasis
Systemic lupus erythematosus	Gaucher Disease	Leishmaniasis
Systemic lupus erythematosus	Hairy Cell Leukemia	Staphylococcus aureus infection
Systemic lupus erythematosus	Leukemia, T-Cell	Staphylococcus aureus infection
Systemic lupus erythematosus	Reticulosarcoma	Staphylococcus aureus infection
Systemic lupus erythematosus	Hidradenitis Suppurativa	Leishmaniasis
Systemic lupus erythematosus	Small Fiber Neuropathy	Staphylococcus aureus infection
Systemic lupus erythematosus	Mammary Neoplasms	Leishmaniasis
Systemic lupus erythematosus	Purpura	Staphylococcus aureus infection
Systemic lupus erythematosus	Bacteroides fragilis infection in conditions classified elsewhere and of unspecified site	Leishmaniasis
Systemic lupus erythematosus	Colorectal Cancer	Leishmaniasis
Systemic lupus erythematosus	Hepatitis B, Chronic	Staphylococcus aureus infection
Systemic lupus erythematosus	Pancolitis	Staphylococcus aureus infection
Systemic lupus erythematosus	Granulomatosis with polyangiitis	Staphylococcus aureus infection
Systemic lupus erythematosus	Skin Erosion	Staphylococcus aureus infection
Systemic lupus erythematosus	Erythema Chronicum Migrans	Leishmaniasis
Systemic lupus erythematosus	Glossitis, Benign Migratory	Leishmaniasis
Systemic lupus erythematosus	prostatitis	Staphylococcus aureus infection
Systemic lupus erythematosus	Juvenile-Onset Still Disease	Leishmaniasis
Systemic lupus erythematosus	Cervical Intraepithelial Neoplasia	Leishmaniasis
Systemic lupus erythematosus	Human papilloma virus infection	Staphylococcus aureus infection
Systemic lupus erythematosus	Hyperalgesia, Thermal	Leishmaniasis
Systemic lupus erythematosus	Panuveitis	Staphylococcus aureus infection
Systemic lupus erythematosus	Severe Acute Respiratory Syndrome	Staphylococcus aureus infection
Systemic lupus erythematosus	Allergic disposition	Staphylococcus aureus infection
Systemic lupus erythematosus	Trachoma	Staphylococcus aureus infection
Systemic lupus erythematosus	Oligoarticular Arthritis	Staphylococcus aureus infection
Systemic lupus erythematosus	Hemorrhagic Fever with Renal Syndrome	Leishmaniasis
Systemic lupus erythematosus	Familial psoriasis	Staphylococcus aureus infection
Systemic lupus erythematosus	Infection of ear	Staphylococcus aureus infection
Systemic lupus erythematosus	Idiopathic achalasia of esophagus	Staphylococcus aureus infection
Systemic lupus erythematosus	Localized vitiligo	Staphylococcus aureus infection
Systemic lupus erythematosus	Pathological Dilatation	Staphylococcus aureus infection
Systemic lupus erythematosus	Tubular Aggregate Myopathy	Leishmaniasis
Systemic lupus erythematosus	Varicella Zoster Virus Infection	Staphylococcus aureus infection
Systemic lupus erythematosus	Recurrent respiratory papillomatosis	Staphylococcus aureus infection
Systemic lupus erythematosus	Folliculitis	Staphylococcus aureus infection
Systemic lupus erythematosus	Rheumatoid Nodule	Staphylococcus aureus infection
Systemic lupus erythematosus	Hepatolenticular Degeneration	Leishmaniasis
Systemic lupus erythematosus	Allergic sensitization	Staphylococcus aureus infection
Systemic lupus erythematosus	Acquired Immunodeficiency Syndrome	Staphylococcus aureus infection
Systemic lupus erythematosus	Anemia	Staphylococcus aureus infection
Systemic lupus erythematosus	Acute alcoholic liver disease	Leishmaniasis
Systemic lupus erythematosus	Boutonneuse Fever	Leishmaniasis
Systemic lupus erythematosus	Chorioretinitis	Staphylococcus aureus infection
Systemic lupus erythematosus	Schistosomiasis japonica	Staphylococcus aureus infection
Systemic lupus erythematosus	Viral respiratory infection	Leishmaniasis
Systemic lupus erythematosus	Congo hemorrhagic fever	Staphylococcus aureus infection
Systemic lupus erythematosus	Refractory anemias	Leishmaniasis
Systemic lupus erythematosus	Aneurysm	Leishmaniasis
Systemic lupus erythematosus	Cholangitis, Sclerosing	Staphylococcus aureus infection
Systemic lupus erythematosus	Behcet Syndrome	Staphylococcus aureus infection
Systemic lupus erythematosus	Hepatitis, Chronic	Staphylococcus aureus infection
Systemic lupus erythematosus	Burn injury	Leishmaniasis
Systemic lupus erythematosus	Ankylosing spondylitis	Staphylococcus aureus infection
Systemic lupus erythematosus	Meningitis, Cryptococcal	Staphylococcus aureus infection
Systemic lupus erythematosus	Brain Neoplasms	Leishmaniasis
Systemic lupus erythematosus	neurological disability	Staphylococcus aureus infection
Systemic lupus erythematosus	fertility disorders	Leishmaniasis
Systemic lupus erythematosus	Kimura Disease	Staphylococcus aureus infection
Systemic lupus erythematosus	Ear Inflammation	Staphylococcus aureus infection
Systemic lupus erythematosus	Cerebral arterial aneurysm	Leishmaniasis
Systemic lupus erythematosus	Moyamoya disease 1	Leishmaniasis
Systemic lupus erythematosus	Idiopathic pulmonary arterial hypertension	Leishmaniasis
Systemic lupus erythematosus	Malignant neoplasm of thyroid	Leishmaniasis
Systemic lupus erythematosus	Ataxia Telangiectasia	Leishmaniasis
Systemic lupus erythematosus	Barrett Esophagus	Leishmaniasis
Systemic lupus erythematosus	Non-Small Cell Lung Carcinoma	Leishmaniasis
Systemic lupus erythematosus	Renal Cell Carcinoma	Leishmaniasis
Systemic lupus erythematosus	Hyperthyroidism	Staphylococcus aureus infection
Systemic lupus erythematosus	Mammary Neoplasms, Experimental	T cell receptor signaling pathway
Systemic lupus erythematosus	Malignant tumor of cervix	Staphylococcus aureus infection
Systemic lupus erythematosus	Sarcoidosis	Staphylococcus aureus infection
Systemic lupus erythematosus	Undifferentiated carcinoma	Leishmaniasis
Systemic lupus erythematosus	Coronary Arteriosclerosis	Staphylococcus aureus infection
Systemic lupus erythematosus	Dystonia Disorders	Autoimmune thyroid disease
Systemic lupus erythematosus	Crohn Disease	Staphylococcus aureus infection
Systemic lupus erythematosus	Secondary malignant neoplasm of liver	Leishmaniasis
Systemic lupus erythematosus	Hepatitis C, Chronic	Staphylococcus aureus infection
Systemic lupus erythematosus	Infiltrating Cervical Carcinoma	Staphylococcus aureus infection
Systemic lupus erythematosus	Kidney Failure, Acute	Staphylococcus aureus infection
Systemic lupus erythematosus	Diabetic Nephropathy	Leishmaniasis
Systemic lupus erythematosus	Regurgitation	Leishmaniasis
Systemic lupus erythematosus	Drug Allergy	Staphylococcus aureus infection
Systemic lupus erythematosus	Endometriosis	Staphylococcus aureus infection
Systemic lupus erythematosus	Esophageal Neoplasms	Leishmaniasis
Systemic lupus erythematosus	Breast Fibrocystic Disease	Allograft rejection
Systemic lupus erythematosus	Gingival Diseases	Staphylococcus aureus infection
Systemic lupus erythematosus	Viremia	Leishmaniasis
Systemic lupus erythematosus	Immune Reconstitution Inflammatory Syndrome	Staphylococcus aureus infection
Systemic lupus erythematosus	Glioma	Leishmaniasis
Systemic lupus erythematosus	Fibrosis	Staphylococcus aureus infection
Systemic lupus erythematosus	Nausea and vomiting	Staphylococcus aureus infection
Systemic lupus erythematosus	Hepatitis	Staphylococcus aureus infection
Systemic lupus erythematosus	IGA Glomerulonephritis	Staphylococcus aureus infection
Systemic lupus erythematosus	Proteinuria	Staphylococcus aureus infection
Systemic lupus erythematosus	Hepatitis A	Leishmaniasis
Systemic lupus erythematosus	Congenital contractural arachnodactyly	Staphylococcus aureus infection
Systemic lupus erythematosus	Hepatitis, Toxic	Staphylococcus aureus infection
Systemic lupus erythematosus	Secondary malignant neoplasm of lymph node	Leishmaniasis
Systemic lupus erythematosus	HIV Infections	Staphylococcus aureus infection
Systemic lupus erythematosus	Huntington Disease	Leishmaniasis
Systemic lupus erythematosus	Caries (morphologic abnormality)	Staphylococcus aureus infection
Systemic lupus erythematosus	Inflammatory Bowel Diseases	Staphylococcus aureus infection
Systemic lupus erythematosus	Muscle damage	Staphylococcus aureus infection
Systemic lupus erythematosus	Childhood Acute Lymphoblastic Leukemia	Staphylococcus aureus infection
Systemic lupus erythematosus	Subcutaneous nodule	Leishmaniasis
Systemic lupus erythematosus	Malignant Glioma	Leishmaniasis
Systemic lupus erythematosus	Multiple, subcutaneous nodules	Leishmaniasis
Systemic lupus erythematosus	Myeloid Leukemia	Leishmaniasis
Systemic lupus erythematosus	Liver Cirrhosis, Experimental	Staphylococcus aureus infection
Systemic lupus erythematosus	Leukopenia	Staphylococcus aureus infection
Systemic lupus erythematosus	Liver Cirrhosis, Alcoholic	Leishmaniasis
Systemic lupus erythematosus	Endometriosis of uterus	Leishmaniasis
Systemic lupus erythematosus	Liver diseases	Staphylococcus aureus infection
Systemic lupus erythematosus	Cervical Squamous Intraepithelial Neoplasia	Leishmaniasis
Systemic lupus erythematosus	Premature Obstetric Labor	Leishmaniasis
Systemic lupus erythematosus	Mouth Neoplasms	Leishmaniasis
Systemic lupus erythematosus	Myopathy	Toxoplasmosis
Systemic lupus erythematosus	Neural Tube Defects	Autoimmune thyroid disease
Systemic lupus erythematosus	Dermatologic disorders	Staphylococcus aureus infection
Systemic lupus erythematosus	Ki-1+ Anaplastic Large Cell Lymphoma	Leishmaniasis
Systemic lupus erythematosus	Osteopenia	Leishmaniasis
Systemic lupus erythematosus	Ovarian Carcinoma	Leishmaniasis
Systemic lupus erythematosus	Intermittent migraine headaches	Leishmaniasis
Systemic lupus erythematosus	Liver neoplasms	Leishmaniasis
Systemic lupus erythematosus	Parkinson Disease	Staphylococcus aureus infection
Systemic lupus erythematosus	Periodontal Diseases	Staphylococcus aureus infection
Systemic lupus erythematosus	Hydatidiform Mole	Staphylococcus aureus infection
Systemic lupus erythematosus	Leishmaniasis	Leishmaniasis
Systemic lupus erythematosus	Lymphocytosis	Staphylococcus aureus infection
Systemic lupus erythematosus	Measles	Leishmaniasis
Systemic lupus erythematosus	Systemic Scleroderma	Staphylococcus aureus infection
Systemic lupus erythematosus	Post-kala-azar dermal leishmaniasis	Leishmaniasis
Systemic lupus erythematosus	Spinal Cord Diseases	Staphylococcus aureus infection
Systemic lupus erythematosus	Pleural Tuberculosis	Leishmaniasis
Systemic lupus erythematosus	Stomach Neoplasms	Leishmaniasis
Systemic lupus erythematosus	Uveitis	Staphylococcus aureus infection
Systemic lupus erythematosus	Immunoglobulin A deficiency (disorder)	Staphylococcus aureus infection
Systemic lupus erythematosus	Vesicular Stomatitis	Leishmaniasis
Systemic lupus erythematosus	Tuberculosis	Staphylococcus aureus infection
Systemic lupus erythematosus	pricking of skin	Staphylococcus aureus infection
Systemic lupus erythematosus	hiv-infection/aids	Staphylococcus aureus infection
Systemic lupus erythematosus	Tuberculosis, Pulmonary	Staphylococcus aureus infection
Systemic lupus erythematosus	Virus Diseases	Staphylococcus aureus infection
Systemic lupus erythematosus	Glioblastoma	Leishmaniasis
Systemic lupus erythematosus	Lung diseases	Staphylococcus aureus infection
Systemic lupus erythematosus	B-Cell Lymphomas	Leishmaniasis
Systemic lupus erythematosus	Inflammatory dermatosis	Staphylococcus aureus infection
Systemic lupus erythematosus	Diffuse Large B-Cell Lymphoma	Staphylococcus aureus infection
Systemic lupus erythematosus	Synovitis	Staphylococcus aureus infection
Systemic lupus erythematosus	Epstein-Barr Virus Infections	Staphylococcus aureus infection
Systemic lupus erythematosus	Secondary malignant neoplasm of lung	Staphylococcus aureus infection
Systemic lupus erythematosus	Restenosis	Staphylococcus aureus infection
Systemic lupus erythematosus	Malignant lymphoma, lymphocytic, intermediate differentiation, diffuse	Leishmaniasis
Systemic lupus erythematosus	Malignant neoplasm of kidney	Leishmaniasis
Systemic lupus erythematosus	Renal carcinoma	Leishmaniasis
Systemic lupus erythematosus	Severe Sepsis	Staphylococcus aureus infection
Systemic lupus erythematosus	Encephalopathies	Toll-like receptor signaling pathway
Systemic lupus erythematosus	Hepatitis D Infection	Leishmaniasis
Systemic lupus erythematosus	Complete atrioventricular block	Staphylococcus aureus infection
Systemic lupus erythematosus	Metastatic melanoma	Leishmaniasis
Systemic lupus erythematosus	Idiopathic Membranous Glomerulonephritis	Staphylococcus aureus infection
Systemic lupus erythematosus	Adenocarcinoma of lung (disorder)	Leishmaniasis
Systemic lupus erythematosus	Mental disorders	Autoimmune thyroid disease
Systemic lupus erythematosus	Other specified transient cerebral ischemias	Staphylococcus aureus infection
Systemic lupus erythematosus	Esophageal carcinoma	Leishmaniasis
Systemic lupus erythematosus	Lung Neoplasms	Leishmaniasis
Systemic lupus erythematosus	Common Variable Immunodeficiency	Staphylococcus aureus infection
Systemic lupus erythematosus	Allergic asthma	Staphylococcus aureus infection
Systemic lupus erythematosus	Cystitis	Leishmaniasis
Systemic lupus erythematosus	Dermatitis, Allergic Contact	Staphylococcus aureus infection
Systemic lupus erythematosus	Familial Ménière disease	Staphylococcus aureus infection
Systemic lupus erythematosus	Welts	Staphylococcus aureus infection
Systemic lupus erythematosus	Tumor Progression	Leishmaniasis
Systemic lupus erythematosus	Pseudohyperkalemia Cardiff	Staphylococcus aureus infection
Systemic lupus erythematosus	Carcinoma, Large Cell	Hematopoietic cell lineage
Systemic lupus erythematosus	Acute pancreatitis	Staphylococcus aureus infection
Systemic lupus erythematosus	Alcoholic Liver Diseases	Leishmaniasis
Systemic lupus erythematosus	Erythema	Staphylococcus aureus infection
Systemic lupus erythematosus	Polyneuropathy	Staphylococcus aureus infection
Systemic lupus erythematosus	Multiple Sclerosis	Staphylococcus aureus infection
Systemic lupus erythematosus	Chronic berylliosis	Staphylococcus aureus infection
Systemic lupus erythematosus	heavy drinking	Leishmaniasis
Systemic lupus erythematosus	Age related macular degeneration	Staphylococcus aureus infection
Systemic lupus erythematosus	Neutropenia	Staphylococcus aureus infection
Systemic lupus erythematosus	Chronic Periodontitis	Staphylococcus aureus infection
Systemic lupus erythematosus	Angina, Unstable	Staphylococcus aureus infection
Systemic lupus erythematosus	Encephalitis	Leishmaniasis
Systemic lupus erythematosus	Encephalitis, St. Louis	Staphylococcus aureus infection
Systemic lupus erythematosus	Malignant Head and Neck Neoplasm	Leishmaniasis
Systemic lupus erythematosus	Glomerulonephritis	Staphylococcus aureus infection
Systemic lupus erythematosus	Hyperalgesia	Leishmaniasis
Systemic lupus erythematosus	Lupus Nephritis	Staphylococcus aureus infection
Systemic lupus erythematosus	Mucocutaneous Lymph Node Syndrome	Staphylococcus aureus infection
Systemic lupus erythematosus	Myositis	Staphylococcus aureus infection
Systemic lupus erythematosus	Pyemia	Leishmaniasis
Systemic lupus erythematosus	Squamous cell carcinoma of esophagus	Leishmaniasis
Systemic lupus erythematosus	Reperfusion Injury	Leishmaniasis
Systemic lupus erythematosus	Septic Shock	Staphylococcus aureus infection
Systemic lupus erythematosus	Proliferative diabetic retinopathy	Staphylococcus aureus infection
Systemic lupus erythematosus	Systemic Inflammatory Response Syndrome	Staphylococcus aureus infection
Systemic lupus erythematosus	Carcinoma, Lewis Lung	Leishmaniasis
Systemic lupus erythematosus	Stable angina	Staphylococcus aureus infection
Systemic lupus erythematosus	Neoplasm Metastasis	Leishmaniasis
Systemic lupus erythematosus	Solid Neoplasm	Leishmaniasis
Systemic lupus erythematosus	Allodynia	Leishmaniasis
Systemic lupus erythematosus	Community acquired pneumonia	Staphylococcus aureus infection
Systemic lupus erythematosus	Squamous cell carcinoma of oropharynx	Leishmaniasis
Systemic lupus erythematosus	Hyperalgesia, Primary	Leishmaniasis
Systemic lupus erythematosus	Hyperalgesia, Secondary	Leishmaniasis
Systemic lupus erythematosus	Tactile Allodynia	Leishmaniasis
Systemic lupus erythematosus	Cardiovascular morbidity	Staphylococcus aureus infection
Systemic lupus erythematosus	Invasive Carcinoma	Leishmaniasis
Systemic lupus erythematosus	Bright Disease	Staphylococcus aureus infection
Systemic lupus erythematosus	Mechanical Allodynia	Leishmaniasis
Systemic lupus erythematosus	Sleep Apnea Syndromes	Leishmaniasis
Systemic lupus erythematosus	Cervix carcinoma	Leishmaniasis
Systemic lupus erythematosus	Chronic liver disease	Staphylococcus aureus infection
Systemic lupus erythematosus	Malignant neoplasm of liver	Leishmaniasis
Systemic lupus erythematosus	Weight decreased	Staphylococcus aureus infection
Systemic lupus erythematosus	Irritable Bowel Syndrome	Leishmaniasis
Systemic lupus erythematosus	Toxic Epidermal Necrolysis	Staphylococcus aureus infection
Systemic lupus erythematosus	Meningitis	Staphylococcus aureus infection
Systemic lupus erythematosus	Rheumatic Fever	Staphylococcus aureus infection
Systemic lupus erythematosus	Nephrotic Syndrome	Leishmaniasis
Systemic lupus erythematosus	Oropharyngeal disorders	Leishmaniasis
Systemic lupus erythematosus	Ovarian epithelial cancer recurrent	Leishmaniasis
Systemic lupus erythematosus	Childhood Burkitt Lymphoma	Staphylococcus aureus infection
Systemic lupus erythematosus	Epithelial ovarian cancer	Leishmaniasis
Systemic lupus erythematosus	Ischemia of kidney	Leishmaniasis
Systemic lupus erythematosus	Classical Hodgkin's Lymphoma	Staphylococcus aureus infection
Systemic lupus erythematosus	Experimental Organism Basal Cell Carcinoma	Leishmaniasis
Systemic lupus erythematosus	Malignant neoplasm of skin	Leishmaniasis
Systemic lupus erythematosus	Kaposi Sarcoma	Leishmaniasis
Systemic lupus erythematosus	Drug-Induced Liver Disease	Staphylococcus aureus infection
Systemic lupus erythematosus	Cardiomyopathies	Leishmaniasis
Systemic lupus erythematosus	Primary Effusion Lymphoma	Leishmaniasis
Systemic lupus erythematosus	Tumor Immunity	Staphylococcus aureus infection
Systemic lupus erythematosus	Malignant neoplasm of ovary	Leishmaniasis
Systemic lupus erythematosus	Drug usage	Leishmaniasis
Systemic lupus erythematosus	Obesity	Staphylococcus aureus infection
Systemic lupus erythematosus	Hepatitis, Drug-Induced	Staphylococcus aureus infection
Systemic lupus erythematosus	Periodontitis	Staphylococcus aureus infection
Systemic lupus erythematosus	Bacteremia	Staphylococcus aureus infection
Systemic lupus erythematosus	Bronchiolitis	Leishmaniasis
Systemic lupus erythematosus	Myocarditis	Staphylococcus aureus infection
Systemic lupus erythematosus	Respiratory Syncytial Virus Infections	Staphylococcus aureus infection
Systemic lupus erythematosus	Bronchial Hyperreactivity	Staphylococcus aureus infection
Systemic lupus erythematosus	Depressive Symptoms	Leishmaniasis
Systemic lupus erythematosus	Vascular lesions	Staphylococcus aureus infection
Systemic lupus erythematosus	airway disease	Staphylococcus aureus infection
Systemic lupus erythematosus	Aspirin exacerbated respiratory disease	Staphylococcus aureus infection
Systemic lupus erythematosus	HIV Coinfection	Autoimmune thyroid disease
Systemic lupus erythematosus	Microvascular Angina	Leishmaniasis
Systemic lupus erythematosus	Peripheral Arterial Diseases	Leishmaniasis
Systemic lupus erythematosus	Multiple Sclerosis, Relapsing-Remitting	Staphylococcus aureus infection
Systemic lupus erythematosus	Meningioma, benign, no ICD-O subtype	Leishmaniasis
Systemic lupus erythematosus	Coronary Artery Disease	Staphylococcus aureus infection
Systemic lupus erythematosus	Eczema Herpeticum	Staphylococcus aureus infection
Systemic lupus erythematosus	Precursor Cell Lymphoblastic Leukemia Lymphoma	Staphylococcus aureus infection
Systemic lupus erythematosus	Chronic kidney disease stage 5	Staphylococcus aureus infection
Systemic lupus erythematosus	Oropharyngeal Carcinoma	Staphylococcus aureus infection
Systemic lupus erythematosus	Intrahepatic Cholangiocarcinoma	Leishmaniasis
Systemic lupus erythematosus	Varicella zoster	Staphylococcus aureus infection
Systemic lupus erythematosus	Drug-Induced Acute Liver Injury	Staphylococcus aureus infection
Systemic lupus erythematosus	Testicular Germ Cell Tumor	Leishmaniasis
Systemic lupus erythematosus	Aspergillosis, Allergic Bronchopulmonary	Staphylococcus aureus infection
Systemic lupus erythematosus	Bacterial Endocarditis	Staphylococcus aureus infection
Systemic lupus erythematosus	Head and Neck Carcinoma	Autoimmune thyroid disease
Systemic lupus erythematosus	Pancreatitis	Staphylococcus aureus infection
Systemic lupus erythematosus	Early Rheumatoid Arthritis	Staphylococcus aureus infection
Systemic lupus erythematosus	Acne	Staphylococcus aureus infection
Systemic lupus erythematosus	cervical cancer	Staphylococcus aureus infection
Systemic lupus erythematosus	Selective immunoglobulin A deficiency	Staphylococcus aureus infection
Systemic lupus erythematosus	Breaking out	Staphylococcus aureus infection
Systemic lupus erythematosus	Arthropathy	Leishmaniasis
Systemic lupus erythematosus	Chemical and Drug Induced Liver Injury	Staphylococcus aureus infection
Systemic lupus erythematosus	Tropical Spastic Paraparesis	Leishmaniasis
Systemic lupus erythematosus	Polyarthritis	Staphylococcus aureus infection
Systemic lupus erythematosus	Chemically-Induced Liver Toxicity	Staphylococcus aureus infection
Systemic lupus erythematosus	Lyme Arthritis	Staphylococcus aureus infection
Systemic lupus erythematosus	Sacroiliitis	Staphylococcus aureus infection
Systemic lupus erythematosus	Spondylarthropathies	Leishmaniasis
Systemic lupus erythematosus	Intracranial Aneurysm	Leishmaniasis
Systemic lupus erythematosus	Cerebrovascular Disorders	Staphylococcus aureus infection
Systemic lupus erythematosus	Carotid Artery Diseases	Staphylococcus aureus infection
Systemic lupus erythematosus	Dermatomyositis	Staphylococcus aureus infection
Systemic lupus erythematosus	Encephalomyelitis	Staphylococcus aureus infection
Systemic lupus erythematosus	Pulpitis	Leishmaniasis
Systemic lupus erythematosus	Thromboangiitis Obliterans	Staphylococcus aureus infection
Systemic lupus erythematosus	Prostatic Neoplasms	Leishmaniasis
Systemic lupus erythematosus	Diabetic Retinopathy	Staphylococcus aureus infection
Systemic lupus erythematosus	Polymyositis	Leishmaniasis
Systemic lupus erythematosus	Diabetes, Autoimmune	Staphylococcus aureus infection
Systemic lupus erythematosus	Congestive heart failure	Leishmaniasis
Systemic lupus erythematosus	Inclusion Body Myositis (disorder)	Leishmaniasis
Systemic lupus erythematosus	Organ dysfunction syndrome	Leishmaniasis
Systemic lupus erythematosus	Hepatitis C	Staphylococcus aureus infection
Systemic lupus erythematosus	Squamous cell carcinoma of skin	Leishmaniasis
Systemic lupus erythematosus	Sjogren's Syndrome	Staphylococcus aureus infection
Systemic lupus erythematosus	Malaria	Staphylococcus aureus infection
Systemic lupus erythematosus	Infection by Cryptococcus neoformans	Staphylococcus aureus infection
Systemic lupus erythematosus	Malaria, Vivax	Leishmaniasis
Systemic lupus erythematosus	Arthritis, Psoriatic	Staphylococcus aureus infection
Systemic lupus erythematosus	Intestinal Neoplasms	Leishmaniasis
Systemic lupus erythematosus	Mycoses	Staphylococcus aureus infection
Systemic lupus erythematosus	Giant Cell Arteritis	Staphylococcus aureus infection
Systemic lupus erythematosus	Lymphoma, T-Cell, Cutaneous	Staphylococcus aureus infection
Systemic lupus erythematosus	Psychotic Disorders	Autoimmune thyroid disease
Systemic lupus erythematosus	Retinal Diseases	Staphylococcus aureus infection
Systemic lupus erythematosus	Pulmonary Emphysema	Staphylococcus aureus infection
Systemic lupus erythematosus	Trisomy	Staphylococcus aureus infection
Systemic lupus erythematosus	Vascular Diseases	Staphylococcus aureus infection
Systemic lupus erythematosus	Vasculitis	Staphylococcus aureus infection
Systemic lupus erythematosus	Biliary cirrhosis	Leishmaniasis
Systemic lupus erythematosus	Nephritis	Staphylococcus aureus infection
Systemic lupus erythematosus	Pregnancy Complications	Leishmaniasis
Systemic lupus erythematosus	Pancreatitis, Chronic	Leishmaniasis
Systemic lupus erythematosus	Sciatic Neuropathy	Staphylococcus aureus infection
Systemic lupus erythematosus	Cicatrix, Hypertrophic	Leishmaniasis
Systemic lupus erythematosus	Acute myocardial infarction	Staphylococcus aureus infection
Systemic lupus erythematosus	Inflammatory Breast Carcinoma	Leishmaniasis
Systemic lupus erythematosus	Amyloidosis	Staphylococcus aureus infection
Systemic lupus erythematosus	Anti-Basement Membrane Glomerulonephritis	Staphylococcus aureus infection
Systemic lupus erythematosus	Subacute Sclerosing Panencephalitis	Leishmaniasis
Systemic lupus erythematosus	Rheumatic disease of heart valve	Staphylococcus aureus infection
Systemic lupus erythematosus	Nonorganic psychosis	Autoimmune thyroid disease
Systemic lupus erythematosus	Helminthiasis	Leishmaniasis
Systemic lupus erythematosus	Inclusion Body Myopathy, Sporadic	Leishmaniasis
Systemic lupus erythematosus	ovarian neoplasm	Leishmaniasis
Systemic lupus erythematosus	Tauopathies	Leishmaniasis
Systemic lupus erythematosus	Dejerine-Sottas Disease (disorder)	Leishmaniasis
Systemic lupus erythematosus	Severe Dengue	Staphylococcus aureus infection
Systemic lupus erythematosus	Anti-Neutrophil Cytoplasmic Antibody-Associated Vasculitis	Staphylococcus aureus infection
Systemic lupus erythematosus	Decreased Concentration	Leishmaniasis
Systemic lupus erythematosus	DOSAGE-SENSITIVE SEX REVERSAL	Leishmaniasis
Systemic lupus erythematosus	Acute colitis	Leishmaniasis
Systemic lupus erythematosus	Infant, Premature	Staphylococcus aureus infection
Systemic lupus erythematosus	Takayasu Arteritis	Staphylococcus aureus infection
Systemic lupus erythematosus	Rhabdomyosarcoma	Leishmaniasis
Systemic lupus erythematosus	Arthritis, Adjuvant-Induced	Staphylococcus aureus infection
Systemic lupus erythematosus	Contact Dermatitis	Staphylococcus aureus infection
Systemic lupus erythematosus	Silicosis	Staphylococcus aureus infection
Systemic lupus erythematosus	MYELODYSPLASTIC SYNDROME	Leishmaniasis
Systemic lupus erythematosus	Chronic colitis	Leishmaniasis
Systemic lupus erythematosus	Allergy to peanuts	Staphylococcus aureus infection
Systemic lupus erythematosus	Subfertility, Male	Leishmaniasis
Systemic lupus erythematosus	Arthritis, Collagen-Induced	Staphylococcus aureus infection
Systemic lupus erythematosus	Arthritis, Experimental	Staphylococcus aureus infection
Systemic lupus erythematosus	Autoimmune arthritis	Staphylococcus aureus infection
Systemic lupus erythematosus	Unipolar Depression	Leishmaniasis
Systemic lupus erythematosus	Meningoencephalitis	Leishmaniasis
Systemic lupus erythematosus	Limb ischemia	Leishmaniasis
Systemic lupus erythematosus	Hypogammaglobulinemia	Leishmaniasis
Systemic lupus erythematosus	Malignant neoplasm of large intestine	Leishmaniasis
Systemic lupus erythematosus	pathologic fistula	Leishmaniasis
Systemic lupus erythematosus	Hamartoma Syndrome, Multiple	Staphylococcus aureus infection
Systemic lupus erythematosus	HTLV-I Infections	Leishmaniasis
Systemic lupus erythematosus	Waldenstrom Macroglobulinemia	Staphylococcus aureus infection
Systemic lupus erythematosus	Mycosis Fungoides	Staphylococcus aureus infection
Systemic lupus erythematosus	Papilloma	Leishmaniasis
Systemic lupus erythematosus	Periodontitis, Juvenile	Staphylococcus aureus infection
Systemic lupus erythematosus	Thyroiditis	Staphylococcus aureus infection
Systemic lupus erythematosus	Chronic gastritis	Leishmaniasis
Systemic lupus erythematosus	Major Depressive Disorder	Leishmaniasis
Systemic lupus erythematosus	Primary malignant neoplasm	Leishmaniasis
Systemic lupus erythematosus	Anaplastic thyroid carcinoma	Leishmaniasis
Systemic lupus erythematosus	Metastatic Renal Cell Cancer	Staphylococcus aureus infection
Systemic lupus erythematosus	Papule	Staphylococcus aureus infection
Systemic lupus erythematosus	High-Grade Squamous Intraepithelial Lesions	Leishmaniasis
Systemic lupus erythematosus	Primary sclerosing cholangitis	Staphylococcus aureus infection
Systemic lupus erythematosus	Skin carcinoma	Autoimmune thyroid disease
Systemic lupus erythematosus	Peripheral Neuropathy	Leishmaniasis
Systemic lupus erythematosus	Leukemia, Large Granular Lymphocytic	Leishmaniasis
Systemic lupus erythematosus	Hereditary Leiomyomatosis and Renal Cell Cancer	Leishmaniasis
Systemic lupus erythematosus	Neuropathy	Leishmaniasis
Systemic lupus erythematosus	Acute intermittent porphyria	Staphylococcus aureus infection
Systemic lupus erythematosus	Sleep Apnea, Central	Staphylococcus aureus infection
Systemic lupus erythematosus	Cockayne Syndrome, Type I	Staphylococcus aureus infection
Systemic lupus erythematosus	Coronary Aneurysm	Staphylococcus aureus infection
Systemic lupus erythematosus	Echinococcosis	Leishmaniasis
Systemic lupus erythematosus	Lymphohistiocytosis, Hemophagocytic	Leishmaniasis
Systemic lupus erythematosus	alpha 1-Antitrypsin Deficiency	Leishmaniasis
Systemic lupus erythematosus	Idiopathic Inflammatory Myopathies	Staphylococcus aureus infection
Systemic lupus erythematosus	Thyroid Diseases	Staphylococcus aureus infection
Systemic lupus erythematosus	Hepatitis E	Staphylococcus aureus infection
Systemic lupus erythematosus	Acute viral hepatitis	Staphylococcus aureus infection
Systemic lupus erythematosus	Hemorrhagic Fever, Ebola	Leishmaniasis
Systemic lupus erythematosus	Cardiac fibrosis	Leishmaniasis
Systemic lupus erythematosus	End Stage Liver Disease	Staphylococcus aureus infection
Systemic lupus erythematosus	Acral pseudolymphomatous angiokeratoma of children (APACHE)	Leishmaniasis
Systemic lupus erythematosus	Heymann Nephritis	Staphylococcus aureus infection
Systemic lupus erythematosus	Parvovirus B19 (disease)	Leishmaniasis
Systemic lupus erythematosus	Intrinsic asthma	Staphylococcus aureus infection
Systemic lupus erythematosus	Demyelinating Diseases	Staphylococcus aureus infection
Systemic lupus erythematosus	Autoimmune Primary Adrenal Insufficiency	Staphylococcus aureus infection
Systemic lupus erythematosus	Agranulocytosis	Staphylococcus aureus infection
Systemic lupus erythematosus	MYOTONIC DYSTROPHY 1	Leishmaniasis
Systemic lupus erythematosus	Acne Vulgaris	Leishmaniasis
Systemic lupus erythematosus	Spondylarthritis	Staphylococcus aureus infection
Systemic lupus erythematosus	Hepatitis, Autoimmune	Staphylococcus aureus infection
Systemic lupus erythematosus	Intestinal Diseases	Leishmaniasis
Systemic lupus erythematosus	Stickler syndrome, type 1	Leishmaniasis
Systemic lupus erythematosus	CNS disorder	Staphylococcus aureus infection
Systemic lupus erythematosus	Lymphomatoid Papulosis	Staphylococcus aureus infection
Systemic lupus erythematosus	Muscular Dystrophy, Duchenne	Leishmaniasis
Systemic lupus erythematosus	Neurocysticercosis	Staphylococcus aureus infection
Systemic lupus erythematosus	Glaucoma	Leishmaniasis
Systemic lupus erythematosus	Chronic granulomatous disease	Leishmaniasis
Systemic lupus erythematosus	Hemophilia A	Staphylococcus aureus infection
Systemic lupus erythematosus	Herpes Simplex Infections	Staphylococcus aureus infection
Systemic lupus erythematosus	Enterocolitis	Staphylococcus aureus infection
Systemic lupus erythematosus	Lyme Disease	Staphylococcus aureus infection
Systemic lupus erythematosus	Multiple Organ Failure	Leishmaniasis
Systemic lupus erythematosus	Scleroderma	Staphylococcus aureus infection
Systemic lupus erythematosus	nervous system disorder	Leishmaniasis
Systemic lupus erythematosus	Malignant neoplasm of lung	Leishmaniasis
Systemic lupus erythematosus	Neuralgia	Leishmaniasis
Systemic lupus erythematosus	Alveolar Bone Loss	Staphylococcus aureus infection
Systemic lupus erythematosus	Heat Stroke	Leishmaniasis
Systemic lupus erythematosus	Hypercalcemia	Leishmaniasis
Systemic lupus erythematosus	Esophagitis	Leishmaniasis
Systemic lupus erythematosus	Microscopic Polyarteritis	Staphylococcus aureus infection
Systemic lupus erythematosus	Lymphatic Diseases	Toll-like receptor signaling pathway
Systemic lupus erythematosus	Melioidosis	Leishmaniasis
Systemic lupus erythematosus	Anemia, Hemolytic	Staphylococcus aureus infection
Systemic lupus erythematosus	Familial lichen amyloidosis	Leishmaniasis
Systemic lupus erythematosus	IMMUNE SUPPRESSION	Leishmaniasis
Systemic lupus erythematosus	Benign Ovarian Neoplasm	Autoimmune thyroid disease
Systemic lupus erythematosus	Ischemia	Toxoplasmosis
Systemic lupus erythematosus	Human anaplasmosis due to Anaplasma phagocytophilum	Leishmaniasis
Systemic lupus erythematosus	Enterovirus Infections	Staphylococcus aureus infection
Systemic lupus erythematosus	Carotid Stenosis	Leishmaniasis
Systemic lupus erythematosus	Mycobacterium Infections	Staphylococcus aureus infection
Systemic lupus erythematosus	Adult Hepatocellular Carcinoma	Complement and coagulation cascades
Systemic lupus erythematosus	Leprosy	Staphylococcus aureus infection
Systemic lupus erythematosus	Squamous cell carcinoma of tonsil	Autoimmune thyroid disease
Systemic lupus erythematosus	Libman-Sacks Disease	Staphylococcus aureus infection
Systemic lupus erythematosus	Polyendocrinopathies, Autoimmune	Staphylococcus aureus infection
Systemic lupus erythematosus	Malignant ascites	Systemic lupus erythematosus
Systemic lupus erythematosus	COLORBLINDNESS, PARTIAL, DEUTAN SERIES	Staphylococcus aureus infection
Systemic lupus erythematosus	Adult type dermatomyositis	Staphylococcus aureus infection
Systemic lupus erythematosus	Chlamydia Infections	Staphylococcus aureus infection
Systemic lupus erythematosus	Abscess	Leishmaniasis
Systemic lupus erythematosus	Peptic Esophagitis	Leishmaniasis
Systemic lupus erythematosus	Senile Plaques	Staphylococcus aureus infection
Systemic lupus erythematosus	Gastro-esophageal reflux disease with esophagitis	Leishmaniasis
Systemic lupus erythematosus	Sentinel node (disorder)	Staphylococcus aureus infection
Systemic lupus erythematosus	Extrahepatic Cholangiocarcinoma	Leishmaniasis
Systemic lupus erythematosus	Agammaglobulinemia	Leishmaniasis
Systemic lupus erythematosus	Escherichia coli Infections	Staphylococcus aureus infection
Systemic lupus erythematosus	Infectious Mononucleosis	Staphylococcus aureus infection
Systemic lupus erythematosus	Systemic candidiasis	Staphylococcus aureus infection
Systemic lupus erythematosus	Hantavirus Infections	Staphylococcus aureus infection
Systemic lupus erythematosus	X-Linked Lymphoproliferative Disorder	Staphylococcus aureus infection
Systemic lupus erythematosus	Acquired Hypogammaglobulinemia	Staphylococcus aureus infection
Systemic lupus erythematosus	Hemophagocytic Syndrome	Leishmaniasis
Systemic lupus erythematosus	Autoimmune state	Staphylococcus aureus infection
Systemic lupus erythematosus	Candidiasis, Chronic Mucocutaneous	Leishmaniasis
Systemic lupus erythematosus	Shigella Infections	Leishmaniasis
Systemic lupus erythematosus	Guillain-Barre Syndrome	Staphylococcus aureus infection
Systemic lupus erythematosus	Polyglandular Type I Autoimmune Syndrome	Staphylococcus aureus infection
Systemic lupus erythematosus	Addison's disease due to autoimmunity	Autoimmune thyroid disease
Systemic lupus erythematosus	Erythema Nodosum	Staphylococcus aureus infection
Systemic lupus erythematosus	Fulminant hepatitis	Staphylococcus aureus infection
Systemic lupus erythematosus	Post-transplant lymphoproliferative disorder	Staphylococcus aureus infection
Systemic lupus erythematosus	Painful Bladder Syndrome	Staphylococcus aureus infection
Systemic lupus erythematosus	Malignant neoplasm of prostate	Leishmaniasis
Systemic lupus erythematosus	SVEINSSON CHORIORETINAL ATROPHY	Leishmaniasis
Systemic lupus erythematosus	Epithelial hyperplasia of skin	Leishmaniasis
Systemic lupus erythematosus	Febrile Convulsions	Staphylococcus aureus infection
Systemic lupus erythematosus	Delirium	Leishmaniasis
Systemic lupus erythematosus	Herpes zoster disease	Staphylococcus aureus infection
Systemic lupus erythematosus	Opportunistic Infections	Staphylococcus aureus infection
Systemic lupus erythematosus	Optic Neuritis	Staphylococcus aureus infection
Systemic lupus erythematosus	Postherpetic neuralgia	Leishmaniasis
Systemic lupus erythematosus	Schistosomiasis	Staphylococcus aureus infection
Systemic lupus erythematosus	Schistosomiasis mansoni	Staphylococcus aureus infection
Systemic lupus erythematosus	Psoriasis vulgaris	Staphylococcus aureus infection
Systemic lupus erythematosus	Multiple Sclerosis, Acute Fulminating	Staphylococcus aureus infection
Systemic lupus erythematosus	Alzheimer Disease, Late Onset	Staphylococcus aureus infection
Systemic lupus erythematosus	Arteriosclerosis	Staphylococcus aureus infection
Systemic lupus erythematosus	Atherosclerosis	Staphylococcus aureus infection
Systemic lupus erythematosus	Bipolar Disorder	Leishmaniasis
Systemic lupus erythematosus	Somnolence	Staphylococcus aureus infection
Systemic lupus erythematosus	Cardiovascular Diseases	Staphylococcus aureus infection
Systemic lupus erythematosus	Primary biliary cirrhosis	Staphylococcus aureus infection
Systemic lupus erythematosus	Collagen Diseases	Staphylococcus aureus infection
Systemic lupus erythematosus	Rheumatism	Staphylococcus aureus infection
Systemic lupus erythematosus	Confusion	Staphylococcus aureus infection
Systemic lupus erythematosus	Coronary heart disease	Staphylococcus aureus infection
Systemic lupus erythematosus	Dermatitis	Staphylococcus aureus infection
Systemic lupus erythematosus	Eclampsia	Staphylococcus aureus infection
Systemic lupus erythematosus	Overweight	Leishmaniasis
Systemic lupus erythematosus	Fatty Liver, Alcoholic	Leishmaniasis
Systemic lupus erythematosus	MYELOPROLIFERATIVE SYNDROME, TRANSIENT	Staphylococcus aureus infection
Systemic lupus erythematosus	Fibrosarcoma	Leishmaniasis
Systemic lupus erythematosus	SMITH-MCCORT DYSPLASIA 1	Leishmaniasis
Systemic lupus erythematosus	Chronic Fatigue Syndrome	Staphylococcus aureus infection
Systemic lupus erythematosus	Hypercholesterolemia	Staphylococcus aureus infection
Systemic lupus erythematosus	Hypercholesterolemia, Familial	Staphylococcus aureus infection
Systemic lupus erythematosus	Cryopyrin-Associated Periodic Syndromes	Leishmaniasis
Systemic lupus erythematosus	Aplastic Anemia	Staphylococcus aureus infection
Systemic lupus erythematosus	Eosinophilic granulomatosis with polyangiitis	Staphylococcus aureus infection
Systemic lupus erythematosus	Hemiparesis	Leishmaniasis
Systemic lupus erythematosus	Neurodegenerative Disorders	Leishmaniasis
Systemic lupus erythematosus	Paroxysmal nocturnal hemoglobinuria	Staphylococcus aureus infection
Systemic lupus erythematosus	Metaplasia	Autoimmune thyroid disease
Systemic lupus erythematosus	Orchitis	Staphylococcus aureus infection
Systemic lupus erythematosus	Sialadenitis	Leishmaniasis
Systemic lupus erythematosus	Hypertriglyceridemia	Staphylococcus aureus infection
Systemic lupus erythematosus	Uveomeningoencephalitic Syndrome	Staphylococcus aureus infection
Systemic lupus erythematosus	Lymphoma, Large-Cell, Follicular	Leishmaniasis
Systemic lupus erythematosus	Low Grade Lymphoma (neoplasm)	Systemic lupus erythematosus
Systemic lupus erythematosus	Adult-Onset Still Disease	Staphylococcus aureus infection
Systemic lupus erythematosus	Influenza	Staphylococcus aureus infection
Systemic lupus erythematosus	CREST Syndrome	Staphylococcus aureus infection
Systemic lupus erythematosus	Kidney Diseases	Staphylococcus aureus infection
Systemic lupus erythematosus	Immunologic hypersensitivity	Staphylococcus aureus infection
Systemic lupus erythematosus	Skin bullae	Staphylococcus aureus infection
Systemic lupus erythematosus	Coffin-Siris syndrome	Staphylococcus aureus infection
Systemic lupus erythematosus	Lymphoproliferative Disorders	Staphylococcus aureus infection
Systemic lupus erythematosus	Myasthenia Gravis, Ocular	Staphylococcus aureus infection
Systemic lupus erythematosus	Diffuse Scleroderma	Staphylococcus aureus infection
Systemic lupus erythematosus	Autoimmune Lymphoproliferative Syndrome	Leishmaniasis
Systemic lupus erythematosus	Malaria, Cerebral	Staphylococcus aureus infection
Systemic lupus erythematosus	Systemic onset juvenile chronic arthritis	Staphylococcus aureus infection
Systemic lupus erythematosus	Abnormal blistering of the skin	Staphylococcus aureus infection
Systemic lupus erythematosus	Skin blisters	Staphylococcus aureus infection
Systemic lupus erythematosus	Recurrent aphthous ulcer	Staphylococcus aureus infection
Systemic lupus erythematosus	Oligoarticular Juvenile Idiopathic Arthritis	Staphylococcus aureus infection
Systemic lupus erythematosus	Aggressive natural killer-cell leukemia	Staphylococcus aureus infection
Systemic lupus erythematosus	Leishmaniasis, Visceral	Staphylococcus aureus infection
Systemic lupus erythematosus	Neuromyelitis Optica	Staphylococcus aureus infection
Systemic lupus erythematosus	Rheumatoid Arthritis	Staphylococcus aureus infection
Systemic lupus erythematosus	Metabolic Diseases	Toll-like receptor signaling pathway
Systemic lupus erythematosus	Splenomegaly	Leishmaniasis
Systemic lupus erythematosus	Thrombocytopenia	Staphylococcus aureus infection
Systemic lupus erythematosus	Infective endocarditis	Staphylococcus aureus infection
Systemic lupus erythematosus	Histiocytosis, Langerhans-Cell	Leishmaniasis
Systemic lupus erythematosus	Antiphospholipid Syndrome	Staphylococcus aureus infection
Systemic lupus erythematosus	Lymphoid hyperplasia	Leishmaniasis
Systemic lupus erythematosus	Prostate carcinoma	Leishmaniasis
Systemic lupus erythematosus	Malnutrition	Staphylococcus aureus infection
Systemic lupus erythematosus	Aortic Aneurysm, Abdominal	Staphylococcus aureus infection
Systemic lupus erythematosus	Non-obstructive azoospermia	Staphylococcus aureus infection
Systemic lupus erythematosus	Abdominal discomfort	Leishmaniasis
Systemic lupus erythematosus	Dyslipidemias	Leishmaniasis
Systemic lupus erythematosus	CONSTRICTING BANDS, CONGENITAL	Staphylococcus aureus infection
Systemic lupus erythematosus	Coinfection	Staphylococcus aureus infection
Systemic lupus erythematosus	Diffuse cutaneous leishmaniasis	Leishmaniasis
Systemic lupus erythematosus	Disseminated neuroblastoma	Autoimmune thyroid disease
Systemic lupus erythematosus	Stage 4S neuroblastoma	Toll-like receptor signaling pathway
Systemic lupus erythematosus	Glaucoma, Primary Open Angle	Leishmaniasis
Systemic lupus erythematosus	Epidermodysplasia Verruciformis	Staphylococcus aureus infection
Systemic lupus erythematosus	Pneumococcal Infections	Staphylococcus aureus infection
Systemic lupus erythematosus	Respiratory syncytial virus (RSV) infection in conditions classified elsewhere and of unspecified site	Staphylococcus aureus infection
Systemic lupus erythematosus	Paratuberculosis	Staphylococcus aureus infection
Systemic lupus erythematosus	Toxic Shock Syndrome	Staphylococcus aureus infection
Systemic lupus erythematosus	Non-alcoholic Fatty Liver Disease	Leishmaniasis
Systemic lupus erythematosus	Primary antiphospholipid syndrome	Staphylococcus aureus infection
Systemic lupus erythematosus	Otitis Media	Leishmaniasis
Systemic lupus erythematosus	Cervical intraepithelial neoplasia grade 1	Staphylococcus aureus infection
Systemic lupus erythematosus	Cervical intraepithelial neoplasia grade 2	Leishmaniasis
Systemic lupus erythematosus	Chronic Infantile Neurological, Cutaneous, and Articular Syndrome	Staphylococcus aureus infection
Systemic lupus erythematosus	Low Grade Squamous Intraepithelial Neoplasia	Staphylococcus aureus infection
Systemic lupus erythematosus	Metabolic Syndrome X	Leishmaniasis
Systemic lupus erythematosus	Breast Carcinoma	Leishmaniasis
Systemic lupus erythematosus	Osteosarcoma of bone	Leishmaniasis
Systemic lupus erythematosus	Gastrointestinal pain	Leishmaniasis
Systemic lupus erythematosus	Incontinentia Pigmenti Achromians	Staphylococcus aureus infection
Systemic lupus erythematosus	Hyperlipoproteinemia Type IIa	Leishmaniasis
Systemic lupus erythematosus	Endothelial dysfunction	Staphylococcus aureus infection
Systemic lupus erythematosus	Vascular inflammations	Leishmaniasis
Systemic lupus erythematosus	Central nervous system lymphoma	Leishmaniasis
Systemic lupus erythematosus	ATRICHIA WITH PAPULAR LESIONS	Staphylococcus aureus infection
Systemic lupus erythematosus	PITUITARY ADENOMA PREDISPOSITION (disorder)	Staphylococcus aureus infection
Systemic lupus erythematosus	Arthritis, Reactive	Staphylococcus aureus infection
Systemic lupus erythematosus	Allergic rhinitis (disorder)	Staphylococcus aureus infection
Systemic lupus erythematosus	Nasopharyngeal carcinoma	Leishmaniasis
Systemic lupus erythematosus	Juvenile arthritis	Staphylococcus aureus infection
Systemic lupus erythematosus	Pneumonitis	Staphylococcus aureus infection
Systemic lupus erythematosus	Juvenile rheumatoid arthritis	Staphylococcus aureus infection
Systemic lupus erythematosus	Indian childhood cirrhosis	Staphylococcus aureus infection
Systemic lupus erythematosus	Chronic graft-versus-host disease	Leishmaniasis
Systemic lupus erythematosus	Herpesviridae Infections	Staphylococcus aureus infection
Systemic lupus erythematosus	Bronchopulmonary Dysplasia	Leishmaniasis
Systemic lupus erythematosus	Coughing	Leishmaniasis
Systemic lupus erythematosus	Cavitation	Leishmaniasis
Systemic lupus erythematosus	Malignant tumor of colon	Leishmaniasis
Systemic lupus erythematosus	Hepatic Form of Wilson Disease	Leishmaniasis
Systemic lupus erythematosus	Leishmaniasis, Cutaneous	Leishmaniasis
Systemic lupus erythematosus	Pneumonia	Staphylococcus aureus infection
Systemic lupus erythematosus	Respiration Disorders	Leishmaniasis
Systemic lupus erythematosus	Respiratory Distress Syndrome, Newborn	Leishmaniasis
Systemic lupus erythematosus	Respiratory Distress Syndrome, Adult	Staphylococcus aureus infection
Systemic lupus erythematosus	Osteomyelitis	Leishmaniasis
Systemic lupus erythematosus	Lichen Planus, Oral	Staphylococcus aureus infection
Systemic lupus erythematosus	Respiratory Tract Diseases	Staphylococcus aureus infection
Systemic lupus erythematosus	Severe hereditary factor VIII deficiency disease	Staphylococcus aureus infection
Systemic lupus erythematosus	Acute Kidney Insufficiency	Staphylococcus aureus infection
Systemic lupus erythematosus	Hamman-Rich syndrome	Leishmaniasis
Systemic lupus erythematosus	Lung Diseases, Interstitial	Staphylococcus aureus infection
Systemic lupus erythematosus	Epithelial hyperplasia	Autoimmune thyroid disease
Systemic lupus erythematosus	High Grade Lymphoma (neoplasm)	Staphylococcus aureus infection
Systemic lupus erythematosus	CARCINOMA OF VULVA	Leishmaniasis
Systemic lupus erythematosus	Persistent infection	Staphylococcus aureus infection
Systemic lupus erythematosus	Interstitial lung fibrosis	Staphylococcus aureus infection
Systemic lupus erythematosus	SPONDYLOCARPOTARSAL SYNOSTOSIS SYNDROME	Staphylococcus aureus infection
Systemic lupus erythematosus	Melanoma, B16	Staphylococcus aureus infection
Systemic lupus erythematosus	Lichen Planus	Staphylococcus aureus infection
Systemic lupus erythematosus	Bullous pemphigoid	Staphylococcus aureus infection
Systemic lupus erythematosus	Lymphoma, Intermediate-Grade	Staphylococcus aureus infection
Systemic lupus erythematosus	Lymphoma, AIDS-Related	Autoimmune thyroid disease
Systemic lupus erythematosus	Chagas Disease	Leishmaniasis
Systemic lupus erythematosus	Squamous intraepithelial lesion	Leishmaniasis
Systemic lupus erythematosus	Mixed cryoglobulinemia	Staphylococcus aureus infection
Systemic lupus erythematosus	Chronic idiopathic neutropenia	Leishmaniasis
Systemic lupus erythematosus	Liver carcinoma	Leishmaniasis
Systemic lupus erythematosus	X-linked agammaglobulinemia	Staphylococcus aureus infection
Systemic lupus erythematosus	Graves Disease	Staphylococcus aureus infection
Systemic lupus erythematosus	Hypersensitivity	Staphylococcus aureus infection
Systemic lupus erythematosus	Immune System Diseases	Staphylococcus aureus infection
Systemic lupus erythematosus	Acute kidney injury	Staphylococcus aureus infection
Systemic lupus erythematosus	Thyroid associated opthalmopathies	Leishmaniasis
Systemic lupus erythematosus	Allergic Reaction	Staphylococcus aureus infection
Systemic lupus erythematosus	Brain Diseases	Leishmaniasis
Systemic lupus erythematosus	Anterior uveitis	Staphylococcus aureus infection
Systemic lupus erythematosus	Disorder of eye	Staphylococcus aureus infection
Systemic lupus erythematosus	Acute anterior uveitis	Staphylococcus aureus infection
Systemic lupus erythematosus	Gonorrhea	Staphylococcus aureus infection
Systemic lupus erythematosus	Ocular Cicatricial Pemphigoid	Staphylococcus aureus infection
Systemic lupus erythematosus	Idiopathic crescentic glomerulonephritis	Staphylococcus aureus infection
Systemic lupus erythematosus	Hyperglycemia	Staphylococcus aureus infection
Systemic lupus erythematosus	Acute periodontitis	Staphylococcus aureus infection
Systemic lupus erythematosus	Thrombocytopenia due to platelet alloimmunization	Staphylococcus aureus infection
Systemic lupus erythematosus	Photophobia	Autoimmune thyroid disease
Systemic lupus erythematosus	Agenesis	Leishmaniasis
Systemic lupus erythematosus	Bronchiolitis Obliterans	Staphylococcus aureus infection
Systemic lupus erythematosus	Adrenoleukodystrophy	Leishmaniasis
Systemic lupus erythematosus	Superficial ulcer	Staphylococcus aureus infection
Systemic lupus erythematosus	Hematologic Neoplasms	Leishmaniasis
Systemic lupus erythematosus	Septicaemia due to gram-negative organism, unspecified	Staphylococcus aureus infection
Systemic lupus erythematosus	Excessive daytime somnolence	Staphylococcus aureus infection
Systemic lupus erythematosus	Colonic Neoplasms	Leishmaniasis
Systemic lupus erythematosus	Congenital Abnormality	Complement and coagulation cascades
Systemic lupus erythematosus	Adenoma	Leishmaniasis
Systemic lupus erythematosus	Peri-Implantitis	Staphylococcus aureus infection
Systemic lupus erythematosus	Hyper-IgM Immunodeficiency Syndrome, Type 1	Leishmaniasis
Systemic lupus erythematosus	Alcoholic Intoxication, Chronic	Leishmaniasis
Systemic lupus erythematosus	Dermatomyositis, Childhood Type	Staphylococcus aureus infection
Systemic lupus erythematosus	Pemphigus	Staphylococcus aureus infection
Systemic lupus erythematosus	Purpura, Thrombotic Thrombocytopenic	Staphylococcus aureus infection
Systemic lupus erythematosus	Vasculitis of the skin	Staphylococcus aureus infection
Systemic lupus erythematosus	Pemphigus Foliaceus	Staphylococcus aureus infection
Systemic lupus erythematosus	Infection	Staphylococcus aureus infection
Systemic lupus erythematosus	Van der Woude syndrome	Leishmaniasis
Systemic lupus erythematosus	Meningococcemia	Staphylococcus aureus infection
Systemic lupus erythematosus	Photodysphoria	Autoimmune thyroid disease
Systemic lupus erythematosus	Acute interstitial pneumonia	Staphylococcus aureus infection
Systemic lupus erythematosus	Malignant neoplasm of vulva	Leishmaniasis
Systemic lupus erythematosus	Malignant neoplasm of urinary bladder	Leishmaniasis
Systemic lupus erythematosus	Sarcoidosis, Pulmonary	Staphylococcus aureus infection
Systemic lupus erythematosus	Anti-Glomerular Basement Membrane Disease	Staphylococcus aureus infection
Systemic lupus erythematosus	Juvenile Myoclonic Epilepsy	Staphylococcus aureus infection
Systemic lupus erythematosus	Bacterial Infections	Staphylococcus aureus infection
Systemic lupus erythematosus	Blast Phase	Leishmaniasis
Systemic lupus erythematosus	Bladder Neoplasm	Leishmaniasis
Systemic lupus erythematosus	Burkitt Lymphoma	Staphylococcus aureus infection
Systemic lupus erythematosus	Cerebral Palsy	Leishmaniasis
Systemic lupus erythematosus	Diarrhea	Leishmaniasis
Systemic lupus erythematosus	Eosinophilia	Leishmaniasis
Systemic lupus erythematosus	African Trypanosomiasis	Leishmaniasis
Systemic lupus erythematosus	Fatigue	Leishmaniasis
Systemic lupus erythematosus	Onchocerciasis	Staphylococcus aureus infection
Systemic lupus erythematosus	Gastritis	Staphylococcus aureus infection
Systemic lupus erythematosus	Hematological Disease	Staphylococcus aureus infection
Systemic lupus erythematosus	Rosacea	Staphylococcus aureus infection
Systemic lupus erythematosus	Streptococcal Infections	Staphylococcus aureus infection
Systemic lupus erythematosus	Malignant Neoplasms	Leishmaniasis
Systemic lupus erythematosus	Lymphoid leukemia	Leishmaniasis
Systemic lupus erythematosus	Acute Megakaryocytic Leukemias	Leishmaniasis
Systemic lupus erythematosus	PEELING SKIN SYNDROME	Staphylococcus aureus infection
Systemic lupus erythematosus	Chronic multifocal osteomyelitis	Leishmaniasis
Systemic lupus erythematosus	Leukemia, Myelomonocytic, Chronic	Leishmaniasis
Systemic lupus erythematosus	West Nile viral infection	Leishmaniasis
Systemic lupus erythematosus	TNF receptor-associated periodic fever syndrome (TRAPS)	Staphylococcus aureus infection
Systemic lupus erythematosus	Crohn's disease of the ileum	Staphylococcus aureus infection
Systemic lupus erythematosus	Adult T-Cell Lymphoma/Leukemia	Leishmaniasis
Systemic lupus erythematosus	Elevated C-reactive protein	Staphylococcus aureus infection
Systemic lupus erythematosus	Elevated C-reactive protein level	Staphylococcus aureus infection
Systemic lupus erythematosus	Pneumonia, Bacterial	Leishmaniasis
Systemic lupus erythematosus	Monosomy	Staphylococcus aureus infection
Systemic lupus erythematosus	Eosinophilia-Myalgia Syndrome	Staphylococcus aureus infection
Systemic lupus erythematosus	Brittle diabetes	Staphylococcus aureus infection
Systemic lupus erythematosus	Diabetes Mellitus, Ketosis-Prone	Staphylococcus aureus infection
Systemic lupus erythematosus	Psoriasiform eczema	Staphylococcus aureus infection
Systemic lupus erythematosus	Plasmacytoma	Staphylococcus aureus infection
Systemic lupus erythematosus	Squamous cell carcinoma	Leishmaniasis
Systemic lupus erythematosus	Precancerous Conditions	Leishmaniasis
Systemic lupus erythematosus	Sezary Syndrome	Leishmaniasis
Systemic lupus erythematosus	Thrombocythemia, Essential	Leishmaniasis
Systemic lupus erythematosus	Thymoma	Staphylococcus aureus infection
Systemic lupus erythematosus	Severe Combined Immunodeficiency	Leishmaniasis
Systemic lupus erythematosus	Acute leukemia	Leishmaniasis
Systemic lupus erythematosus	Pauci-immune Glomerulonephritis associated with Granulomatosis with Polyangiitis	Staphylococcus aureus infection
Systemic lupus erythematosus	Monocytosis	Staphylococcus aureus infection
Systemic lupus erythematosus	Collagen-vascular disease	Leishmaniasis
Systemic lupus erythematosus	Leishmaniasis, New World	Leishmaniasis
Systemic lupus erythematosus	Urban cutaneous leishmaniasis	Leishmaniasis
Systemic lupus erythematosus	Leprosy, Lepromatous	Staphylococcus aureus infection
Systemic lupus erythematosus	Cystic Fibrosis	Staphylococcus aureus infection
Systemic lupus erythematosus	Congenital chromosomal disease	Cell adhesion molecules (CAMs)
Systemic lupus erythematosus	Severe Aplastic Anemia	Leishmaniasis
Systemic lupus erythematosus	Parkinsonian Disorders	Autoimmune thyroid disease
Systemic lupus erythematosus	Cryptosporidiosis	Staphylococcus aureus infection
Systemic lupus erythematosus	Respiratory Tract Infections	Staphylococcus aureus infection
Systemic lupus erythematosus	Carcinoma breast stage IV	Leishmaniasis
Systemic lupus erythematosus	Appendicitis	Leishmaniasis
Systemic lupus erythematosus	Immediate hypersensitivity	Leishmaniasis
Systemic lupus erythematosus	Upper Respiratory Infections	Leishmaniasis
Systemic lupus erythematosus	Pouchitis	Leishmaniasis
Systemic lupus erythematosus	Acute asthma	Leishmaniasis
Systemic lupus erythematosus	Nasal allergies	Staphylococcus aureus infection
Systemic lupus erythematosus	Tumor Necrosis Factor Receptor 1-Associated Periodic Syndrome	Staphylococcus aureus infection
Systemic lupus erythematosus	Hay fever	Staphylococcus aureus infection
Systemic lupus erythematosus	Lupus Erythematosus, Subacute Cutaneous	Staphylococcus aureus infection
Systemic lupus erythematosus	Active tuberculosis	Staphylococcus aureus infection
Systemic lupus erythematosus	Tuberculosis, extrapulmonary	Staphylococcus aureus infection
Systemic lupus erythematosus	Berylliosis	Staphylococcus aureus infection
Systemic lupus erythematosus	Ulcerative Colitis	Staphylococcus aureus infection
Systemic lupus erythematosus	Paracoccidioidomycosis	Staphylococcus aureus infection
Systemic lupus erythematosus	Inflammatory neuropathy	Systemic lupus erythematosus
Systemic lupus erythematosus	Beryllium Disease	Staphylococcus aureus infection
Systemic lupus erythematosus	Chronic arthritis	Leishmaniasis
[truncated: 25,099 more rows]
